# Supplementary material for: Iron promoted end-on dinitrogen-bridging in heterobimetallic complexes of uranium and lanthanides
Source: Royal Society of Chemistry journal article supplement (doi:10.1039/d4sc01050g), 2024-01-01
Supplement: d4sc01050g1.pdf [file d4sc01050g1.pdf]

ELECTRONIC SUPPORTING INFORMATION

**Iron promoted end-on dinitrogen-bridging in heterobimetallic complexes of uranium and lanthanides**

Nadir Jori,<sup>a§</sup> Juan J. Moreno,<sup>a,§</sup> R. A. Keerthi Shivaraam,<sup>a</sup> Thayalan Rajeshkumar,<sup>b</sup> Rosario Scopelliti,<sup>a</sup> Laurent Maron\*,<sup>b</sup> Jesús Campos,<sup>c</sup> Marinella Mazzanti\*<sup>a</sup>

<sup>a</sup>Group of Coordination Chemistry Institut des Sciences et Ingénierie Chimiques, École Polytechnique Fédérale de Lausanne (EPFL), 1015 Lausanne, Switzerland. E-mail: [marinella.mazzanti@epfl.ch](mailto:marinella.mazzanti@epfl.ch)

<sup>b</sup>Laboratoire de Physique et Chimie des Nano-objets, Institut National des Sciences Appliquées, 31077 Toulouse, Cedex 4, France; E-mail: [laurent.maron@irsamc.ups-tlse.fr](mailto:laurent.maron@irsamc.ups-tlse.fr)

<sup>c</sup>Instituto de Investigaciones Químicas (IIQ), Departamento de Química Inorgánica and Centro de Innovación en Química Avanzada (ORFEO-CINQA), Consejo Superior de Investigaciones Científicas (CSIC) and Universidad de Sevilla, 41092 Sevilla, Spain.

\*To whom correspondence should be addressed.

## Table of Contents

|                                             |            |
|---------------------------------------------|------------|
| <b><i>Table of Contents</i></b> .....       | <b>2</b>   |
| <b><i>Experimental Procedures</i></b> ..... | <b>3</b>   |
| <b><i>NMR Spectra</i></b> .....             | <b>7</b>   |
| <b><i>X-ray crystallography</i></b> .....   | <b>41</b>  |
| <b><i>EPR data</i></b> .....                | <b>47</b>  |
| <b><i>IR data</i></b> .....                 | <b>54</b>  |
| <b><i>Computational Details</i></b> .....   | <b>60</b>  |
| <b><i>Optimized Coordinates</i></b> .....   | <b>73</b>  |
| <b><i>References</i></b> .....              | <b>124</b> |



## Experimental Procedures

**General Considerations** Unless otherwise noted, all manipulations were carried out at ambient temperature under an inert argon or nitrogen atmosphere using Schlenk techniques and an MBraun glovebox equipped with a purifier unit. The water and oxygen levels were always kept at less than 0.1 ppm. Glassware was dried overnight at 140 °C before use.

**NMR experiments** were carried out using NMR tubes adapted with J-Young valves. NMR spectra were recorded on a Bruker 400 MHz spectrometers. NMR chemical shifts are reported in ppm with solvent as internal reference.

**Elemental analyses** were performed under nitrogen using a Thermo Scientific Flash 2000 Organic Elemental Analyzer at the Institute of Chemistry and Chemical Engineering at EPFL.

**Starting materials** Unless otherwise noted, reagents were purchased from commercial suppliers and used without further purification. Anhydrous solvents were purchased from Aldrich and further distilled from K/benzophenone (THF, Et<sub>2</sub>O, toluene). Deuterated solvents for NMR spectroscopy (d<sub>8</sub>-thf, d<sub>8</sub>-toluene) were purchased from CortecNet, freeze-degassed and distilled over K/benzophenone.

Depleted uranium was purchased from Ibilabs, Florida, USA. [Fe(depe)<sub>2</sub>(N<sub>2</sub>)], **A**, depe = Et<sub>2</sub>PCH<sub>2</sub>CH<sub>2</sub>PEt<sub>2</sub>,<sup>1</sup> [U<sup>III</sup>(C<sub>5</sub>Me<sub>4</sub>H)<sub>3</sub>],<sup>2</sup> [U<sup>III</sup>{N(SiMe<sub>3</sub>)<sub>2</sub>}<sub>3</sub>],<sup>3</sup> [U<sup>III</sup>{N(SiMe<sub>2</sub>Ph)<sub>2</sub>}<sub>3</sub>],<sup>4</sup> [U(ODtbp)<sub>3</sub>], ODtbp = O-2,6-<sup>t</sup>Bu<sub>2</sub>C<sub>6</sub>H<sub>3</sub>,<sup>5</sup> [U(OTtbp)<sub>3</sub>], OTtbp = O-2,4,6-<sup>t</sup>Bu<sub>3</sub>C<sub>6</sub>H<sub>2</sub>,<sup>5</sup> [Ln<sup>III</sup>{N(SiMe<sub>3</sub>)<sub>2</sub>}<sub>3</sub>] (Ln= Ce, Sm and Dy),<sup>6</sup> [Tm<sup>III</sup>{N(SiMe<sub>3</sub>)<sub>2</sub>}<sub>3</sub>],<sup>7</sup> [Sm<sup>II</sup>{N(SiMe<sub>3</sub>)<sub>2</sub>}<sub>2</sub>],<sup>8</sup> and [Yb<sup>II</sup>{N(SiMe<sub>3</sub>)<sub>2</sub>}<sub>2</sub>(thf)<sub>2</sub>]<sup>9</sup> were prepared according to the published procedure.

**EPR.** EPR experiments were recorded with a Bruker Elexsys E500 spectrometer working at 9.4 GHz frequency with an Oxford ESR900 cryostat for 4-300 K operations.

**FT-IR spectra** were recorded with a Perkin Elmer 1600 Series FTIR spectrophotometer flushed with N<sub>2</sub>.

### Syntheses

In general the synthesis of the dinitrogen complexes was performed by mixing the components at low temperature and let standing at -40 °C for 12-48 hours. Carrying out the reaction (mixing the components) at room temperature leads to the same outcome, but isolation of the complex requires low temperature. In general low temperature reactions are preferred when the precursor (U(III) and Sm(II)) are thermally unstable.

**Reaction of A with [U<sup>III</sup>(C<sub>5</sub>Me<sub>4</sub>H)<sub>3</sub>] at -40 °C in toluene.** A cold (-40 °C) dark brown d<sub>8</sub>-toluene solution (0.6 mL) of [[U<sup>III</sup>(C<sub>5</sub>Me<sub>4</sub>H)<sub>3</sub>] (8.0 mg, 0.013 mmol, 1 equiv) in was added to orange solid **A** (6.6 mg, 0.013 mmol, 1 equiv) under Ar, resulting in a brown-reddish solution. The <sup>31</sup>P{<sup>1</sup>H} NMR spectrum at -40 °C and 25 °C of the reaction mixture (Figures S1 and S3) shows the sharp resonance at δ = 84.6 ppm (s) corresponding to **A**. The <sup>1</sup>H NMR spectrum shows the signals of the two starting complexes, indicating that no binding is observed (Figure S2).

**Synthesis of [{Fe(depe)<sub>2</sub>}(μ-η<sup>1</sup>:η<sup>1</sup>-N<sub>2</sub>)(U{N(SiMe<sub>3</sub>)<sub>2</sub>}<sub>3</sub>)]**, 1-U.** A cold (-40 °C) orange-yellow solution of **A** (34.0 mg, 0.0684 mmol, 1 equiv) in toluene (1.0 mL) was added to cold (-40 °C) dark purple toluene solution (1.5 mL) of [U<sup>III</sup>{N(SiMe<sub>3</sub>)<sub>2</sub>}<sub>3</sub>] (49.2 mg, 0.0684 mmol, 1 equiv). The reaction mixture was kept at -40 °C for 48 h. The supernatant was carefully pipetted out, affording 56.5 mg (68% yield) of analytically pure dark, crystalline material. X-ray quality crystals of **1-U** were obtained from a concentrated toluene solution at -40 °C. Anal. Calcd for [{Fe(depe)<sub>2</sub>}(μ-η<sup>1</sup>:η<sup>1</sup>-N<sub>2</sub>)(U{N(SiMe<sub>3</sub>)<sub>2</sub>}<sub>3</sub>)] C<sub>38</sub>H<sub>102</sub>FeN<sub>5</sub>P<sub>4</sub>Si<sub>6</sub>U: C: 37.55%; H: 8.46%; N: 5.76%. Found: C: 37.37%; H: 8.34%; N: 5.73%.**

<sup>1</sup>H NMR (400 MHz, d<sub>8</sub>-toluene, 233 K): δ = 2.12 (s), 1.64 (br), 1.32 (br), -4.02 (br), -5.41 (br), -6.11 (br), -7.12 (br), -11.21 (br), -12.77 (br) (Figure S5).

<sup>31</sup>P{<sup>1</sup>H} NMR (162 MHz, d<sub>8</sub>-toluene, 233 K): δ = -25.7 (br) (Figure S6).

IR spectrum (KBr pill): ν(N≡N) = 1833 cm<sup>-1</sup> (Figure S73)

**Reaction of A with [U<sup>III</sup>{N(SiMe<sub>2</sub>Ph)<sub>2</sub>]<sub>3</sub>] at -40 °C in toluene.** A cold (-40 °C) dark violet solution of [U<sup>III</sup>{N(SiMe<sub>2</sub>Ph)<sub>2</sub>]<sub>3</sub>] (11.4 mg, 0.0104 mmol, 1 equiv) in d<sub>8</sub>-toluene (0.6 mL) was added to orange solid **A** (5.2 mg, 0.0104 mmol, 1 equiv) under Ar at -40 °C, resulting in a dark solution. The <sup>31</sup>P{<sup>1</sup>H} NMR spectrum at -40 °C of the reaction mixture (Figure S10) shows a sharp resonance at δ = 84.5 ppm (s) corresponding to **A**. However, increasing the temperature up to 50 °C led to gradual broadening of the <sup>31</sup>P resonance, suggestive of an interaction with the paramagnetic U center.

**Synthesis of [{Fe(depe)<sub>2</sub>}(μ-η<sup>1</sup>:η<sup>1</sup>-N<sub>2</sub>)(U{ODtbp}<sub>3</sub>)], **2**.** A cold (-40 °C) orange-yellow solution of **A** (15.0 mg, 0.0302 mmol, 1 equiv) in toluene (1.5 mL) was added to cold (-40 °C) yellow-brown solution of [U<sup>III</sup>(ODtbp)<sub>3</sub>] (25.2 mg, 0.0684 mmol, 1 equiv) in toluene (2.5 mL) under Ar. The resulting dark brown-red reaction mixture was left to react for 1 h under stirring at -40 °C. All volatiles were removed under vacuum and the solid was dissolved in Et<sub>2</sub>O (0.8 mL). X-ray quality dark brown-red crystals of **2** were obtained by leaving it stand for 12 h at -40 °C, in 76.5% yield (31.2 mg).

Anal. Calcd for [{Fe(depe)<sub>2</sub>}(μ-η<sup>1</sup>:η<sup>1</sup>-N<sub>2</sub>)(U(O-2,6-<sup>t</sup>Bu<sub>2</sub>C<sub>6</sub>H<sub>3</sub>)<sub>3</sub>)] C<sub>62</sub>H<sub>111</sub>FeN<sub>2</sub>O<sub>3</sub>P<sub>4</sub>U: C: 55.15%; H: 8.29%; N: 2.07%. Found: C: 54.97%; H: 8.29%; N: 1.74%.

<sup>1</sup>H NMR (400 MHz, d<sub>8</sub>-toluene, 233 K): δ = 19.86 (s, 6H), 16.13 (s, 3H), -2.53 (s, br, 48H), -4.86 (s, 18H), -5.10 (s, 8H), -5.46 (s, 12 H), -6.37 (s, 4H), -6.63 (s, 4H), -10.93 (s, 4H), -11.9 (s, 4H). (Figure S12)

<sup>31</sup>P{<sup>1</sup>H} NMR (162 MHz, d<sub>8</sub>-toluene, 233 K): δ = -17.9 (s) (Figure S13)

IR spectrum (KBr pill): ν(N≡N) = 1820 cm<sup>-1</sup> (Figure S74)

**Reaction of A with [U<sup>III</sup>(OTtbp)<sub>3</sub>] at -40 °C in toluene.** A d<sub>8</sub>-toluene (0.6 mL) solution of crystalline [U(OTtbp)<sub>3</sub>]<sub>2</sub>(μ-η<sup>2</sup>:η<sup>2</sup>-N<sub>2</sub>) (16.8 mg, 0.0081 mmol, 0.5 equiv) was heated to 80 °C and exposed to vacuum to remove N<sub>2</sub> and yield [U<sup>III</sup>(OTtbp)<sub>3</sub>]. Addition of orange solid **A** (8.0 mg, 0.0162 mmol, 1 equiv) to this solution under Ar at -40 °C resulted in a dark brown-red solution. The <sup>31</sup>P{<sup>1</sup>H} NMR spectrum at -40 °C of the reaction mixture (Figure S17) shows a sharp resonance at δ = 84.5 ppm (s) corresponding to **A**, and a second broad resonance at δ = -15.7 ppm, suggesting the formation of an adduct. The <sup>1</sup>H NMR spectrum of the reaction mixture at -40 °C (Figure S18) shows a pattern reminiscent of that observed for **2**, further suggesting that the formation of an adduct is occurring. The <sup>31</sup>P{<sup>1</sup>H} NMR spectrum at 25 °C of the reaction mixture (Figure S19) shows a broad resonance at δ = 8.7 ppm, suggesting an equilibrium between the starting materials and the expected adducts, as observed for both **1-U** and **2**. However, due to the higher solubility of the complexes in toluene and hexane, nothing could be crystallized from this reaction mixture.

**Synthesis of [{Fe(depe)<sub>2</sub>}(μ-η<sup>1</sup>:η<sup>1</sup>-N<sub>2</sub>)(Ce{N(SiMe<sub>3</sub>)<sub>2</sub>]<sub>3</sub>], **1-Ce**.** A yellow solution of [Ce<sup>III</sup>{N(SiMe<sub>3</sub>)<sub>2</sub>]<sub>3</sub>] (35.5 mg, 0.0571 mmol, 1 equiv) in toluene (0.9 mL) was added an orange-yellow solution of **A** (28.4 mg, 0.0572 mmol, 1 equiv) in toluene (0.6 mL) under Ar at 25 °C, resulting in a dark orange-red solution. X-ray quality orange-red crystals of **1-Ce** were obtained by leaving it stand for 12 h at -40 °C, in 83% yield (53.0 mg).

Anal. Calcd for [{Fe(depe)<sub>2</sub>}(μ-η<sup>1</sup>:η<sup>1</sup>-N<sub>2</sub>)(Ce{N(SiMe<sub>3</sub>)<sub>2</sub>]<sub>3</sub>)] C<sub>38</sub>H<sub>102</sub>FeN<sub>5</sub>P<sub>4</sub>Si<sub>6</sub>Ce: C: 40.84%; H: 9.20%; N: 6.27%. Found: C: 40.74%; H: 9.12%; N: 6.03%.

<sup>1</sup>H NMR (400 MHz, d<sub>8</sub>-toluene, 233 K): δ = -0.59 (s), -0.79 (s), -1.10 (s), -1.28 (s), -1.69 (br) (Figure S21).

<sup>31</sup>P{<sup>1</sup>H} NMR (162 MHz, d<sub>8</sub>-toluene, 233 K): δ = 73.8 (s) (Figure S24).

IR spectrum (KBr pill): ν(N≡N) = 1849 cm<sup>-1</sup> (Figure S76).

**Synthesis of [{Fe(depe)<sub>2</sub>}(μ-η<sup>1</sup>:η<sup>1</sup>-N<sub>2</sub>)(Sm{N(SiMe<sub>3</sub>)<sub>2</sub>]<sub>3</sub>], **1-Sm**.** An orange-yellow solution of **A** (33.6 mg, 0.0676 mmol, 1 equiv) in toluene (0.6 mL) was added to an off-white suspension of [Sm<sup>III</sup>{N(SiMe<sub>3</sub>)<sub>2</sub>]<sub>3</sub>] (42.7 mg, 0.0676 mmol, 1 equiv) in toluene (0.5 mL) under Ar at 25 °C, resulting in a red-orange solution. X-ray quality yellow-orange crystals of **1-Sm** were obtained by leaving it stand for 2 days at -40 °C, in 77% yield (59.0 mg).

Anal. Calcd for [{Fe(depe)<sub>2</sub>}(μ-η<sup>1</sup>:η<sup>1</sup>-N<sub>2</sub>)(Sm{N(SiMe<sub>3</sub>)<sub>2</sub>]<sub>3</sub>)] C<sub>38</sub>H<sub>102</sub>FeN<sub>5</sub>P<sub>4</sub>Si<sub>6</sub>Sm: C: 40.47%; H: 9.12%; N: 6.21%. Found: C: 40.79%; H: 9.28%; N: 6.04%.

<sup>1</sup>H NMR (400 MHz, d<sub>8</sub>-toluene, 233 K): δ = 8.83 (br), 1.24, 1.03 (s), 0.89 (s), 0.63 (s), -0.45 (s) (Figure S27).

<sup>31</sup>P{<sup>1</sup>H} NMR (162 MHz, d<sub>8</sub>-toluene, 233 K): δ = 81.3 (s) (Figure S29).

IR spectrum (KBr pill):  $\nu(\text{N}\equiv\text{N}) = 1842 \text{ cm}^{-1}$  (Figure S77).

**Synthesis of  $[\{\text{Fe}(\text{depe})_2\}(\mu\text{-}\eta^1\text{:}\eta^1\text{-N}_2)(\text{Dy}\{\text{N}(\text{SiMe}_3)_2\}_3)]$ , **1-Dy**.** An orange-yellow solution of **A** (38.0 mg, 0.0766 mmol, 1 equiv) in toluene (1.5 mL) was added to a colorless solution of  $[\text{Dy}^{\text{III}}\{\text{N}(\text{SiMe}_3)_2\}_3]$  (49.3 mg, 0.0766 mmol, 1 equiv) in toluene (1.5 mL) under Ar at 25 °C, resulting in a red-orange solution. X-ray quality yellow-orange crystals of **1-Dy** were obtained by leaving it stand for 24 h at -40 °C, in 87% yield (76.0 mg). Anal. Calcd for  $[\{\text{Fe}(\text{depe})_2\}(\mu\text{-}\eta^1\text{:}\eta^1\text{-N}_2)(\text{Dy}\{\text{N}(\text{SiMe}_3)_2\}_3)]$   $\text{C}_{38}\text{H}_{102}\text{FeN}_5\text{P}_4\text{Si}_6\text{Dy}$ : C: 40.04%; H: 9.02%; N: 6.14%. Found: C: 39.81%; H: 8.86%; N: 5.73%.

$^1\text{H}$  NMR (400 MHz,  $d_8$ -toluene, 298 K): 0.53 (s) ppm, -99.90 (br) (Figure S31).

$^{31}\text{P}\{^1\text{H}\}$  NMR (162 MHz,  $d_8$ -toluene, 298 K):  $\delta = 82.1$  (s) (Figure S33).

IR spectrum (KBr pill):  $\nu(\text{N}\equiv\text{N}) = 1839 \text{ cm}^{-1}$  (Figure S79).

**Synthesis of  $[\{\text{Fe}(\text{depe})_2\}(\mu\text{-}\eta^1\text{:}\eta^1\text{-N}_2)(\text{Tm}\{\text{N}(\text{SiMe}_3)_2\}_3)]$ , **1-Tm**.** An orange-yellow solution of **A** (32.8 mg, 0.07 mmol, 1 equiv) in toluene (0.6 mL) was added to an off-white suspension of  $[\text{Tm}^{\text{III}}\{\text{N}(\text{SiMe}_3)_2\}_3]$  (42.9 mg, 0.07 mmol, 1 equiv) in toluene (0.6 mL) under Ar at 25 °C, resulting in a red-orange solution. The reaction mixture was swirled/agitated a few times to ensure proper mixing of reactants. The volatiles were then removed under vacuum and the reaction mixture was redissolved in hexane (5 mL) and placed at -40 °C for 1 day. A red crystalline solid formed that was collected and washed with cold (-40 °C) hexane (3 x 0.2 mL). The red solid obtained was dried under vacuum to yield **1-Tm** in 42 % yield (32.1 mg). X-ray quality red-orange crystals suitable for diffraction of **1-Tm** were obtained by leaving the reaction mixture in hexane stand for 1 day at -40 °C.

Anal. Calcd for  $[\{\text{Fe}(\text{depe})_2\}(\mu\text{-}\eta^1\text{:}\eta^1\text{-N}_2)(\text{Tm}\{\text{N}(\text{SiMe}_3)_2\}_3)]$   $\text{C}_{38}\text{H}_{102}\text{FeN}_5\text{P}_4\text{Si}_6\text{Tm}$ : C: 39.81%; H: 8.97%; N: 6.11%. Found: C: 39.83%; H: 9.00%; N: 5.51%.

$^1\text{H}$  NMR (400 MHz,  $d_8$ -toluene, 298 K):  $\delta = 73.82$  (br), 1.85, 1.63, 1.18, 0.85 (Figure S35).

$^{31}\text{P}\{^1\text{H}\}$  NMR (162 MHz,  $d_8$ -toluene, 298 K):  $\delta = 84.2$  (br) (Figure S36).

IR spectrum (KBr pill):  $\nu(\text{N}\equiv\text{N}) = 1837 \text{ cm}^{-1}$  (Figure S80).

**Synthesis of  $[\{\text{Fe}(\text{depe})_2\}(\mu\text{-}\eta^1\text{:}\eta^1\text{-N}_2)(\text{Yb}\{\text{N}(\text{SiMe}_3)_2\}_2(\text{OEt})_{0.5}(\text{THF})_{0.5})]$ , **1\*-Yb**.** A cold (-40 °C) orange-yellow solution of **A** (33.5 mg, 0.0674 mmol, 1 equiv) in toluene (1.0 mL) was added to an orange solution of  $[\text{Sm}^{\text{II}}\{\text{N}(\text{SiMe}_3)_2\}_2(\text{thf})_2]$  (43.1 mg, 0.0676 mmol, 1 equiv) in toluene (2.5 mL) under Ar at 25 °C, resulting in a red-orange solution. Volatiles were removed under vacuum and the resultant red-orange solid was dissolved in  $\text{Et}_2\text{O}$  (0.4 mL). X-ray quality red-orange crystals of **1\*-Yb** were obtained by leaving it stand for 12 h at -40 °C, in 73% yield (52.5 mg).

Anal. Calcd for  $[\{\text{Fe}(\text{depe})_2\}(\mu\text{-}\eta^1\text{:}\eta^1\text{-N}_2)(\text{Yb}\{\text{N}(\text{SiMe}_3)_2\}_2(\text{OEt})_{0.5}(\text{THF})_{0.5})]$   $\text{C}_{36}\text{H}_{91}\text{FeN}_4\text{P}_4\text{Si}_4\text{Yb}$ : C: 40.67%; H: 8.82%; N: 5.27%. Found: C: 40.54%; H: 8.55%; N: 5.29%.

$^1\text{H}$  NMR (400 MHz,  $d_8$ -toluene, 233 K):  $\delta = 1.35$  (br), 1.17 (br), 1.02 (br), 0.80 (br), 0.52 (s) (Figure S37).

$^{31}\text{P}\{^1\text{H}\}$  NMR (162 MHz,  $d_8$ -toluene, 233 K):  $\delta = 81.2$  (s) (Figure S39).

IR spectrum (KBr pill):  $\nu(\text{N}\equiv\text{N}) = 1874 \text{ cm}^{-1}$  (Figure S78).

**Synthesis of  $[\{\text{Fe}(\text{depe})_2\}(\mu\text{-}\eta^1\text{:}\eta^1\text{-N}_2)(\text{Sm}\{\text{N}(\text{SiMe}_3)_2\}_2)]$ , **1\*-Sm**.** An orange-yellow solution of **A** (90.1 mg, 0.182 mmol, 2 equiv) in hexane (3.0 mL) was added to a cold (-40 °C) dark violet solution of  $[\text{Sm}^{\text{II}}\{\text{N}(\text{SiMe}_3)_2\}_2]$  (85.5 mg, 0.0907 mmol, 1 equiv) in hexane (3.0 mL) under Ar at -40 °C, resulting in a dark brown-yellow solution. X-ray quality dark brown-green crystals of **1\*-Sm** were obtained by slow evaporation of a saturated hexane solution over the course of 12 hs at -40 °C, in 83.6% yield (146.8 mg).

Anal. Calcd for  $[\{\text{Fe}(\text{depe})_2\}(\mu\text{-}\eta^1\text{:}\eta^1\text{-N}_2)(\text{Sm}\{\text{N}(\text{SiMe}_3)_2\}_2)]$   $\text{C}_{32}\text{H}_{84}\text{FeN}_4\text{P}_4\text{Si}_4\text{Sm}$ : C: 39.73%; H: 8.75%; N: 5.79%. Found: C: 39.54%; H: 8.66%; N: 5.52%.

$^1\text{H}$  NMR (400 MHz,  $\text{C}_6\text{D}_{12}$ , 298 K):  $\delta = 2.57$  (s), 1.07 (br), 0.61 (br), 0.16 (br) (Figure S42).

$^{31}\text{P}\{^1\text{H}\}$  NMR (162 MHz,  $\text{C}_6\text{D}_{12}$ , 298 K):  $\delta = 110.9$  (br) (Figure S43)

Multinuclear NMR spectroscopy (Figures S44 and S45) shows the slow decomposition of **1\*-Sm** in cyclohexane solution at 25 °C over the course of 24 h. The formation of **1-Sm** over the course of 1 week was confirmed by measurement of single crystals.

$^1\text{H}$  NMR (400 MHz,  $d_8$ -toluene, 233 K):  $\delta$  = 7.28 (br), 1.22 (s), 0.53 (s), -0.11 (s), -1.44 (s), -2.22 (br), -4.06 (br) (Figure S46).

$^{31}\text{P}\{^1\text{H}\}$  NMR (162 MHz,  $d_8$ -toluene, 233 K):  $\delta$  = 113.3 (s) (Figure 48)

Multinuclear NMR spectroscopy (Figures S50 and S51) shows the slow disappearance of **1\*-Sm** in toluene solution at -40 °C over the course of several days, with concomitant formation of **3** (Scheme S1), probably due to disproportionation of “[Sm<sup>II</sup>{N(SiMe<sub>3</sub>)<sub>2</sub>}]<sub>2</sub>” into Sm(III) and Sm(0).

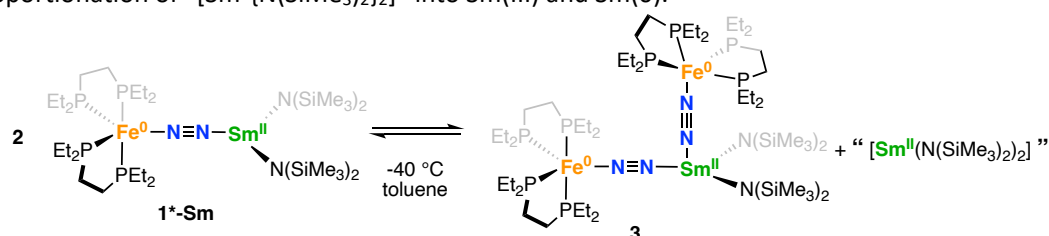

**Scheme S1:** Equilibrium observed upon dissolution of **1\*-Sm** in toluene at -40 °C

IR spectrum (KBr pill):  $\nu(\text{N}\equiv\text{N}) = 1888 \text{ cm}^{-1}$  (Figure S81)

**Reaction of A with [Sm<sup>II</sup>{N(SiMe<sub>3</sub>)<sub>2</sub>}]<sub>2</sub> at -40 °C in toluene.** A cold (-40 °C) dark violet solution of [Sm<sup>II</sup>{N(SiMe<sub>3</sub>)<sub>2</sub>}]<sub>2</sub> (9.4 mg, 0.010 mmol, 1 equiv) in  $d_8$ -toluene (0.4 mL) was added to orange solid **A** (9.9 mg, 0.02 mmol, 2 equiv) under Ar at -40 °C, resulting in a dark brown-green solution. The  $^{31}\text{P}\{^1\text{H}\}$  NMR spectrum at -40 °C of the reaction mixture (Figure S53) shows a sharp resonance at  $\delta = 125.0$  ppm (s), that suggest the formation of a new species, different to **1-Sm** and **A** together with two broad resonances at  $\delta = 112$  ppm (s) and some **1-Sm**. The  $^1\text{H}$  NMR spectrum also suggest the formation of a new species (Figure S52) with 3 broad resonances at  $\delta = 6.37$  ppm (br), 2.55 ppm (br) and 1.15 ppm (br), together with two sharp resonances at  $\delta = 0.85$  ppm (s) and -0.87 ppm. Isolation attempts resulted only in the crystallization of the Sm(III) species, **1-Sm** and [Sm<sup>III</sup>{N(SiMe<sub>3</sub>)<sub>2</sub>}]<sub>3</sub>, suggesting the ligand scrambling and oxidation upon decomposition of the species observed in the multinuclear NMR spectra.

**Synthesis of [({Fe(depe)<sub>2</sub>})( $\mu$ - $\eta^1$ : $\eta^1$ -N<sub>2</sub>)]<sub>2</sub>(Sm{N(SiMe<sub>3</sub>)<sub>2</sub>})<sub>2</sub>], **3**.** An orange-yellow solution of **A** (134.6 mg, 0.271 mmol, 4 equiv) in hexane (6.0 mL) was added to a cold (-40 °C) dark violet solution of [Sm<sup>II</sup>{N(SiMe<sub>3</sub>)<sub>2</sub>}]<sub>2</sub> (63.8 mg, 0.0677 mmol, 1 equiv) in hexane (3.9 mL) under Ar at -40 °C, resulting in a dark brown-yellow solution. Dark green solid precipitated out of the reaction mixture over the course of 2 h. The solid was recovered by filtration and washed with minimal cold (-40 °C) hexane, giving **3** in 70% yield (139 mg). X-ray quality dark green crystals of **3** were obtained by slow evaporation of a saturated hexane solution over the course of 12 h at -40 °C

Anal. Calcd for [({Fe(depe)<sub>2</sub>})( $\mu$ - $\eta^1$ : $\eta^1$ -N<sub>2</sub>)]<sub>2</sub>(Sm{N(SiMe<sub>3</sub>)<sub>2</sub>})<sub>2</sub>] C<sub>55</sub>H<sub>139</sub>Fe<sub>2</sub>N<sub>6</sub>P<sub>8</sub>Si<sub>4</sub>Sm: C: 43.53%; H: 9.13%; N: 5.21%. Found: C: 43.84; H: 9.30%; N: 5.58%.

$^1\text{H}$  NMR (400 MHz, C<sub>6</sub>D<sub>12</sub>, 298 K):  $\delta$  = 2.16 (br), 1.65 (br), 1.33(br), 1.19 (s) (Figure S54).

$^{31}\text{P}\{^1\text{H}\}$  NMR (162 MHz, C<sub>6</sub>D<sub>12</sub>, 298 K):  $\delta$  = 103.56 (br) (Figure S55)

$^1\text{H}$  NMR (400 MHz,  $d_8$ -toluene, 233 K):  $\delta$  = 6.34 (br), 2.58 (br), 1.35 (br), 1.15 (s) (Figure S58).

$^{31}\text{P}\{^1\text{H}\}$  NMR (162 MHz,  $d_8$ -toluene, 233 K):  $\delta$  = 125.25 (s) (Figure S60)

Multinuclear NMR spectroscopy shows the slow decomposition of **3** in cyclohexane solution at 25 °C over the course of 24 h (Figure S56 and S57). The formation of **1-Sm** over the course of 1 week was confirmed by XRD measurement of single crystals.

IR spectrum (KBr pill):  $\nu(\text{N}\equiv\text{N}) = 1888 \text{ cm}^{-1}$  and  $1896 \text{ cm}^{-1}$  (Figure S82)

## NMR Spectra

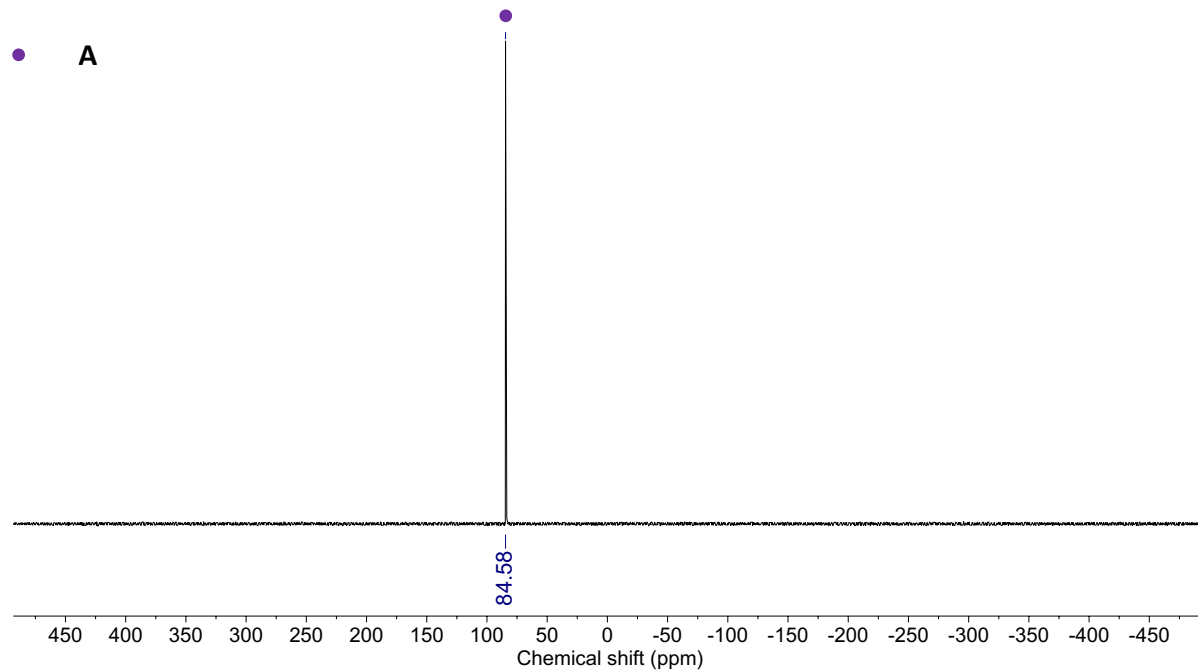

**Figure S1:**  $^{31}\text{P}\{^1\text{H}\}$  NMR spectrum (162 MHz,  $d_8$ -toluene, 233 K) of the reaction mixture obtained after addition of **A** to  $[\text{U}^{\text{III}}(\text{C}_5\text{Me}_4\text{H})_3]$  in toluene at  $-40^\circ\text{C}$  under Ar

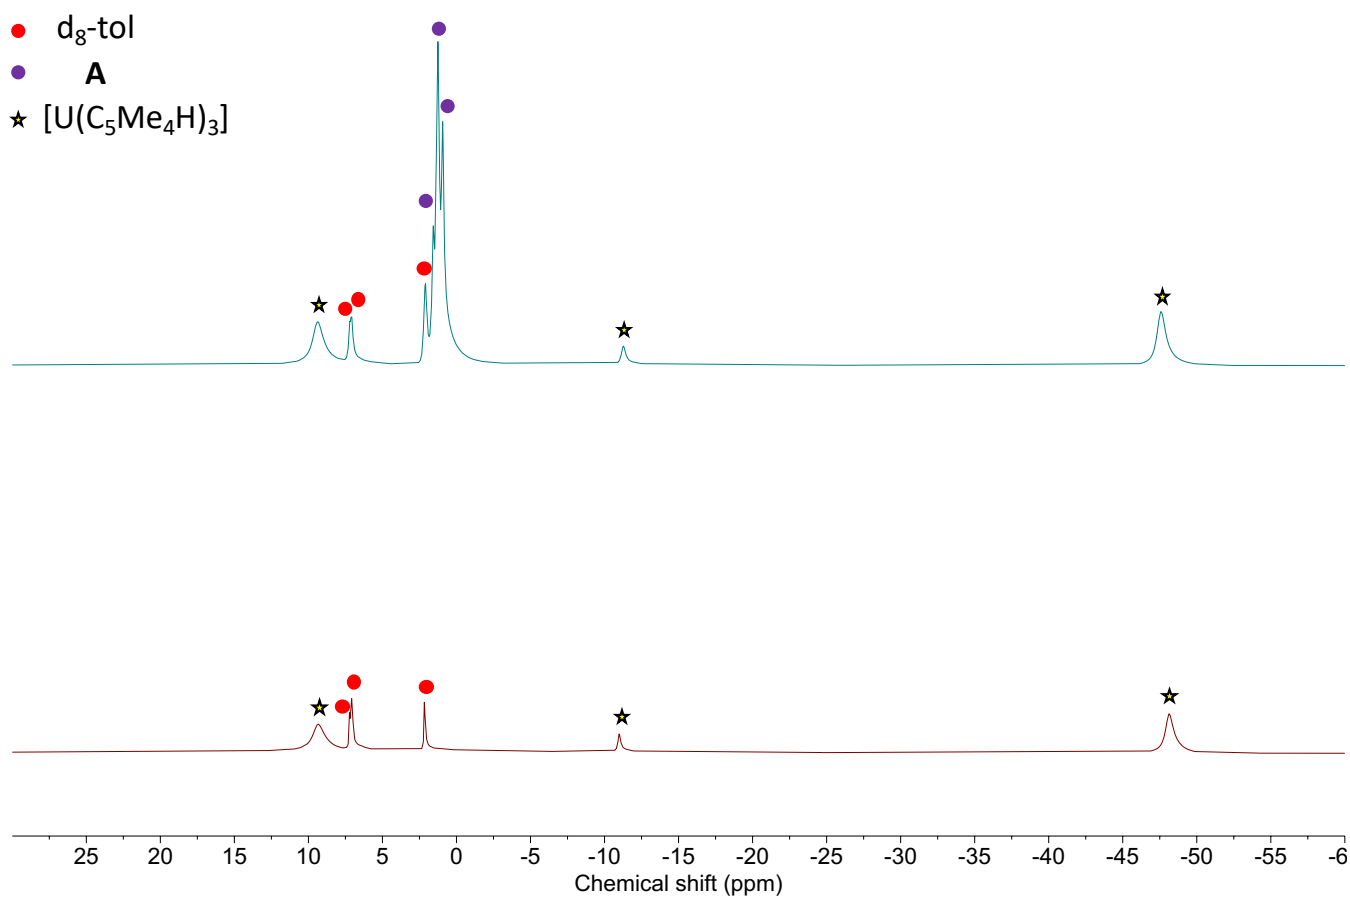

**Figure S2:** <sup>1</sup>H NMR spectra (400 MHz, d<sub>8</sub>-toluene, 233 K) comparison of the reaction mixture obtained before (bottom) and after (top) addition of **A** to [U<sup>III</sup>(C<sub>5</sub>Me<sub>4</sub>H)<sub>3</sub>] in toluene at -40 °C under Ar

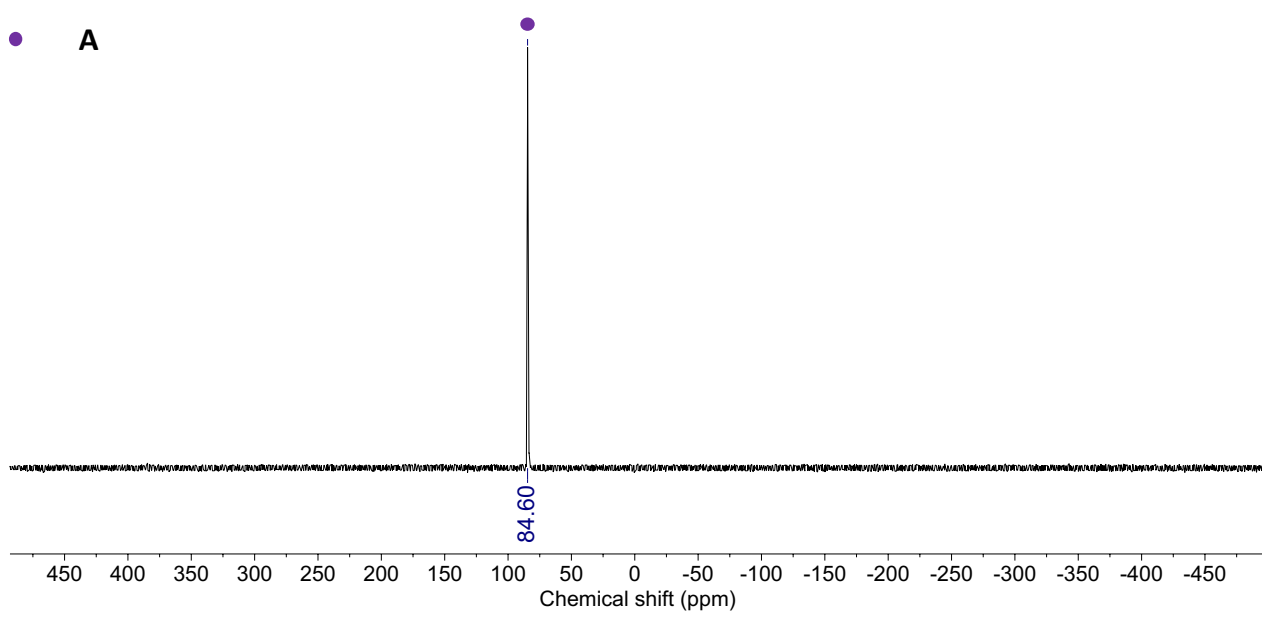

**Figure S3:** <sup>31</sup>P{<sup>1</sup>H} NMR spectrum (162 MHz, d<sub>8</sub>-toluene, 298 K) of the reaction mixture obtained after addition of **A** to [U<sup>III</sup>(C<sub>5</sub>Me<sub>4</sub>H)<sub>3</sub>] in toluene at -40 °C under Ar

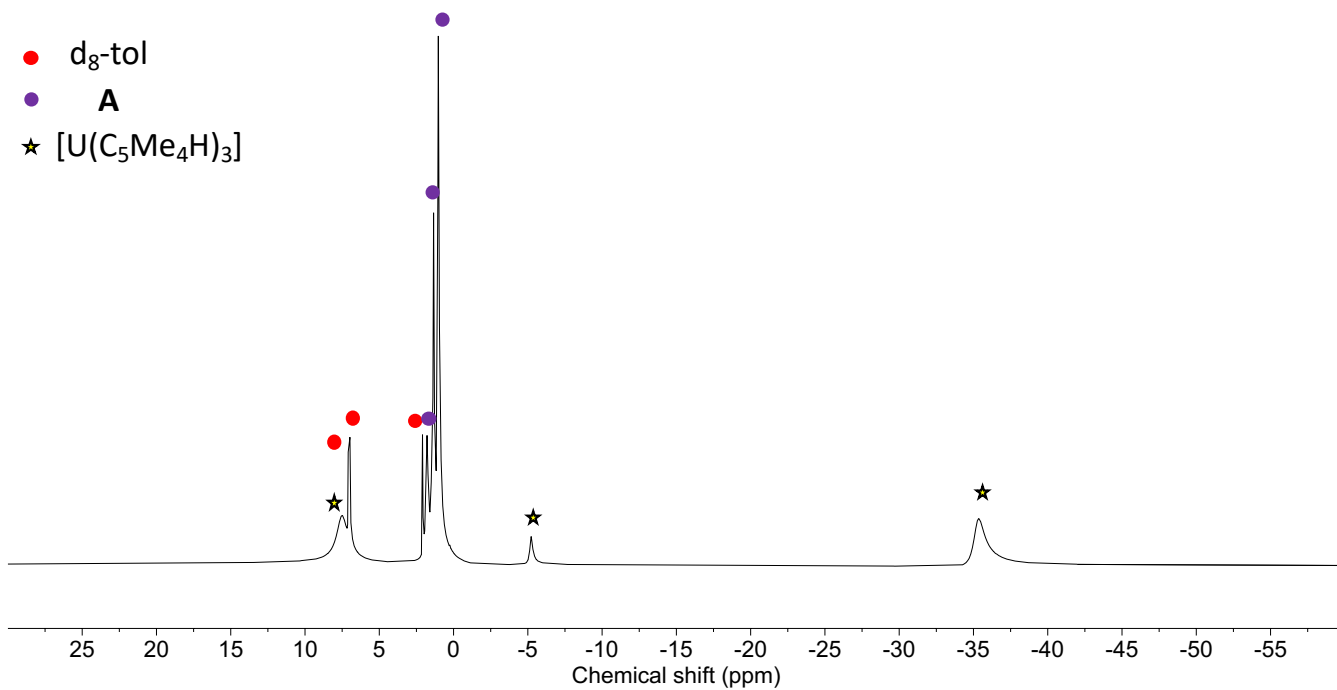

**Figure S4:**  $^1H$  NMR spectrum (400 MHz,  $d_8$ -toluene, 298 K) of the reaction mixture obtained after addition of A to  $[U^{III}(C_5Me_4H)_3]$  in toluene at  $-40^\circ C$  under Ar

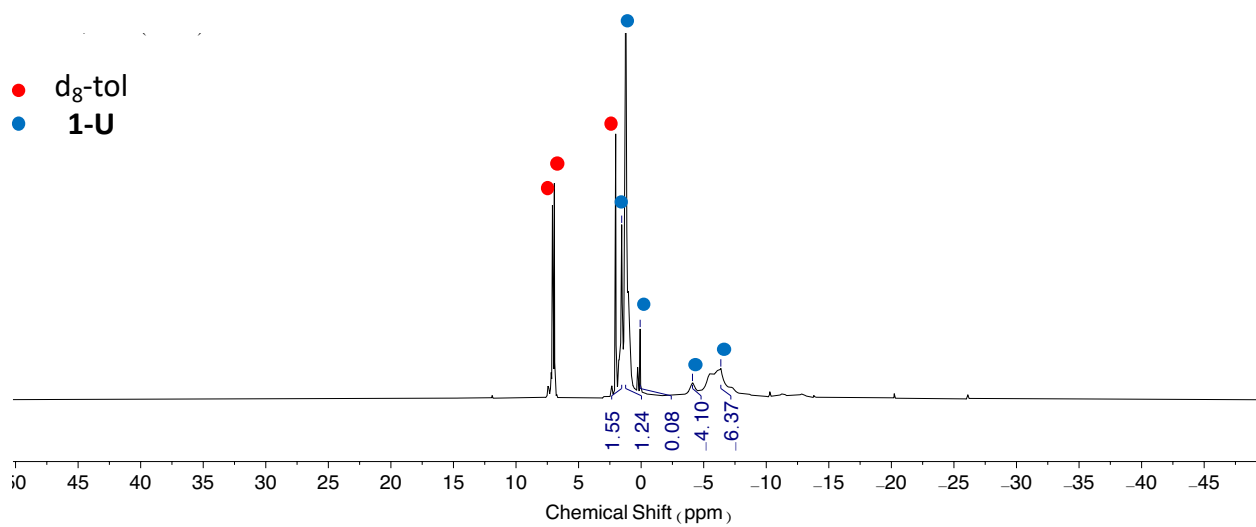

**Figure S5:**  $^1H$  NMR spectrum (400 MHz,  $d_8$ -toluene, 233 K) of crystals of 1-U.

- 1-U
- A
- Impurity

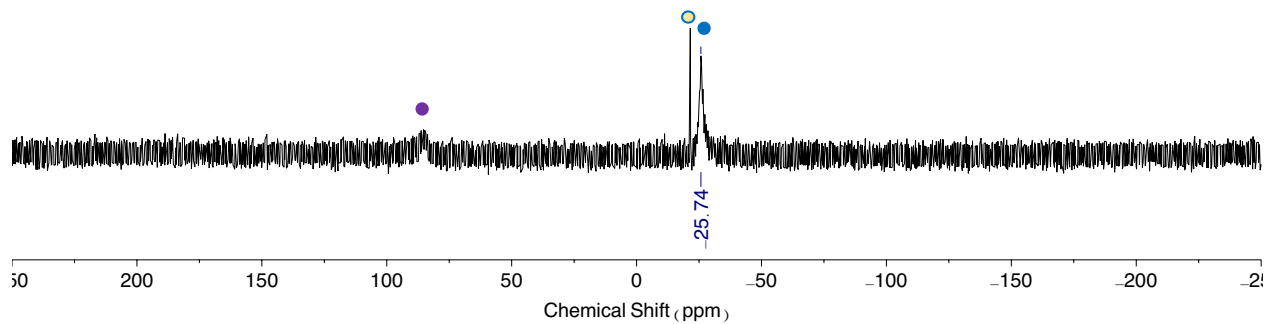

Figure S6:  $^{31}\text{P}\{^1\text{H}\}$  NMR spectrum (162 MHz,  $d_8$ -toluene, 233 K) of crystals of **1-U**.

- A
- 1-U

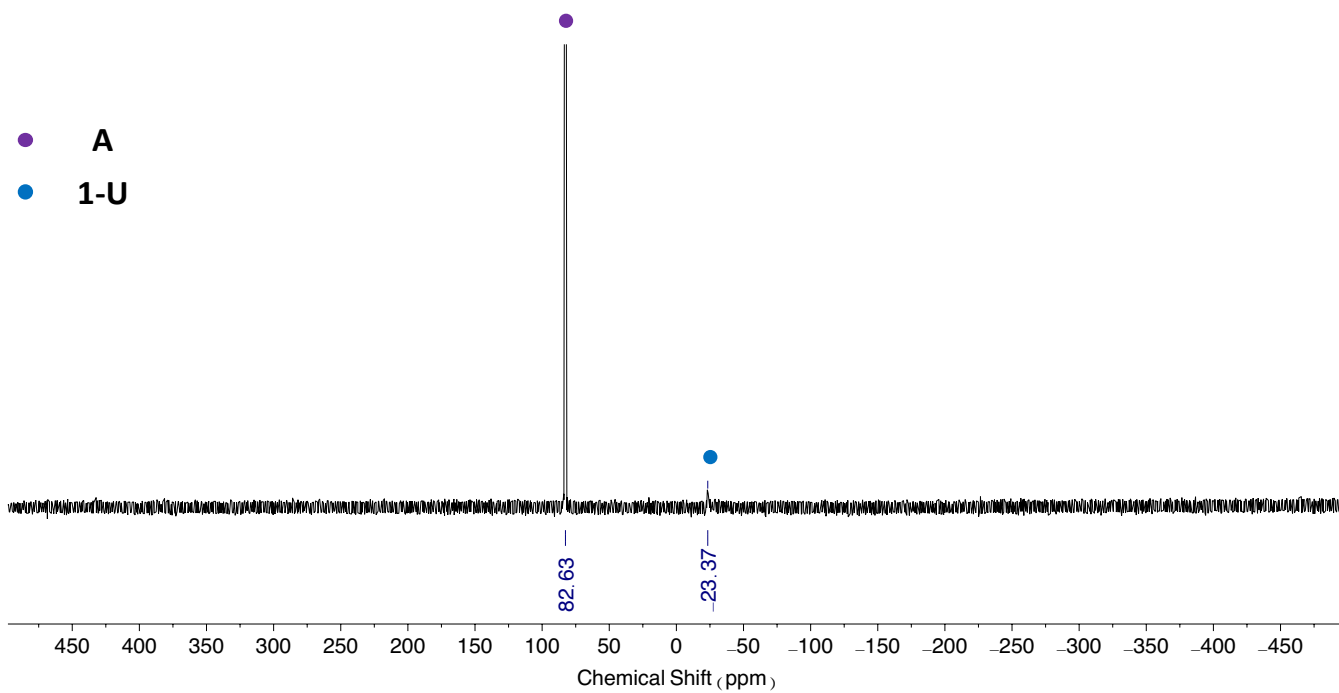

Figure S7:  $^{31}\text{P}\{^1\text{H}\}$  NMR spectrum (162 MHz,  $d_8$ -THF, 233 K) of crystals of **1-U**.



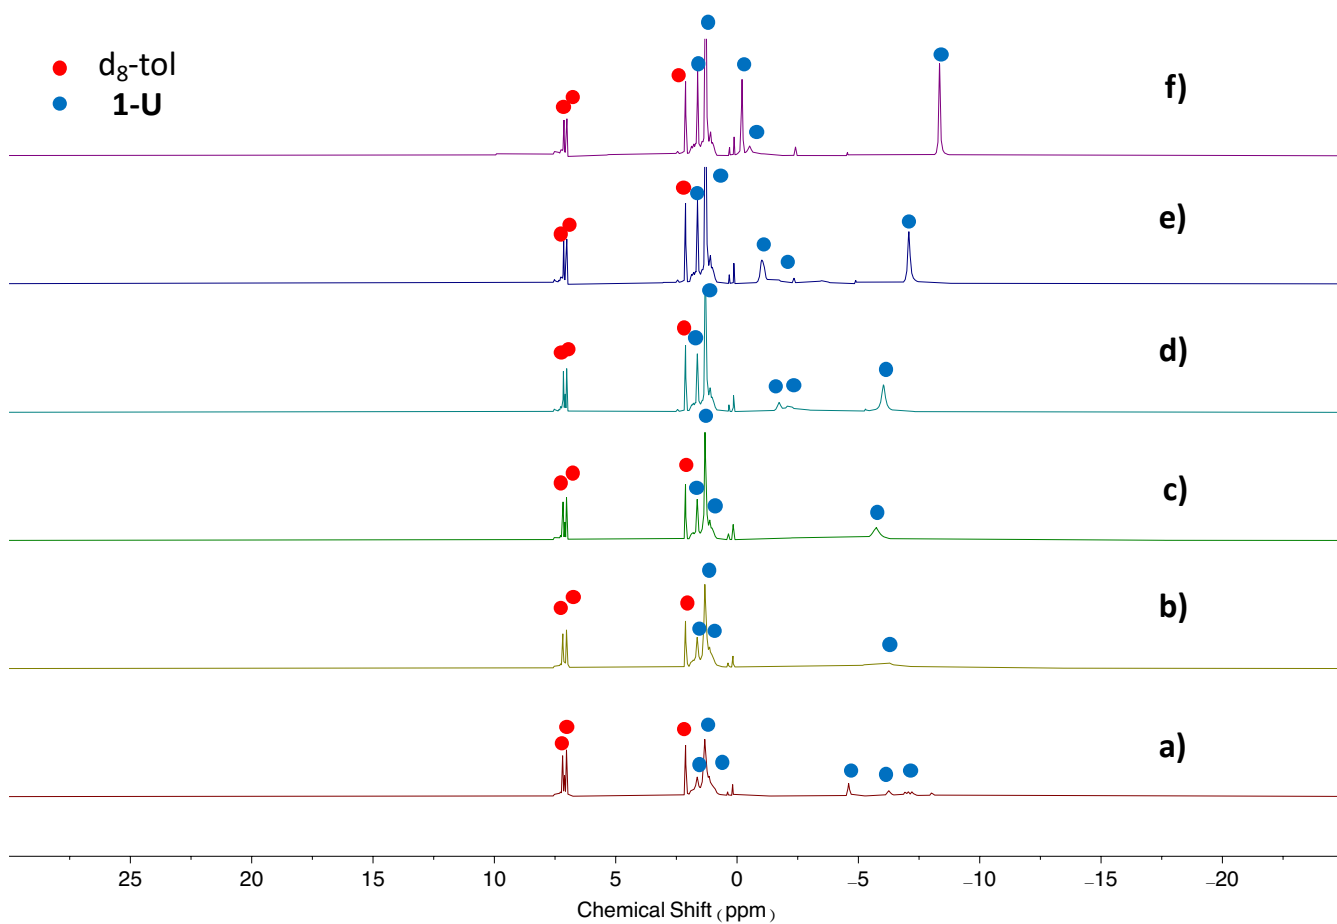

**Figure S8:** Variable temperature  $^1\text{H}$  NMR spectra (400 MHz,  $d_8$ -toluene) of crystals of **1-U**. a) 218 K, b) 233 K, c) 248 K, d) 263 K, e) 278 K, and f) 293 K.

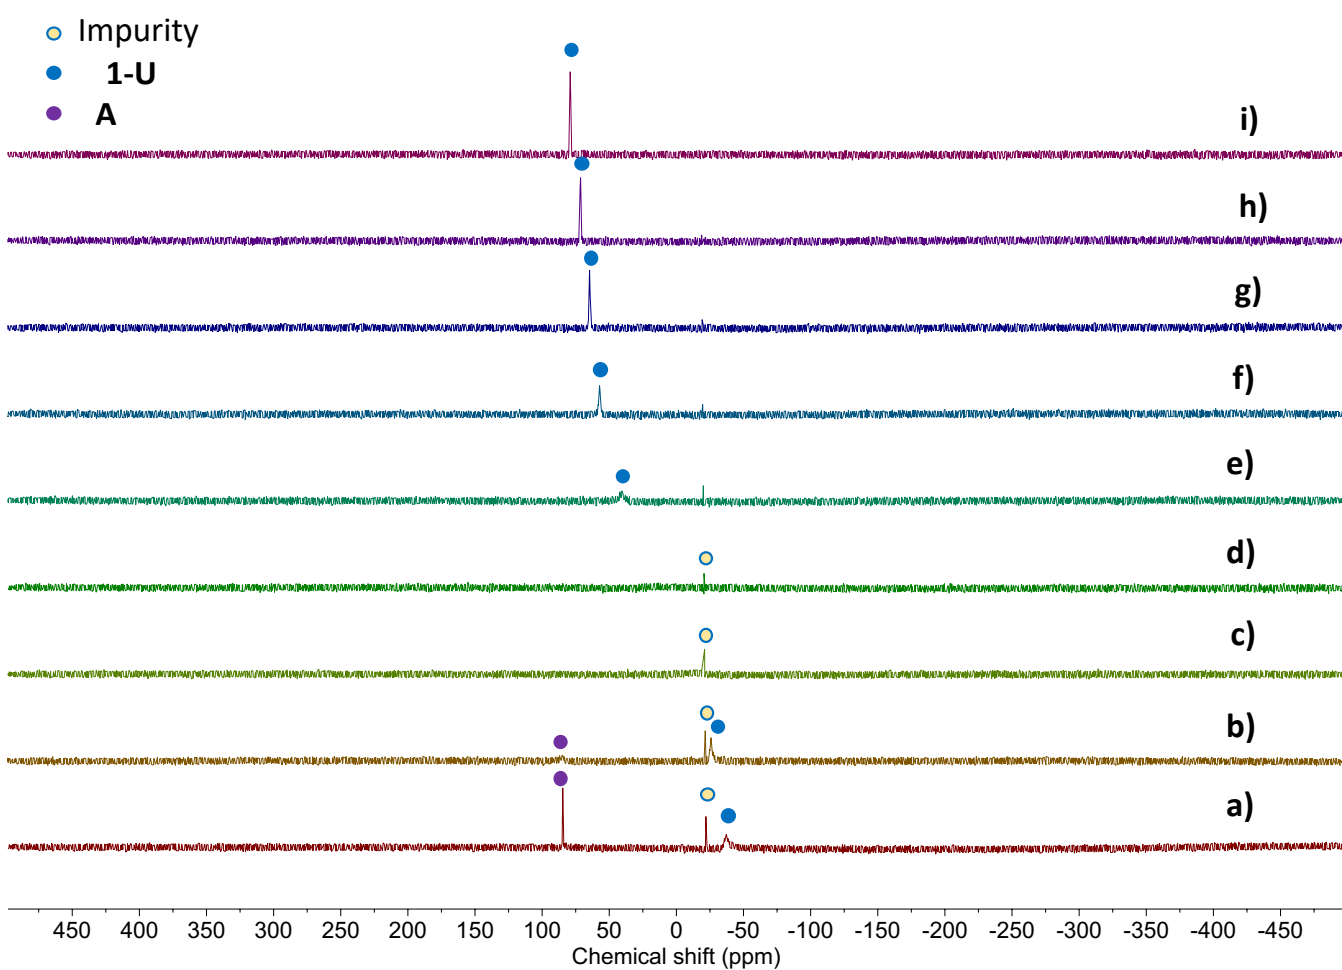

**Figure S9:** Variable temperature  $^{31}\text{P}\{^1\text{H}\}$  NMR spectra (162 MHz,  $d_8$ -toluene) of crystals of **1-U**. a) 218 K, b) 233 K, c) 248 K, d) 263 K, e) 278 K, and f) 293 K, g) 308 K, h) 323 K, and i) 338 K.

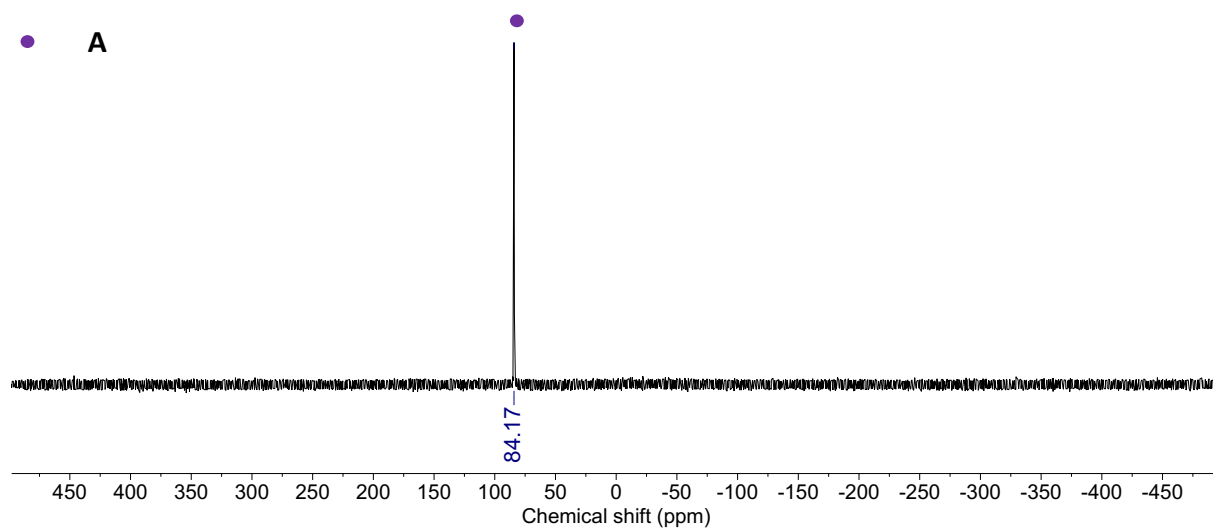

**Figure S10:**  $^{31}\text{P}\{^1\text{H}\}$  NMR spectrum (162 MHz,  $d_8$ -toluene, 233 K) of the reaction mixture obtained after addition of **A** to  $[\text{U}^{\text{III}}\{\text{N}(\text{SiMe}_2\text{Ph})_2\}_3]$  in toluene at  $-40^\circ\text{C}$  under Ar

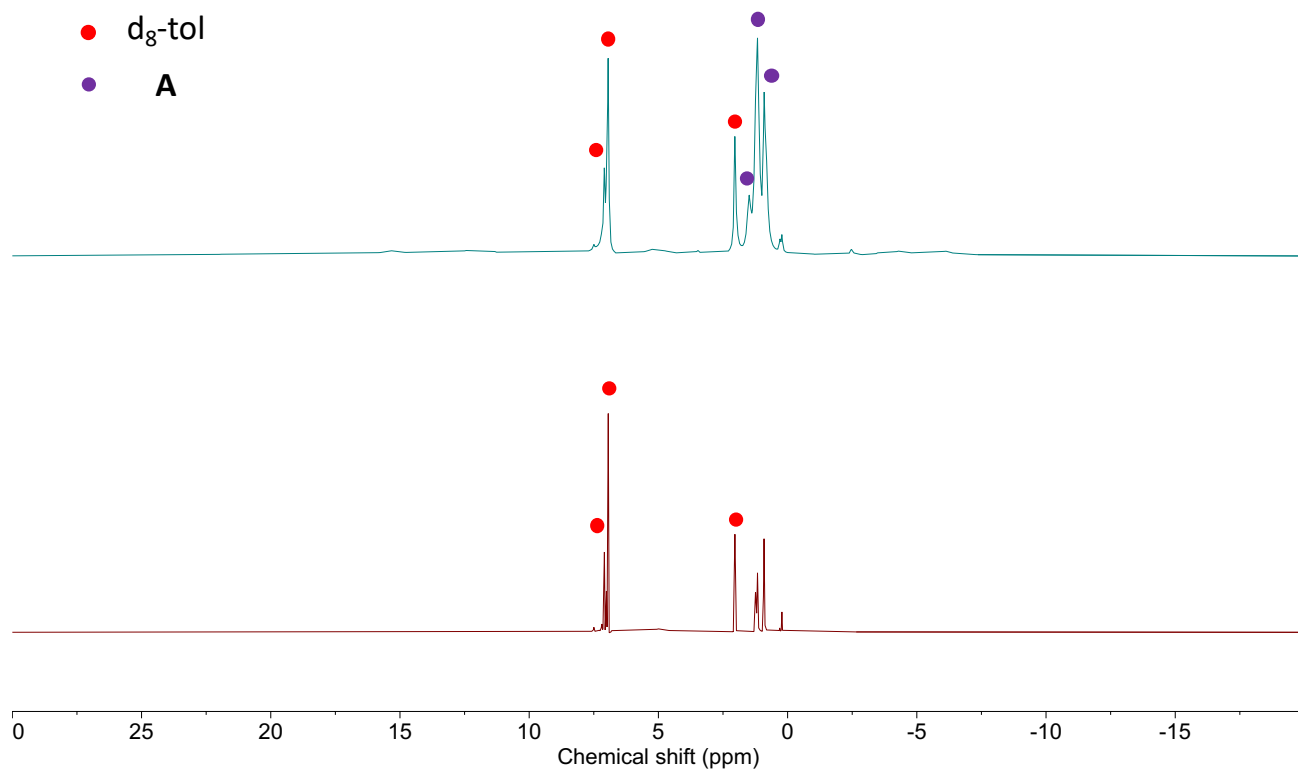

**Figure S11:**  $^1\text{H}$  NMR spectra (400 MHz,  $\text{d}_8\text{-toluene}$ , 233 K) comparison of the reaction mixture obtained before (bottom) and after (top) addition of **A** to  $[\text{U}^{\text{III}}\{\text{N}(\text{SiMe}_2\text{Ph})_2\}_3]$  in toluene at  $-40^\circ\text{C}$  under Ar

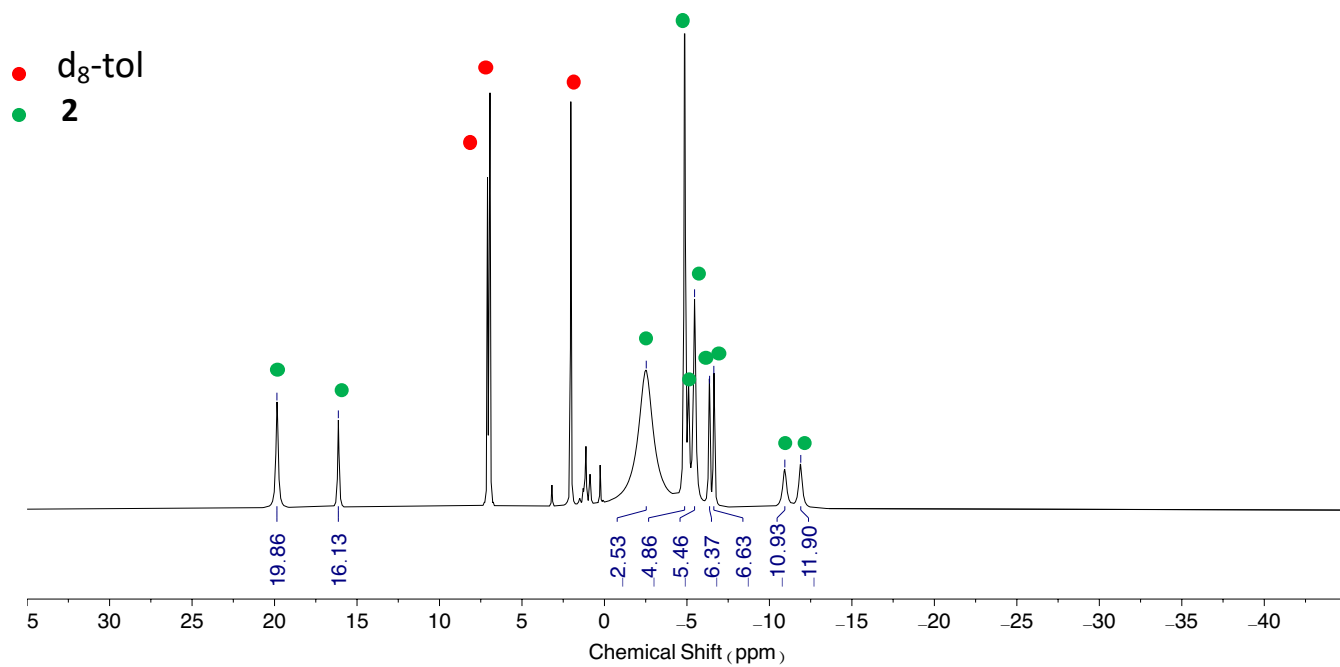

Figure S12: <sup>1</sup>H NMR spectrum (400 MHz, d<sub>8</sub>-toluene, 233 K) of crystals of 2.

● 2

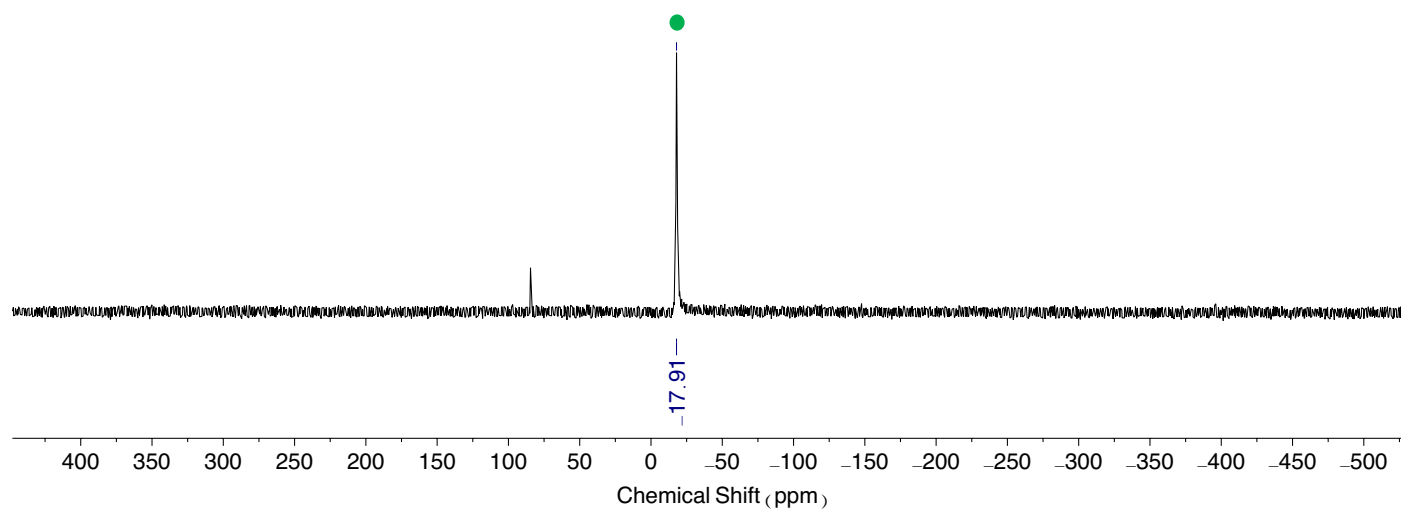

Figure S13: <sup>31</sup>P{<sup>1</sup>H} NMR spectrum (162 MHz, d<sub>8</sub>-toluene, 233 K) of crystals of 2.

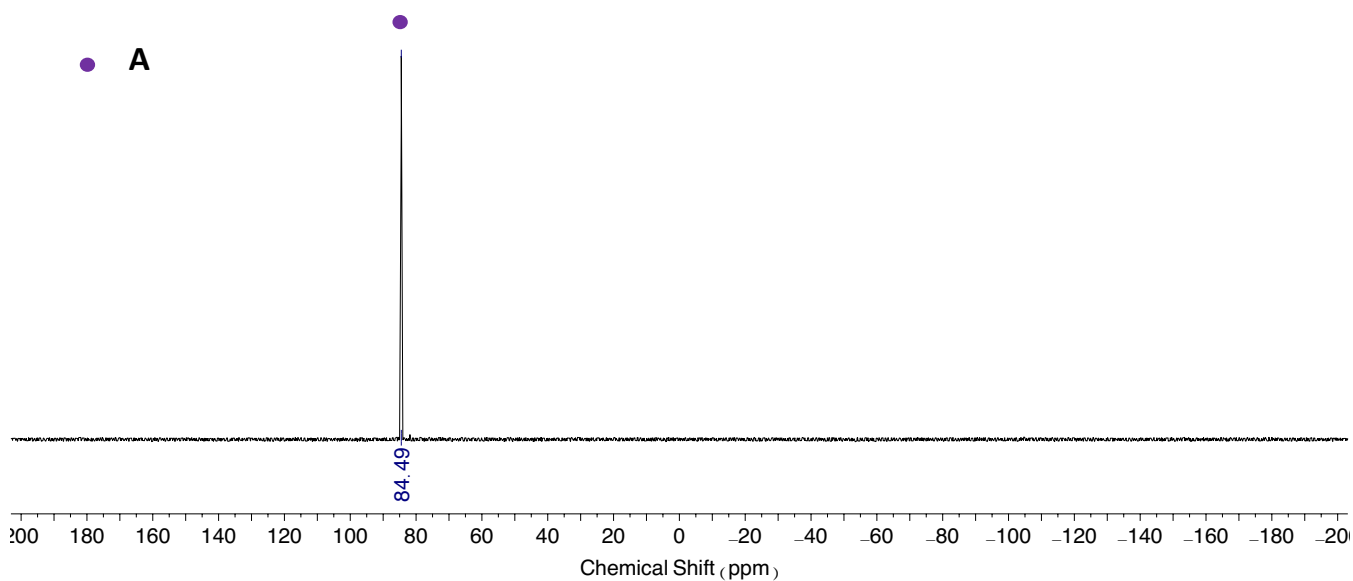

Figure S14:  $^{31}\text{P}\{^1\text{H}\}$  NMR spectrum (162 MHz,  $d_8$ -THF, 233 K) of crystals of **2**.

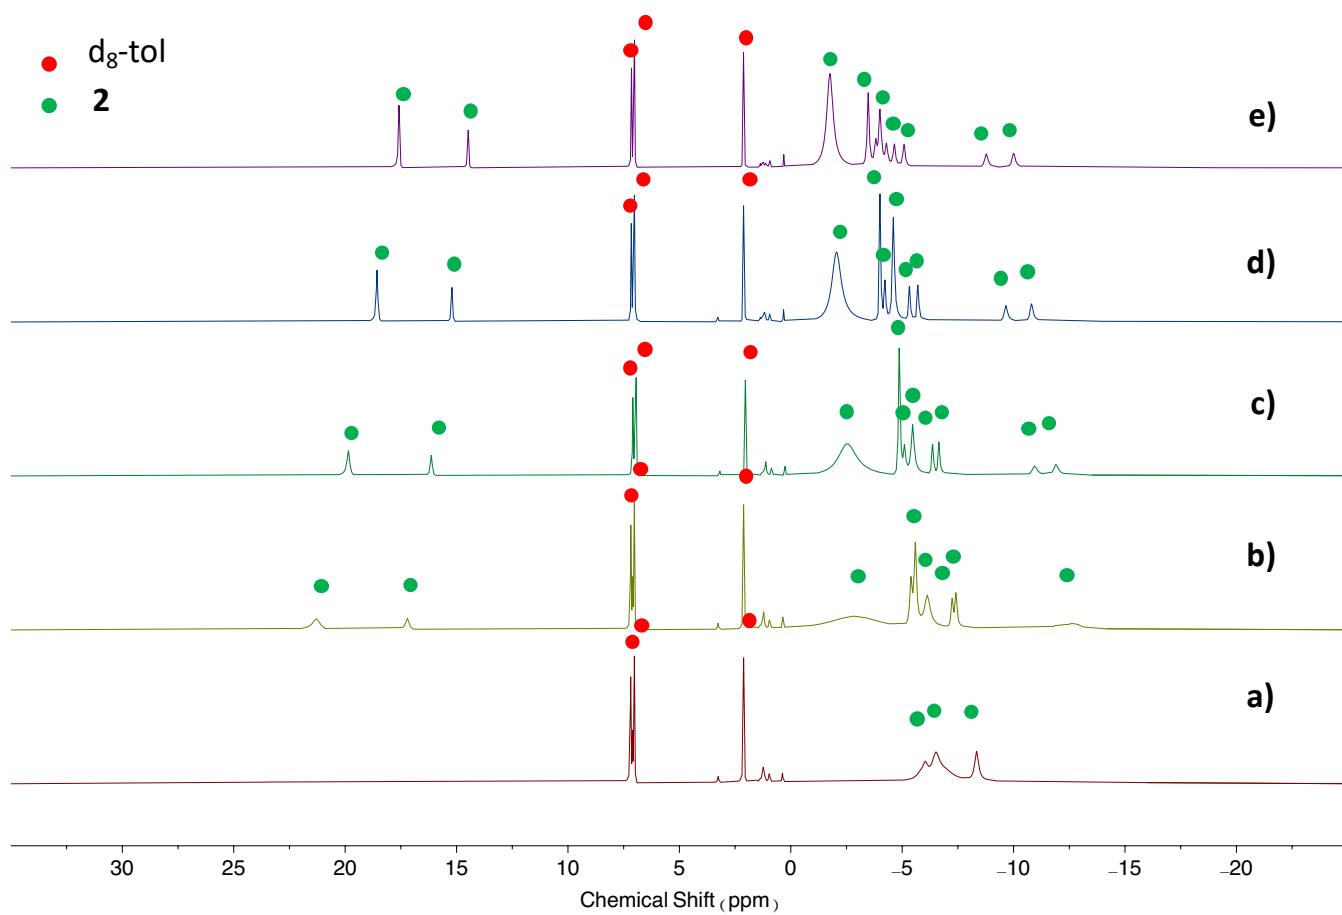

Figure S15: Variable temperature  $^1\text{H}$  NMR spectra (162 MHz,  $d_8$ -toluene) of crystals of **2**. A) 203 K, b) 218 K, c) 233 K, d) 248 K, and e) 263 K.

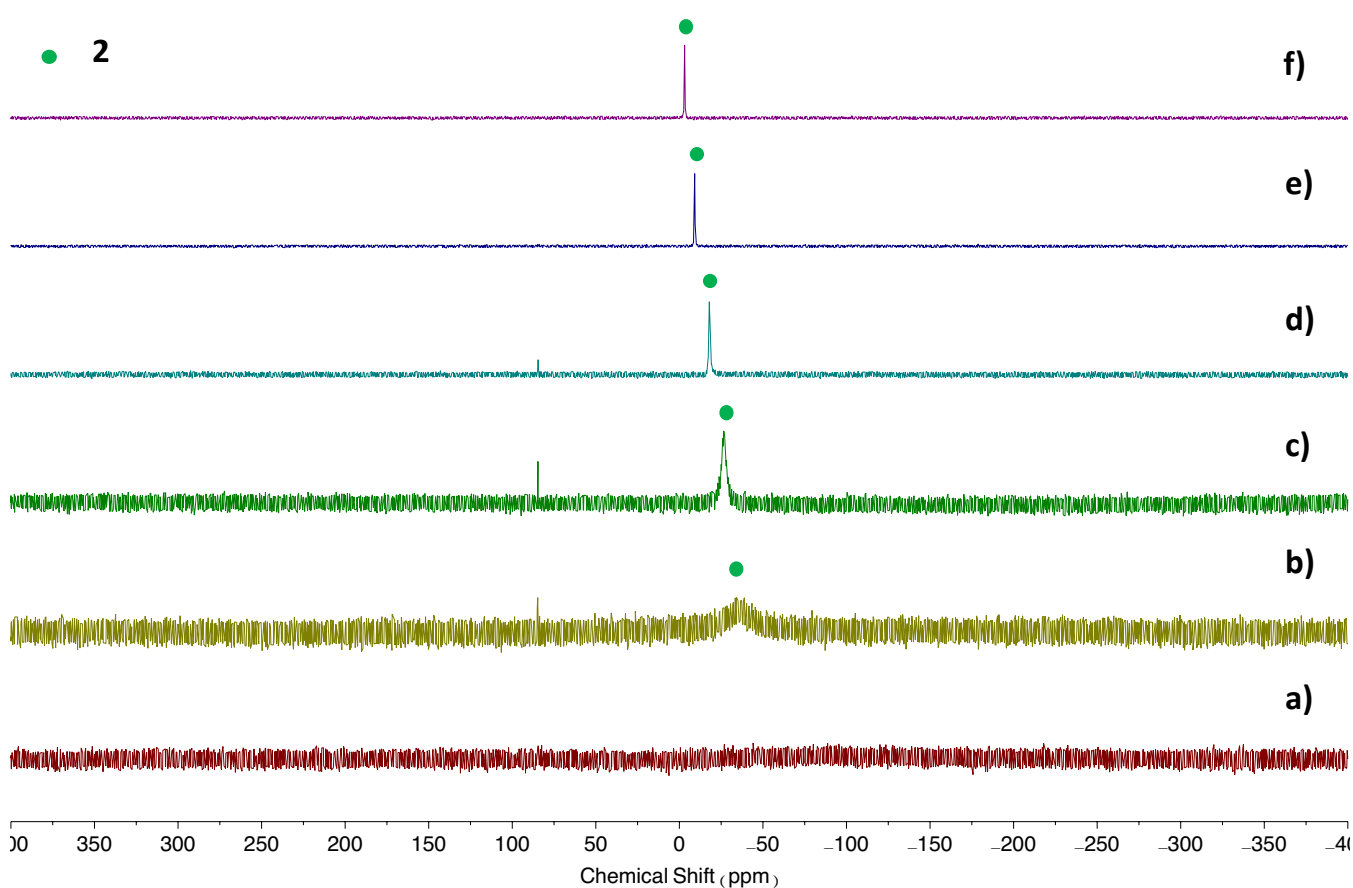

**Figure S16:** Variable temperature  $^{31}\text{P}\{^1\text{H}\}$  NMR spectra (162 MHz,  $d_8$ -toluene) of crystals of **2**. A) 193 K, b) 203 K, c) 218 K, d) 233 K, e) 248 K, and f) 263 K.

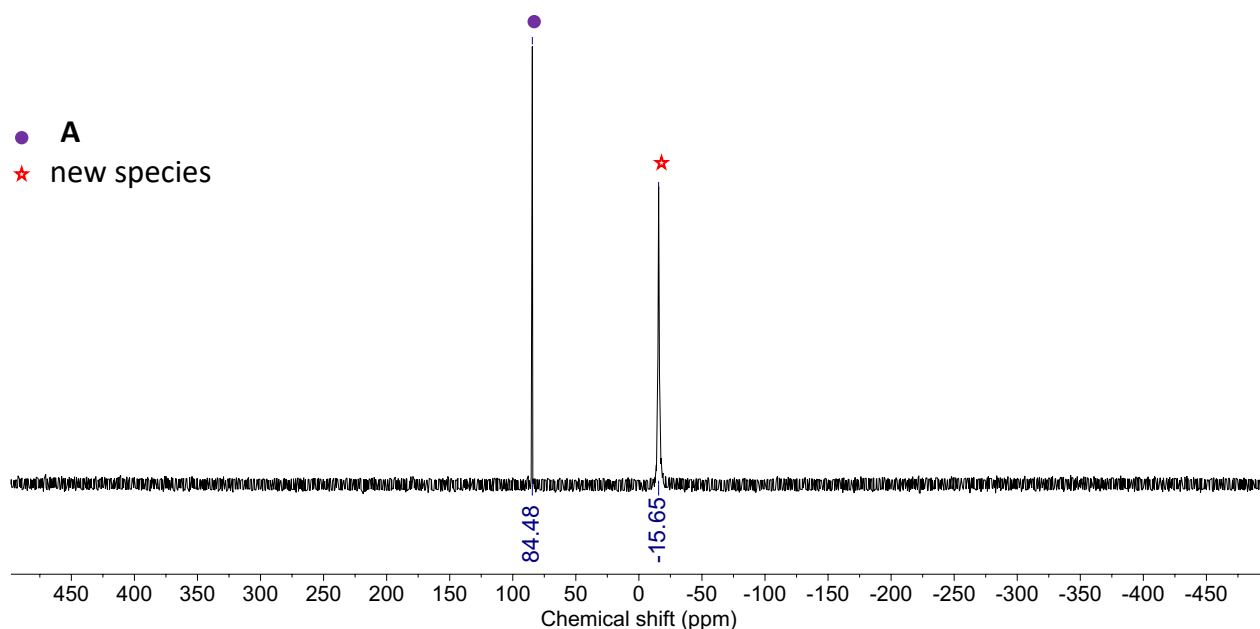

**Figure S17:**  $^{31}\text{P}\{^1\text{H}\}$  NMR spectrum (162 MHz,  $d_8$ -toluene, 233 K) of the reaction mixture obtained after addition of **A** to  $[\text{U}(\text{OTtbp})_3]$ , OTtbp = O-2,4,6- $t$ -Bu $_3$ C $_6$ H $_2$  in toluene at  $-40^\circ\text{C}$  under Ar

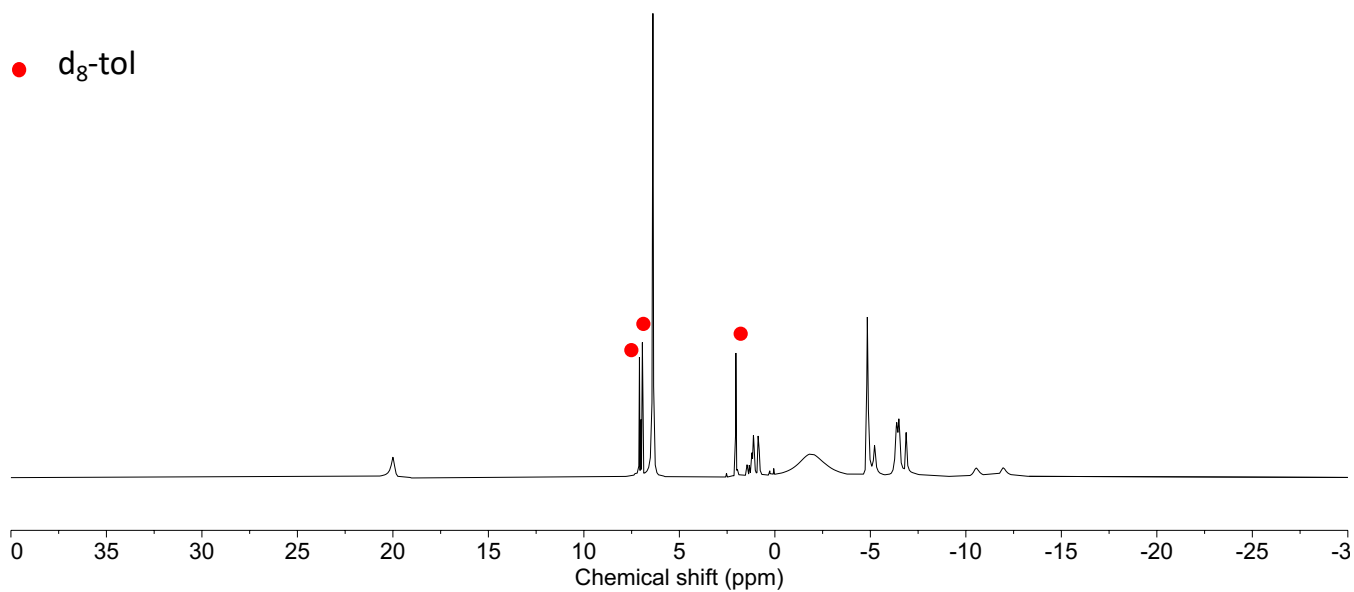

**Figure S18:** <sup>1</sup>H NMR spectrum (400 MHz, d<sub>8</sub>-toluene, 233 K) of the reaction mixture obtained after addition of **A** to [U(OTtbp)<sub>3</sub>], OTtbp = O-2,4,6-<sup>t</sup>Bu<sub>3</sub>C<sub>6</sub>H<sub>2</sub> in toluene at -40 °C under Ar

★ new species

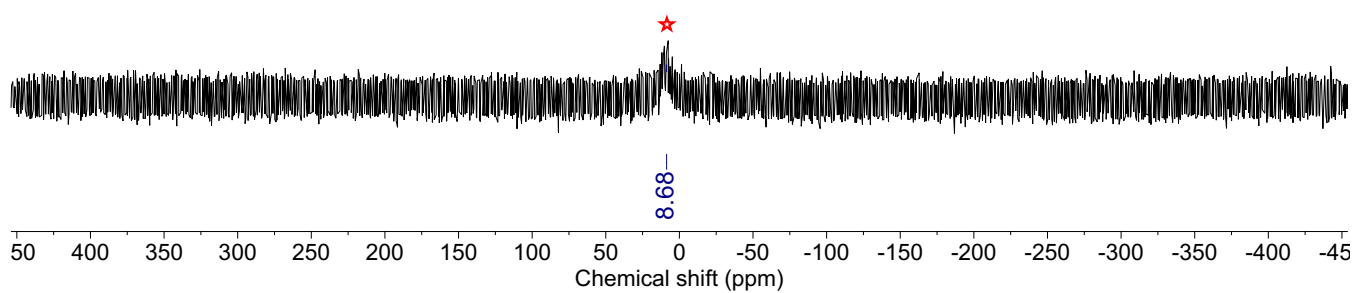

**Figure S19:** <sup>31</sup>P{<sup>1</sup>H} NMR spectrum (162 MHz, d<sub>8</sub>-toluene, 298 K) of the reaction mixture obtained after addition of **A** to [U(OTtbp)<sub>3</sub>], OTtbp = O-2,4,6-<sup>t</sup>Bu<sub>3</sub>C<sub>6</sub>H<sub>2</sub> in toluene at -40 °C under Ar

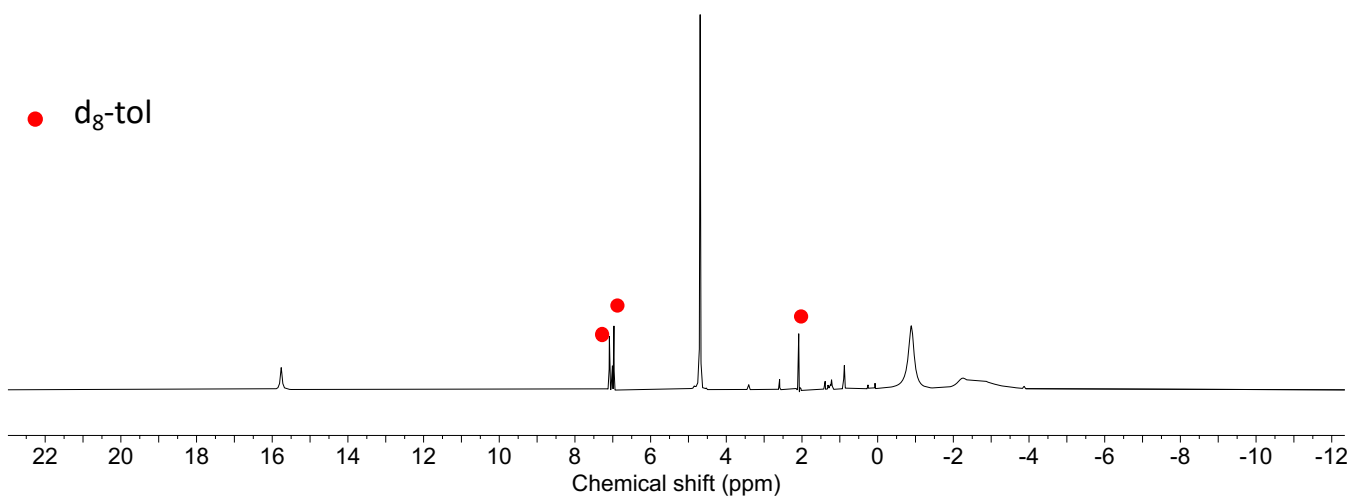

**Figure S20:**  $^1\text{H}$  NMR spectrum (400 MHz,  $d_8$ -toluene, 298 K) of the reaction mixture obtained after addition of **A** to  $[\text{U}(\text{OTtbp})_3]$ , OTtbp = O-2,4,6- $t$ Bu $_3$ C $_6$ H $_2$  in toluene at  $-40^\circ\text{C}$  under Ar

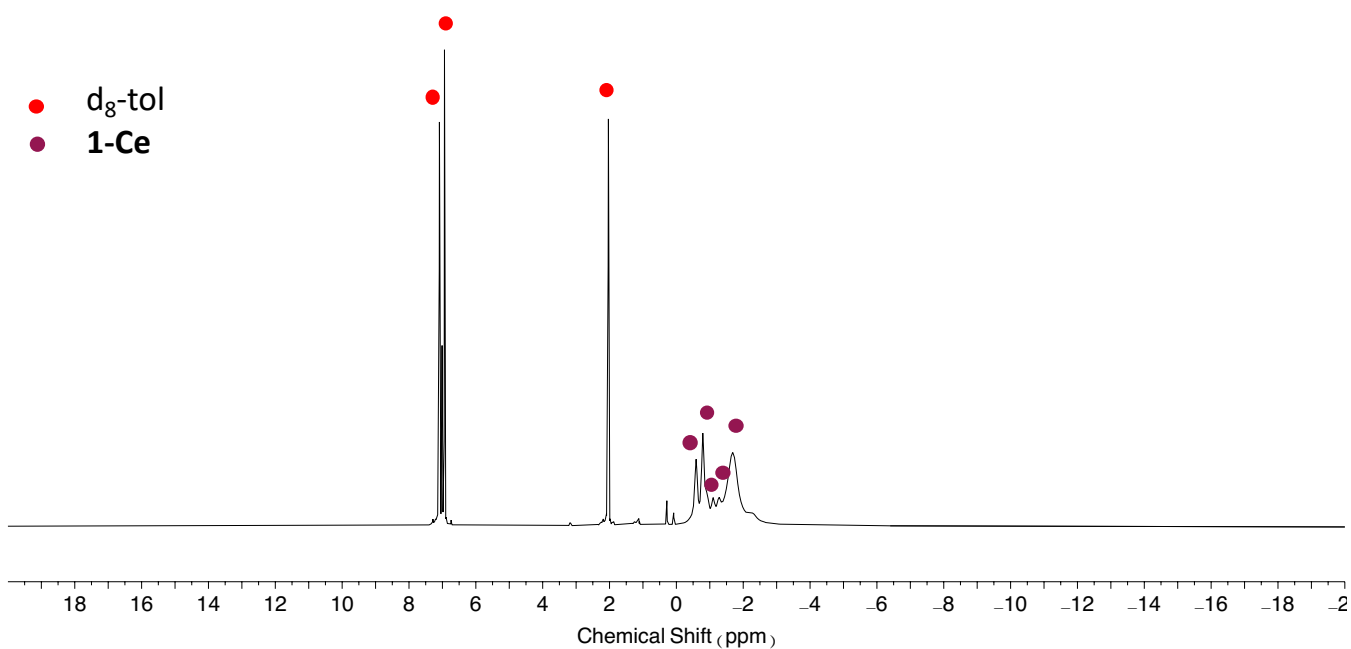

**Figure S21:**  $^1\text{H}$  NMR spectrum (400 MHz,  $d_8$ -toluene, 233 K) of crystals of **1-Ce**.



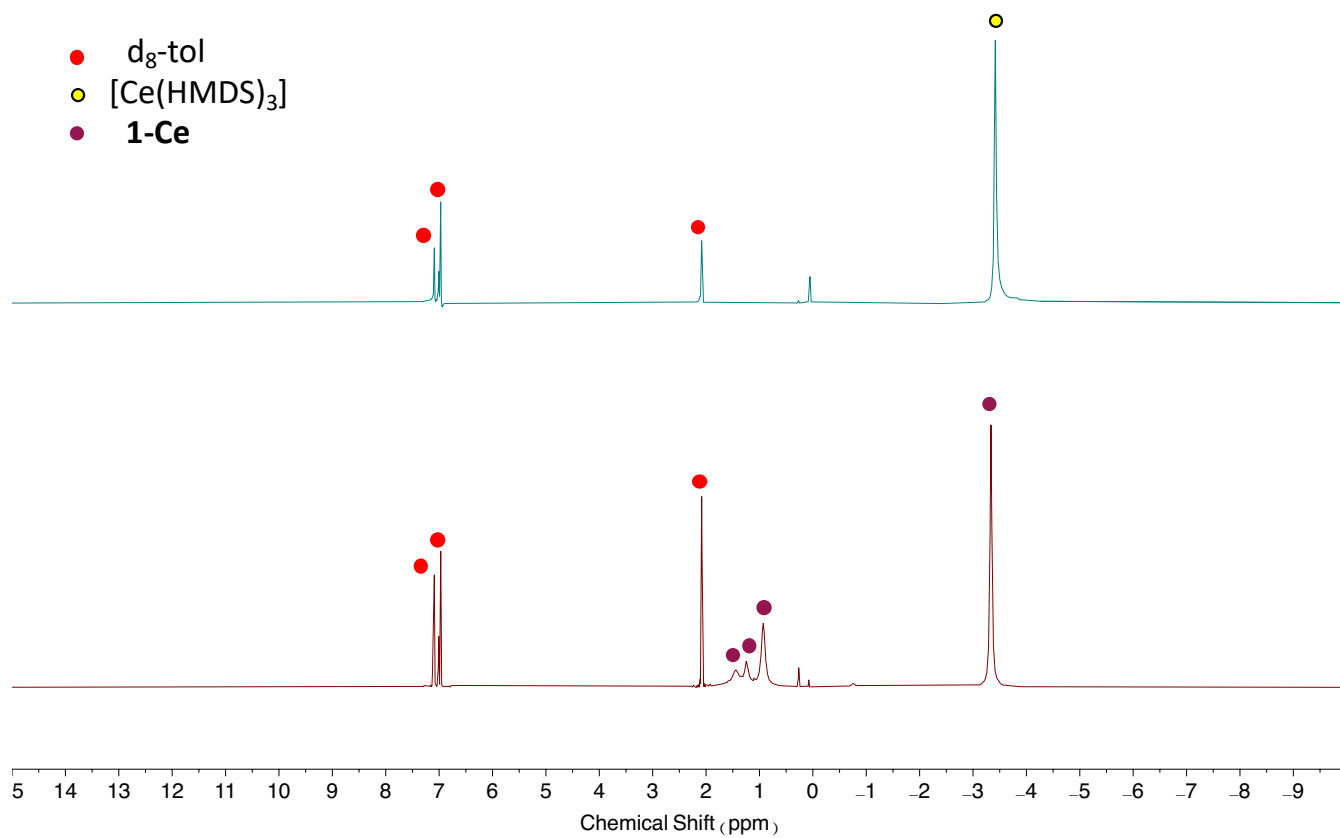

**Figure S22:** <sup>1</sup>H NMR spectra comparison (400 MHz, d<sub>8</sub>-toluene, 298 K) of crystals of **1-Ce** (bottom) and [Ce{N(SiMe<sub>3</sub>)<sub>2</sub>]<sub>3</sub>] (top).

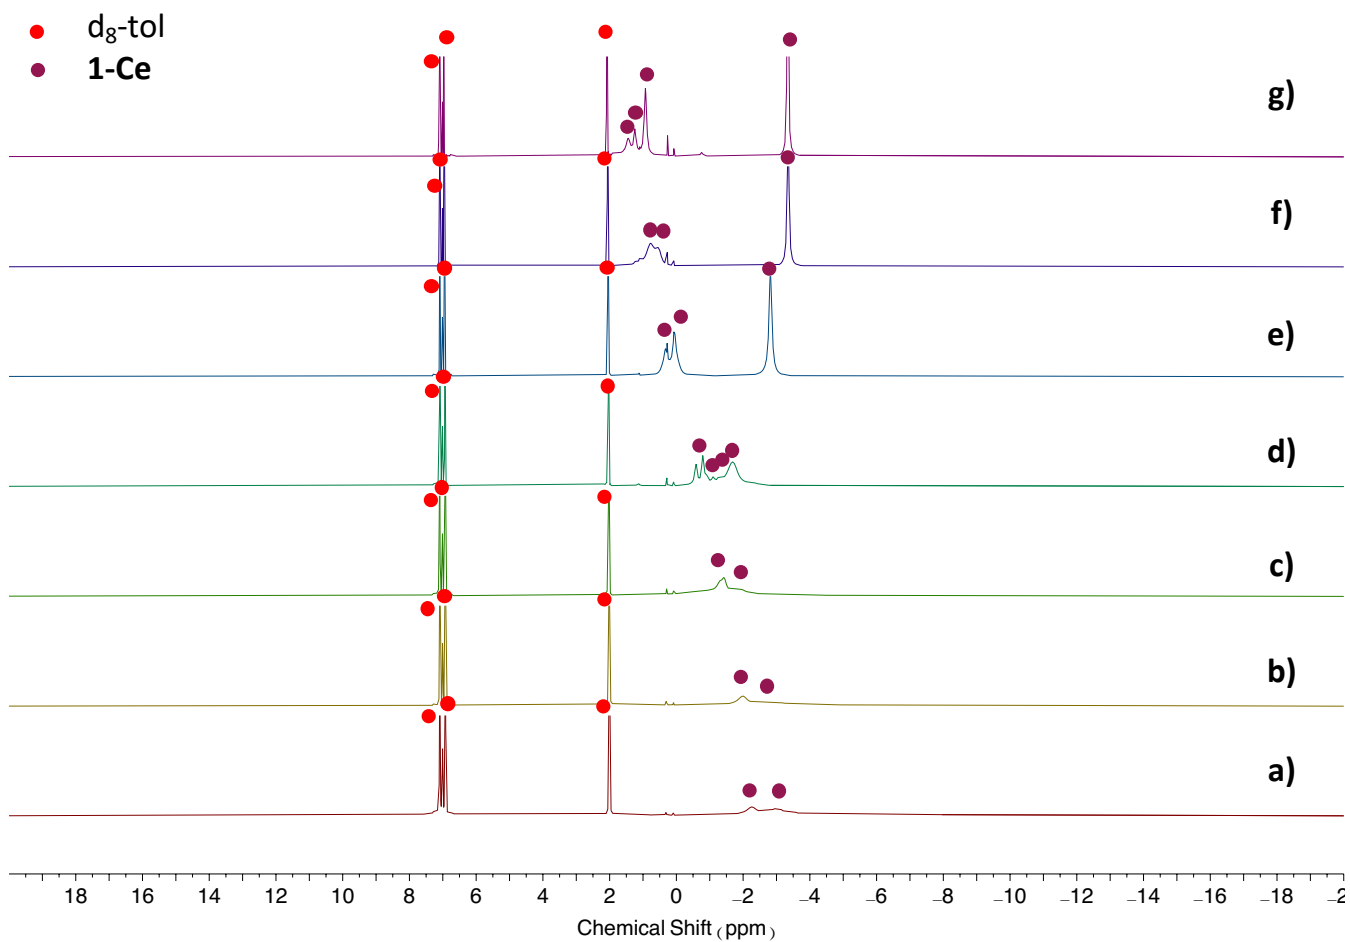

**Figure S23:** Variable temperature  $^1\text{H}$  NMR spectra (400 MHz,  $d_8$ -toluene) of crystals of **1-Ce**. A) 193 K, b) 203 K, c) 218 K, d) 233 K, e) 248 K, f) 263 K, and g) 298 K.

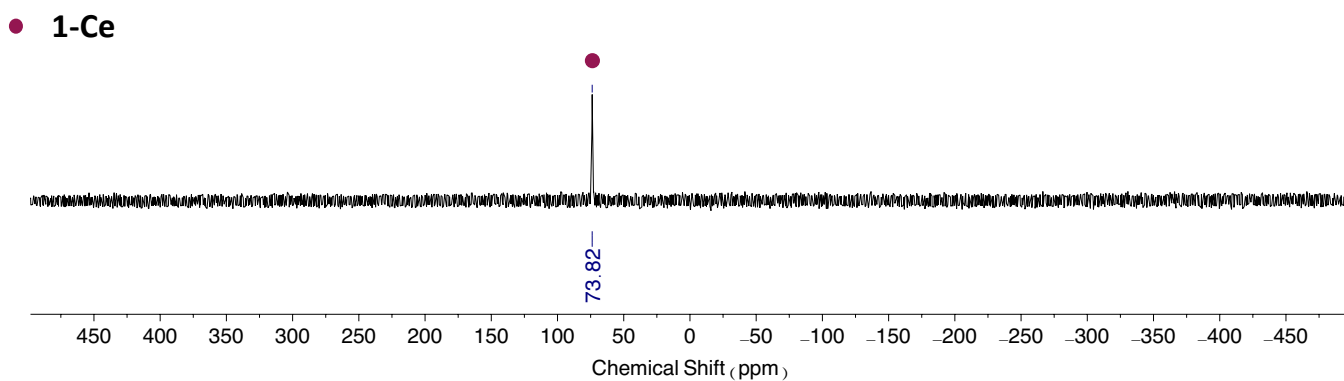

**Figure S24:**  $^{31}\text{P}\{^1\text{H}\}$  NMR spectrum (162 MHz,  $d_8$ -toluene, 233 K) of crystals of **1-Ce**.

● 1-Ce

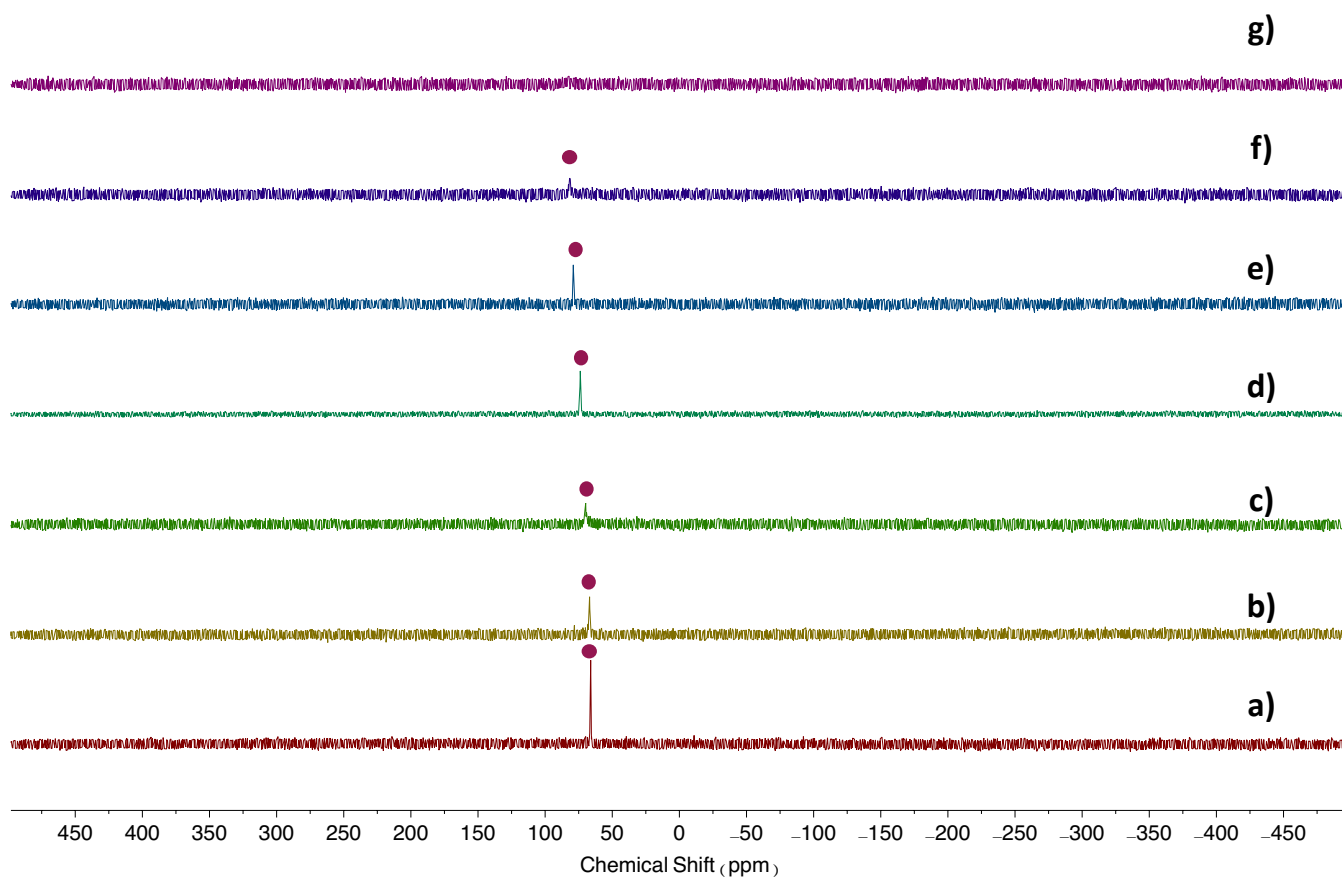

Figure S25: Variable temperature  $^{31}\text{P}\{^1\text{H}\}$  NMR spectra (162 MHz,  $d_8$ -toluene) of crystals of **1-Ce**. A) 193 K, b) 203 K, c) 218 K, d) 233 K, e) 248 K, f) 263 K, and g) 298 K.

● A

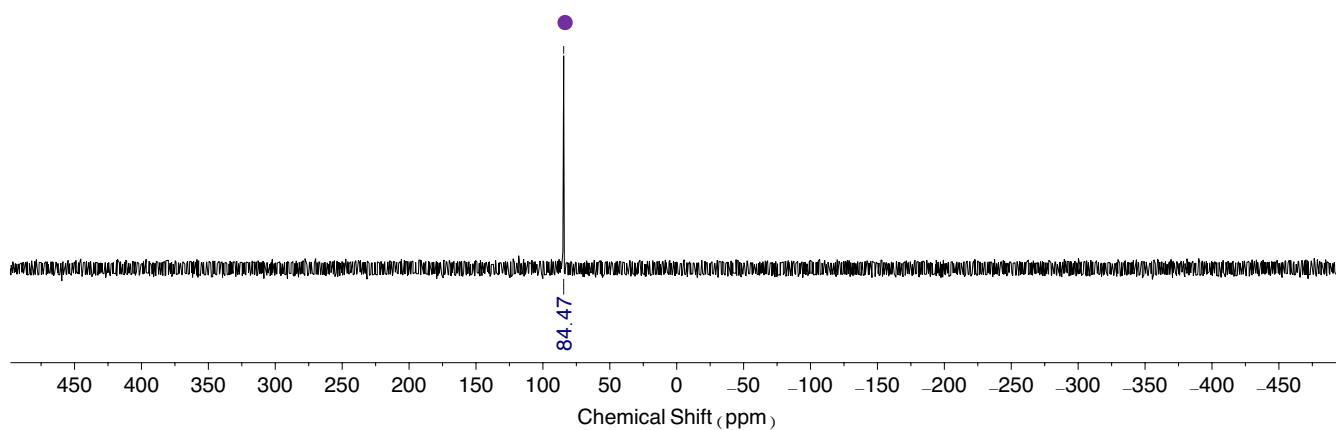

Figure S26:  $^{31}\text{P}\{^1\text{H}\}$  NMR spectrum (162 MHz,  $d_8$ -THF, 233 K) of crystals of **1-Ce**.

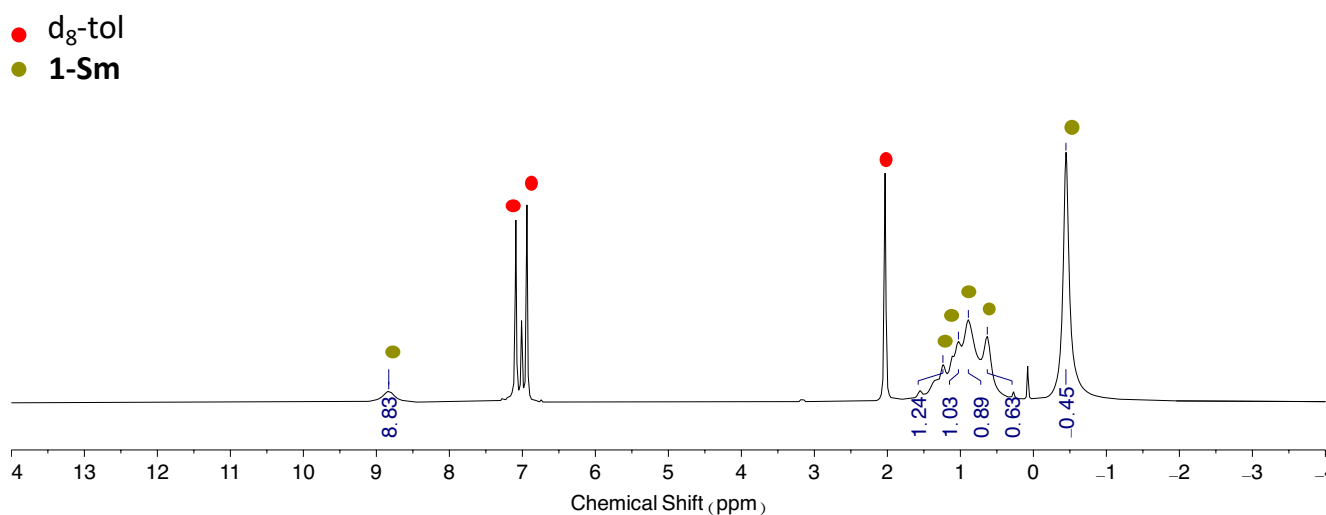

Figure S27:  $^1\text{H}$  NMR spectrum (400 MHz,  $d_8$ -toluene, 233 K) of crystals of **1-Sm**.

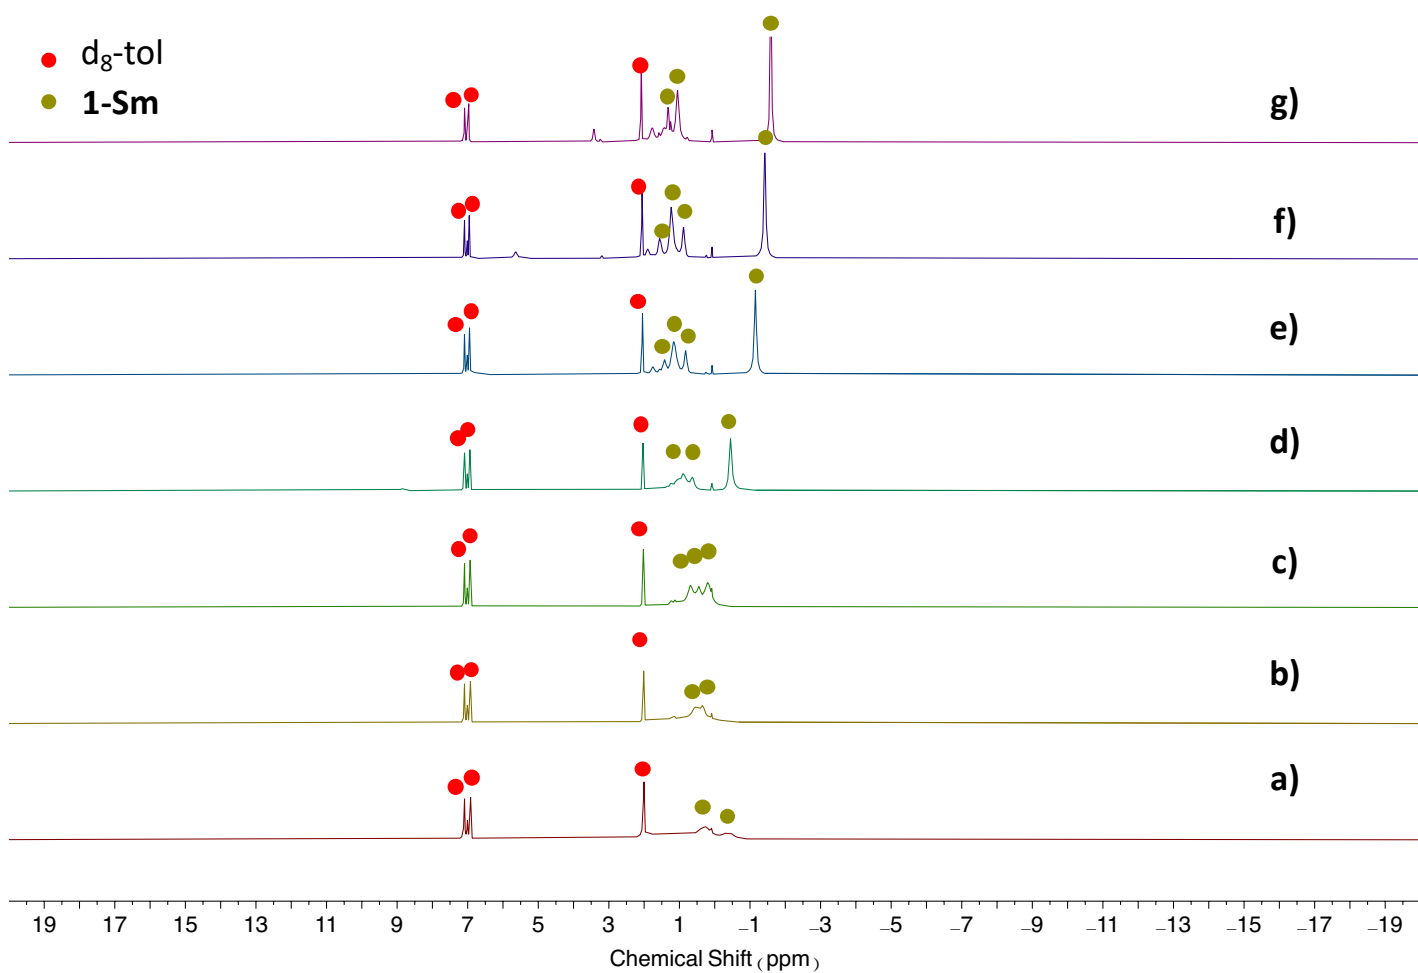

Figure S28: Variable temperature  $^1\text{H}$  NMR spectra (400 MHz,  $d_8$ -toluene) of crystals of **1-Sm**. A) 193 K, b) 203 K, c) 218 K, d) 233 K, e) 248 K, f) 263 K, and g) 298 K.

● 1-Sm

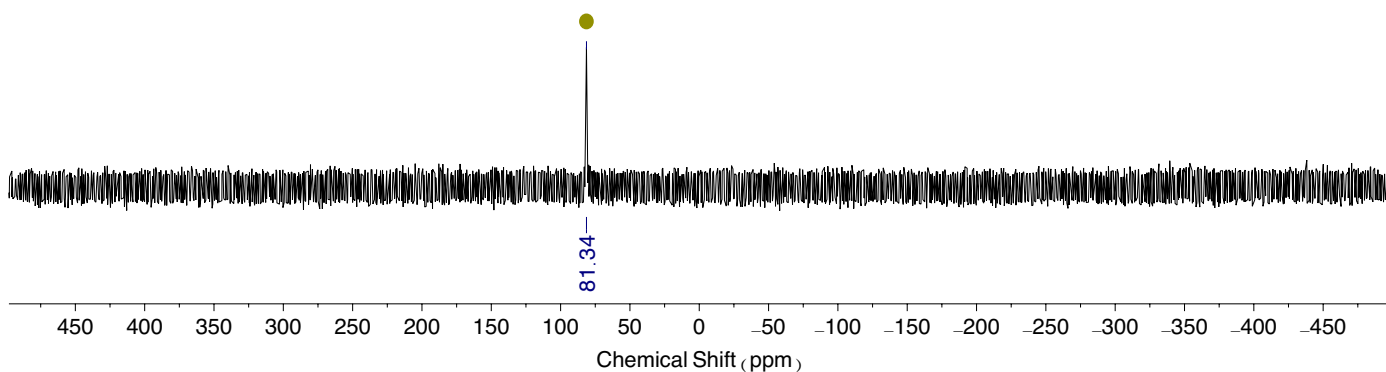

Figure S29:  $^{31}\text{P}\{^1\text{H}\}$  NMR spectrum (162 MHz,  $d_8$ -toluene, 233 K) of crystals of **1-Sm**.

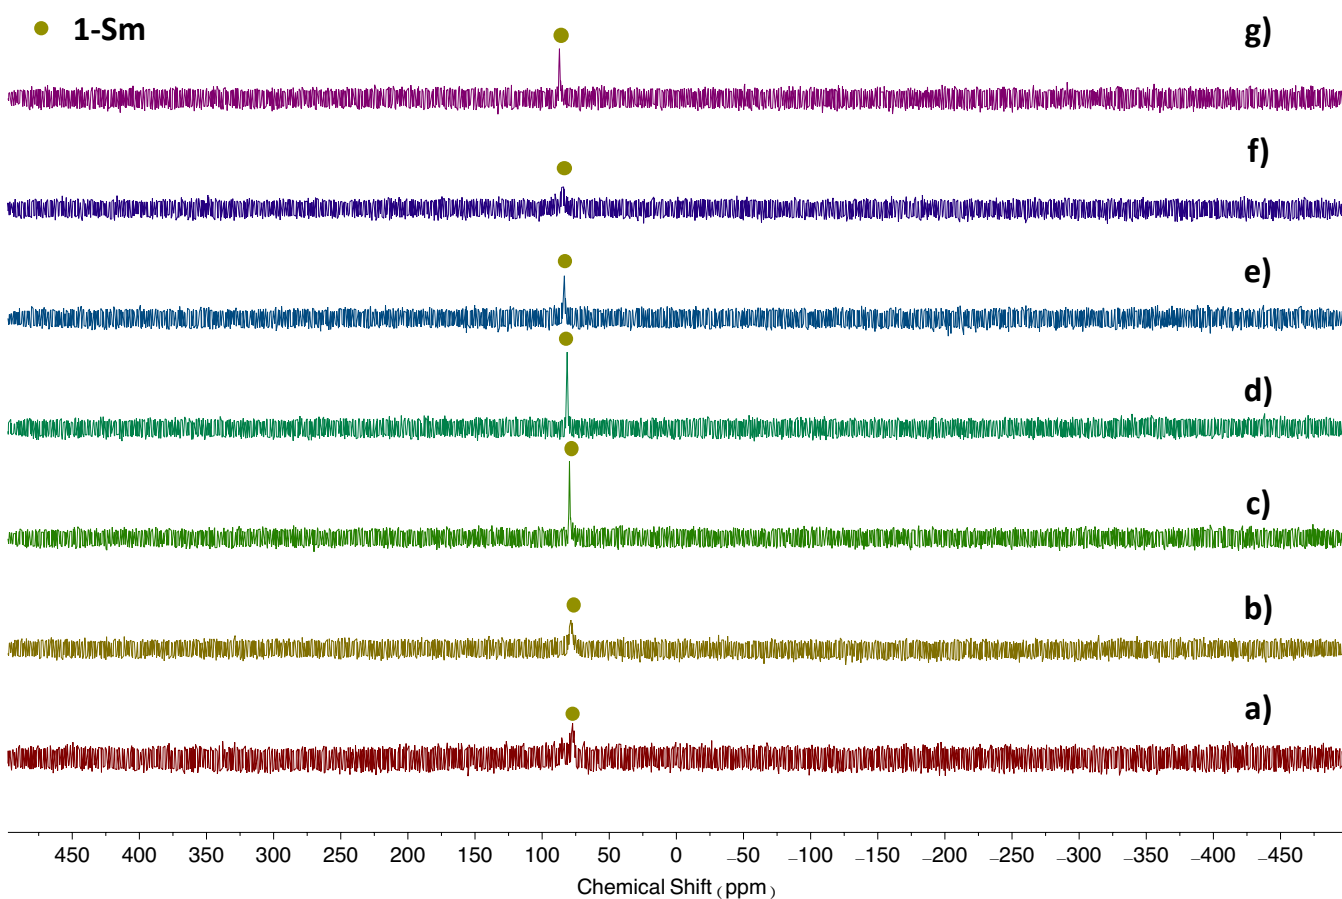

Figure S30: Variable temperature  $^{31}\text{P}\{^1\text{H}\}$  NMR spectra (162 MHz,  $d_8$ -toluene) of crystals of **1-Sm** a) 193 K, b) 203 K, c) 218 K, d) 233 K, e) 248 K, f) 263 K, and g) 298 K.

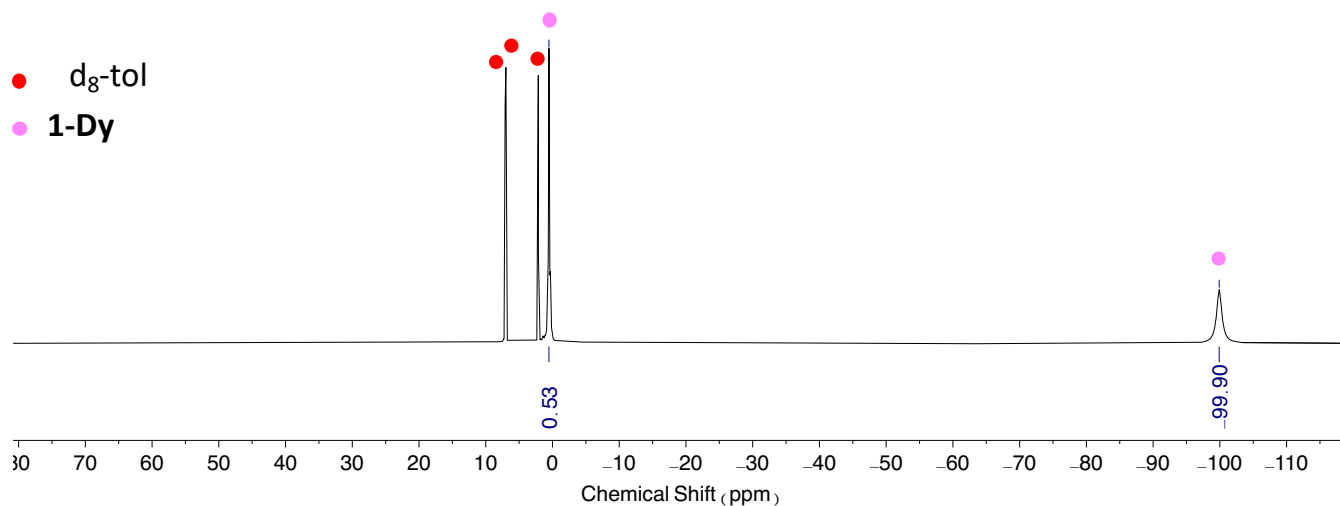

Figure S31:  $^1\text{H}$  NMR spectrum (400 MHz,  $d_8$ -toluene, 298 K) of crystals of 1-Dy.

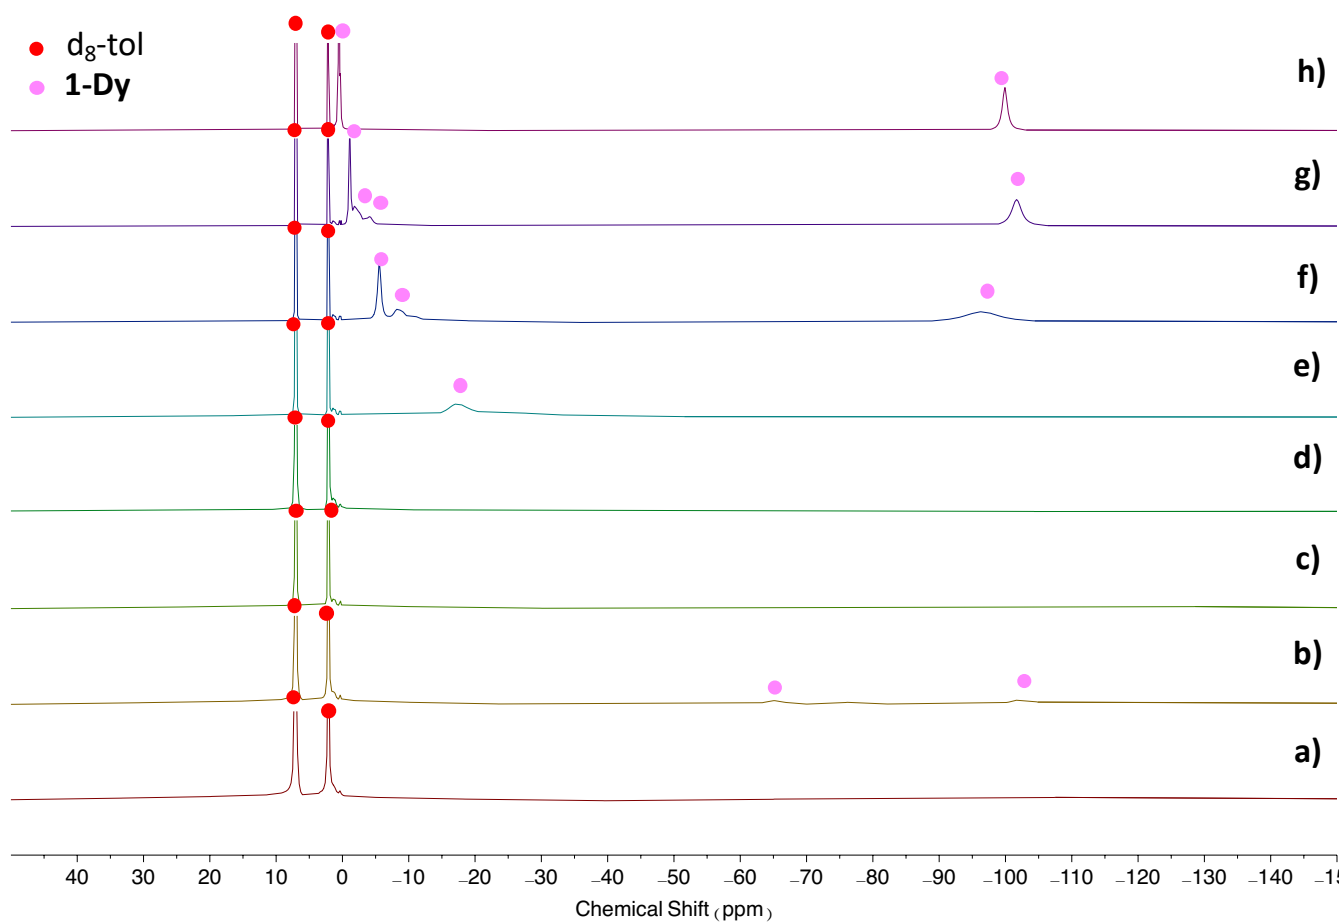

Figure S32: Variable temperature  $^1\text{H}$  NMR spectra (400 MHz,  $d_8$ -toluene) of crystals of 1-Dy. a) 193 K, b) 203 K, c) 218 K, d) 233 K, e) 248 K, f) 263 K, g) 278 K and h) 298 K.

● 1-Dy

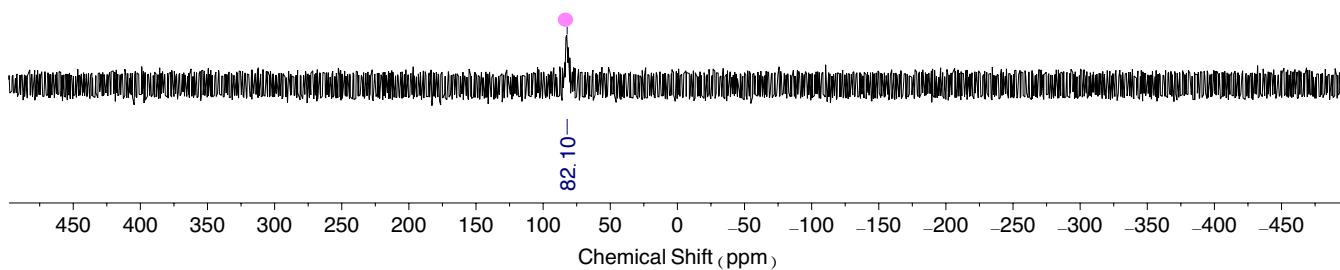

Figure S33:  $^{31}\text{P}\{^1\text{H}\}$  NMR spectrum (162 MHz,  $d_8$ -toluene, 298 K) of crystals of **1-Dy**.

● 1-Dy

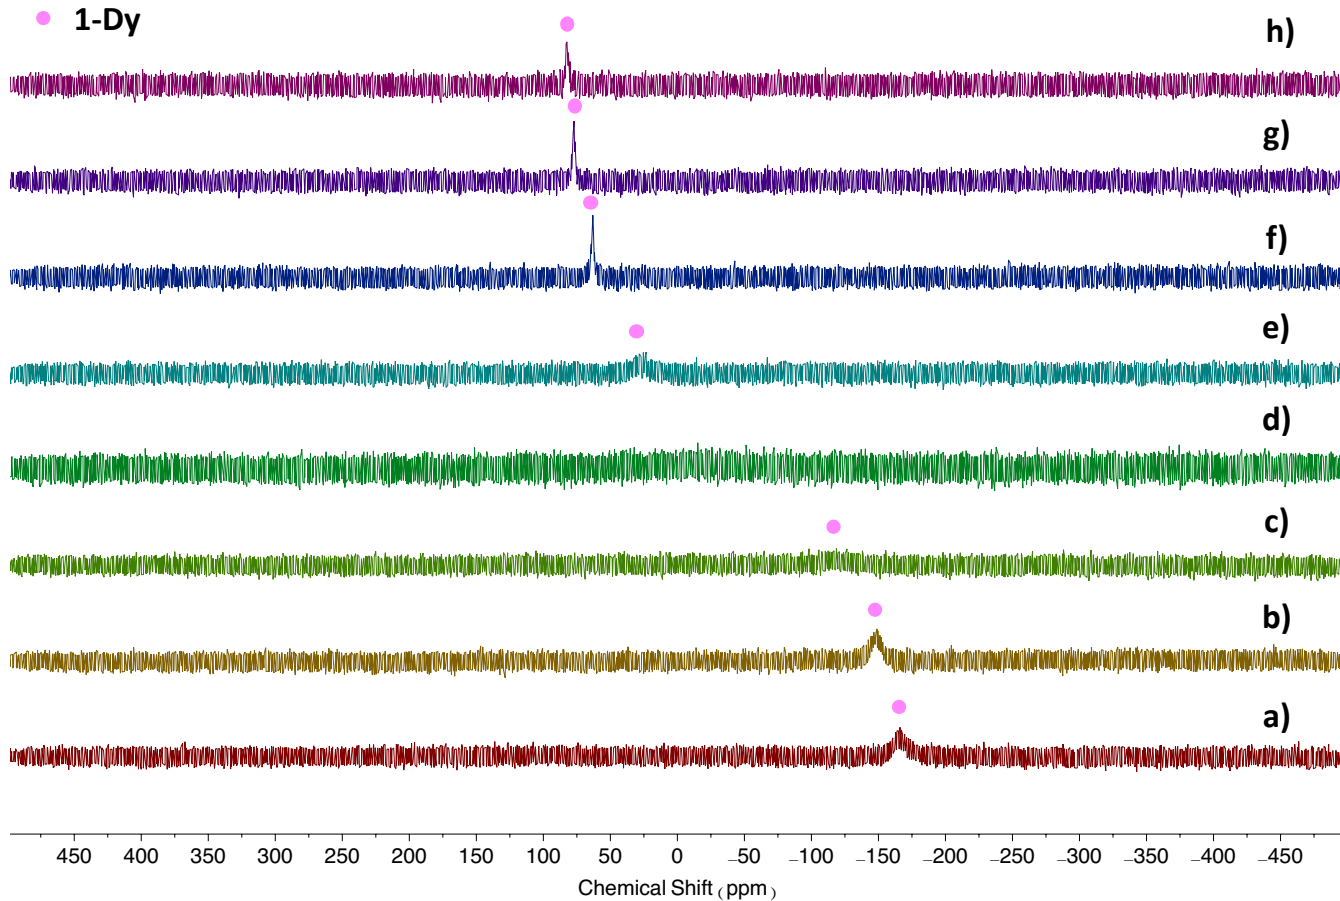

Figure S34: Variable temperature  $^{31}\text{P}\{^1\text{H}\}$  NMR spectra (162 MHz,  $d_8$ -toluene) of crystals of **1-Dy** a) 193 K, b) 203 K, c) 218 K, d) 233 K, e) 248 K, f) 263 K, g) 278 K and h) 298 K.

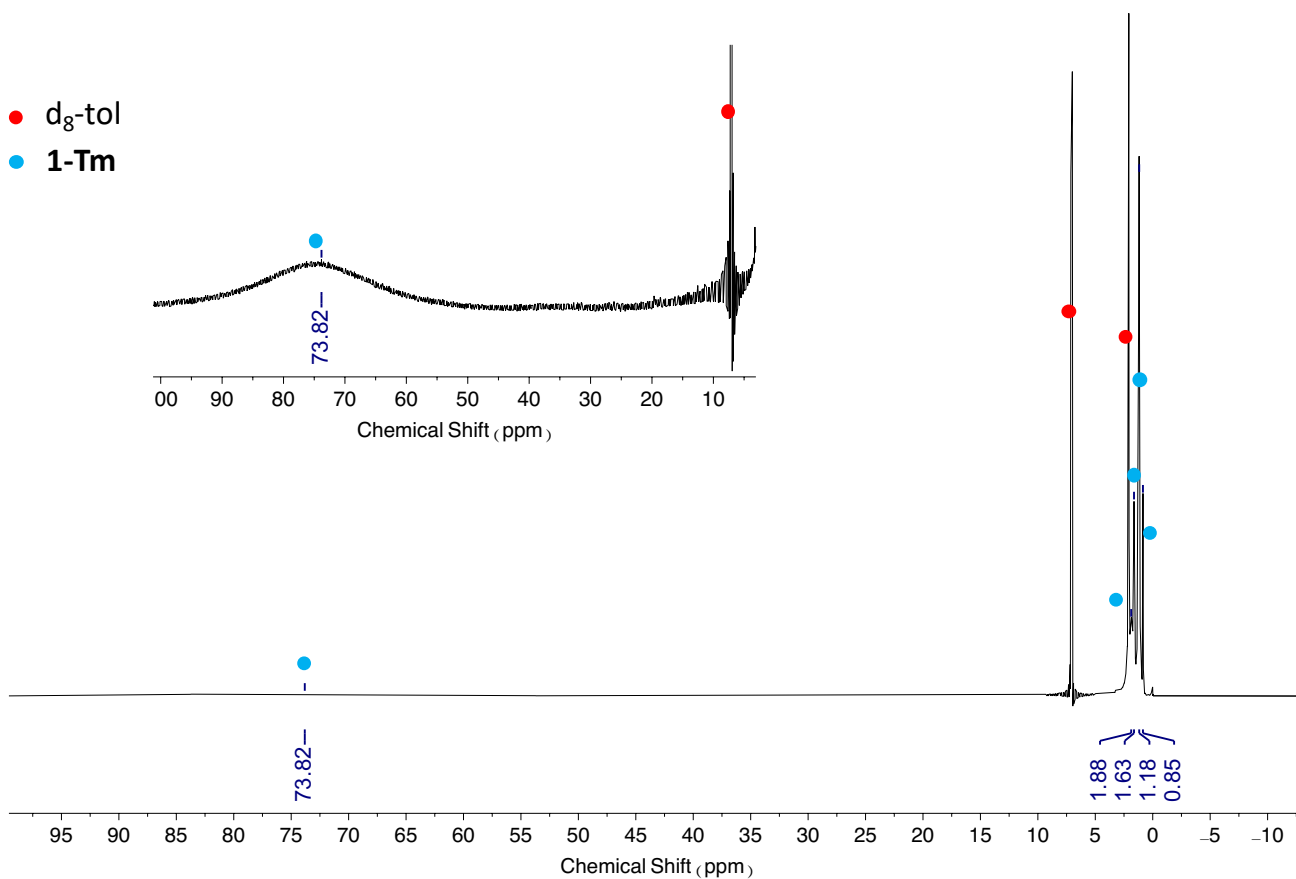

**Figure S35:**  $^1\text{H}$  NMR spectrum (400 MHz,  $d_8$ -toluene, 298 K) of crystals of **1-Tm**.

● **1-Tm**

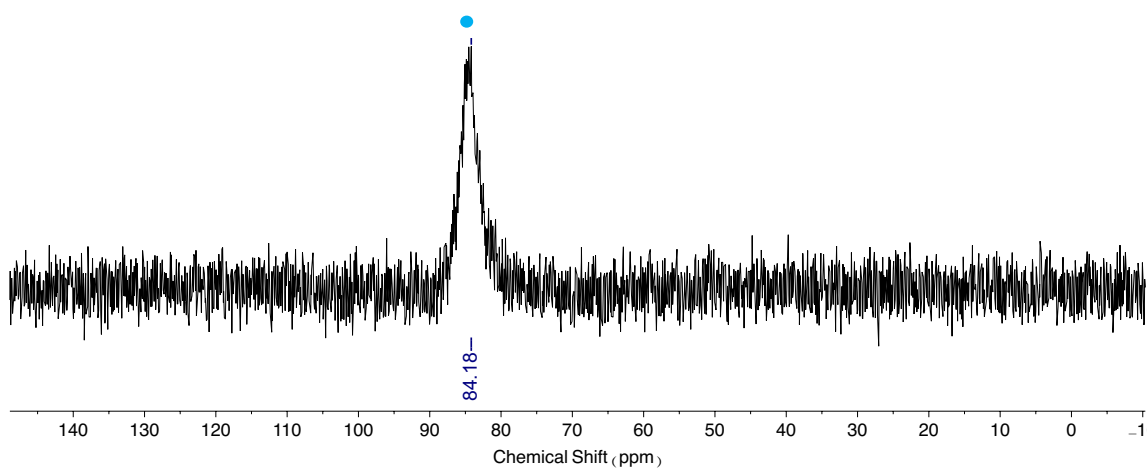

**Figure S36:**  $^{31}\text{P}\{^1\text{H}\}$  NMR spectrum (162 MHz,  $d_8$ -toluene, 298 K) of crystals of **1-Tm**



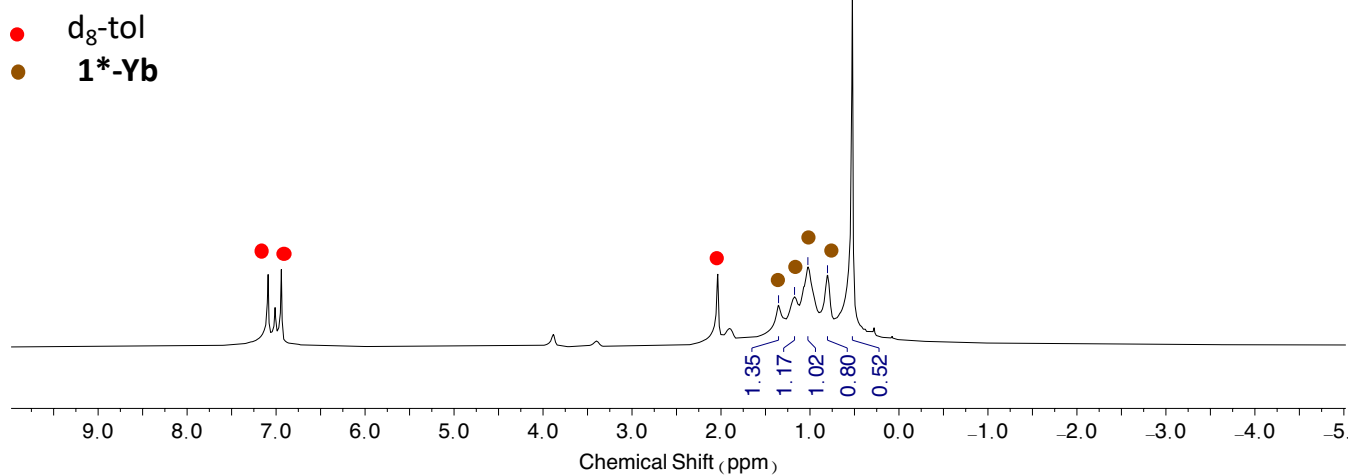

Figure S37:  $^1\text{H}$  NMR spectrum (400 MHz,  $d_8$ -toluene, 233 K) of crystals of **1\*-Yb**.

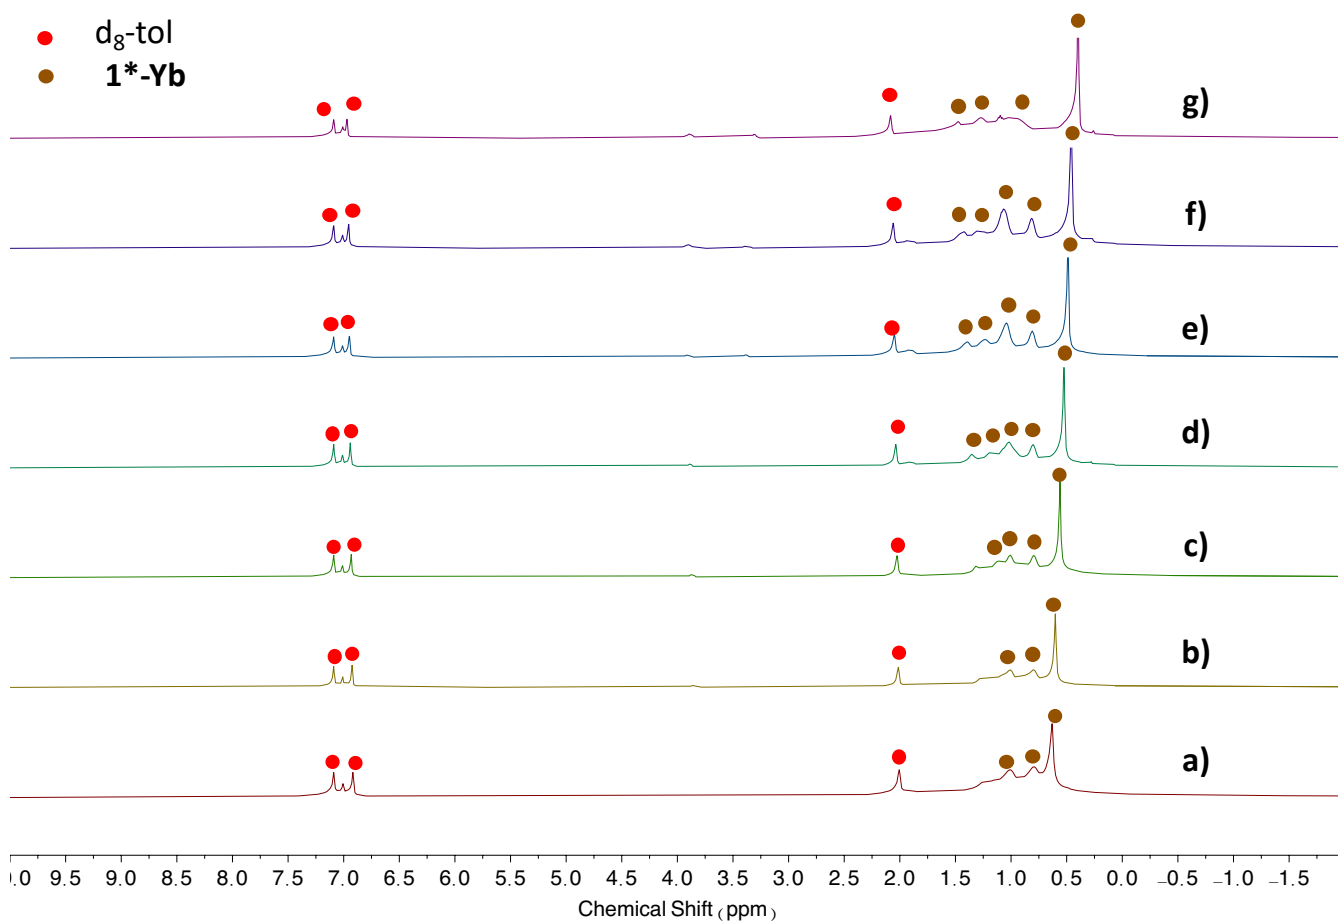

Figure S38: Variable temperature  $^1\text{H}$  NMR spectra (400 MHz,  $d_8$ -toluene) of crystals of **1\*-Yb**. a) 193 K, b) 203 K, c) 218 K, d) 233 K, e) 248 K, f) 263 K, and g) 298 K.

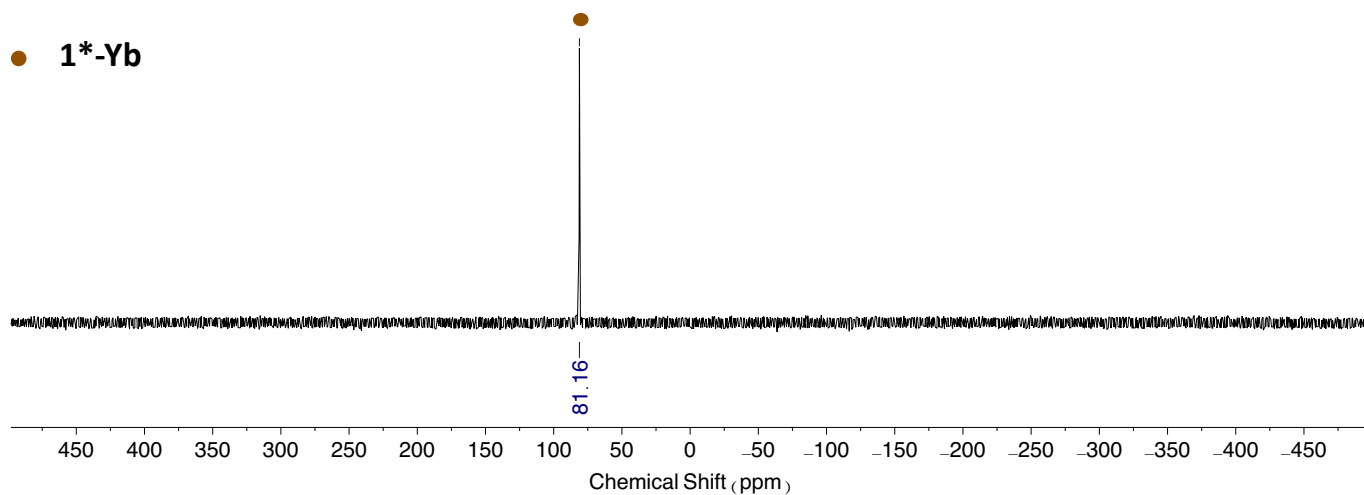

**Figure S39:**  $^{31}\text{P}\{^1\text{H}\}$  NMR spectrum (162 MHz,  $d_8$ -toluene, 233 K) of crystals of **1\*-Yb**.

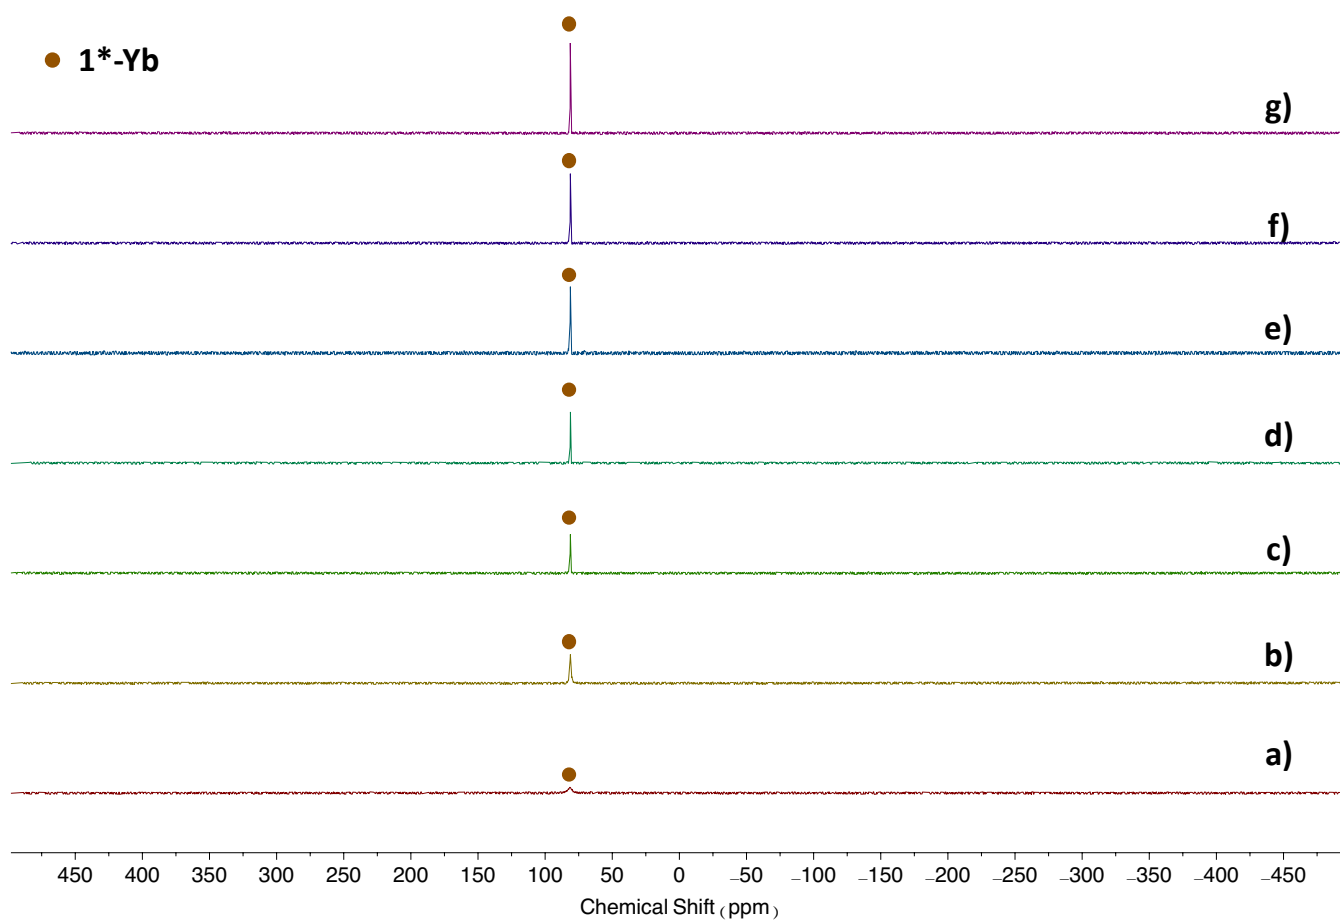

**Figure S40:** Variable temperature  $^{31}\text{P}\{^1\text{H}\}$  NMR spectra (162 MHz,  $d_8$ -toluene) of crystals of **1\*-Yb** a) 193 K, b) 203 K, c) 218 K, d) 233 K, e) 248 K, f) 263 K, and g) 298 K.

● A

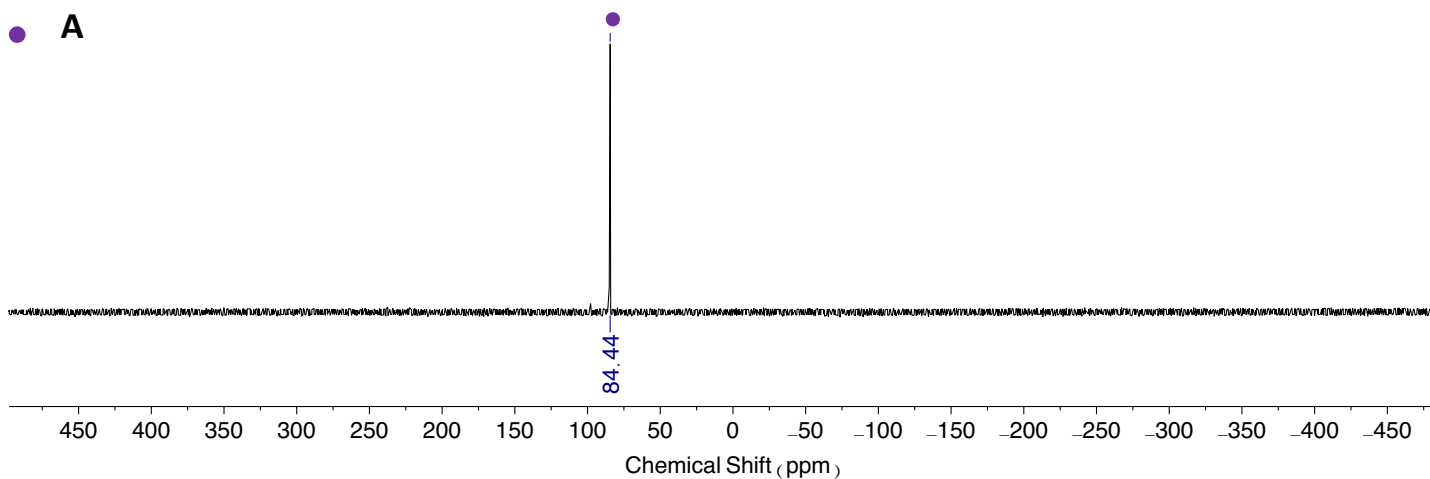

Figure S41:  $^{31}\text{P}\{^1\text{H}\}$  NMR spectrum (162 MHz,  $\text{d}_8\text{-THF}$ , 233 K) of crystals of  $\mathbf{1^*}\text{-Yb}$ .

●  $\text{C}_6\text{D}_{12}$   
★  $\mathbf{1^*}\text{-Sm}$

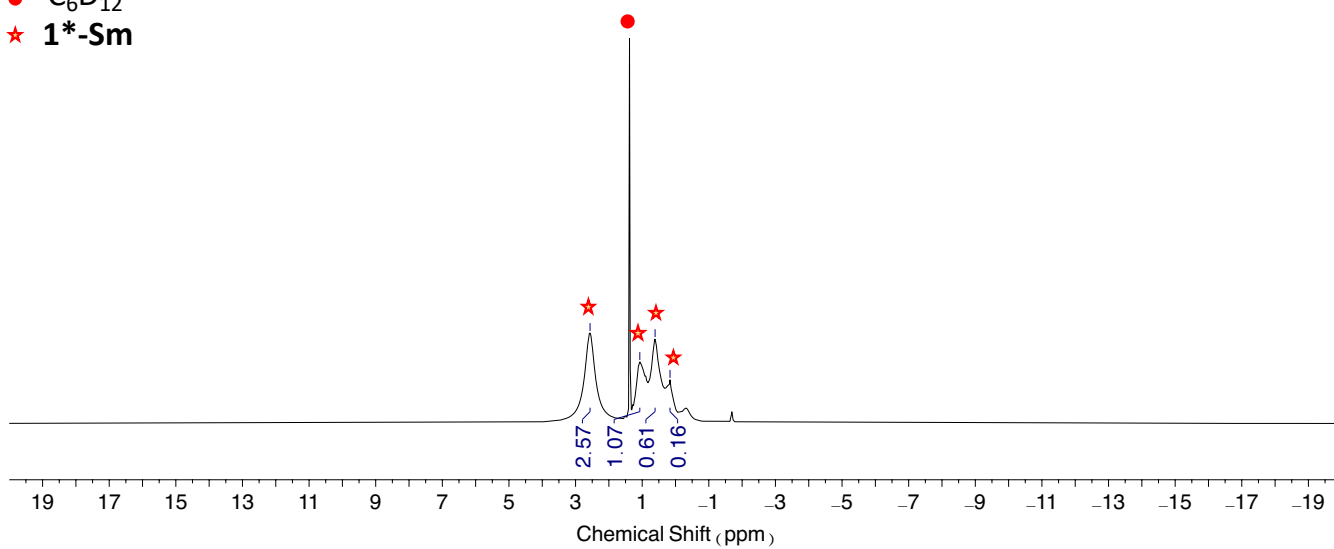

Figure S42:  $^1\text{H}$  NMR spectrum (400 MHz,  $\text{C}_6\text{D}_{12}$ , 298 K) of crystals of  $\mathbf{1^*}\text{-Sm}$ .

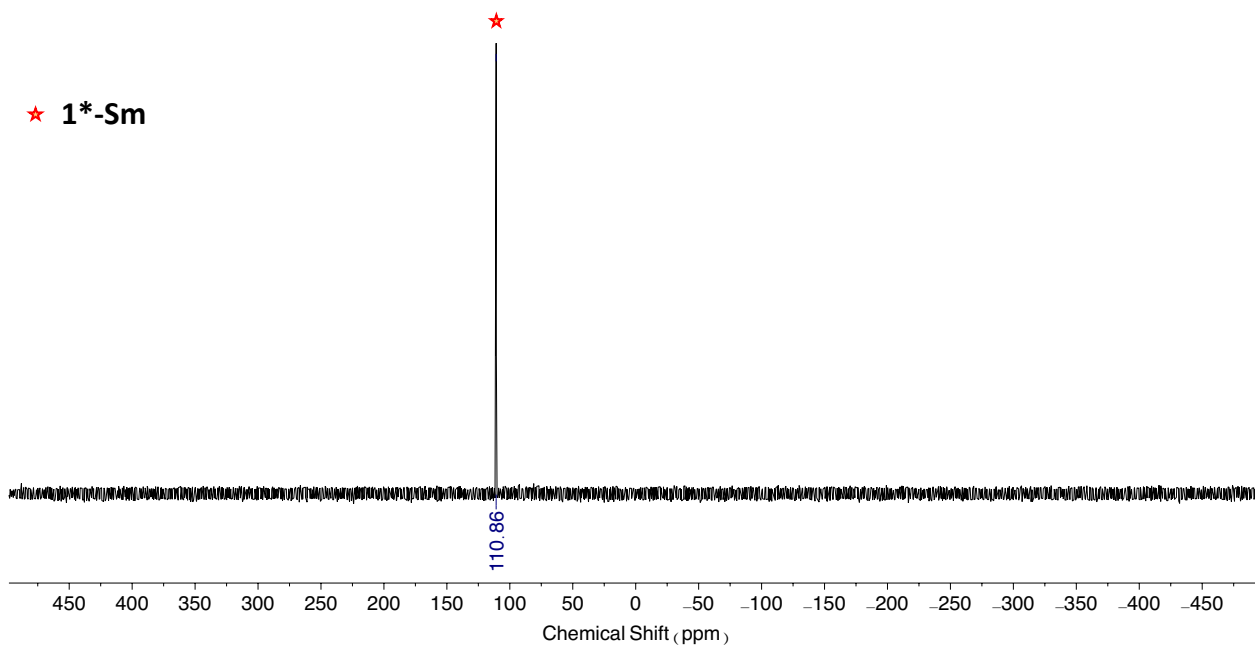

Figure S43:  $^{31}\text{P}\{^1\text{H}\}$  NMR spectrum (162 MHz,  $\text{C}_6\text{D}_{12}$ , 298 K) of crystals of 1\*-Sm.

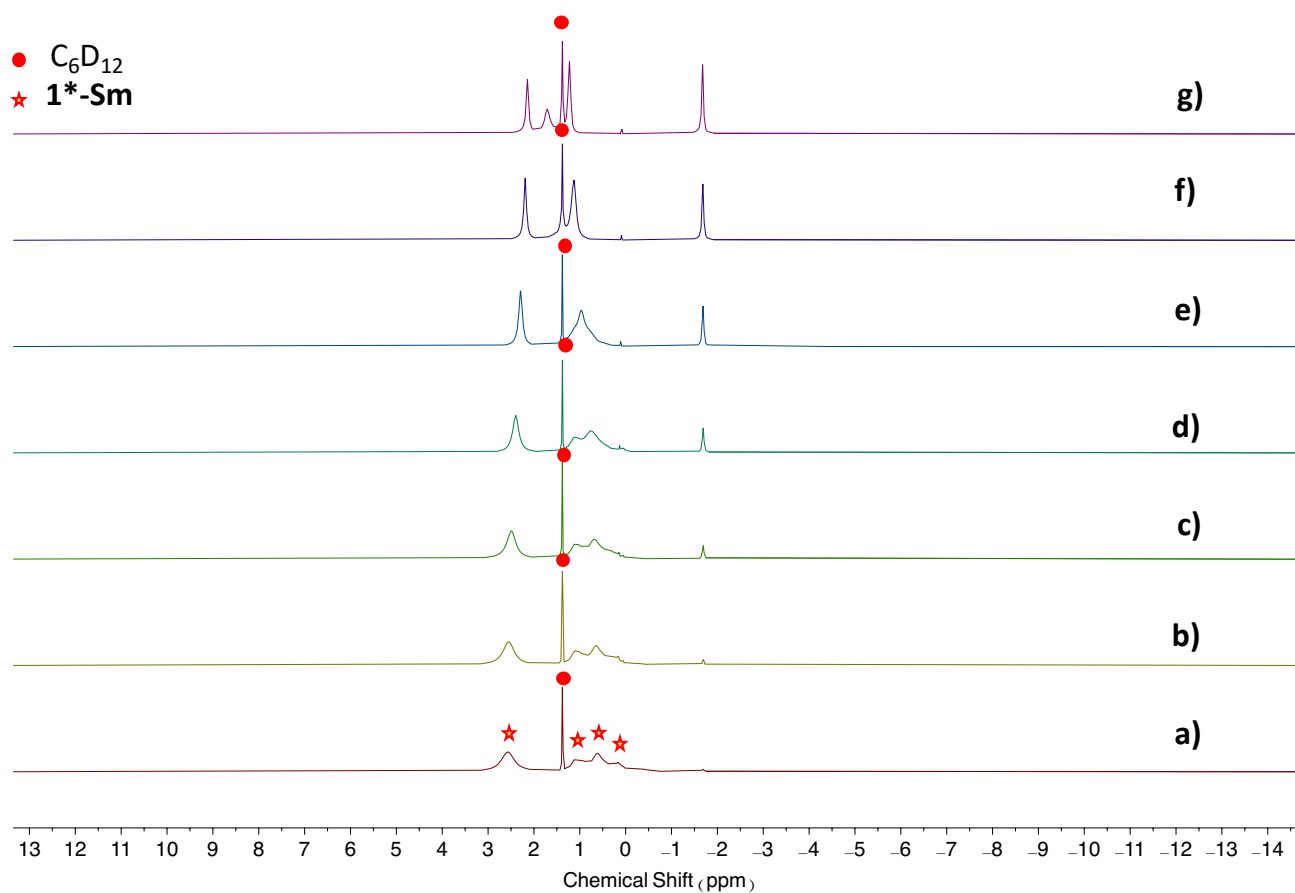

Figure S44:  $^1\text{H}$  NMR spectrum (400 MHz,  $\text{C}_6\text{D}_{12}$ , 298 K) evolution of crystals of 1\*-Sm in cyclohexane solution a) immediately, b) after 30 min, c) after 1 h, d) after 3 h, e) after 6 h, f) after 12 h, and g) after 24 h at 25 °C.

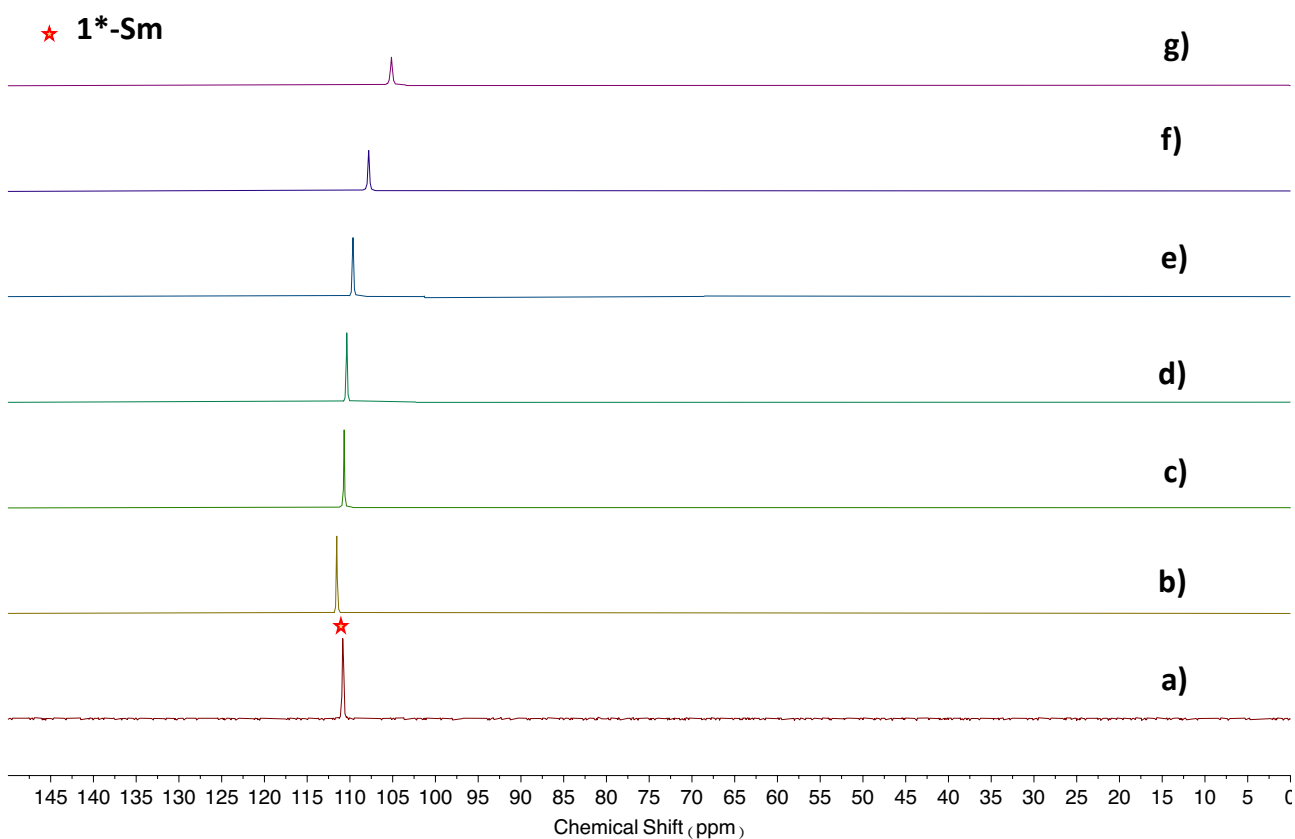

**Figure S45:**  $^{31}\text{P}\{^1\text{H}\}$  NMR spectrum (162 MHz,  $\text{C}_6\text{D}_{12}$ , 298 K) evolution of crystals of **1\*-Sm** in cyclohexane solution a) immediately, b) after 30 min, c) after 1 h, d) after 3 h, e) after 6 h, f) after 12 h, and g) after 24 h at 25 °C.

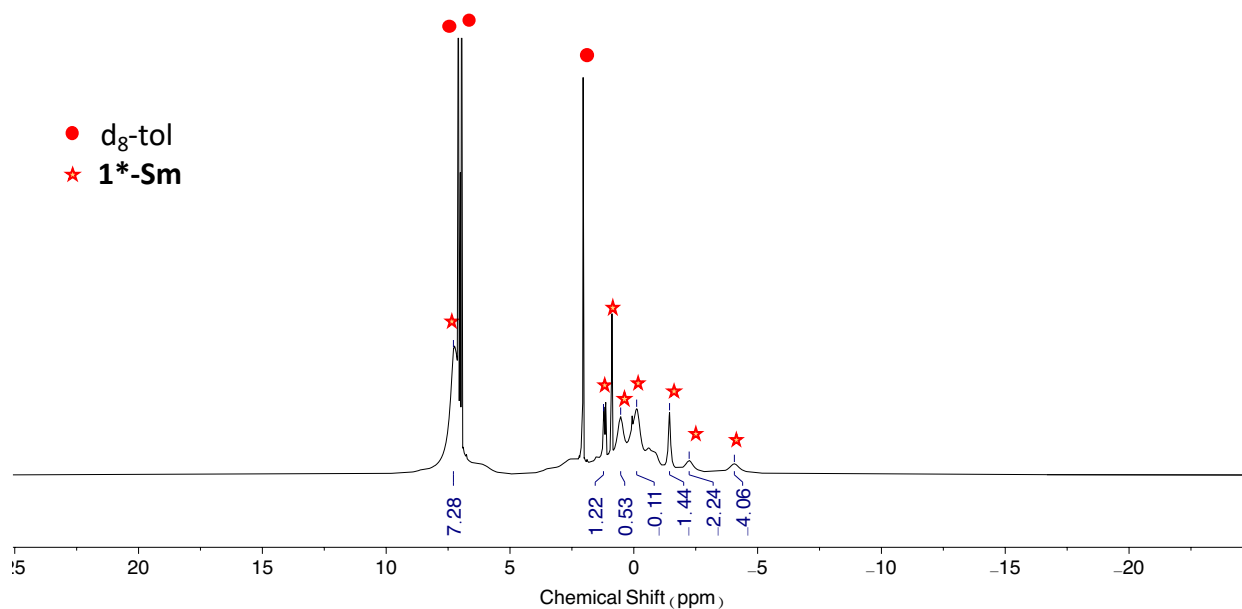

**Figure S46:**  $^1\text{H}$  NMR spectrum (400 MHz,  $\text{d}_8\text{-toluene}$ , 233 K) of crystals of **1\*-Sm** immediately after dissolution in toluene at -40 °C.

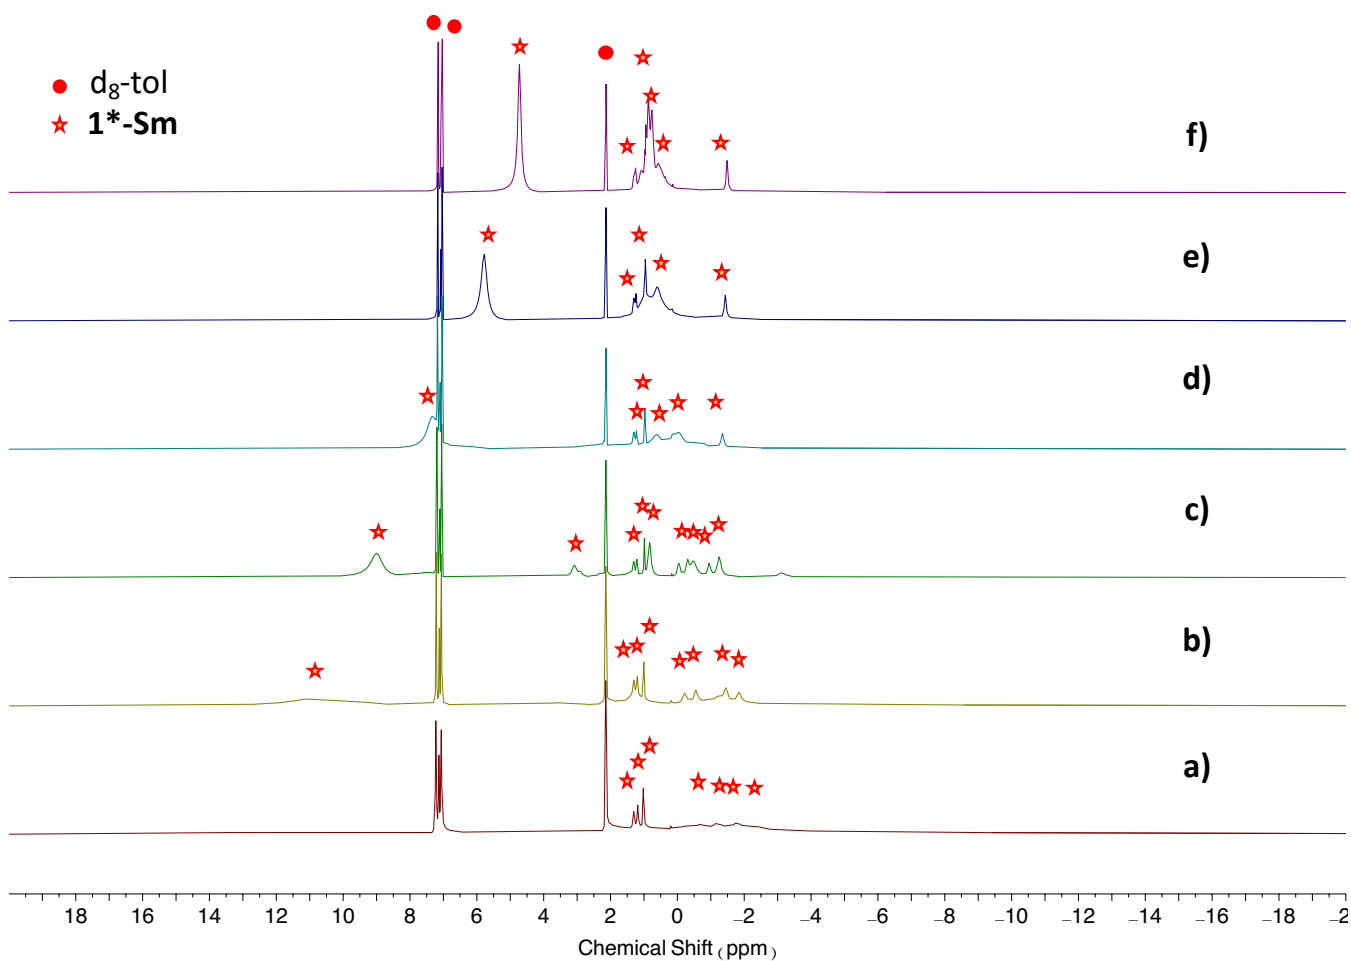

**Figure S47:** Variable temperature  $^1\text{H}$  NMR spectra (400 MHz,  $d_8$ -toluene) of crystals of  $1^*$ -Sm. a) 193 K, b) 203 K, c) 218 K, d) 233 K, e) 248 K, and f) 263 K immediately after dissolution in toluene at  $-40^\circ\text{C}$ .

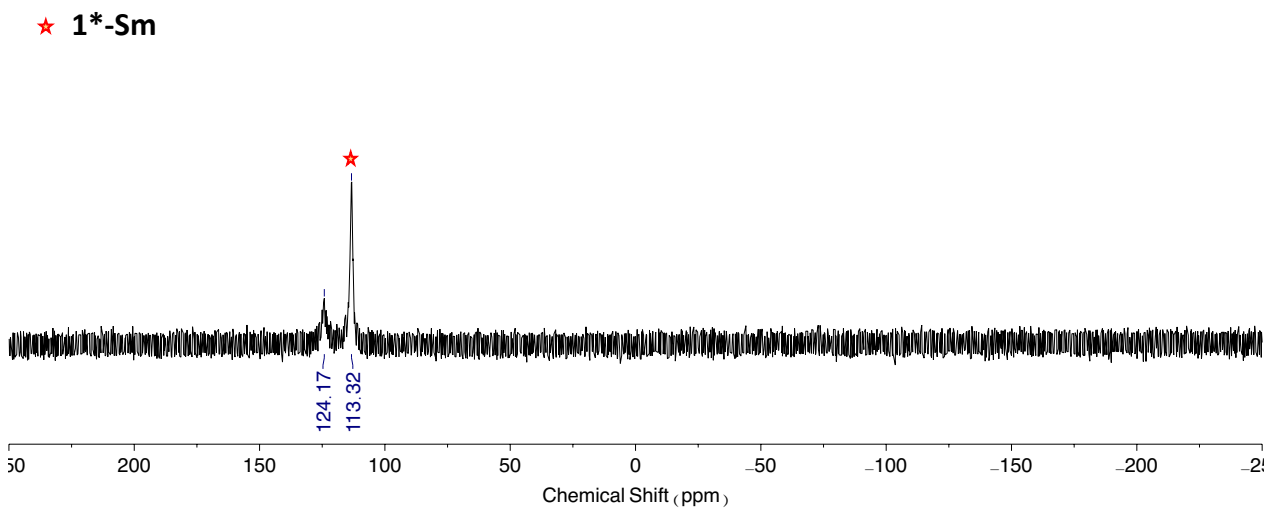

**Figure S48:**  $^{31}\text{P}\{^1\text{H}\}$  NMR spectrum (162 MHz,  $d_8$ -toluene, 233 K) of crystals of  $1^*$ -Sm immediately after dissolution in toluene at  $-40^\circ\text{C}$ .

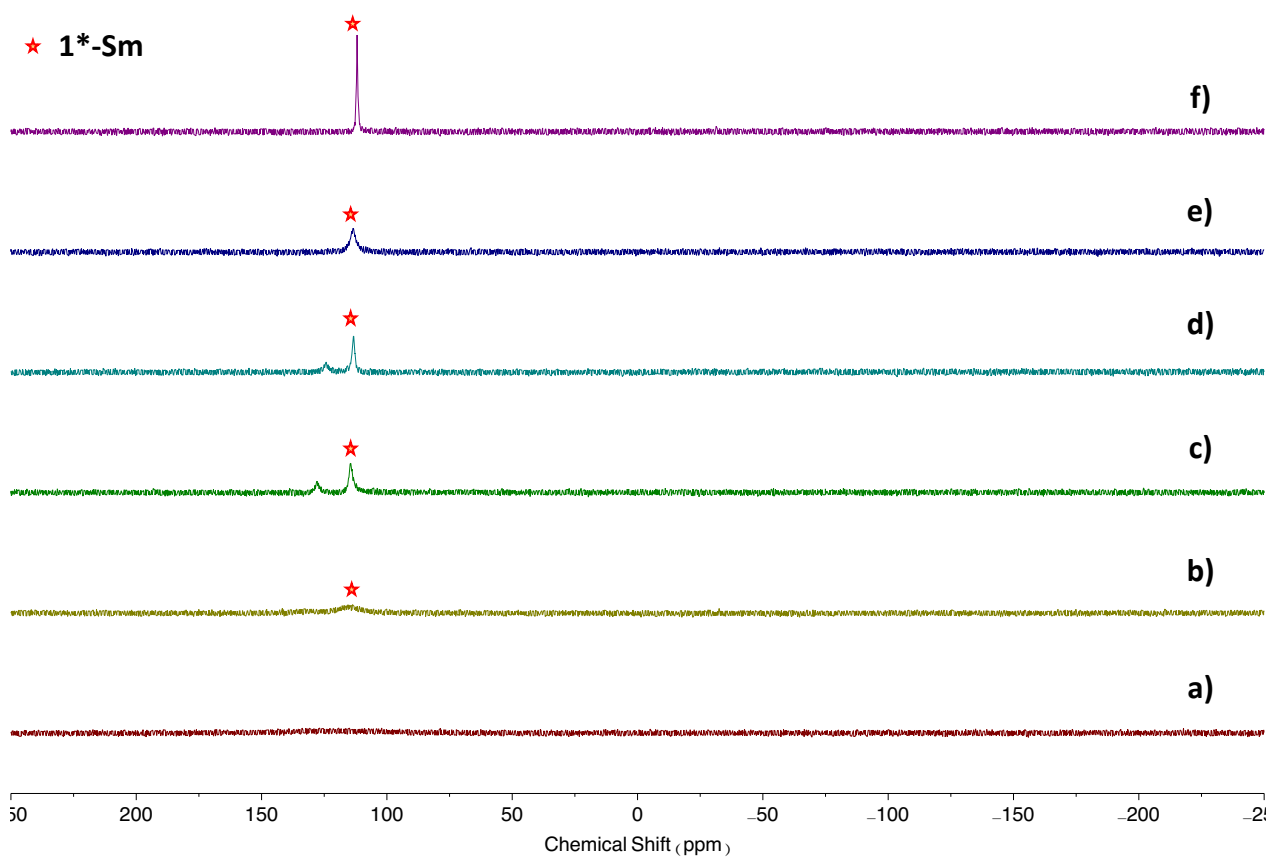

**Figure S49:** Variable temperature  $^{31}\text{P}\{^1\text{H}\}$  NMR spectra (162 MHz,  $d_8$ -toluene) of crystals of **1\*-Sm** a) 193 K, b) 203 K, c) 218 K, d) 233 K, e) 248 K, and f) 263 K immediately after dissolution in toluene at  $-40^\circ\text{C}$ .

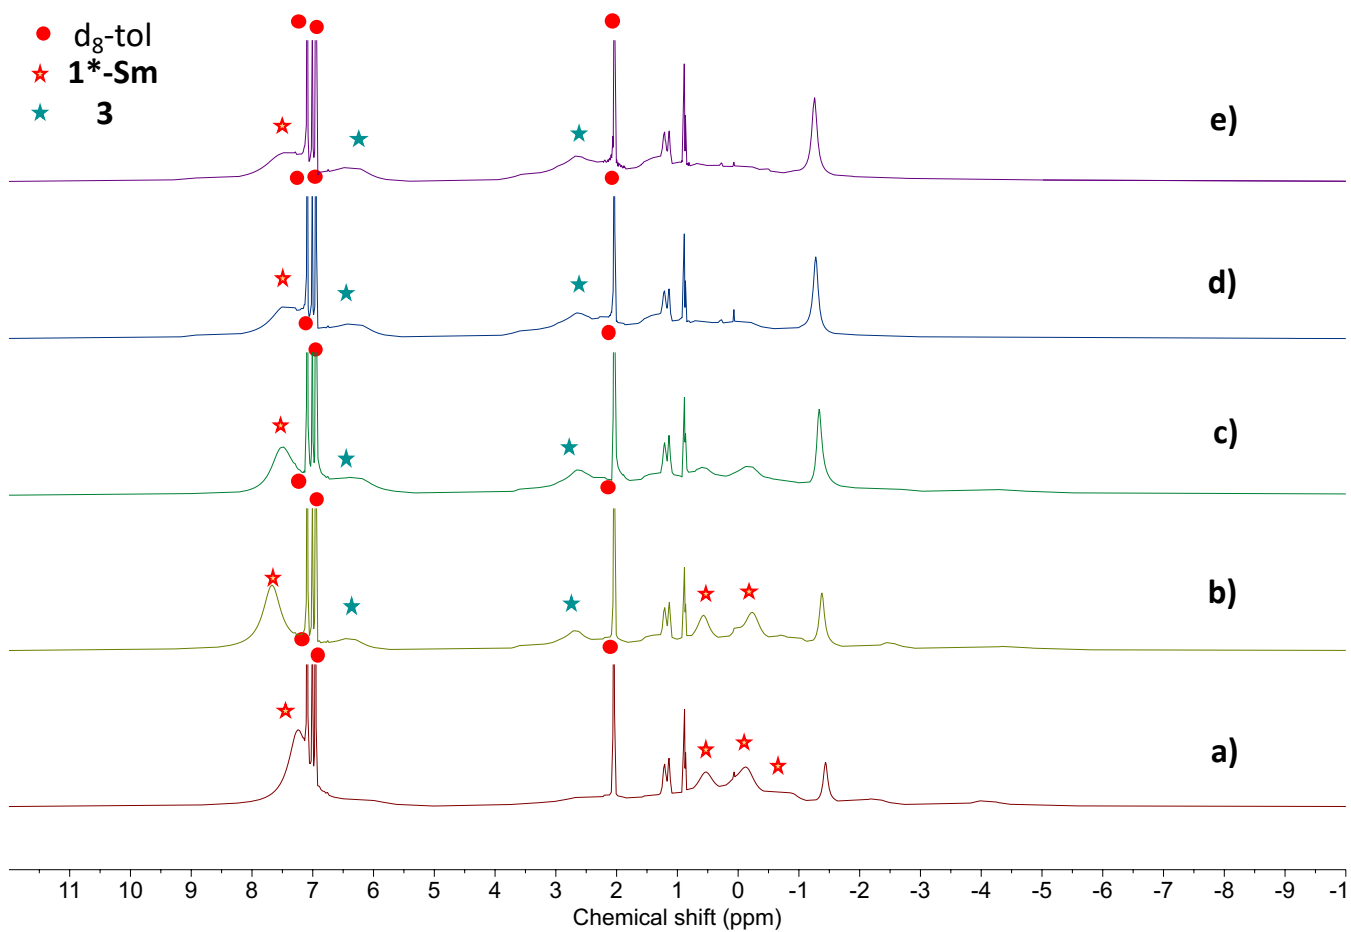

**Figure S50:**  $^1\text{H}$  NMR spectrum (400 MHz,  $d_8$ -toluene, 233 K) evolution of crystals of  $1^*$ -Sm in toluene solution a) immediately, b) after 24 h, c) after 5 days, d) after 14 days, and e) after 21 days at  $-40\text{ }^\circ\text{C}$ .



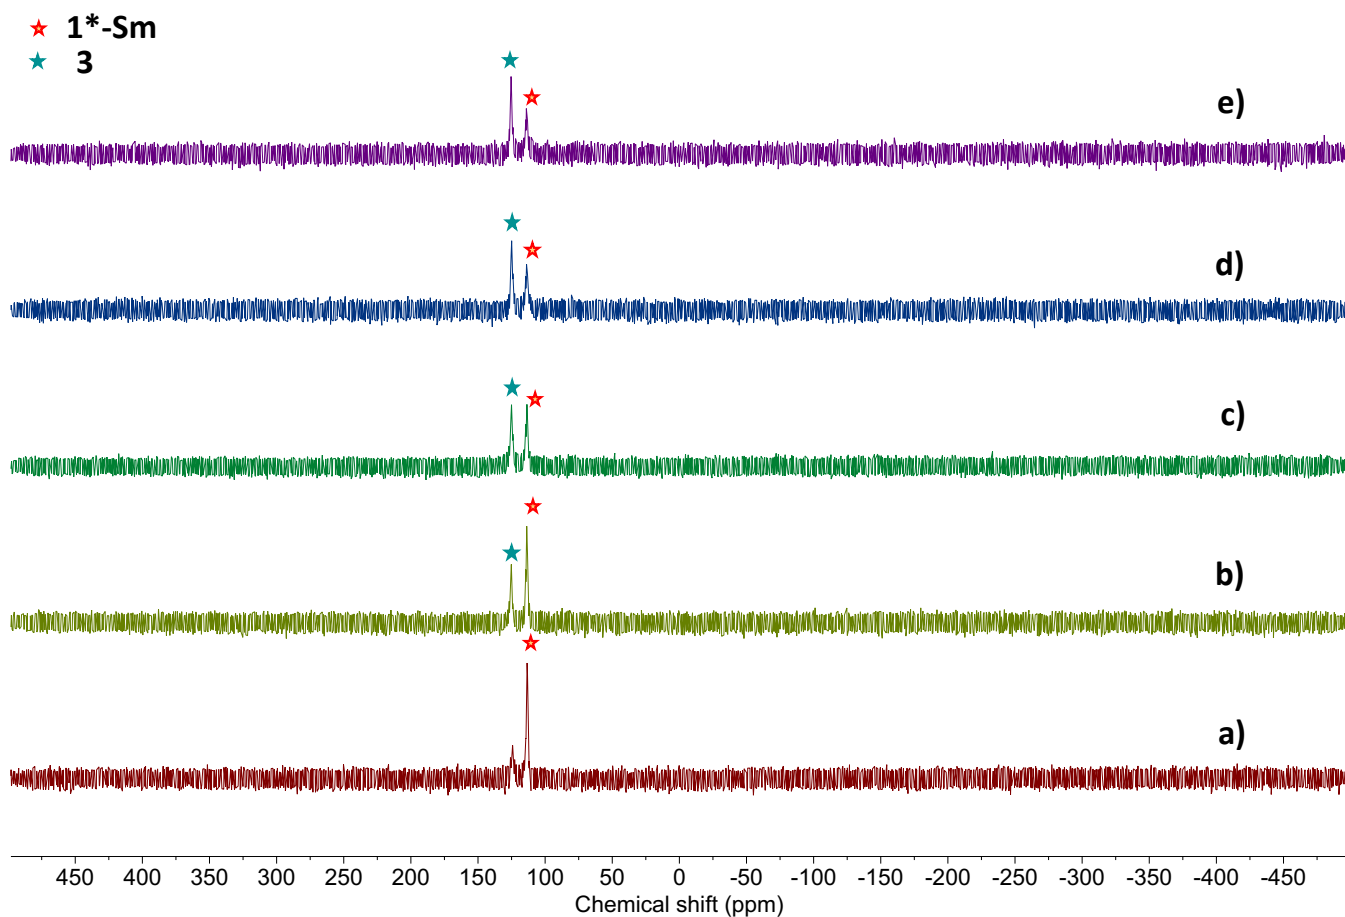

**Figure S51:**  $^{31}\text{P}\{^1\text{H}\}$  NMR spectrum (162 MHz,  $d_8$ -toluene, 233 K) evolution of crystals of **1<sup>\*</sup>-Sm** in toluene solution a) immediately, b) after 24 h, c) after 5 days, d) after 14 days, and e) after 21 days at  $-40\text{ }^\circ\text{C}$ .

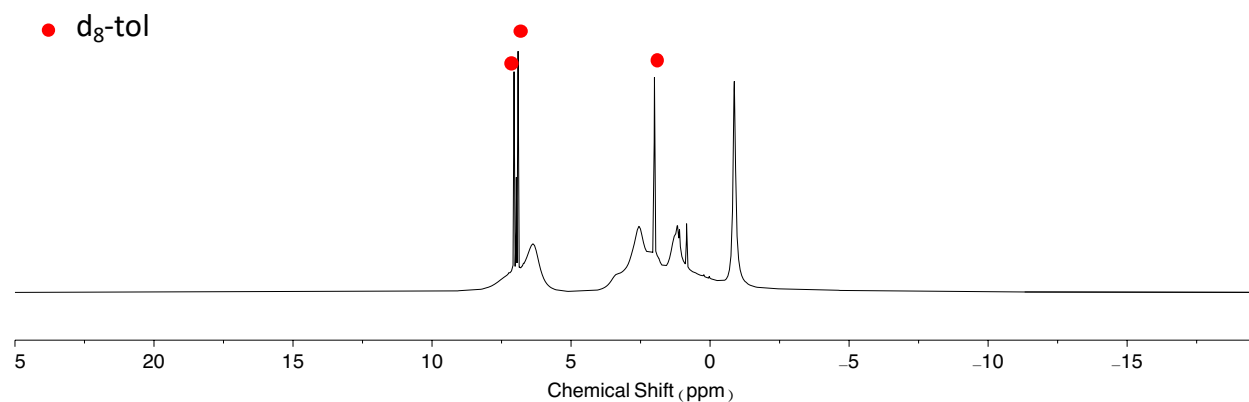

**Figure S52:**  $^1\text{H}$  NMR spectrum (400 MHz,  $d_8$ -toluene, 233 K) of the reaction mixture obtained after addition of **A** to  $[\text{Sm}^{\text{II}}\{\text{N}(\text{SiMe}_3)_2\}_2]_2$  in toluene at  $-40\text{ }^\circ\text{C}$  under Ar.

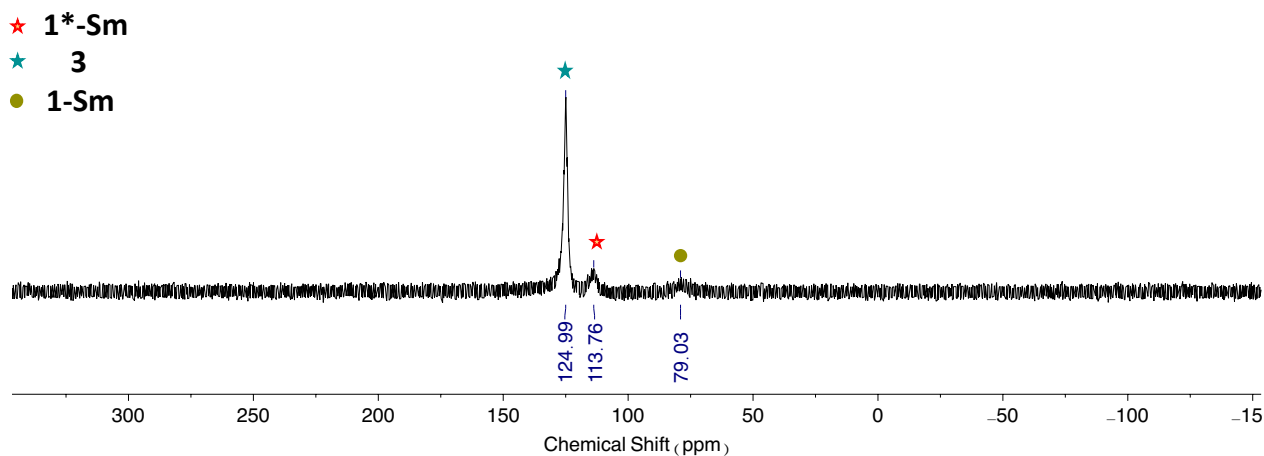

Figure S53:  $^{31}\text{P}\{^1\text{H}\}$  NMR spectrum (162 MHz,  $d_8$ -toluene, 233 K) of the reaction mixture obtained after addition of **A** to  $[\text{Sm}^{\text{II}}\{\text{N}(\text{SiMe}_3)_2\}_2]_2$  in toluene at  $-40^\circ\text{C}$  under Ar.

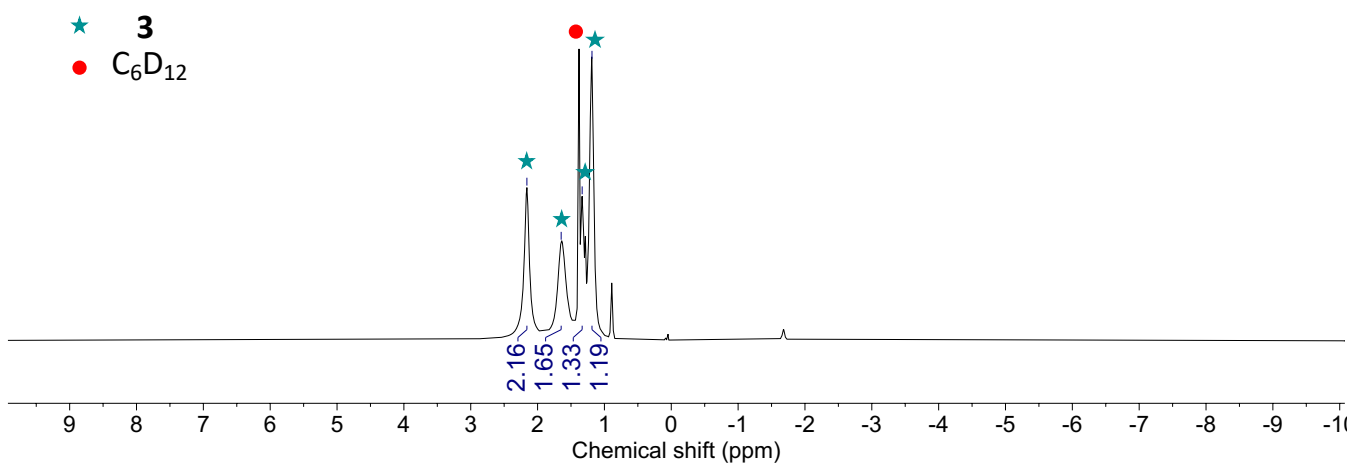

Figure S54:  $^1\text{H}$  NMR spectrum (400 MHz,  $\text{C}_6\text{D}_{12}$ , 298 K) of crystals of **3**.

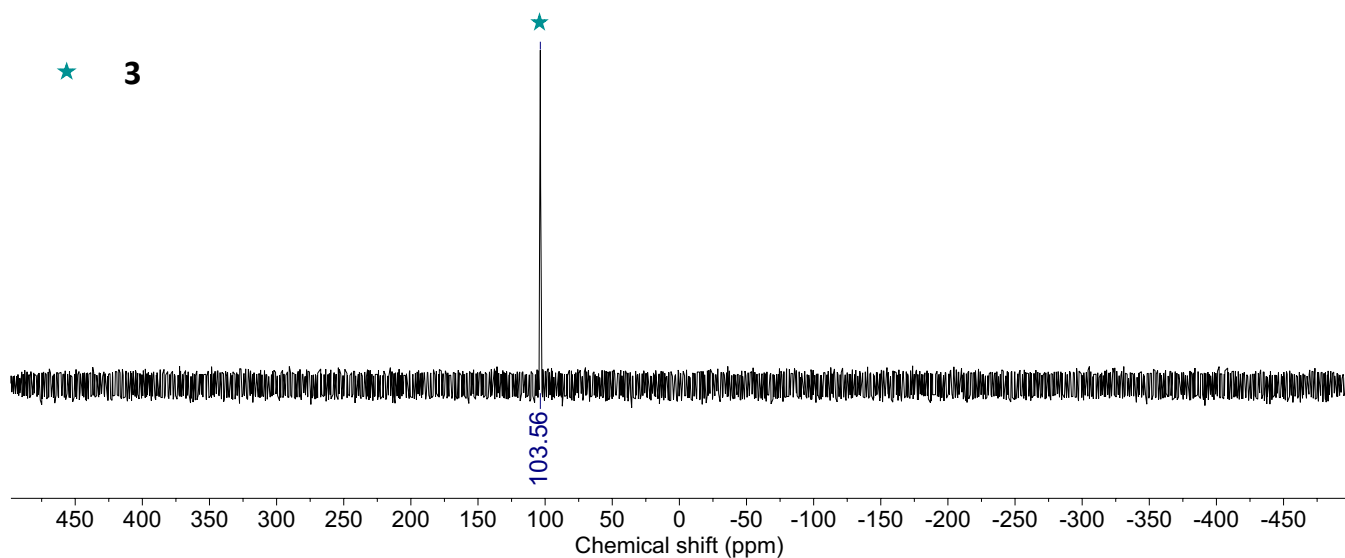

Figure S55:  $^{31}\text{P}\{^1\text{H}\}$  NMR spectrum (162 MHz,  $\text{C}_6\text{D}_{12}$ , 298 K) of crystals of **3**.

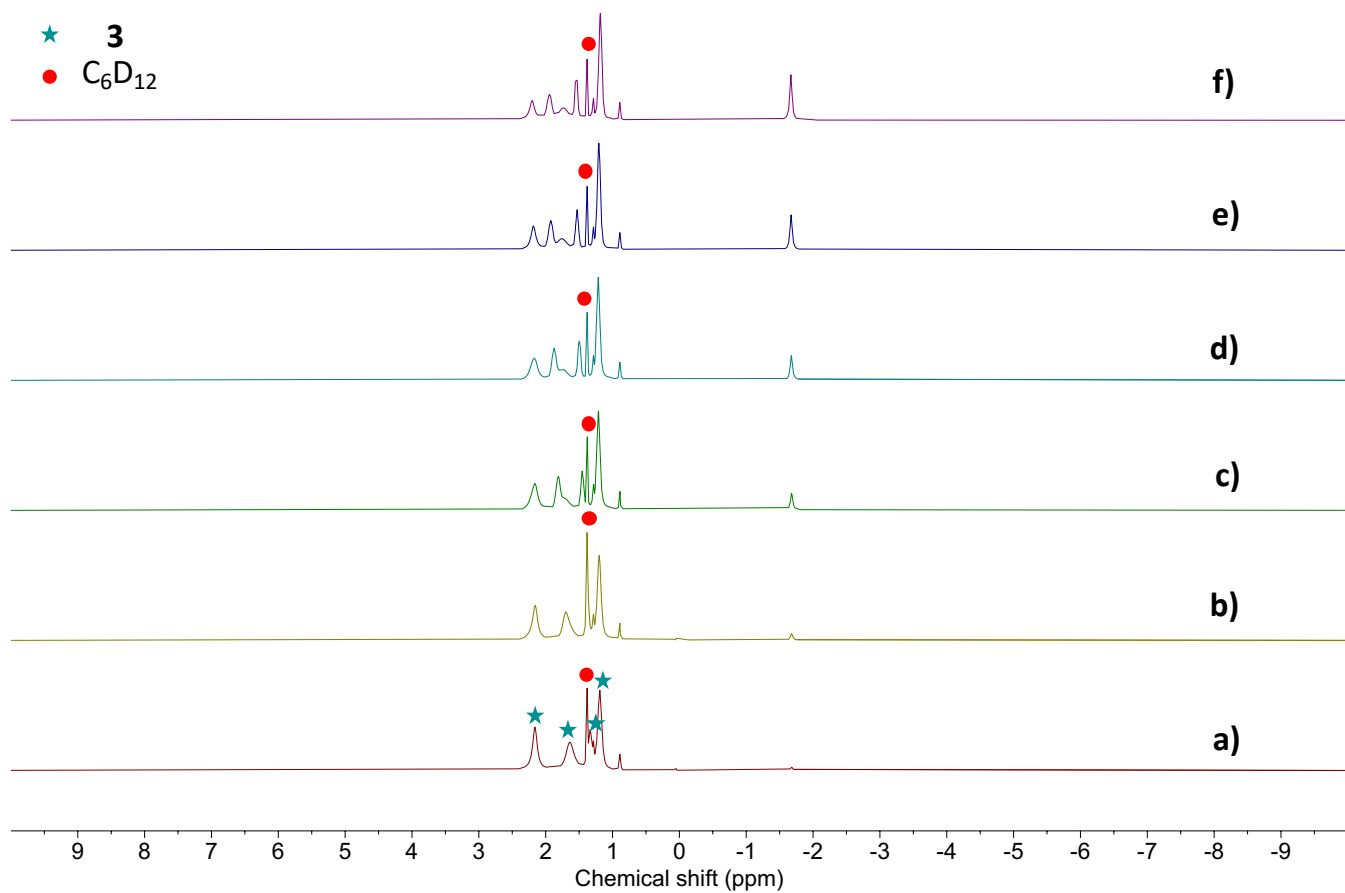

Figure S56:  $^1\text{H}$  NMR spectrum (400 MHz,  $\text{C}_6\text{D}_{12}$ , 298 K) evolution of crystals of **3** in cyclohexane solution a) immediately, b) after 3 h, c) after 24 h, d) after 2 days, e) after 4 days, and f) after 7 days at 25 °C.

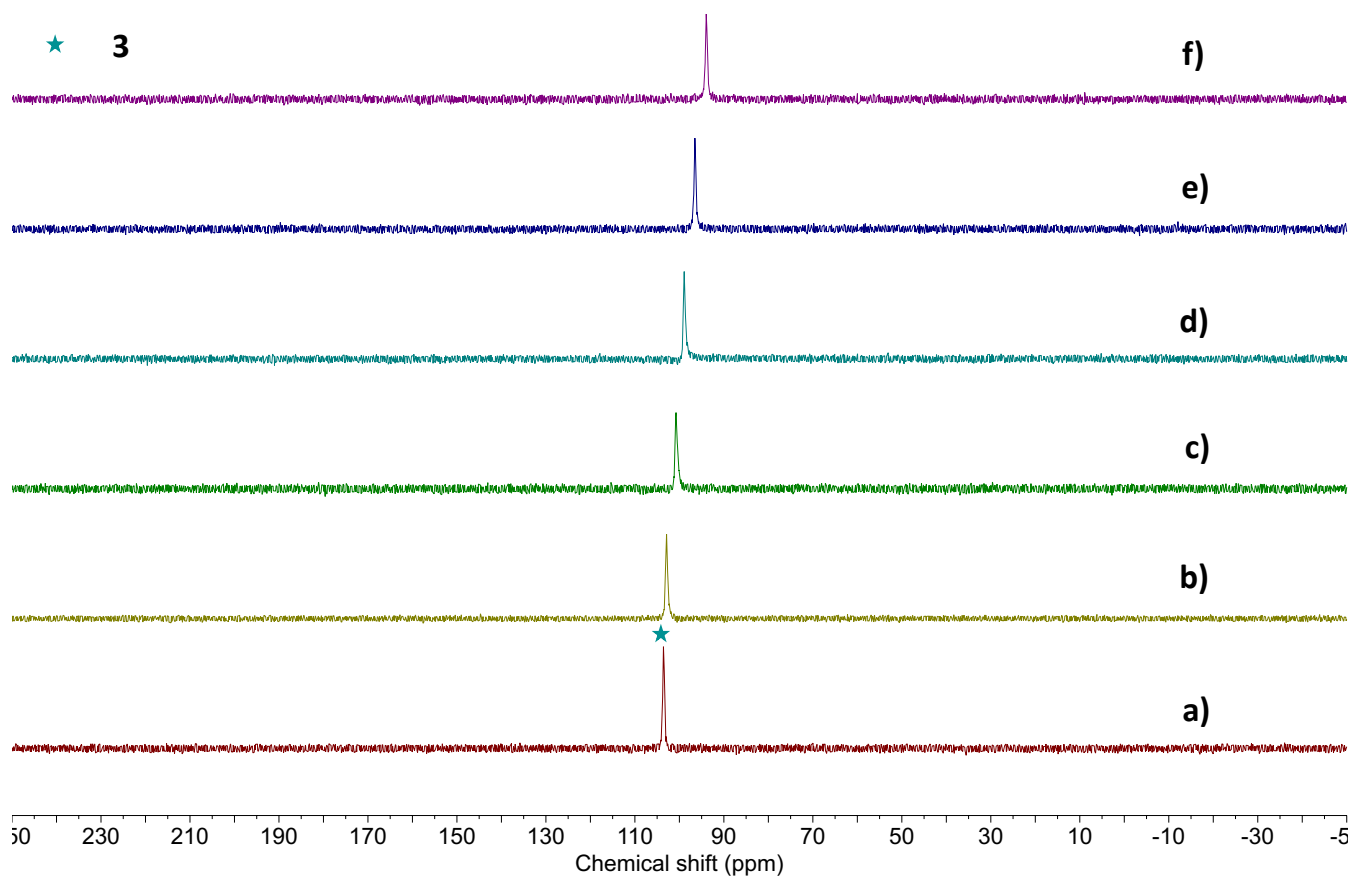

**Figure S57:**  $^{31}\text{P}\{^1\text{H}\}$  NMR spectrum (162 MHz,  $\text{C}_6\text{D}_{12}$ , 298 K) evolution of crystals of **3** in cyclohexane solution a) immediately, b) after 3 h, c) after 24 h, d) after 2 days, e) after 4 days, and f) after 7 days at 25 °C.

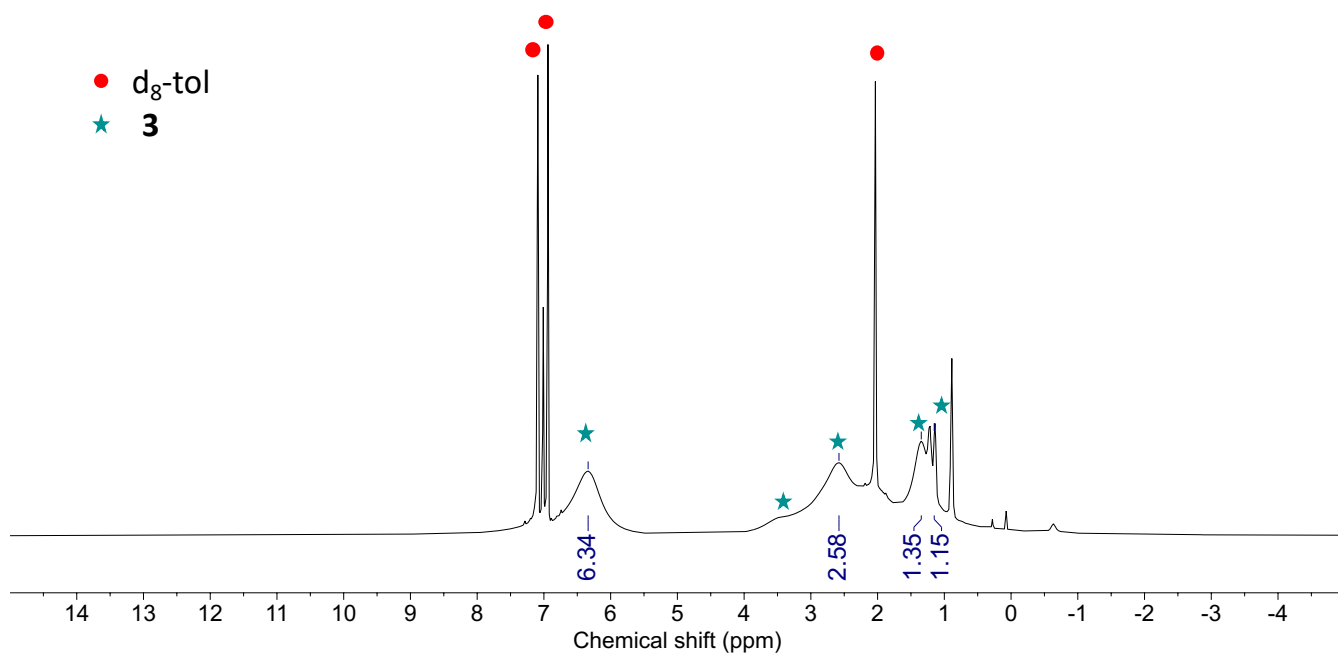

**Figure S58:**  $^1\text{H}$  NMR spectrum (400 MHz,  $d_8$ -toluene, 233 K) of crystals of **3**.

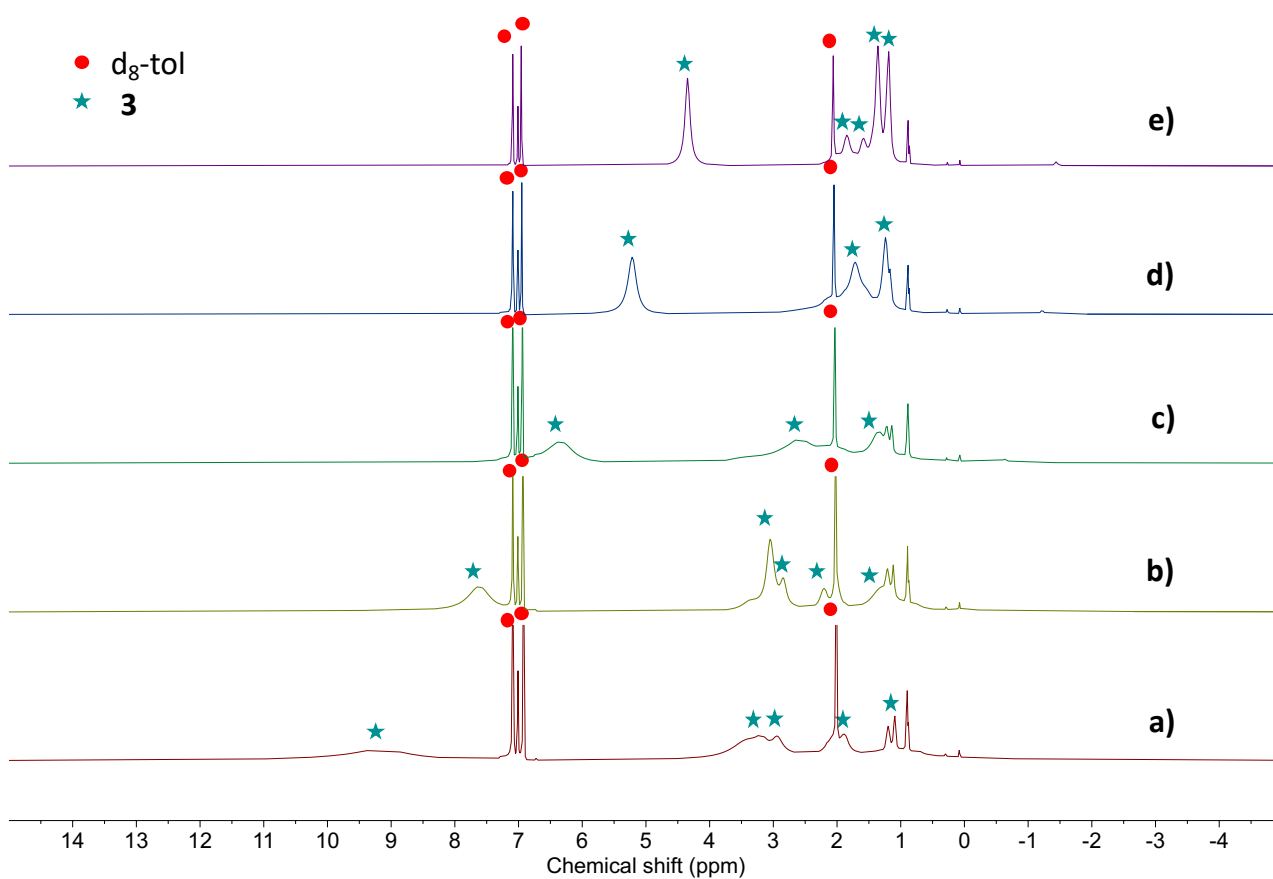

**Figure S59:** Variable temperature  $^1\text{H}$  NMR spectra (400 MHz,  $d_8$ -toluene) of crystals of **3** a) 203 K, b) 218 K, c) 233 K, d) 248 K, and e) 263 K.

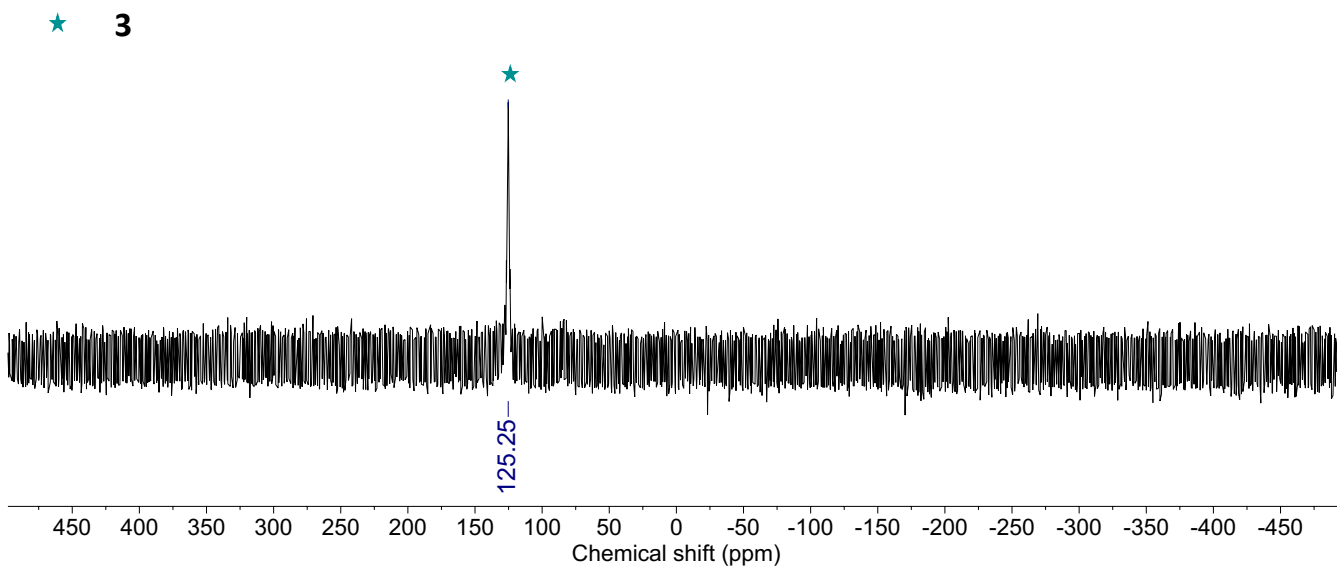

**Figure S60:**  $^{31}\text{P}\{^1\text{H}\}$  NMR spectrum (162 MHz,  $d_8$ -toluene, 233 K) of crystals of **3**.

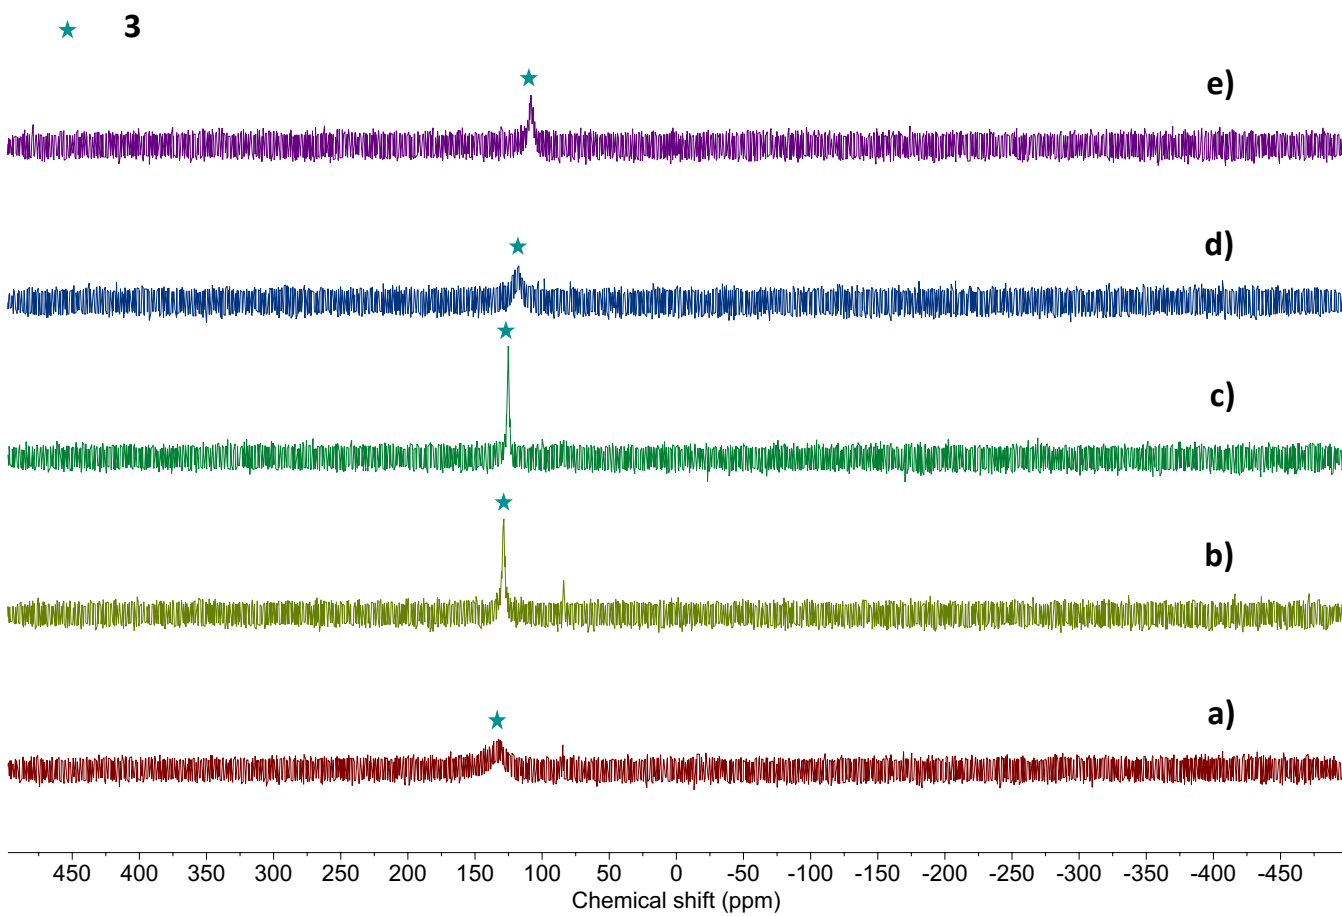

**Figure S61:** Variable temperature  $^{31}\text{P}\{^1\text{H}\}$  NMR spectra (162 MHz,  $d_8$ -toluene) of crystals of **3** a) 203 K, b) 218 K, c) 233 K, d) 248 K, and e) 263 K.

## X-ray crystallography

Suitable crystals were selected and mounted on various Rigaku diffractometers (XtaLAB Synergy R, DW system, HyPix-Arc 150 detector or SuperNova, Dual, Cu at home/near, AtlasS type detectors). The crystals were kept at a steady temperature during data collection. Data were measured using  $\omega$  scans with Cu K $\alpha$  radiation. The diffraction patterns were indexed and the total number of runs and images were based on the strategy calculation from the program CrysAlisPro 1.171.43.107a (Rigaku OD, 2024).<sup>10</sup> The unit cells were refined using CrysAlisPro 1.171.43.107a (Rigaku OD, 2024).<sup>10</sup> Data reduction, scaling and absorption corrections were performed using CrysAlisPro 1.171.43.107a (Rigaku OD, 2024).<sup>10</sup>

The structures were solved with the **ShelXT** (Sheldrick, 2015)<sup>11</sup> solution program using dual methods and by using **Olex2** 1.5 (Dolomanov et al., 2009)<sup>12</sup> as the graphical interface. The models were refined with **ShelXL** 2019/3 (Sheldrick, 2015)<sup>13</sup> using full matrix least squares minimisation on  $F^2$ . All non-hydrogen atoms were refined anisotropically. Hydrogen atom positions were calculated geometrically and refined using the riding model.

Several issues were encountered during the stages of the refinement of the 9 crystal structures presented in the main text. In case of compound **1-U**, disorder affected partially 1 ligand. The used restraints (SADI, SIMU) were employed to get acceptable geometric and anisotropic parameters. The data were also treated for twinning (BASF parameter = 0.2833(9)). The crystal structure of compound **2** shows some disorder dealing with the ligand. Some restraints were used (SADI, SIMU, ISOR) to obtain reasonable distances and ellipsoids. The data collection of compound **1-Ce** was treated for twinning (BASF parameter = 0.319(1)). The crystal structure of **1-Sm** needed a wide range of restraints (RIGU, DFIX, SADI, ISOR, DELU, SIMU) to get acceptable behavior for 1 Ligand. In the case of compound **1\*-Yb**, several restraints (SIMU, SADI, ISOR) were used to treat the disorder of the ligand and of the solvent.

| Compound                                        | <b>1-U</b>                                                                         | <b>2</b>                                                                          | <b>1-Ce</b>                                                                        | <b>1-Tm</b>                                                                        |
|-------------------------------------------------|------------------------------------------------------------------------------------|-----------------------------------------------------------------------------------|------------------------------------------------------------------------------------|------------------------------------------------------------------------------------|
| Formula                                         | C <sub>38</sub> H <sub>102</sub> FeN <sub>5</sub> P <sub>4</sub> Si <sub>6</sub> U | C <sub>62</sub> H <sub>111</sub> FeN <sub>2</sub> O <sub>3</sub> P <sub>4</sub> U | C <sub>38</sub> H <sub>102</sub> CeFeN <sub>5</sub> P <sub>4</sub> Si <sub>6</sub> | C <sub>38</sub> H <sub>102</sub> TmFeN <sub>5</sub> P <sub>4</sub> Si <sub>6</sub> |
| Crystal size [mm <sup>3</sup> ]                 | 0.35×0.09×0.07                                                                     | 0.21×0.09×0.08                                                                    | 0.52×0.11×0.10                                                                     | 0.28×0.24×0.19                                                                     |
| Crystal system                                  | triclinic                                                                          | orthorhombic                                                                      | triclinic                                                                          | monoclinic                                                                         |
| Space group                                     | P-1                                                                                | <i>P</i> 2 <sub>1</sub> 2 <sub>1</sub> 2 <sub>1</sub>                             | P-1                                                                                | <i>P</i> 2 <sub>1</sub> / <i>n</i>                                                 |
| V [Å <sup>3</sup> ]                             | 5961.05(17)                                                                        | 6680.19(11)                                                                       | 5973.4(2)                                                                          | 5865.83(14)                                                                        |
| a [Å]                                           | 11.55749(16)                                                                       | 16.81721(16)                                                                      | 11.56977(16)                                                                       | 11.60150(16)                                                                       |
| b [Å]                                           | 19.2532(3)                                                                         | 19.7326(2)                                                                        | 19.2708(5)                                                                         | 18.3958(2)                                                                         |
| c [Å]                                           | 27.3197(5)                                                                         | 20.13034(17)                                                                      | 27.3324(7)                                                                         | 27.5562(4)                                                                         |
| α [°]                                           | 78.7323(15)                                                                        | 90                                                                                | 78.622(2)                                                                          | 90                                                                                 |
| β [°]                                           | 89.4820(13)                                                                        | 90                                                                                | 89.5036(15)                                                                        | 94.1162(12)                                                                        |
| γ [°]                                           | 89.0470(12)                                                                        | 90                                                                                | 89.1024(16)                                                                        | 90                                                                                 |
| Z                                               | 4                                                                                  | 4                                                                                 | 4                                                                                  | 4                                                                                  |
| Absorption coefficient [mm <sup>-1</sup> ]      | 11.923                                                                             | 9.726                                                                             | 1.243                                                                              | 7.159                                                                              |
| F (000)                                         | 2508.0                                                                             | 2796.0                                                                            | 2372.0                                                                             | 2416.0                                                                             |
| T [K]                                           | 140.00(10)                                                                         | 140.00(10)                                                                        | 140.00(10)                                                                         | 139.99(10)                                                                         |
| Total no. reflexions                            | 43530                                                                              | 41209                                                                             | 28872                                                                              | 62660                                                                              |
| Unique reflexions [R(int)]                      | 23035 [0.0377]                                                                     | 13920 [0.0331]                                                                    | 28872 [-]                                                                          | 12041                                                                              |
| Final R indice [I>2σ(I)]                        | 0.0306                                                                             | 0.0263                                                                            | 0.0645                                                                             | 0.0421                                                                             |
| Largest diff. peak and hole [eÅ <sup>-3</sup> ] | 1.116<br>and -1.177                                                                | 0.981<br>and -0.674                                                               | 2.604<br>and -1.990                                                                | 1.581<br>and -1.135                                                                |
| Goof                                            | 1.008                                                                              | 1.091                                                                             | 1.040                                                                              | 1.046                                                                              |
| CCDC number                                     | 2330344                                                                            | 2330342                                                                           | 2330341                                                                            | 2330340                                                                            |

**Table S1.** X-ray crystallographic data for **1-U**, **2**, **1-Ce**, and **1-Tm**.



| Compound                                        | <b>1-Sm</b>                                                                         | <b>1*-Yb(thf)<sub>0.4</sub>(Et<sub>2</sub>O)<sub>0.6</sub></b>                        | <b>1-Dy</b>                                                                        |
|-------------------------------------------------|-------------------------------------------------------------------------------------|---------------------------------------------------------------------------------------|------------------------------------------------------------------------------------|
| Formula                                         | C <sub>38</sub> H <sub>102</sub> FeN <sub>5</sub> P <sub>4</sub> Si <sub>6</sub> Sm | C <sub>36</sub> H <sub>93.2</sub> FeN <sub>4</sub> OP <sub>4</sub> Si <sub>4</sub> Yb | C <sub>38</sub> H <sub>102</sub> DyFeN <sub>5</sub> P <sub>4</sub> Si <sub>6</sub> |
| Crystal size [mm <sup>3</sup> ]                 | 0.31×0.16×0.13                                                                      | 0.52×0.29×0.23                                                                        | 0.26×0.13×0.12                                                                     |
| Crystal system                                  | monoclinic                                                                          | monoclinic                                                                            | monoclinic                                                                         |
| Space group                                     | <i>P2<sub>1</sub>/n</i>                                                             | <i>P2<sub>1</sub>/n</i>                                                               | <i>P2<sub>1</sub>/n</i>                                                            |
| V [Å <sup>3</sup> ]                             | 5930.7(4)                                                                           | 5514.23(12)                                                                           | 5915.5(5)                                                                          |
| a [Å]                                           | 11.8173(5)                                                                          | 10.35562(15)                                                                          | 11.6319(5)                                                                         |
| b [Å]                                           | 18.0593(7)                                                                          | 36.8715(3)                                                                            | 18.3899(9)                                                                         |
| c [Å]                                           | 27.8343(12)                                                                         | 14.64313(18)                                                                          | 27.7329(15)                                                                        |
| α [°]                                           | 90                                                                                  | 90                                                                                    | 90                                                                                 |
| β [°]                                           | 93.235(4)                                                                           | 99.5143(13)                                                                           | 94.323(4)                                                                          |
| γ [°]                                           | 90                                                                                  | 90                                                                                    | 90                                                                                 |
| Z                                               | 4                                                                                   | 4                                                                                     | 4                                                                                  |
| Absorption coefficient [mm <sup>-1</sup> ]      | 11.715                                                                              | 7.304                                                                                 | 11.048                                                                             |
| F (000)                                         | 2388.0                                                                              | 2228.8                                                                                | 2404.0                                                                             |
| T [K]                                           | 140.00(10)                                                                          | 200.07(16)                                                                            | 139.99(10)                                                                         |
| Total no. reflexions                            | 94924                                                                               | 65865                                                                                 | 47358                                                                              |
| Unique reflexions [R(int)]                      | 11946 [0.0752]                                                                      | 11541 [0.0351]                                                                        | 11642 [0.1327]                                                                     |
| Final R indice [ <i>I</i> >2σ( <i>I</i> )]      | 0.0659                                                                              | 0.0314                                                                                | 0.0603                                                                             |
| Largest diff. peak and hole [eÅ <sup>-3</sup> ] | 2.028<br>and -1.098                                                                 | 0.956<br>and -0.592                                                                   | 1.734<br>and -0.725                                                                |
| Goof                                            | 1.081                                                                               | 1.066                                                                                 | 0.867                                                                              |
| CCDC number                                     | 2330343                                                                             | 2331570                                                                               | 2330345                                                                            |

**Table S2.** X-ray crystallographic data for **1-Sm**, **1-Dy** and **1\*-Yb**.

| Compound                                        | <b>1*-Sm</b>                                                                       | <b>3</b>                                                                                          |
|-------------------------------------------------|------------------------------------------------------------------------------------|---------------------------------------------------------------------------------------------------|
| Formula                                         | C <sub>32</sub> H <sub>84</sub> FeN <sub>4</sub> P <sub>4</sub> Si <sub>4</sub> Sm | C <sub>55</sub> H <sub>139</sub> Fe <sub>2</sub> N <sub>6</sub> P <sub>8</sub> Si <sub>4</sub> Sm |
| Crystal size [mm <sup>3</sup> ]                 | 0.31×0.22×0.18                                                                     | 0.21×0.07×0.06                                                                                    |
| Crystal system                                  | orthorhombic                                                                       | monoclinic                                                                                        |
| Space group                                     | <i>Pbca</i>                                                                        | <i>P2<sub>1</sub>/c</i>                                                                           |
| V [Å <sup>3</sup> ]                             | 10243.3(4)                                                                         | 7905.9(5)                                                                                         |
| a [Å]                                           | 20.9865(4)                                                                         | 11.4532(5)                                                                                        |
| b [Å]                                           | 19.1066(5)                                                                         | 29.5233(9)                                                                                        |
| c [Å]                                           | 25.5457(5)                                                                         | 23.5755(8)                                                                                        |
| α [°]                                           | 90                                                                                 | 90                                                                                                |
| β [°]                                           | 90                                                                                 | 97.369(4)                                                                                         |
| γ [°]                                           | 90                                                                                 | 90                                                                                                |
| Z                                               | 8                                                                                  | 4                                                                                                 |
| Absorption coefficient [mm <sup>-1</sup> ]      | 13.044                                                                             | 10.776                                                                                            |
| F (000)                                         | 4064.0                                                                             | 3204.0                                                                                            |
| T [K]                                           | 200.15                                                                             | 140.00(10)                                                                                        |
| Total no. reflexions                            | 34072                                                                              | 37561                                                                                             |
| Unique reflexions [R(int)]                      | 9892 [0.0445]                                                                      | 15331 [0.1009]                                                                                    |
| Final R indice [ <i>I</i> >2σ( <i>I</i> )]      | 0.0378                                                                             | 0.0585                                                                                            |
| Largest diff. peak and hole [eÅ <sup>-3</sup> ] | 0.960<br>and -0.336                                                                | 0.992<br>and -0.594                                                                               |
| GooF                                            | 1.020                                                                              | 0.976                                                                                             |
| CCDC number                                     | 2331569                                                                            | 2330339                                                                                           |

**Table S3.** X-ray crystallographic data for **1\*-Sm** and **3**.

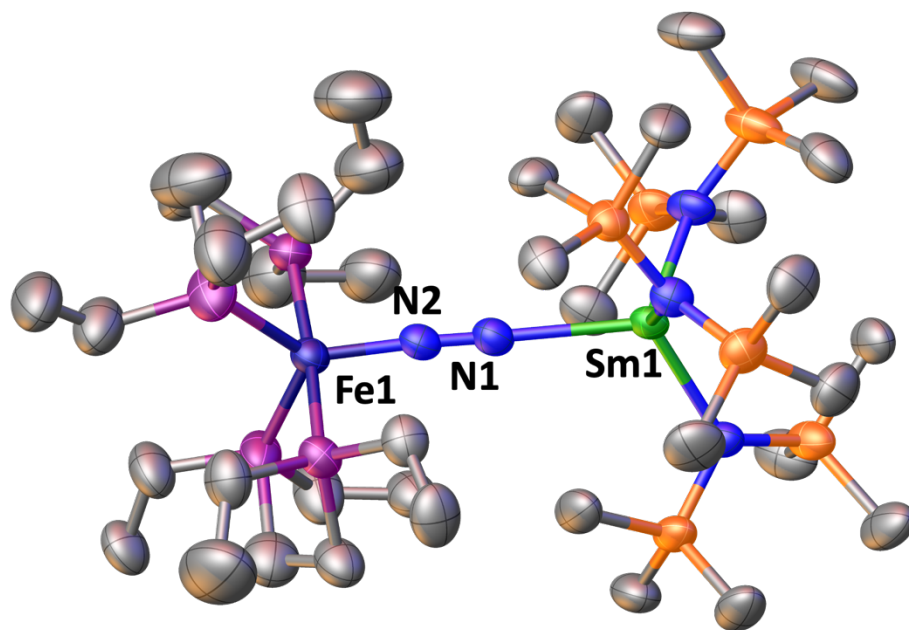

**Figure S62:** Solid-state molecular structure of **1-Sm** with 50% probability ellipsoids. Color code: samarium (light green), phosphorus (purple), iron (midnight blue), carbon (grey), silicon (orange). Hydrogen atoms were omitted for clarity.

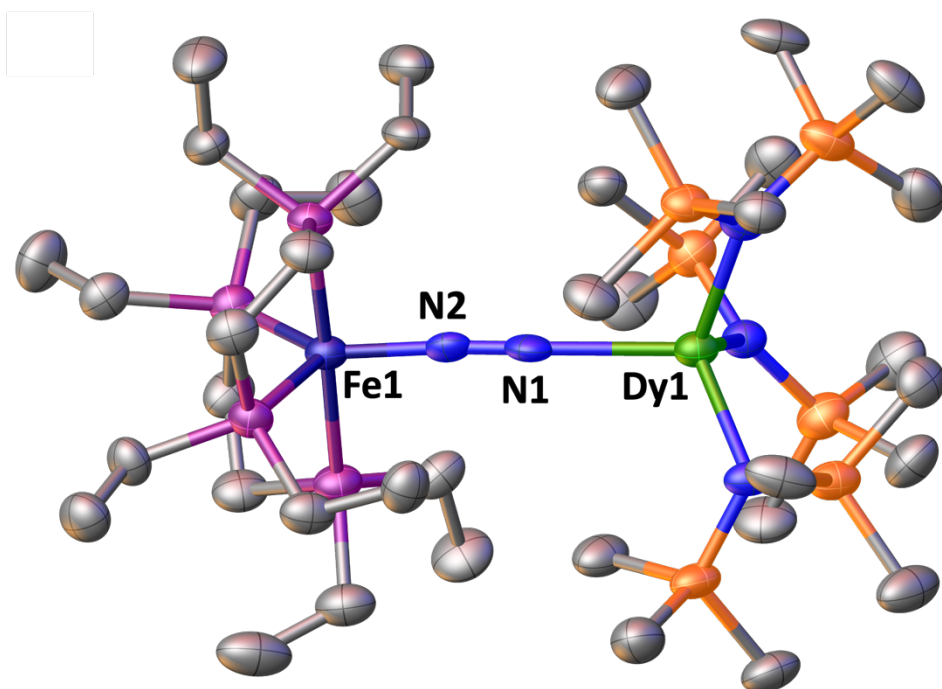

**Figure S63:** Solid-state molecular structure of **1-Dy** with 50% probability ellipsoids. Color code: dysprosium (light green), phosphorus (purple), iron (midnight blue), carbon (grey), silicon (orange). Hydrogen atoms were omitted for clarity.

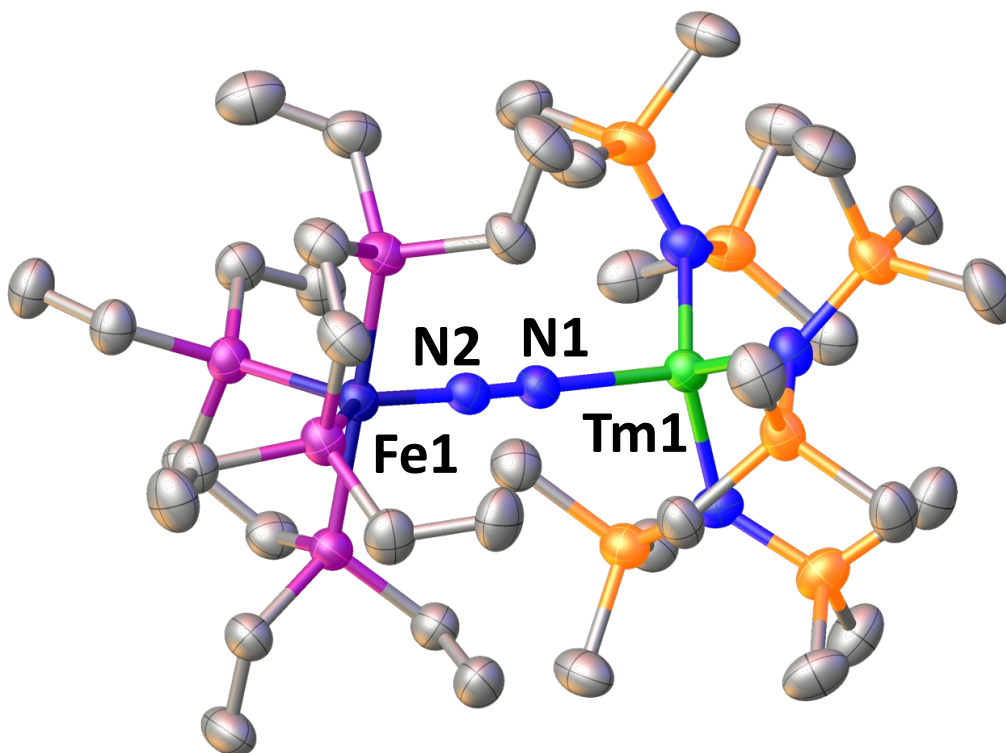

**Figure S64:** Solid-state molecular structure of **1-Tm** with 50% probability ellipsoids. Color code: thulium (light green), phosphorus (purple), iron (midnight blue), carbon (grey), silicon (orange). Hydrogen atoms were omitted for clarity.

EPR data

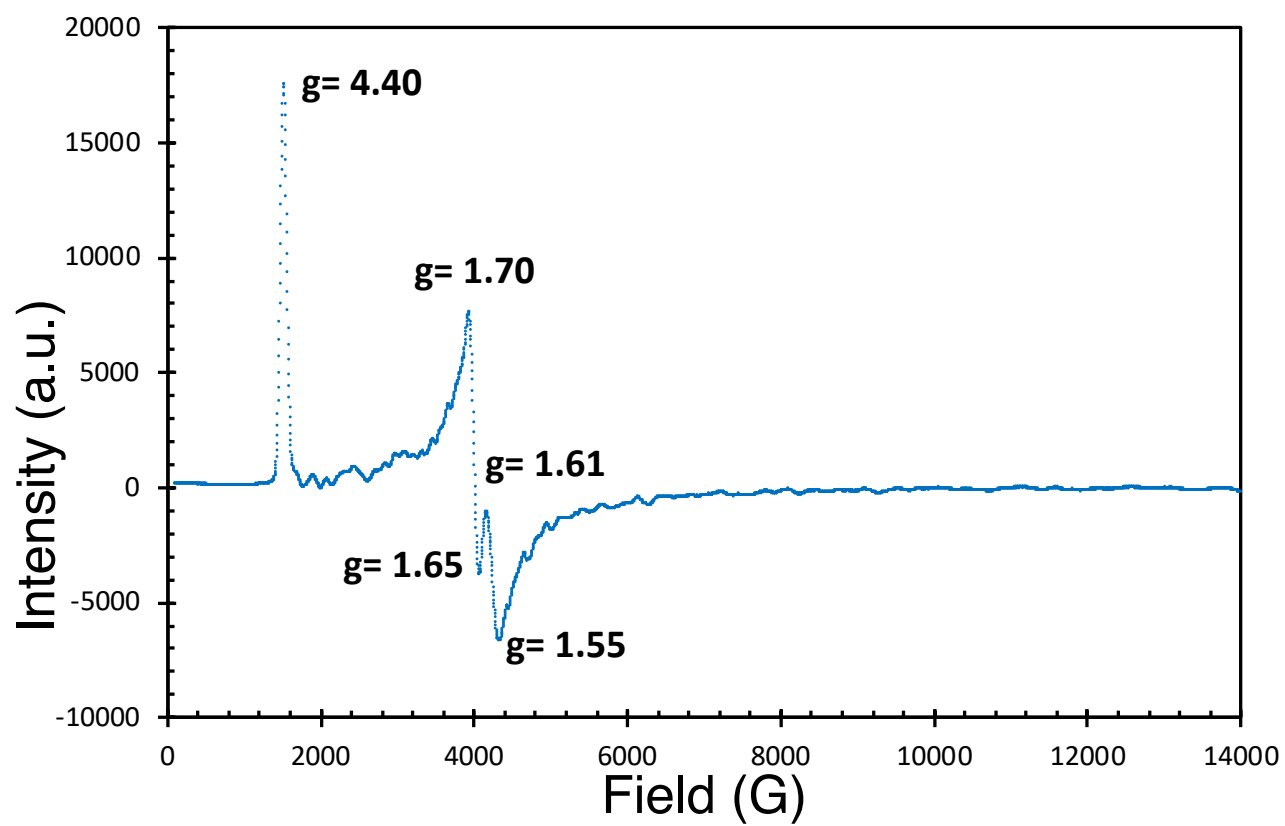

Figure S65: X-band EPR spectrum of pure powder of **1-U** at 6 K. ( $\nu = 9.397400$  GHz,  $P = 0.6332$  mW, amplitude modulation 5 G, frequency modulation 100 kHz).

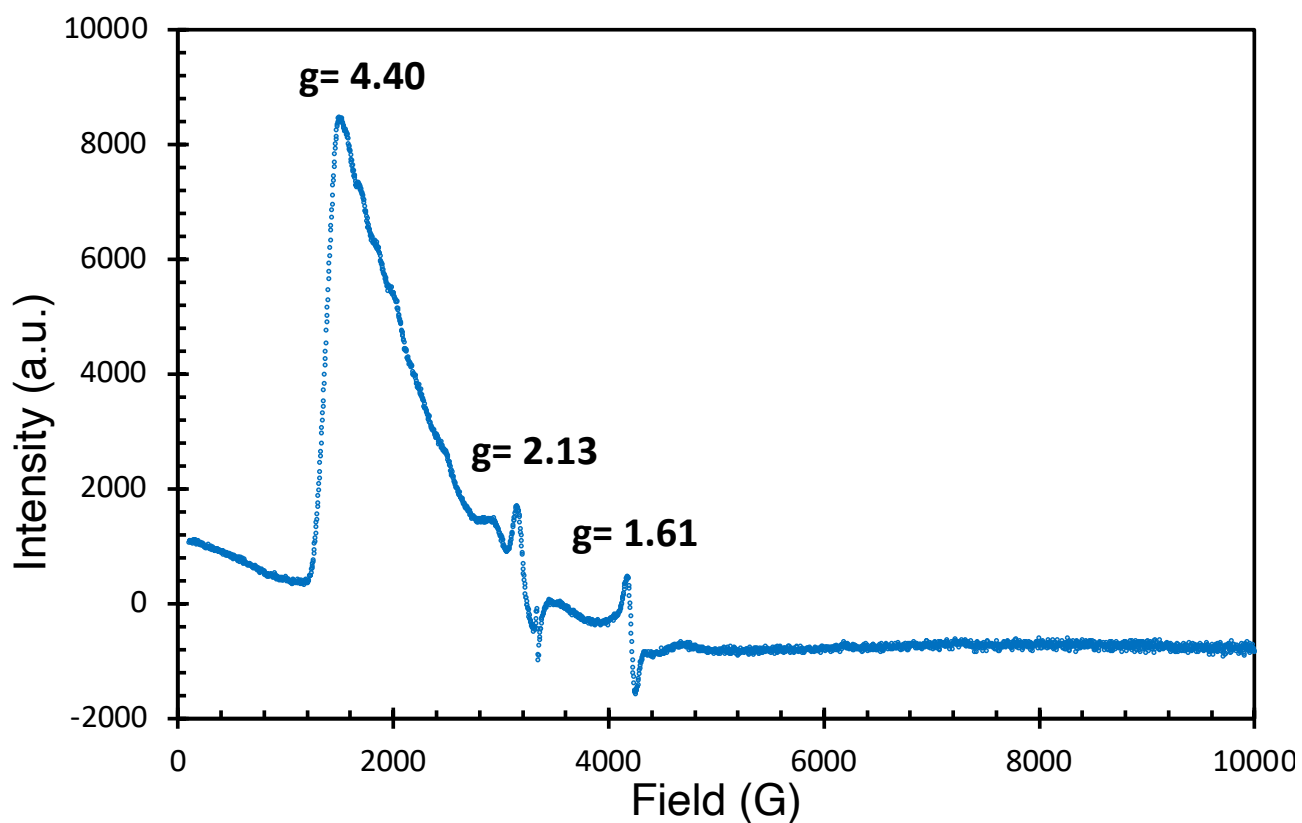

**Figure S66:** X-band EPR spectrum of a 20 mM frozen solution of **1-U** in a Hex:Tol (1:1) glass at 6 K. ( $\nu = 9.397400$  GHz,  $P = 0.6332$  mW, amplitude modulation 5 G, frequency modulation 100 kHz).

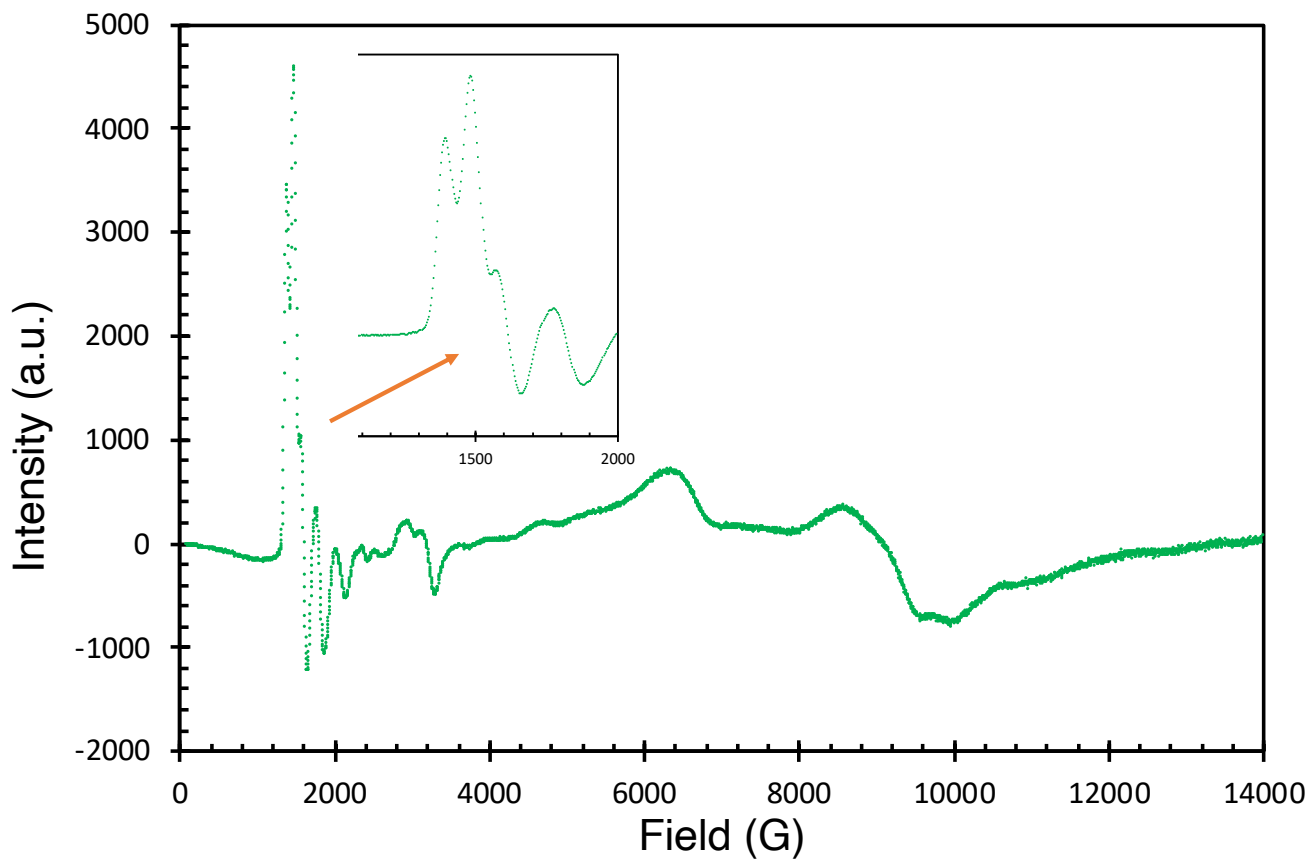

**Figure S67:** X-band EPR spectrum of pure powder of **2** at 6 K. ( $\nu = 9.397400$  GHz,  $P = 0.6332$  mW, amplitude modulation 5 G, frequency modulation 100 kHz).

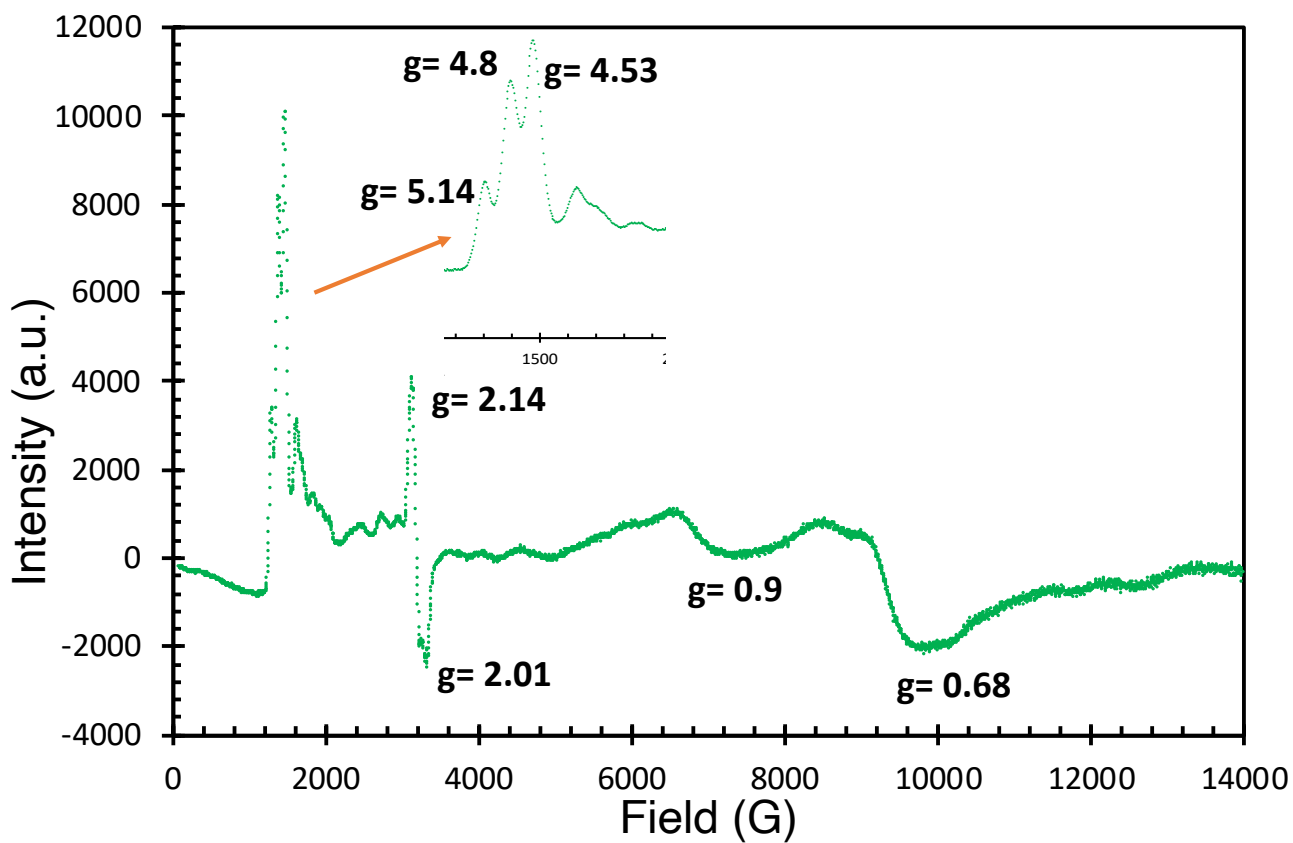

**Figure S68:** X-band EPR spectrum of a 20 mM frozen solution of **2** in a Hex:Tol (1:1) glass at 6 K. ( $\nu = 9.397400$  GHz,  $P = 0.6332$  mW, amplitude modulation 5 G, frequency modulation 100 kHz).



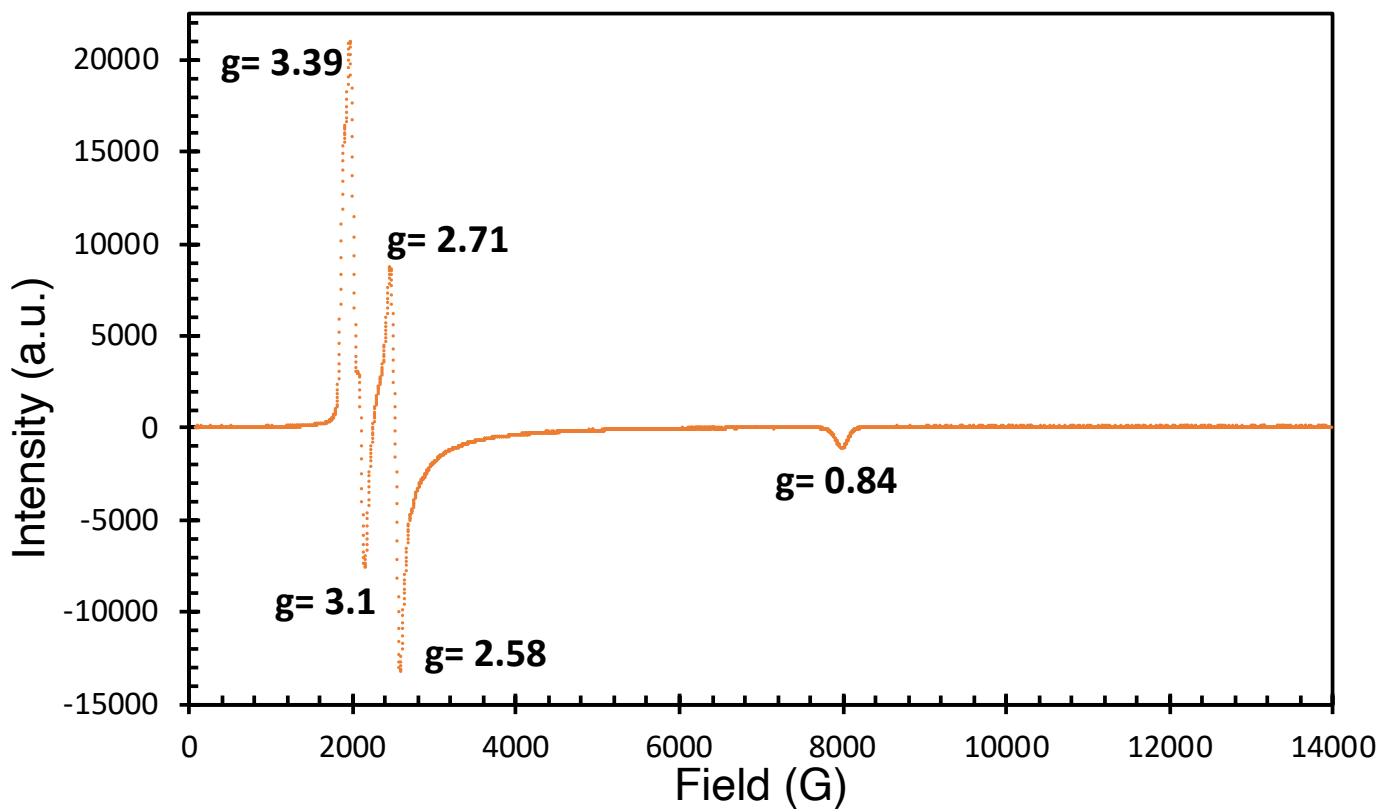

**Figure S69:** X-band EPR spectrum of pure powder of  $[U(ODtbp)_3]$  at 6 K. ( $\nu = 9.397400$  GHz,  $P = 0.006332$  mW, amplitude modulation 5 G, frequency modulation 100 kHz).

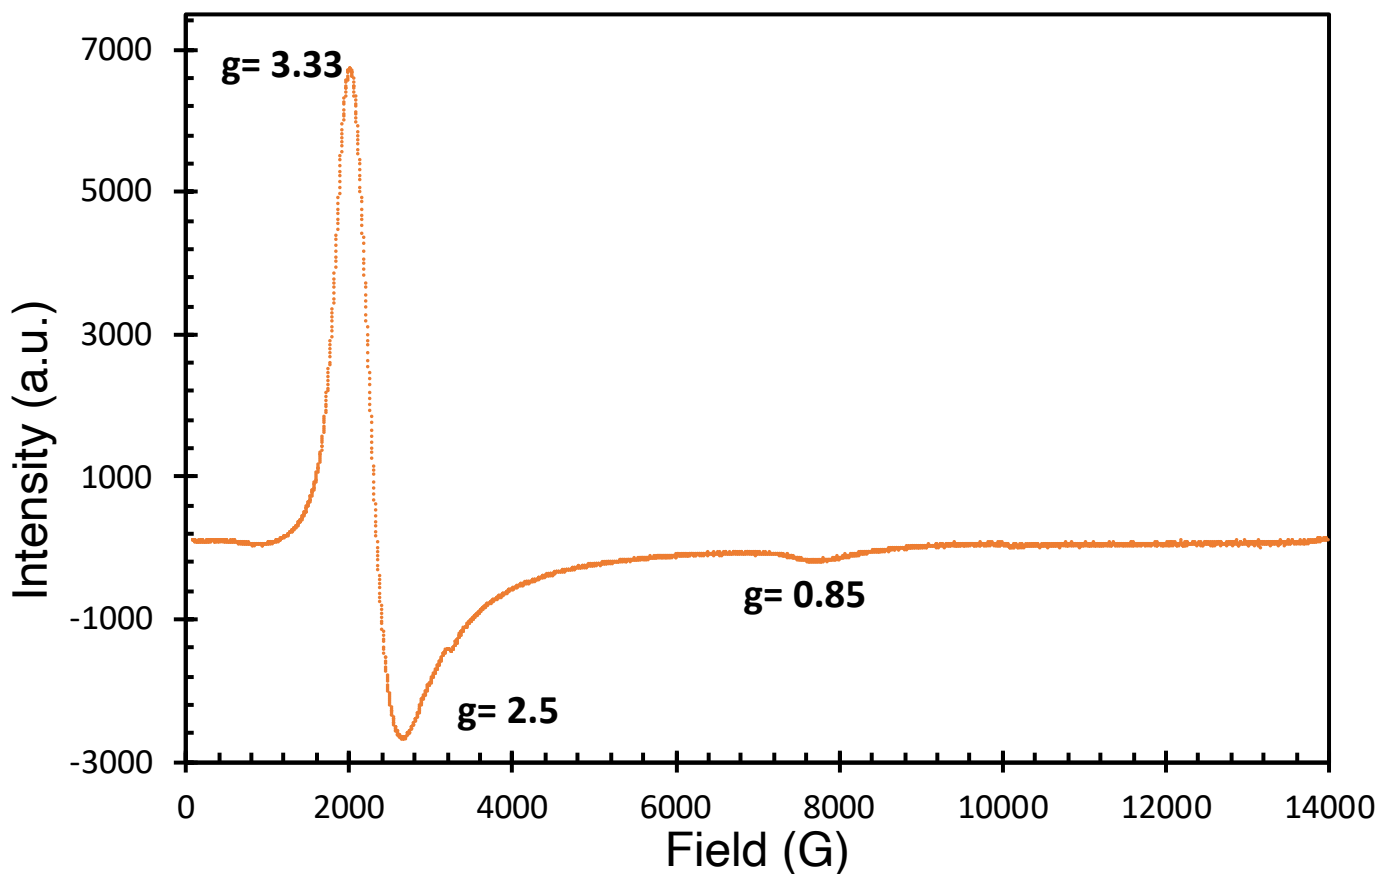

**Figure S70:** X-band EPR spectrum of a 20 mM frozen solution of  $[\text{U}(\text{ODtbp})_3]$  in a Hex:Tol (1:1) glass at 6 K. ( $\nu = 9.397400$  GHz,  $P = 0.006332$  mW, amplitude modulation 5 G, frequency modulation 100 kHz).

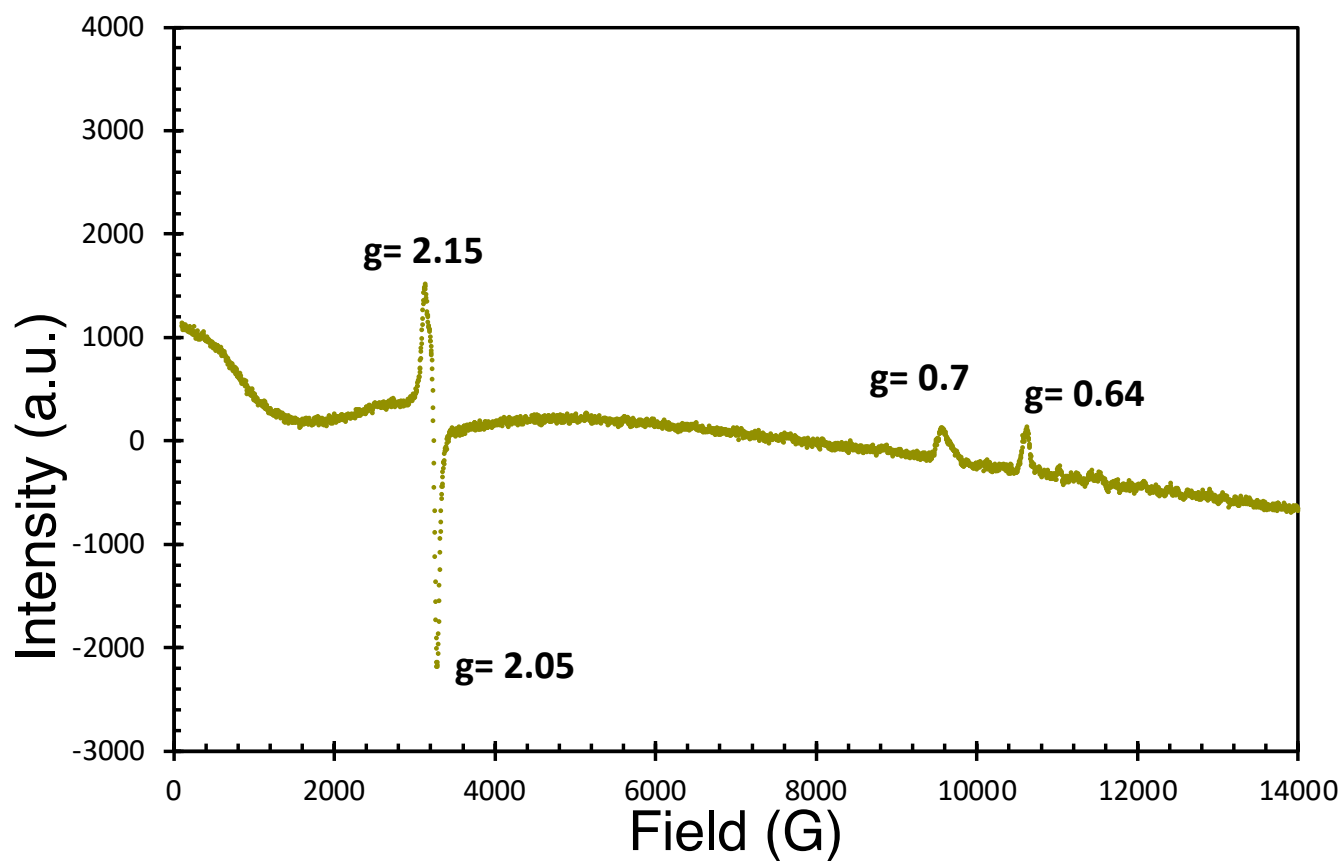

**Figure S71:** X-band EPR spectrum of pure powder of **1-Sm** in a Hex:Tol (1:1) glass at 6 K. ( $\nu = 9.4029$  GHz,  $P = 0.000633307$  mW, amplitude modulation 5 G, frequency modulation 100 kHz).

The X-band EPR spectrum of pure powder of **1\*-Sm** does not show any signal as expected for the  $f^6$  ion.

## IR data

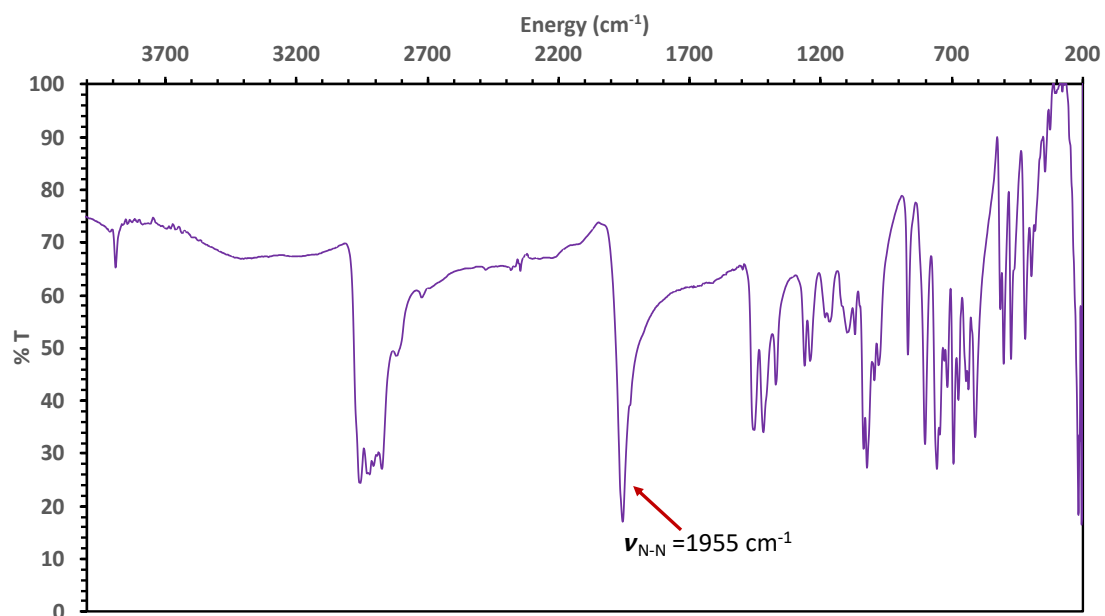

**Figure S72:** IR spectrum of isolated complex **A** in KBr pill measured at 25 °C.

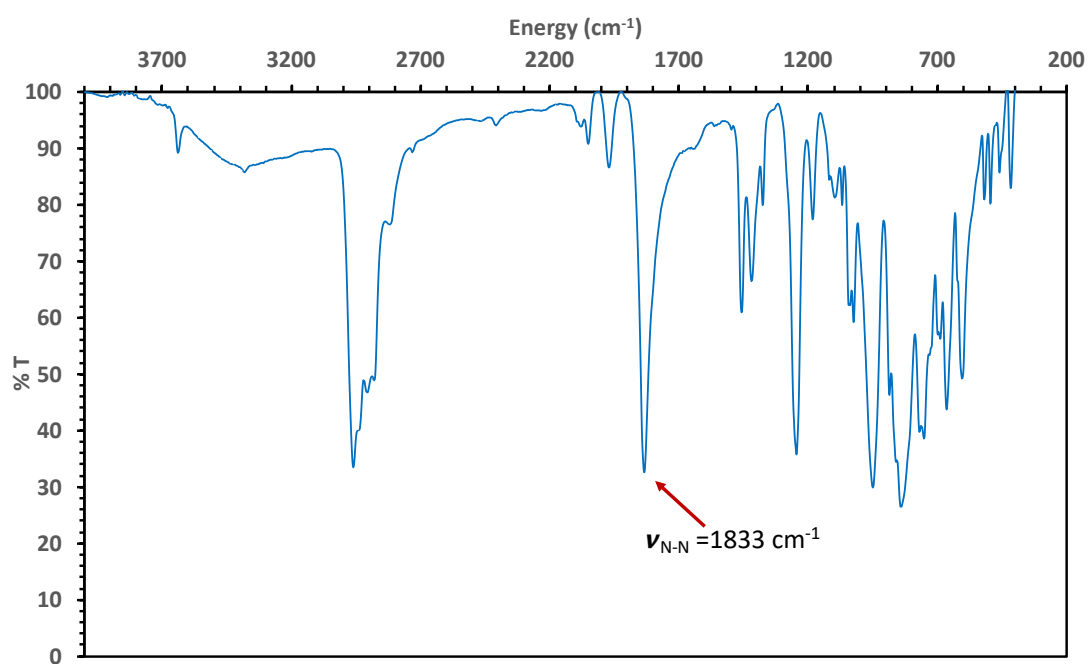

**Figure S73:** IR spectrum of isolated complex **1-U** in KBr pill measured at 25 °C.

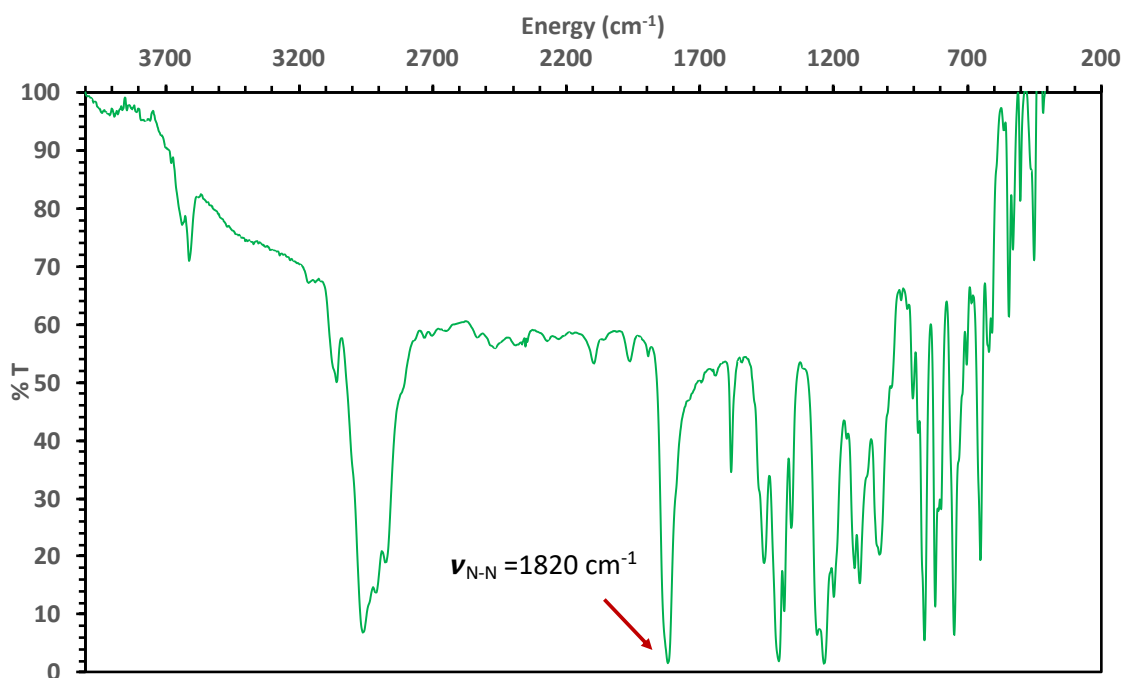

Figure S74: IR spectrum of isolated complex 2 in KBr pill measured at 25 °C.

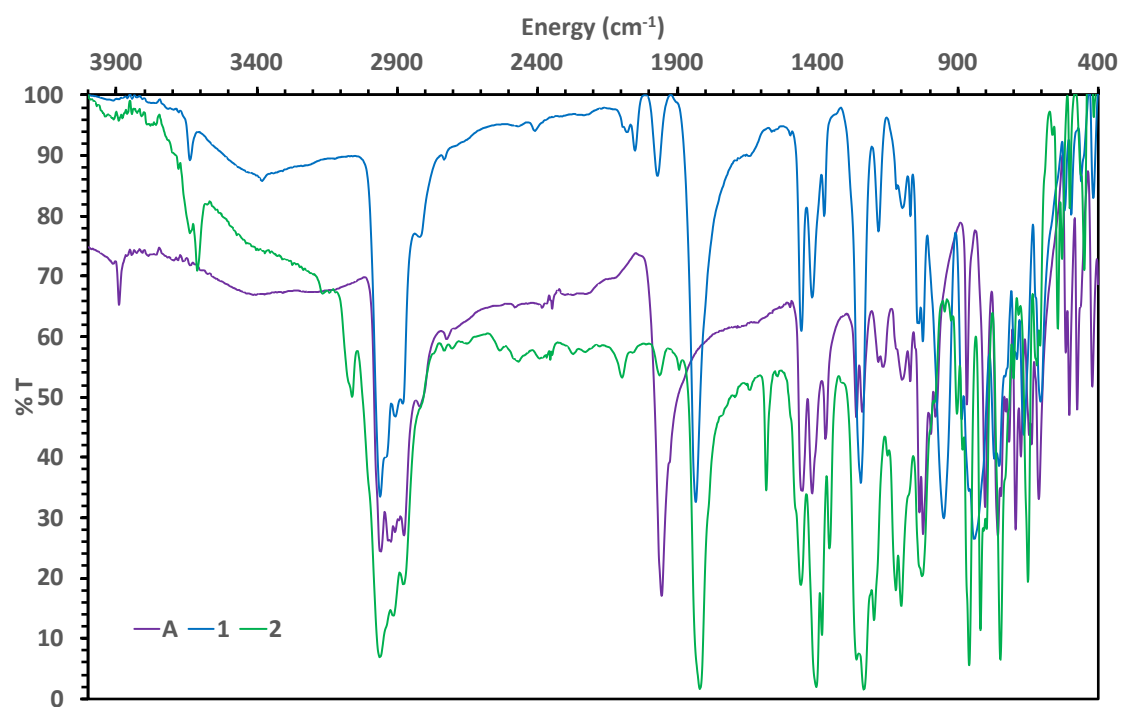

Figure S75: IR spectra comparison of isolated complexes A (purple), 1-U (blue) and 2 (green) in KBr pill measured at 25 °C.

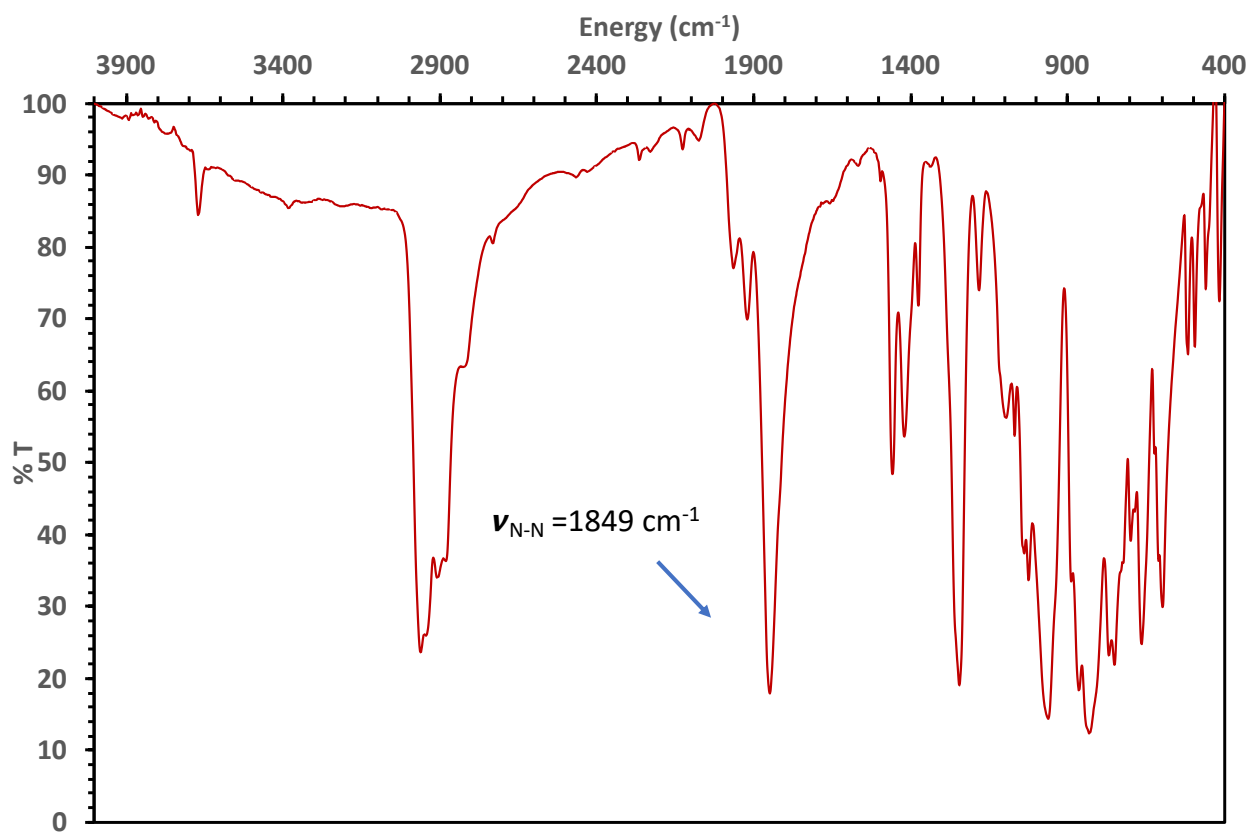

Figure S76: IR spectrum of isolated complex 1-Ce in KBr pill measured at 25 °C.

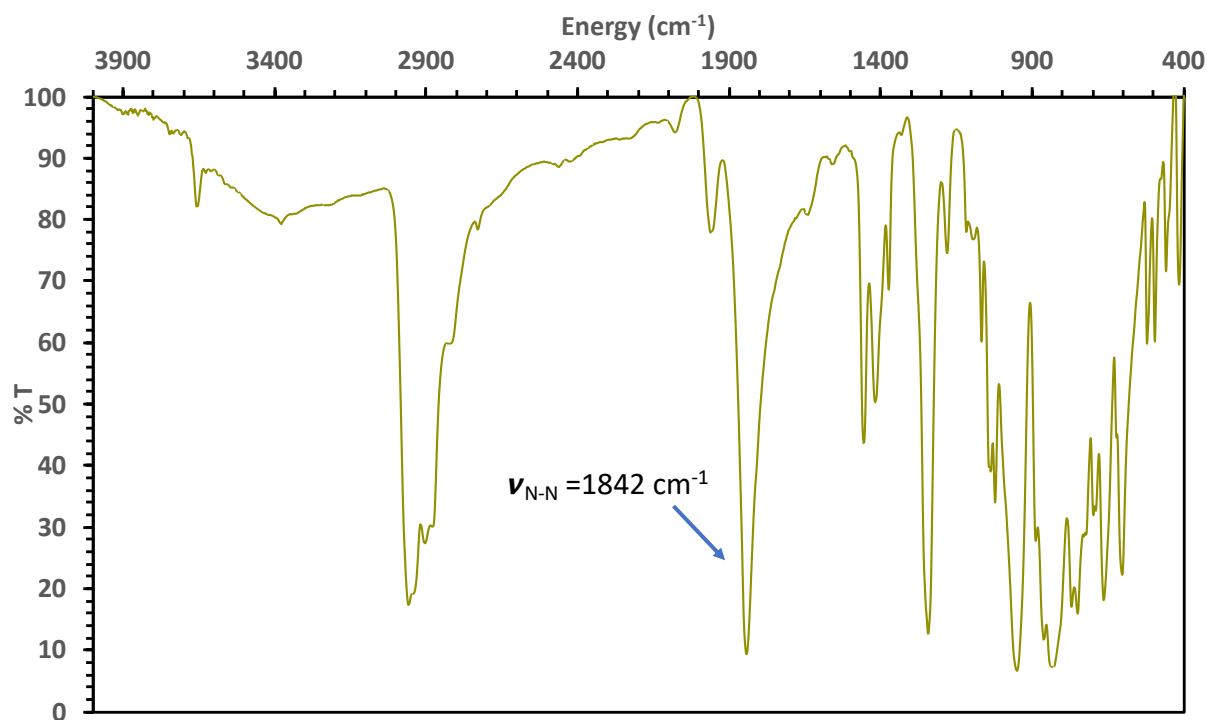

Figure S77: IR spectrum of isolated complex 1-Sm in KBr pill measured at 25 °C.

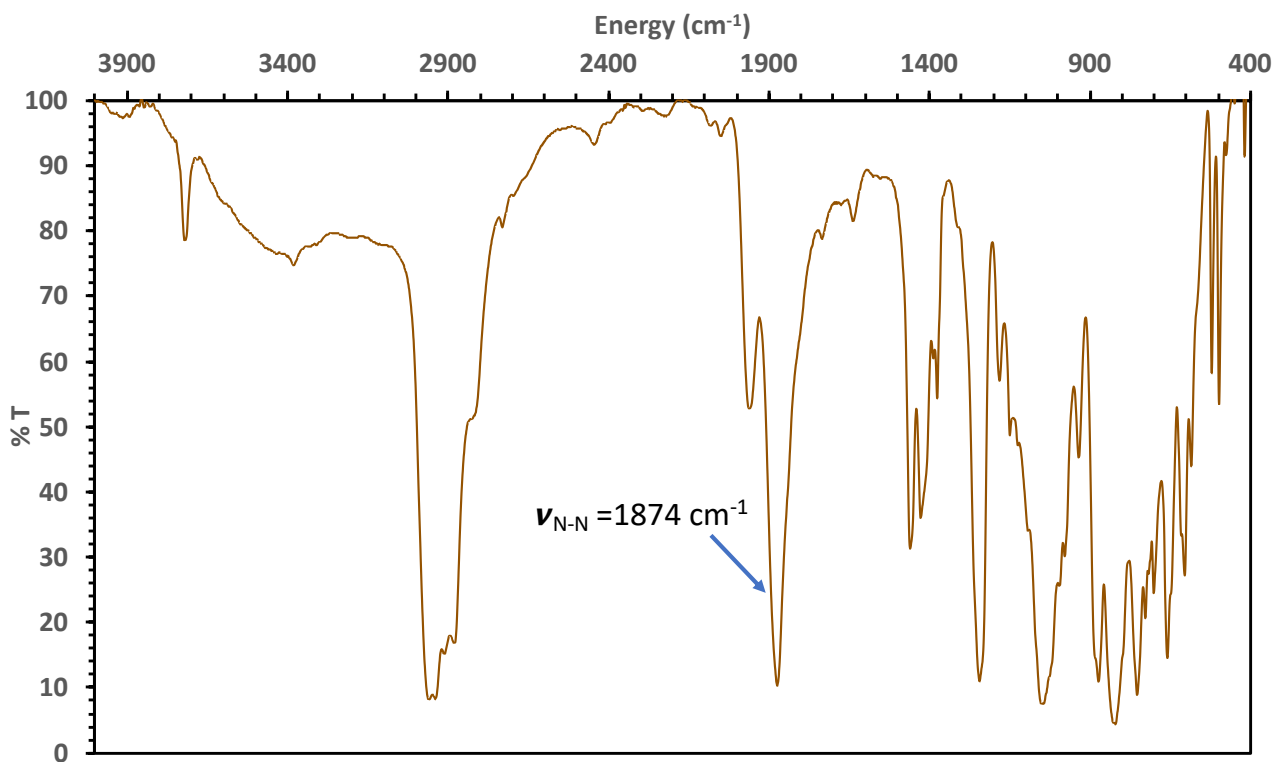

Figure S78: IR spectrum of isolated complex 1\*-Yb in KBr pill measured at 25 °C.

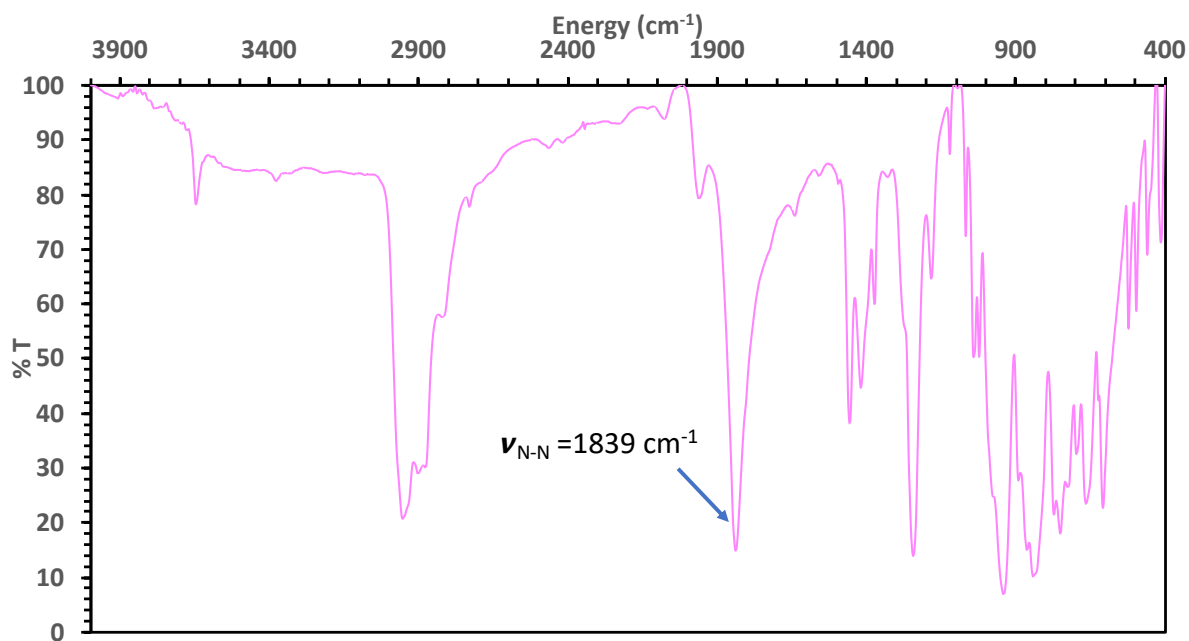

Figure S79: IR spectrum of isolated complex 1-Dy in KBr pill measured at 25 °C.

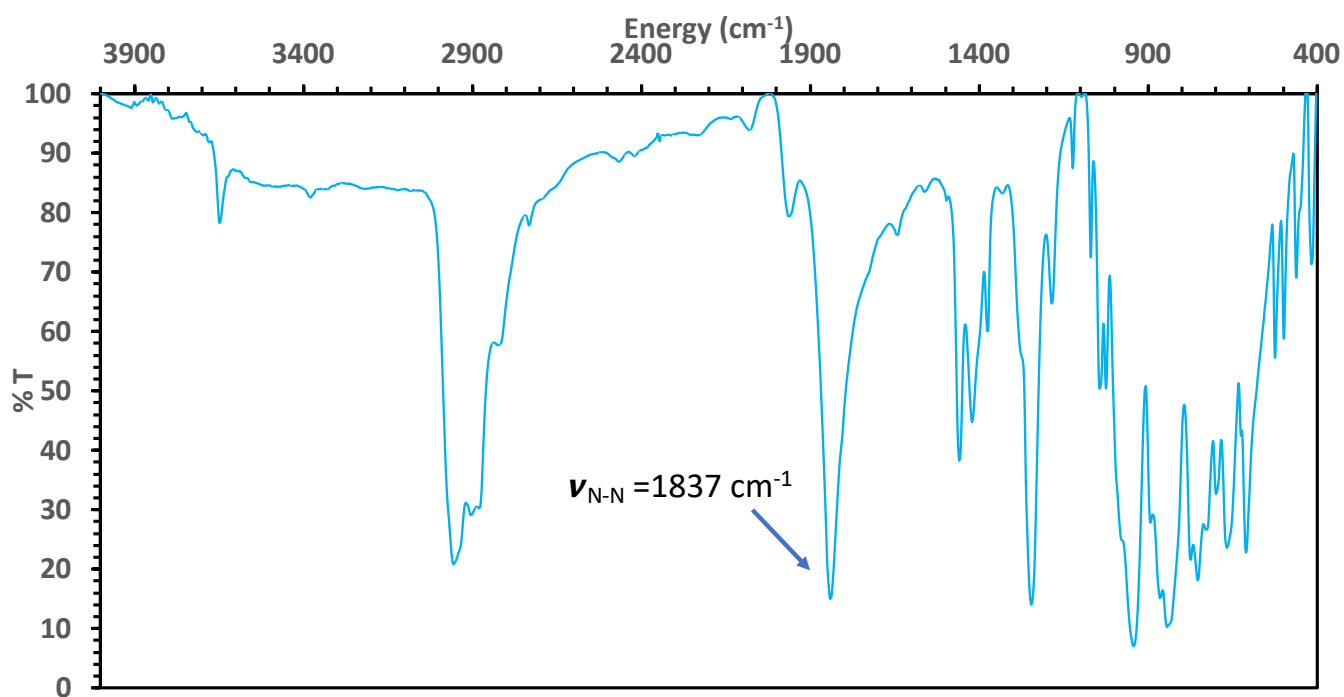

Figure S80: IR spectrum of isolated complex **1-Tm** in KBr pill measured at 25 °C.

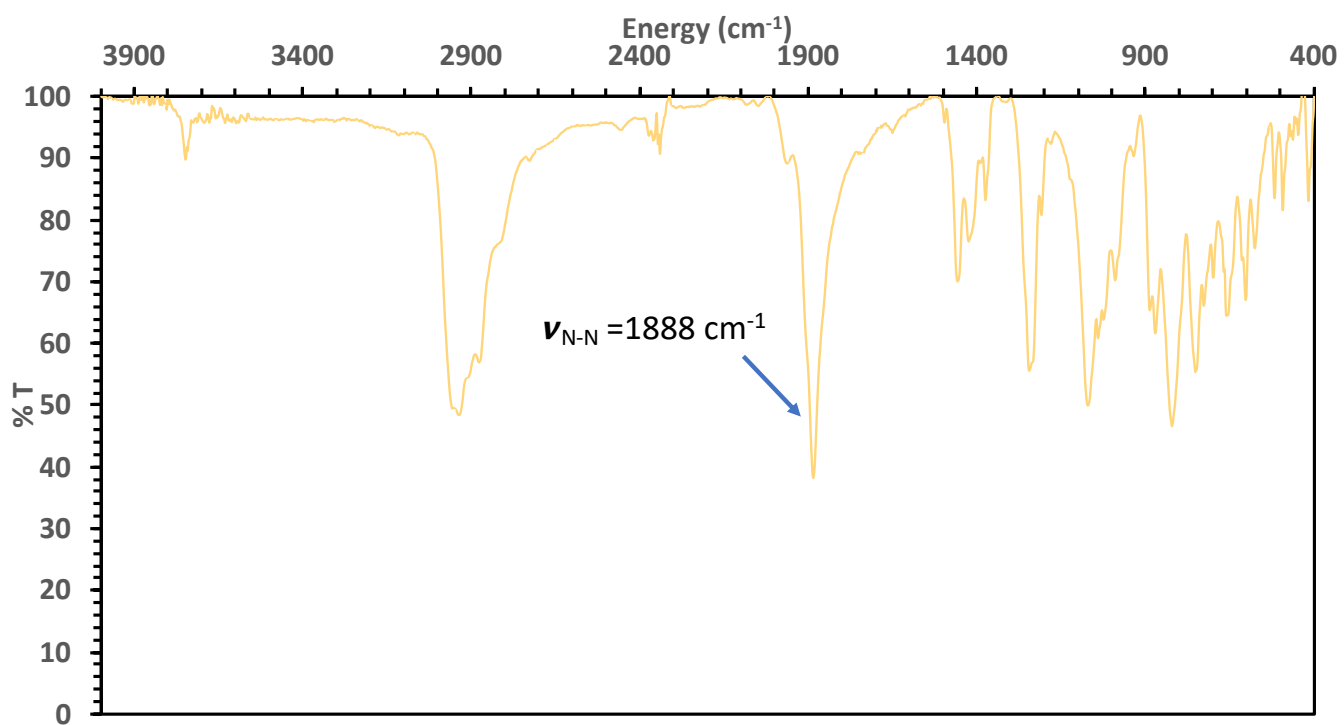

Figure S81: IR spectrum of isolated complex **1\*-Sm** in KBr pill measured at 25 °C.



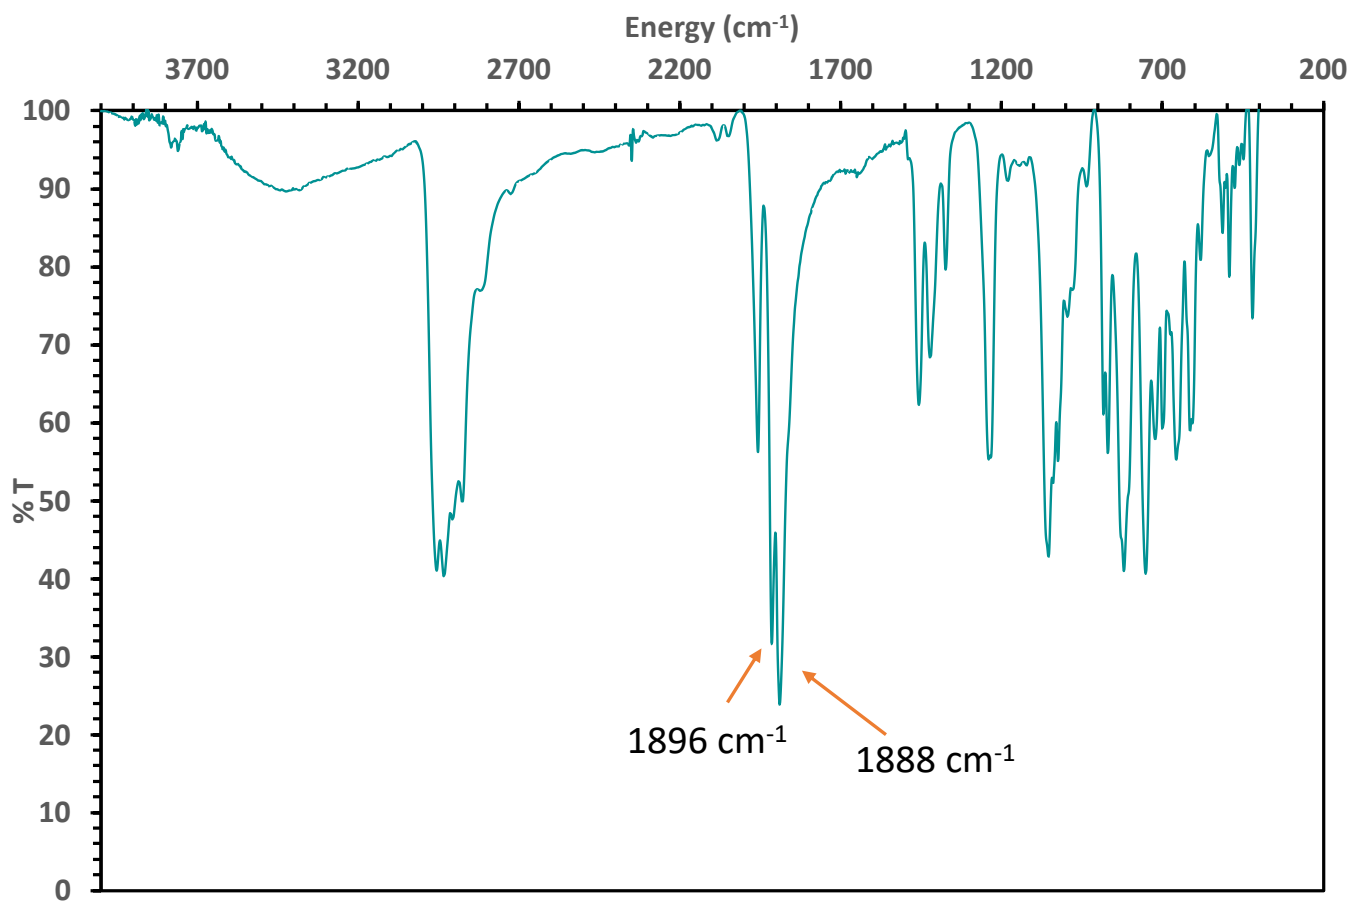

Figure S82: IR spectrum of isolated complex **3** in KBr pill measured at 25 °C.

## Computational Details

The optimization of heterometallic complexes were carried out by employing DFT hybrid functional (B3PW91)<sup>14</sup> along with small core pseudopotential Stuttgart basis set for uranium, cerium (small core or large core), samarium (small core or large core), dysprosium (small core or large core), ytterbium, iron, phosphorus and silicon atoms with additional polarization functions for phosphorus and silicon atoms.<sup>15</sup> Pople basis sets (6-31G\*\*) were employed for the rest of the atoms.<sup>16</sup> Frequency calculations were performed to locate minima for the optimized structures. Dispersion corrections were included in our calculations by employing D3 version of Grimme's dispersion with Becke-Johnson damping.<sup>17</sup> To account for the solvation effects, SMD model using toluene solvent has been included in the calculations.<sup>18</sup> All the calculations were performed using Gaussian 09 suite of programs.<sup>19</sup>

**Table ST1:** DFT computed spin energetics for **1-U**.

| Spin states | $\Delta H$ (kcal/mol) |
|-------------|-----------------------|
| S=3/2       | 0.0                   |
| S=1/2       | 15.3                  |

**Figure S83:** DFT computed spin density plot for **1-U**, (S=3/2).

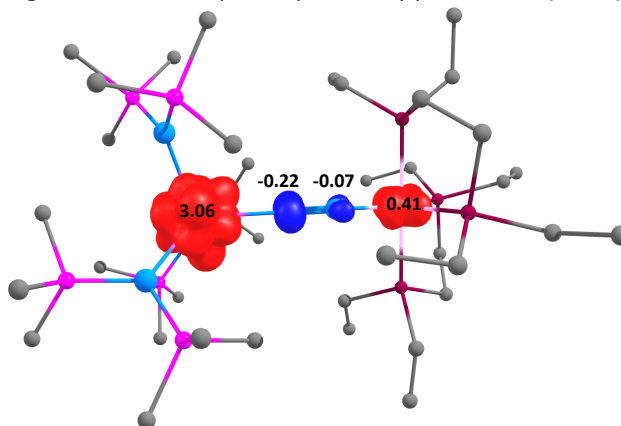

**Table ST2:** DFT computed spin energetics for **2**

| Spin states | $\Delta H$ (kcal/mol) |
|-------------|-----------------------|
| S=3/2       | 0.0                   |
| S=1/2       | 15.6                  |

**Figure S84:** DFT computed spin density plot for **2**, (S=3/2).

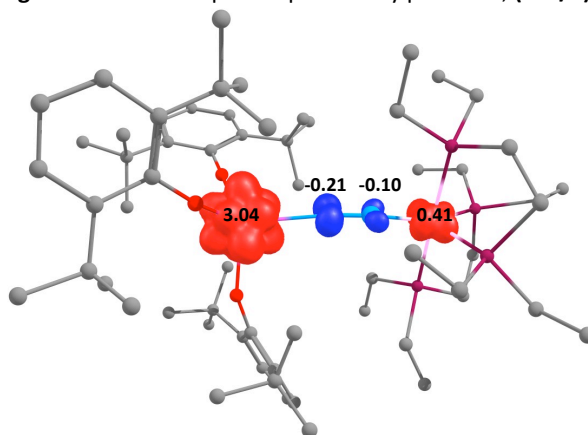

**Table ST3.** Comparison of selected structural parameters between DFT computed and x-ray structures.

|                                                            |        | X-ray      | DFT        |                         |            |                   |
|------------------------------------------------------------|--------|------------|------------|-------------------------|------------|-------------------|
|                                                            |        |            | Small core | Small core + solv+ disp | Large core | Large core + disp |
| <b>1-Ce</b><br>(S=1/2)                                     | Fe-N   | 1.71       | 1.74       | 1.71                    | 1.74       | 1.71              |
|                                                            | N-N    | 1.11       | 1.16       | 1.16                    | 1.16       | 1.16              |
|                                                            | Ce-N   | 2.54       | 2.56       | 2.54                    | 2.60       | 2.54              |
| <b>1-Sm</b><br>(S=5/2)                                     | Fe-N   | 1.76       | 1.78       | 1.73                    | 1.74       | 1.71              |
|                                                            | N-N    | 1.16       | 1.16       | 1.16                    | 1.16       | 1.16              |
|                                                            | Sm-N   | 2.48       | 2.50       | 2.44                    | 2.53       | 2.48              |
| <b>1*-Sm</b><br>(S=3)                                      | Fe-N   | 1.75       | 1.74       | 1.72                    |            |                   |
|                                                            | N-N    | 1.13       | 1.15       | 1.15                    |            |                   |
|                                                            | Sm-N   | 2.57       | 2.61       | 2.58                    |            |                   |
|                                                            | Sm-N-N | 174.0      | 176.8      | 144.0                   |            |                   |
| <b>1-Dy</b><br>(S=5/2)                                     | Fe-N   | 1.75       | 1.75       | 1.71                    | 1.73       | 1.71              |
|                                                            | N-N    | 1.17       | 1.16       | 1.16                    | 1.16       | 1.16              |
|                                                            | Dy-N   | 2.40       | 2.42       | 2.38                    | 2.43       | 2.40              |
| <b>1*-Yb</b><br>(S=0)                                      | Fe-N   | 1.76       | 1.74       | 1.72                    |            |                   |
|                                                            | N-N    | 1.15       | 1.15       | 1.16                    |            |                   |
|                                                            | Yb-N   | 2.44       | 2.51       | 2.39                    |            |                   |
| <b>3</b>                                                   | Fe-N   | 1.76, 1.76 | 1.75, 1.76 | 1.73, 1.73              |            |                   |
|                                                            | N-N    | 1.14, 1.14 | 1.15, 1.15 | 1.15, 1.15              |            |                   |
|                                                            | Sm-N   | 2.67, 2.57 | 2.73, 2.72 | 2.56, 2.55              |            |                   |
| <b>1-U</b><br>(S=3/2)                                      | Fe-N   | 1.73/1.74  | 1.74       |                         |            |                   |
|                                                            | N-N    | 1.16/1.14  | 1.16       |                         |            |                   |
|                                                            | U-N    | 2.48/2.52  | 2.53       |                         |            |                   |
| <b>2</b><br>(S=3/2)                                        | Fe-N   | 1.75       | 1.75       |                         |            |                   |
|                                                            | N-N    | 1.16       | 1.17       |                         |            |                   |
|                                                            | U-N    | 2.47       | 2.52       |                         |            |                   |
| <b>A</b> (S=0)                                             | Fe-N   | 1.75       | 1.77       |                         |            |                   |
|                                                            | N-N    | 1.14       | 1.14       |                         |            |                   |
| N <sub>2</sub> U(NSiMe <sub>2</sub> ) <sub>3</sub> (S=3/2) | U-N    |            | 2.46       |                         |            |                   |
|                                                            | N-N    |            | 1.12       |                         |            |                   |
| N <sub>2</sub> U(OAr) <sub>3</sub> (S=3/2)                 | U-N    |            | 2.50       |                         |            |                   |
|                                                            | N-N    |            | 1.12       |                         |            |                   |

**Table ST4.** Computed dissociation energies ( $\Delta H$ , kcal/mol) for  $X_n(\text{Ln/U})\text{-N}_2\text{-Fe}(\text{depe})_2 \rightarrow X_n(\text{Ln/U}) + \text{A}$  reaction (X = HMDS or OAr; n = 2 or 3).

|                          | 1-Ce | 1-Sm | 1-Dy | 1*-Yb | 1*-Sm | 1-U  | 2    |
|--------------------------|------|------|------|-------|-------|------|------|
| Small core               | -4.1 | -4.9 | -2.7 | 0.6   | 1.5   | -0.9 | -2.2 |
| Small core (solv + disp) |      |      |      | 11.5  | 8.0   | 32.1 |      |
| Large core               | 2.9  | -2.0 | -0.7 |       |       |      |      |
| Large core (disp)        | 34.0 | 30.8 | 30.7 |       |       |      |      |

**Table ST5.** Computed dissociation energies ( $\Delta H$ , kcal/mol) for the  $X_3\text{U-N}_2 \rightarrow X_3\text{U} + \text{N}_2$  reaction (X = HMDS or OAr).

|            | $\text{N}_2\text{U}(\text{HMDS})_3$ | $\text{N}_2\text{U}(\text{OAr})_3$ |
|------------|-------------------------------------|------------------------------------|
| Small core | -4.2                                | -0.5                               |

**Table ST6.** Computed dissociation energies ( $\Delta H$ , kcal/mol) for the  $3 \rightarrow 1^*\text{-Sm} + \text{A}$  reaction.

|            | BDE |
|------------|-----|
| Small core | 1.1 |

**Table ST7.** Computed Wiberg bond index (small core, **large core**) for the  $\text{FeN}_2\text{Ln/U}$  core.

| 1-Ce<br>(S=1/2) | Wiberg bond Index | Atom Label | Wiberg bond Index | Atom Label | Wiberg bond Index |
|-----------------|-------------------|------------|-------------------|------------|-------------------|
| Ce1             | 0.0000            | Fe2        | 0.0000            | N13        | 0.0000            |
| N13             | 0.2212<br>0.1708  | N14        | 0.7535<br>0.7612  | N14        | 2.3305<br>2.2893  |
| 1-Sm<br>(S=5/2) | Wiberg bond Index | Atom Label | Wiberg bond Index | Atom Label | Wiberg bond Index |
| Sm1             | 0.0000            | Fe2        | 0.0000            | N13        | 0.0000            |
| N13             | 0.2378<br>0.1840  | N14        | 0.7526<br>0.7636  | N14        | 2.3234<br>2.2884  |
| 1-Dy<br>(S=5/2) | Wiberg bond Index | Atom Label | Wiberg bond Index | Atom Label | Wiberg bond Index |
| Dy1             | 0.0000            | Fe2        | 0.0000            | N13        | 0.0000            |
| N13             | 0.2721<br>0.1920  | N14        | 0.7679<br>0.7763  | N14        | 2.2878<br>2.2656  |
| 1*-Yb<br>(S=0)  | Wiberg bond Index | Atom Label | Wiberg bond Index | Atom Label | Wiberg bond Index |
| Yb1             | 0.0000            | Fe2        | 0.0000            | N12        | 0.0000            |
| N12             | 0.2249            | N13        | 0.7427            | N13        | 2.3389            |
| 1*-Sm<br>(S=3)  | Wiberg bond Index | Atom Label | Wiberg bond Index | Atom Label | Wiberg bond Index |
| Sm1             | 0.0000            | Fe2        | 0.0000            | N11        | 0.0000            |
| N11             | 0.1999            | N12        | 0.7500            | N12        | 2.3358            |
| 3<br>(S=3)      | Wiberg bond Index | Atom Label | Wiberg bond Index | Atom Label | Wiberg bond Index |
| Sm1             | 0.0000            | Sm1        | 0.0000            | Fe2        | 0.0000            |
| N17             | 0.1702            | N18        | 0.1725            | N16        | 0.7119            |
| Atom label      | Wiberg bond Index | Atom Label | Wiberg bond Index | Atom Label | Wiberg bond Index |
| Fe3             | 0.0000            | N16        | 0.0000            | N18        | 0.0000            |
| N19             | 0.7053            | N17        | 2.3846            | N19        | 2.4002            |
| 2<br>(S=3/2)    | Wiberg bond Index | Atom Label | Wiberg bond Index | Atom Label | Wiberg bond Index |
| U1              | 0.0000            | Fe2        | 0.0000            | N10        | 0.0000            |
| N10             | 0.4358            | N11        | 0.8003            | N11        | 2.1768            |
| 1-U<br>(S=3/2)  | Wiberg bond Index | Atom Label | Wiberg bond Index | Atom Label | Wiberg bond Index |
| U1              | 0.0000            | Fe2        | 0.0000            | N13        | 0.0000            |
| N13             | 0.5013            | N14        | 0.7579            | N14        | 2.1613            |

|                                                    |                      |            |                      |  |  |
|----------------------------------------------------|----------------------|------------|----------------------|--|--|
| <b>A</b><br>(S=0)                                  | Wiberg bond<br>Index | Atom Label | Wiberg bond<br>Index |  |  |
| Fe1                                                | 0.0000               | N26        | 0.0000               |  |  |
| N26                                                | 0.6103               | N27        | 2.5212               |  |  |
| <b>N<sub>2</sub>U(HMDS)<sub>3</sub></b><br>(S=3/2) | Wiberg bond<br>Index | Atom Label | Wiberg bond<br>Index |  |  |
| U1                                                 | 0.0000               | N8         | 0.0000               |  |  |
| N8                                                 | 0.5271               | N9         | 2.7479               |  |  |
| <b>N<sub>2</sub>U(ArO)<sub>3</sub></b><br>(S=3/2)  | Wiberg bond<br>Index | Atom Label | Wiberg bond<br>Index |  |  |
| U1                                                 | 0.0000               | N5         | 0.0000               |  |  |
| N5                                                 | 0.4548               | N6         | 2.8052               |  |  |

**Table ST8.** Computed natural charges (small core, large core) for the FeN<sub>2</sub>Ln/U core.

|      | <b>1-Ce</b>                 | <b>1-Sm</b>                         | <b>1-Dy</b>                        | <b>1*-Yb</b> | <b>1*-Sm</b> | <b>3</b>           | <b>1-U</b> | <b>2</b> |
|------|-----------------------------|-------------------------------------|------------------------------------|--------------|--------------|--------------------|------------|----------|
| Ln/U | 1.91455<br><b>2.08633</b>   | 1.94680<br><b>2.03213</b>           | 1.90292<br><b>2.02034</b>          | 1.42366      | 1.51747      | 1.47972            | 1.61568    | 1.62517  |
| N    | -0.31663<br><b>-0.38043</b> | -0.32146<br><b>-0.37222</b>         | -0.33280<br><b>-0.39289</b>        | -0.31254     | -0.33194     | -0.28935, -0.28068 | -0.34898   | -0.37707 |
| N    | -0.03694<br><b>-0.02820</b> | -0.04616<br><b>-0.02973</b>         | -0.05808<br><b>-0.03071</b>        | -0.03491     | -0.03989     | -0.04476, -0.03929 | -0.05617   | -0.02627 |
| Fe   | -0.51181<br><b>-0.48368</b> | -0.48679<br><b>-0.49494</b>         | -0.47864<br><b>-0.48415</b>        | -0.53811     | -0.54023     | -0.55031, -0.56539 | -0.57201   | -0.57414 |
|      | <b>A</b>                    | N <sub>2</sub> U(HMDS) <sub>3</sub> | N <sub>2</sub> U(OAr) <sub>3</sub> |              |              |                    |            |          |
| Ln/U |                             | 1.62265                             | 1.60634                            |              |              |                    |            |          |
| N    | -0.16685                    | -0.11017                            | -0.09860                           |              |              |                    |            |          |
| N    | -0.08336                    | 0.06588                             | 0.09204                            |              |              |                    |            |          |
| Fe   | -0.60233                    |                                     |                                    |              |              |                    |            |          |

**Table ST9.** NBO Analysis of Canonical Molecular Orbitals for metal-to-N<sub>2</sub> back bonding (small core).

|                           |                                                                                                                                                                                        |
|---------------------------|----------------------------------------------------------------------------------------------------------------------------------------------------------------------------------------|
| <b>A</b>                  | MO 108 (occ): orbital energy = -0.13237 a.u.<br>0.730*[ 30]: LP ( 4)Fe 1(lp)<br>-0.353*[183]: BD*( 2) N26- N27*<br>-0.267*[ 31]: LP ( 1) P 2(lp)<br>0.261*[ 33]: LP ( 1) P 4(lp)       |
| <b>1-Ce</b><br>(BMO-HOMO) | MO 227 (occ): orbital energy = -0.15373 a.u.<br>-0.532*[226]: BD*( 1)Fe 2- P 6*<br>-0.448*[280]: BD*( 2) N13- N14*<br>0.432*[241]: BD*( 1)Fe 2- P 4*<br>-0.341*[ 62]: LP ( 2)Fe 2(lp)  |
| <b>1-Sm</b><br>(BMO-HOMO) | MO 227 (occ): orbital energy = -0.14724 a.u.<br>0.672*[225]: BD*( 1)Fe 2- P 4*<br>-0.470*[281]: BD*( 3) N13- N14*<br>-0.295*[226]: BD*( 1)Fe 2- P 6*<br>-0.225*[ 69]: BD ( 1)Fe 2- P 4 |
| <b>1-Dy</b><br>(BMO-HOMO) | MO 229 (occ): orbital energy = -0.14657 a.u.<br>0.687*[228]: BD*( 1)Fe 2- N13*<br>-0.456*[242]: BD*( 1)Fe 2- P 5*<br>0.225*[243]: BD*( 1)Fe 2- N14*<br>0.225*[ 77]: BD ( 2)Fe 2- N14   |
| <b>1*-Yb</b><br>(HOMO-7)  | MO 213 (occ): orbital energy = -0.15207 a.u.<br>0.594*[227]: BD*( 1)Fe 2- P 5*<br>-0.470*[261]: BD*( 3) N12- N13*<br>-0.468*[220]: BD*( 1)Fe 2- P 4*                                   |
| <b>1*-Sm</b>              | MO 192 (occ): orbital energy = -0.15330 a.u.                                                                                                                                           |

|                                     |                                                                                                                                                                                                                                                                                                                                                                                                                                                                                                   |
|-------------------------------------|---------------------------------------------------------------------------------------------------------------------------------------------------------------------------------------------------------------------------------------------------------------------------------------------------------------------------------------------------------------------------------------------------------------------------------------------------------------------------------------------------|
| (BMO-HOMO)                          | 0.539*[206]: BD*( 1)Fe 2- P 5*<br>-0.538*[191]: BD*( 1)Fe 2- P 4*<br>0.497*[238]: BD*( 3) N11- N12*<br>-0.225*[ 96]: BD ( 3) N11- N12                                                                                                                                                                                                                                                                                                                                                             |
| <b>3</b><br>(AMO-HOMO-6, HOMO-7)    | MO 301 (occ): orbital energy = -0.14009 a.u.<br>0.505*[300]: BD*( 1)Fe 3- P11*<br>-0.392*[299]: BD*( 1)Fe 2- P 5*<br>0.331*[363]: BD*( 2) N18- N19*<br>0.271*[361]: BD*( 3) N16- N17*<br>0.252*[316]: LV ( 1)Fe 3(lv)<br>MO 300 (occ): orbital energy = -0.14245 a.u.<br>0.466*[299]: BD*( 1)Fe 2- P 5*<br>0.398*[300]: BD*( 1)Fe 3- P11*<br>-0.343*[361]: BD*( 3) N16- N17*<br>0.273*[363]: BD*( 2) N18- N19*<br>0.246*[315]: LV ( 1)Fe 2(lv)<br>-0.231*[ 87]: LP ( 1) P 6(lp)                   |
| <b>1-U</b><br>(AMO-HOMO-3)          | MO 227 (occ): orbital energy = -0.16841 a.u.<br>0.553*[229]: BD*( 1)Fe 2- P 4*<br>-0.413*[242]: BD*( 1)Fe 2- P 5*<br>-0.406*[281]: BD*( 3) N13- N14*<br>-0.266*[ 65]: LP ( 2)Fe 2(lp)<br>-0.226*[ 62]: LP ( 2) U 1(lp)                                                                                                                                                                                                                                                                            |
| <b>2</b><br>(AMO-HOMO-4)            | MO 293 (occ): orbital energy = -0.16013 a.u.<br>-0.622*[289]: BD*( 1)Fe 2- P 4*<br>0.432*[332]: BD*( 3) N10- N11*<br>0.261*[290]: BD*( 1)Fe 2- P 5*<br>-0.231*[311]: BD*( 1)Fe 2- N11*                                                                                                                                                                                                                                                                                                            |
| N <sub>2</sub> U(HMDS) <sub>3</sub> | MO 129 (vir): orbital energy = -0.06472 a.u. (HOMO)<br>0.713*[165]: BD*( 3) N 8- N 9*<br>0.338*[164]: BD*( 2) N 8- N 9*<br>0.268*[136]: BD*( 1) U 1- N11*<br>-0.234*[130]: LV ( 2) U 1(lv)<br>-0.229*[135]: BD*( 2) U 1- N10*<br>MO 128 (occ): orbital energy = -0.15804 a.u. (HOMO-1)<br>-0.584*[128]: BD*( 2) U 1- N12*<br>-0.404*[129]: LV ( 1) U 1(lv)<br>-0.330*[164]: BD*( 2) N 8- N 9*<br>0.327*[133]: BD*( 1) U 1- N 8*<br>-0.319*[ 37]: LP ( 1) U 1(lp)<br>-0.249*[ 38]: LP ( 2) U 1(lp) |
| N <sub>2</sub> U(OAr) <sub>3</sub>  | MO 194 (occ): orbital energy = -0.16708 a.u. (HOMO)<br>0.592*[195]: LV ( 1) U 1(lv)<br>0.358*[201]: BD*( 2) U 1- O 2*<br>0.329*[203]: BD*( 2) U 1- O 3*<br>0.298*[ 61]: LP ( 1) U 1(lp)<br>0.246*[211]: BD*( 3) N 5- N 6*<br>0.229*[205]: BD*( 2) U 1- O 4*<br>MO 193 (occ): orbital energy = -0.17331 a.u. (HOMO-1)<br>-0.902*[ 62]: LP ( 2) U 1(lp)<br>0.258*[210]: BD*( 2) N 5- N 6*                                                                                                           |

**Table ST10.** Computed MOs for  $[(\text{depe})_2\text{FeN}_2\text{Ln}(\text{HMDS})_n]$  ( $n = 2$  or  $3$ ) complexes (small core).

|            | 1-Ce ( $S=1/2$ )                                                                    |             | 1-Sm ( $S=5/2$ )                                                                     |             | 1*-Sm ( $S=3$ )                                                                       |              | 1-Dy ( $S=5/2$ )                                                                      |
|------------|-------------------------------------------------------------------------------------|-------------|--------------------------------------------------------------------------------------|-------------|---------------------------------------------------------------------------------------|--------------|---------------------------------------------------------------------------------------|
|            |                                                                                     |             |                                                                                      | AMO-HOMO-11 | 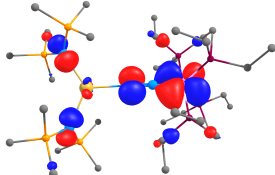   | AMO-HOMO-108 |    |
|            |                                                                                     | AMO-HOMO-38 |    | AMO-HOMO-10 |    | AMO-HOMO-107 |    |
|            |                                                                                     | AMO-HOMO-35 |    | AMO-HOMO-7  |    | AMO-HOMO-105 |    |
|            |                                                                                     | AMO-HOMO-30 |    | AMO-HOMO-6  |    | AMO-HOMO-104 |    |
|            |                                                                                     | AMO-HOMO-20 |   | AMO-HOMO-5  |   | AMO-HOMO-101 |   |
| AMO-HOMO-2 |  | AMO-HOMO-19 |  | AMO-HOMO-4  |  | AMO-HOMO-93  |  |

|            |                                                                                     |            |                                                                                      |            |                                                                                       |             |                                                                                       |
|------------|-------------------------------------------------------------------------------------|------------|--------------------------------------------------------------------------------------|------------|---------------------------------------------------------------------------------------|-------------|---------------------------------------------------------------------------------------|
| AMO-HOMO-1 | 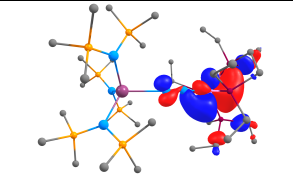   | AMO-HOMO-6 |    | AMO-HOMO-3 |    | AMO-HOMO-68 |    |
| AMO-HOMO   |    | AMO-HOMO-5 |    | AMO-HOMO-2 |    | AMO-HOMO-6  |    |
| AMO-LUMO   |    | AMO-HOMO-1 |    | AMO-HOMO-1 |    | AMO-HOMO-3  |    |
| BMO-HOMO-1 |    | AMO-HOMO   |    | AMO-HOMO   |    | AMO-HOMO-1  |    |
| BMO-HOMO   |   | AMO-LUMO   |   | AMO-LUMO   |   | AMO-HOMO    |   |
| BMO-LUMO   |  | BMO-HOMO-5 |  | BMO-HOMO-5 |  | AMO-LUMO    |  |



|  |  |            |                                                                                    |            |                                                                                     |             |                                                                                       |
|--|--|------------|------------------------------------------------------------------------------------|------------|-------------------------------------------------------------------------------------|-------------|---------------------------------------------------------------------------------------|
|  |  | BMO-HOMO-1 | 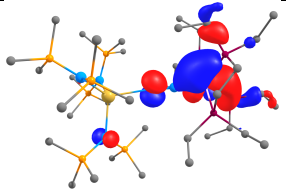 | BMO-HOMO-4 |  | BMO-HOMO-20 |    |
|  |  | BMO-HOMO   |  | BMO-HOMO-1 |  | BMO-HOMO-10 |    |
|  |  | BMO-LUMO   |  | BMO-HOMO   |  | BMO-HOMO-4  |    |
|  |  |            |                                                                                    | BMO-LUMO   |  | BMO-HOMO-2  |    |
|  |  |            |                                                                                    |            |                                                                                     | BMO-HOMO-1  |   |
|  |  |            |                                                                                    |            |                                                                                     | BMO-HOMO    |  |

|  |  |  |  |  |  |          |                                                                                     |
|--|--|--|--|--|--|----------|-------------------------------------------------------------------------------------|
|  |  |  |  |  |  | BMO-LUMO | 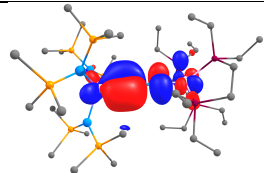 |
|--|--|--|--|--|--|----------|-------------------------------------------------------------------------------------|

**Table ST11.** Computed MOs for  $[\{(depe)_2FeN_2\}_nLn(X)_m]$  ( $n = 1$  or  $2$ ,  $m = 2$  or  $3$ ,  $X = HMDS$  or  $OAr$ ) complexes (small core).

|         | <b>1*-Yb (S=0)</b>                                                                  |             | <b>3 (S=3)</b>                                                                      |  | <b>A</b> |  | <b>1-U (S=3/2)</b> |  | <b>2 (S=3/2)</b> |
|---------|-------------------------------------------------------------------------------------|-------------|-------------------------------------------------------------------------------------|--|----------|--|--------------------|--|------------------|
|         |                                                                                     | AMO-HOMO-15 | 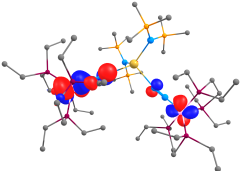   |  |          |  |                    |  |                  |
|         |                                                                                     | AMO-HOMO-14 |    |  |          |  |                    |  |                  |
|         |                                                                                     | AMO-HOMO-13 |    |  |          |  |                    |  |                  |
| HOMO-13 |   | AMO-HOMO-12 |   |  |          |  |                    |  |                  |
| HOMO-12 |  | AMO-HOMO-9  |  |  |          |  |                    |  |                  |

|        |                                                                                     |            |                                                                                     |        |                                                                                                                |            |                                                                                       |             |                                                                                       |
|--------|-------------------------------------------------------------------------------------|------------|-------------------------------------------------------------------------------------|--------|----------------------------------------------------------------------------------------------------------------|------------|---------------------------------------------------------------------------------------|-------------|---------------------------------------------------------------------------------------|
| HOMO-8 | 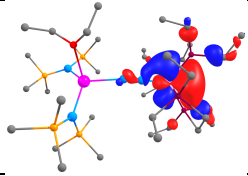   | AMO-HOMO-8 |    |        |                                                                                                                |            |                                                                                       |             |                                                                                       |
| HOMO-7 |    | AMO-HOMO-7 |    |        |                                                                                                                |            |                                                                                       |             |                                                                                       |
| HOMO-6 |    | AMO-HOMO-6 |    |        |                                                                                                                | AMO-HOMO-9 |    | AMO-HOMO-11 |    |
| HOMO-5 |    | AMO-HOMO-5 |    |        |                                                                                                                | AMO-HOMO-7 |    | AMO-HOMO-8  |    |
| HOMO-4 |   | AMO-HOMO-4 |   |        |                                                                                                                | AMO-HOMO-4 |   | AMO-HOMO-4  |   |
| HOMO-3 |  | AMO-HOMO-3 |  | HOMO-3 | <br>$\epsilon = -0.17848$ | AMO-HOMO-3 |  | AMO-HOMO-3  |  |
| HOMO-2 |  | AMO-HOMO-2 |  | HOMO-2 |                           | AMO-HOMO-2 |  | AMO-HOMO-2  |  |

|        |                                                                                   |            |                                                                                     |        |                                                                                                              |            |                                                                                       |            |                                                                                       |
|--------|-----------------------------------------------------------------------------------|------------|-------------------------------------------------------------------------------------|--------|--------------------------------------------------------------------------------------------------------------|------------|---------------------------------------------------------------------------------------|------------|---------------------------------------------------------------------------------------|
|        |                                                                                   |            |                                                                                     |        | $\epsilon = -0.17605$                                                                                        |            |                                                                                       |            |                                                                                       |
| HOMO-1 | 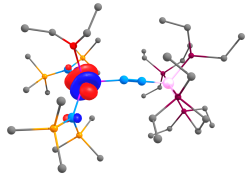 | AMO-HOMO-1 |    | HOMO-1 | <br>$\epsilon = -0.13234$ | AMO-HOMO-1 |    | AMO-HOMO-1 |    |
| HOMO   |  | AMO-HOMO   |    | HOMO   | <br>$\epsilon = -0.13003$ | AMO-HOMO   |    | AMO-HOMO   |    |
| LUMO   |  | AMO-LUMO   |    | LUMO   | <br>$\epsilon = 0.00062$  | AMO-LUMO   |    | AMO-LUMO   |    |
|        |                                                                                   | BMO-HOMO-9 |    |        |                                                                                                              | BMO-HOMO-3 |    | BMO-HOMO-6 |    |
|        |                                                                                   | BMO-HOMO-8 |  |        |                                                                                                              | BMO-HOMO-2 |  | BMO-HOMO-5 |  |
|        |                                                                                   | BMO-HOMO-7 |  |        |                                                                                                              | BMO-HOMO-1 |  | BMO-HOMO-1 |  |

|  |  |            |                                                                                     |  |  |          |                                                                                     |          |                                                                                     |
|--|--|------------|-------------------------------------------------------------------------------------|--|--|----------|-------------------------------------------------------------------------------------|----------|-------------------------------------------------------------------------------------|
|  |  | BMO-HOMO-6 | 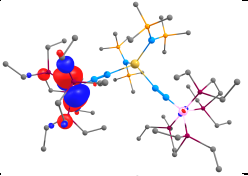   |  |  | BMO-HOMO |  | BMO-HOMO |  |
|  |  | BMO-HOMO-3 |    |  |  | BMO-LUMO |  | BMO-LUMO |  |
|  |  | BMO-HOMO-2 |    |  |  |          |                                                                                     |          |                                                                                     |
|  |  | BMO-HOMO-1 |    |  |  |          |                                                                                     |          |                                                                                     |
|  |  | BMO-HOMO   |   |  |  |          |                                                                                     |          |                                                                                     |
|  |  | BMO-LUMO   |  |  |  |          |                                                                                     |          |                                                                                     |

**Table ST12.** Computed MOs for  $N_2U(HMDS)_3$  and  $N_2U(OAr)_3$  complexes.

|            | $N_2U(HMDS)_3$ | $N_2U(OAr)_3$ |
|------------|----------------|---------------|
| AMO-HOMO-2 |                |               |
| AMO-HOMO-1 |                |               |
| AMO-HOMO   |                |               |
| AMO-LUMO   |                |               |

Table ST13. Computed MOs for 1-Ln (large core).

|                   | 1-Ce                                                                                                         | 1-Sm                                                                                                         | 1-Dy                                                                                                          |
|-------------------|--------------------------------------------------------------------------------------------------------------|--------------------------------------------------------------------------------------------------------------|---------------------------------------------------------------------------------------------------------------|
| HOMO-6            | 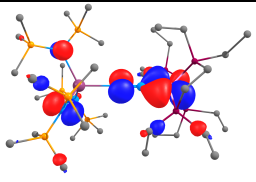<br>$\epsilon = -0.20914$   | <br>$\epsilon = -0.21048$   | <br>$\epsilon = -0.21036$   |
| HOMO-4/<br>HOMO-3 | <br>$\epsilon = -0.20195$   | <br>$\epsilon = -0.20086$   | <br>$\epsilon = -0.20111$   |
| HOMO-1            | <br>$\epsilon = -0.16446$   | <br>$\epsilon = -0.16847$   | <br>$\epsilon = -0.16829$   |
| HOMO              | <br>$\epsilon = -0.15736$   | <br>$\epsilon = -0.15473$   | <br>$\epsilon = -0.15469$   |
| LUMO              | <br>$\epsilon = -0.02216$ | <br>$\epsilon = -0.02164$ | <br>$\epsilon = -0.02112$ |

## Optimized Coordinates

### 1-Ce, S=1/2, small core

|    |              |              |              |
|----|--------------|--------------|--------------|
| Ce | 9.394056000  | 8.103014000  | 15.865607000 |
| Fe | 8.780971000  | 6.432011000  | 10.501874000 |
| P  | 6.513527000  | 6.254165000  | 10.659750000 |
| P  | 8.645061000  | 4.316967000  | 9.712759000  |
| P  | 11.043002000 | 6.543254000  | 10.276478000 |
| P  | 8.762371000  | 8.019451000  | 8.915549000  |
| Si | 6.987053000  | 10.580060000 | 15.524890000 |
| Si | 8.875611000  | 11.179317000 | 17.829207000 |
| Si | 7.319718000  | 6.447757000  | 18.464895000 |
| Si | 8.952377000  | 4.733311000  | 16.600076000 |
| Si | 12.824320000 | 7.606441000  | 17.218965000 |
| Si | 12.381977000 | 9.634579000  | 15.020455000 |
| N  | 9.036877000  | 7.297299000  | 13.255079000 |
| N  | 8.926079000  | 6.925102000  | 12.166181000 |
| N  | 8.363445000  | 10.124135000 | 16.511431000 |
| N  | 8.430901000  | 6.337152000  | 17.093602000 |
| N  | 11.726815000 | 8.404786000  | 16.090418000 |
| C  | 6.400951000  | 9.017688000  | 14.596684000 |
| H  | 7.085353000  | 8.717853000  | 13.794988000 |
| H  | 5.437449000  | 9.235011000  | 14.123977000 |
| H  | 6.244607000  | 8.165059000  | 15.267860000 |
| C  | 7.384641000  | 11.875580000 | 14.186507000 |
| H  | 8.181490000  | 11.539113000 | 13.516368000 |
| H  | 7.703526000  | 12.823174000 | 14.631456000 |

|   |              |              |              |
|---|--------------|--------------|--------------|
| H | 6.494984000  | 12.076768000 | 13.577563000 |
| C | 5.469083000  | 11.259298000 | 16.448004000 |
| H | 5.656627000  | 12.257849000 | 16.855072000 |
| H | 5.152773000  | 10.609352000 | 17.267924000 |
| H | 4.634261000  | 11.347220000 | 15.742254000 |
| C | 9.326174000  | 12.929905000 | 17.226280000 |
| H | 8.435357000  | 13.476708000 | 16.897837000 |
| H | 10.030167000 | 12.907441000 | 16.388809000 |
| H | 9.783094000  | 13.508493000 | 18.037443000 |
| C | 7.585420000  | 11.413318000 | 19.211512000 |
| H | 7.266220000  | 10.453444000 | 19.629056000 |
| H | 6.692252000  | 11.953042000 | 18.887362000 |
| H | 8.044856000  | 11.990067000 | 20.023585000 |
| C | 10.379575000 | 10.437533000 | 18.715444000 |
| H | 11.182175000 | 10.157951000 | 18.029328000 |
| H | 10.091529000 | 9.545158000  | 19.282168000 |
| H | 10.775002000 | 11.163373000 | 19.435207000 |
| C | 6.087270000  | 7.871668000  | 18.249505000 |
| H | 5.361072000  | 7.645267000  | 17.461157000 |
| H | 6.593454000  | 8.805117000  | 17.991722000 |
| H | 5.528744000  | 8.026930000  | 19.179889000 |
| C | 6.215157000  | 4.914107000  | 18.732369000 |
| H | 6.767588000  | 3.990122000  | 18.925239000 |
| H | 5.552499000  | 4.744091000  | 17.877841000 |
| H | 5.580296000  | 5.103176000  | 19.606476000 |
| C | 8.253054000  | 6.729706000  | 20.097115000 |
| H | 8.822150000  | 7.664642000  | 20.078009000 |
| H | 8.959864000  | 5.918313000  | 20.297551000 |
| H | 7.552122000  | 6.783514000  | 20.938223000 |
| C | 9.698137000  | 3.665542000  | 17.989437000 |
| H | 8.999851000  | 3.508240000  | 18.816739000 |
| H | 10.604755000 | 4.119105000  | 18.400272000 |
| H | 9.966951000  | 2.679152000  | 17.592873000 |
| C | 10.311683000 | 4.911642000  | 15.277038000 |
| H | 11.112535000 | 5.607346000  | 15.551114000 |
| H | 9.901248000  | 5.226212000  | 14.313105000 |
| H | 10.784371000 | 3.933795000  | 15.130578000 |
| C | 7.590582000  | 3.695176000  | 15.765573000 |
| H | 7.078525000  | 4.283644000  | 14.997321000 |
| H | 6.839287000  | 3.340741000  | 16.475743000 |
| H | 8.033613000  | 2.816760000  | 15.281434000 |
| C | 11.852696000 | 6.885765000  | 18.681057000 |
| H | 10.909671000 | 6.420403000  | 18.378923000 |
| H | 11.615202000 | 7.670021000  | 19.406406000 |
| H | 12.452522000 | 6.127566000  | 19.197474000 |
| C | 14.134230000 | 8.756854000  | 17.989798000 |
| H | 13.676411000 | 9.616158000  | 18.489108000 |
| H | 14.857993000 | 9.131203000  | 17.258703000 |
| H | 14.695586000 | 8.193900000  | 18.745219000 |
| C | 13.823538000 | 6.192518000  | 16.417717000 |
| H | 14.409272000 | 6.554588000  | 15.566849000 |
| H | 13.190302000 | 5.372843000  | 16.066256000 |
| H | 14.524813000 | 5.776533000  | 17.150954000 |
| C | 13.896370000 | 9.060680000  | 14.016849000 |
| H | 13.714282000 | 8.111811000  | 13.505505000 |
| H | 14.770736000 | 8.929363000  | 14.662906000 |
| H | 14.157527000 | 9.812436000  | 13.262562000 |
| C | 11.020446000 | 10.137187000 | 13.780373000 |
| H | 10.163494000 | 10.592793000 | 14.292864000 |
| H | 10.659212000 | 9.313647000  | 13.155089000 |
| H | 11.421008000 | 10.905970000 | 13.109715000 |
| C | 12.906195000 | 11.266472000 | 15.845699000 |
| H | 13.762044000 | 11.139455000 | 16.513566000 |
| H | 12.091105000 | 11.709017000 | 16.424625000 |
| H | 13.194291000 | 11.986748000 | 15.070260000 |
| C | 4.466615000  | 5.319298000  | 12.532531000 |
| H | 4.254443000  | 4.401436000  | 11.975243000 |
| H | 3.755008000  | 6.081662000  | 12.200150000 |
| H | 4.250466000  | 5.112257000  | 13.586202000 |
| C | 5.916269000  | 5.767960000  | 12.371355000 |



|   |              |              |              |
|---|--------------|--------------|--------------|
| H | 6.606897000  | 4.984241000  | 12.699456000 |
| H | 6.128052000  | 6.630607000  | 13.011324000 |
| C | 5.210986000  | 7.512739000  | 10.140125000 |
| H | 5.506336000  | 7.864521000  | 9.145449000  |
| H | 4.271349000  | 6.964119000  | 10.004448000 |
| C | 4.998813000  | 8.684301000  | 11.092847000 |
| H | 4.310255000  | 9.417232000  | 10.658128000 |
| H | 5.932787000  | 9.201218000  | 11.326713000 |
| H | 4.566169000  | 8.352063000  | 12.040286000 |
| C | 5.928929000  | 4.819877000  | 9.602490000  |
| H | 4.887807000  | 4.564590000  | 9.827966000  |
| H | 5.963342000  | 5.170316000  | 8.563823000  |
| C | 6.880226000  | 3.656781000  | 9.817740000  |
| H | 6.722805000  | 2.848071000  | 9.096097000  |
| H | 6.740988000  | 3.234241000  | 10.817655000 |
| C | 9.566750000  | 2.889820000  | 10.535317000 |
| H | 9.346833000  | 1.961821000  | 9.996985000  |
| H | 10.636213000 | 3.088754000  | 10.406405000 |
| C | 9.240757000  | 2.736984000  | 12.017783000 |
| H | 8.232144000  | 2.341741000  | 12.173153000 |
| H | 9.301822000  | 3.697023000  | 12.538831000 |
| H | 9.935449000  | 2.041548000  | 12.500839000 |
| C | 8.957914000  | 3.955798000  | 7.873645000  |
| H | 8.125681000  | 4.463271000  | 7.370478000  |
| H | 9.857043000  | 4.508159000  | 7.590341000  |
| C | 9.061061000  | 2.507173000  | 7.401728000  |
| H | 9.103631000  | 2.461867000  | 6.307354000  |
| H | 8.202192000  | 1.903885000  | 7.714567000  |
| H | 9.963600000  | 2.018545000  | 7.780666000  |
| C | 12.174433000 | 6.381396000  | 11.757790000 |
| H | 13.114955000 | 6.888074000  | 11.514715000 |
| H | 11.702297000 | 6.953146000  | 12.561942000 |
| C | 12.433467000 | 4.949613000  | 12.216068000 |
| H | 12.944993000 | 4.357583000  | 11.449814000 |
| H | 11.502344000 | 4.439753000  | 12.472639000 |
| H | 13.064894000 | 4.945589000  | 13.109908000 |
| C | 11.976883000 | 5.544103000  | 8.977383000  |
| H | 11.790848000 | 4.487427000  | 9.193651000  |
| H | 11.468878000 | 5.751850000  | 8.029753000  |
| C | 13.476638000 | 5.794538000  | 8.831458000  |
| H | 13.891632000 | 5.156391000  | 8.043228000  |
| H | 14.024776000 | 5.572067000  | 9.751133000  |
| H | 13.697190000 | 6.829850000  | 8.555587000  |
| C | 11.430452000 | 8.283802000  | 9.700490000  |
| H | 11.204173000 | 8.939235000  | 10.547548000 |
| H | 12.492538000 | 8.405023000  | 9.461508000  |
| C | 10.526207000 | 8.588680000  | 8.513542000  |
| H | 10.861251000 | 8.040058000  | 7.625184000  |
| H | 10.531512000 | 9.653123000  | 8.255995000  |
| C | 8.097285000  | 7.700722000  | 7.172738000  |
| H | 8.637042000  | 6.807129000  | 6.838712000  |
| H | 7.053186000  | 7.387993000  | 7.299205000  |
| C | 8.196688000  | 8.807011000  | 6.124051000  |
| H | 7.864085000  | 8.441876000  | 5.145539000  |
| H | 9.224478000  | 9.164601000  | 6.003706000  |
| H | 7.572101000  | 9.669122000  | 6.374816000  |
| C | 7.982030000  | 9.704170000  | 9.257281000  |
| H | 8.184815000  | 10.357456000 | 8.401312000  |
| H | 6.898579000  | 9.559041000  | 9.295672000  |
| C | 8.478890000  | 10.349098000 | 10.546026000 |
| H | 9.535845000  | 10.625510000 | 10.475750000 |
| H | 8.374163000  | 9.669882000  | 11.396981000 |
| H | 7.920833000  | 11.264809000 | 10.768177000 |

**1-Sm, S=5/2, small core**

|    |             |             |              |
|----|-------------|-------------|--------------|
| Sm | 2.427138000 | 4.780453000 | 10.750741000 |
| Fe | 2.437997000 | 4.142832000 | 16.246785000 |
| P  | 0.178361000 | 3.765345000 | 16.139394000 |
| P  | 1.860915000 | 6.014487000 | 17.407957000 |
| P  | 4.704178000 | 4.421013000 | 16.392266000 |

|    |              |              |              |
|----|--------------|--------------|--------------|
| P  | 2.795209000  | 2.402216000  | 17.679283000 |
| Si | 1.671185000  | 1.318039000  | 10.726905000 |
| Si | -0.118117000 | 2.933046000  | 8.933267000  |
| Si | -0.038164000 | 7.236890000  | 10.911101000 |
| Si | 2.007931000  | 7.873604000  | 8.800463000  |
| Si | 5.287721000  | 3.613538000  | 8.812509000  |
| Si | 5.676678000  | 5.911512000  | 10.746254000 |
| N  | 2.517126000  | 4.536630000  | 13.339214000 |
| N  | 2.493983000  | 4.336215000  | 14.478375000 |
| N  | 1.232661000  | 2.883433000  | 10.065853000 |
| N  | 1.423279000  | 6.785756000  | 10.061995000 |
| N  | 4.623302000  | 4.721788000  | 10.012440000 |
| C  | 2.456113000  | 0.089228000  | 9.501029000  |
| H  | 1.762919000  | -0.220240000 | 8.715084000  |
| H  | 2.766078000  | -0.811801000 | 10.044540000 |
| H  | 3.343393000  | 0.508545000  | 9.018763000  |
| C  | 0.207358000  | 0.388138000  | 11.525674000 |
| H  | -0.302381000 | 1.010826000  | 12.267608000 |
| H  | 0.562545000  | -0.519006000 | 12.029154000 |
| H  | -0.535870000 | 0.080791000  | 10.782971000 |
| C  | 2.965347000  | 1.527109000  | 12.109453000 |
| H  | 3.818464000  | 2.146687000  | 11.809501000 |
| H  | 3.366269000  | 0.539079000  | 12.365291000 |
| H  | 2.534467000  | 1.960801000  | 13.015509000 |
| C  | -1.800966000 | 3.095568000  | 9.817488000  |
| H  | -1.984601000 | 2.230695000  | 10.463841000 |
| H  | -2.616441000 | 3.142862000  | 9.086103000  |
| H  | -1.859217000 | 3.996082000  | 10.436198000 |
| C  | -0.291047000 | 1.400849000  | 7.809633000  |
| H  | 0.608225000  | 1.241177000  | 7.206627000  |
| H  | -1.125984000 | 1.571912000  | 7.119298000  |
| H  | -0.504308000 | 0.477437000  | 8.356814000  |
| C  | 0.065240000  | 4.388413000  | 7.730517000  |
| H  | 0.243892000  | 5.334831000  | 8.249097000  |
| H  | -0.842275000 | 4.494534000  | 7.124860000  |
| H  | 0.902707000  | 4.209563000  | 7.047638000  |
| C  | -1.651655000 | 7.207360000  | 9.901129000  |
| H  | -1.782600000 | 6.256768000  | 9.376445000  |
| H  | -1.691702000 | 8.007481000  | 9.157975000  |
| H  | -2.505858000 | 7.338440000  | 10.576632000 |
| C  | 0.042793000  | 8.949122000  | 11.744024000 |
| H  | 0.936206000  | 9.046161000  | 12.369055000 |
| H  | -0.837892000 | 9.111597000  | 12.376924000 |
| H  | 0.065379000  | 9.754924000  | 11.003000000 |
| C  | -0.320390000 | 5.976891000  | 12.316404000 |
| H  | -0.366152000 | 4.944377000  | 11.945970000 |
| H  | -1.286835000 | 6.178812000  | 12.792338000 |
| H  | 0.455779000  | 6.042081000  | 13.085061000 |
| C  | 0.630710000  | 8.690977000  | 7.763548000  |
| H  | -0.035130000 | 7.948770000  | 7.312702000  |
| H  | 1.098124000  | 9.256949000  | 6.948647000  |
| H  | 0.020534000  | 9.394712000  | 8.339018000  |
| C  | 3.079260000  | 6.932799000  | 7.549834000  |
| H  | 3.848079000  | 6.331154000  | 8.042741000  |
| H  | 3.574946000  | 7.636423000  | 6.871102000  |
| H  | 2.458546000  | 6.265135000  | 6.943425000  |
| C  | 3.024519000  | 9.328920000  | 9.495388000  |
| H  | 2.417175000  | 9.947941000  | 10.163645000 |
| H  | 3.373767000  | 9.968723000  | 8.676195000  |
| H  | 3.903041000  | 8.997979000  | 10.055394000 |
| C  | 3.939576000  | 3.081103000  | 7.588357000  |
| H  | 3.032297000  | 2.744442000  | 8.098786000  |
| H  | 4.299794000  | 2.261967000  | 6.955359000  |
| H  | 3.672674000  | 3.917022000  | 6.933325000  |
| C  | 6.680236000  | 4.351811000  | 7.738901000  |
| H  | 6.355899000  | 5.257931000  | 7.218278000  |
| H  | 6.960857000  | 3.613680000  | 6.977847000  |
| H  | 7.583602000  | 4.589544000  | 8.309802000  |
| C  | 6.045663000  | 2.056111000  | 9.607289000  |
| H  | 6.860876000  | 2.325611000  | 10.287444000 |

|   |              |              |              |
|---|--------------|--------------|--------------|
| H | 6.460337000  | 1.395761000  | 8.836487000  |
| H | 5.310825000  | 1.480916000  | 10.177441000 |
| C | 6.379774000  | 7.253122000  | 9.592282000  |
| H | 5.605165000  | 7.719646000  | 8.978473000  |
| H | 7.143762000  | 6.853182000  | 8.920631000  |
| H | 6.849070000  | 8.039951000  | 10.195506000 |
| C | 7.201372000  | 5.155160000  | 11.608412000 |
| H | 6.927543000  | 4.347545000  | 12.293101000 |
| H | 7.746309000  | 5.918837000  | 12.176387000 |
| H | 7.897077000  | 4.740160000  | 10.871149000 |
| C | 4.677559000  | 6.858353000  | 12.072123000 |
| H | 3.765136000  | 7.310978000  | 11.663578000 |
| H | 5.288436000  | 7.681679000  | 12.459078000 |
| H | 4.395055000  | 6.232994000  | 12.924474000 |
| C | -0.480641000 | 3.048229000  | 14.545624000 |
| H | -0.033507000 | 3.651810000  | 13.752749000 |
| H | -0.018876000 | 2.057555000  | 14.466343000 |
| C | -1.991421000 | 2.952511000  | 14.351645000 |
| H | -2.213996000 | 2.588151000  | 13.343486000 |
| H | -2.481971000 | 3.924913000  | 14.457342000 |
| H | -2.455799000 | 2.257200000  | 15.057136000 |
| C | -0.746618000 | 2.732321000  | 17.430566000 |
| H | -0.799556000 | 1.724017000  | 17.003735000 |
| H | -0.100812000 | 2.660232000  | 18.308207000 |
| C | -2.138721000 | 3.187890000  | 17.867751000 |
| H | -2.564764000 | 2.461774000  | 18.569300000 |
| H | -2.109328000 | 4.153011000  | 18.382402000 |
| H | -2.833959000 | 3.279235000  | 17.030226000 |
| C | -0.645778000 | 5.440065000  | 16.279147000 |
| H | -0.433643000 | 5.955302000  | 15.337452000 |
| H | -1.732570000 | 5.355137000  | 16.373141000 |
| C | -0.025059000 | 6.176868000  | 17.461130000 |
| H | -0.357983000 | 5.732212000  | 18.407164000 |
| H | -0.317193000 | 7.232449000  | 17.478556000 |
| C | 2.272474000  | 6.264118000  | 19.235510000 |
| H | 1.842352000  | 5.388889000  | 19.733471000 |
| H | 3.360059000  | 6.152121000  | 19.322229000 |
| C | 1.811063000  | 7.545056000  | 19.928195000 |
| H | 0.733069000  | 7.702664000  | 19.820081000 |
| H | 2.318429000  | 8.431058000  | 19.536774000 |
| H | 2.025624000  | 7.498406000  | 21.001876000 |
| C | 2.313677000  | 7.717765000  | 16.741154000 |
| H | 1.807961000  | 8.466581000  | 17.360649000 |
| H | 3.388179000  | 7.847823000  | 16.903280000 |
| C | 1.966911000  | 7.929400000  | 15.271727000 |
| H | 2.414591000  | 7.162439000  | 14.634214000 |
| H | 2.324773000  | 8.905633000  | 14.927516000 |
| H | 0.885492000  | 7.908899000  | 15.105428000 |
| C | 5.741020000  | 3.924832000  | 14.910296000 |
| H | 5.376538000  | 4.530500000  | 14.075975000 |
| H | 6.772270000  | 4.241759000  | 15.107929000 |
| C | 5.696923000  | 2.447536000  | 14.535420000 |
| H | 6.210123000  | 2.283415000  | 13.582595000 |
| H | 6.198259000  | 1.824404000  | 15.282915000 |
| H | 4.668837000  | 2.095248000  | 14.418137000 |
| C | 5.588191000  | 6.023310000  | 16.849194000 |
| H | 5.034135000  | 6.458484000  | 17.688079000 |
| H | 6.571688000  | 5.733442000  | 17.240189000 |
| C | 5.757280000  | 7.038446000  | 15.722559000 |
| H | 6.191577000  | 7.968019000  | 16.106501000 |
| H | 6.426070000  | 6.664963000  | 14.942870000 |
| H | 4.807922000  | 7.287619000  | 15.242492000 |
| C | 5.410728000  | 3.336056000  | 17.755226000 |
| H | 6.482266000  | 3.178342000  | 17.584457000 |
| H | 5.310396000  | 3.905735000  | 18.687229000 |
| C | 4.633545000  | 2.033011000  | 17.835281000 |
| H | 4.837947000  | 1.487627000  | 18.763241000 |
| H | 4.894283000  | 1.373690000  | 17.003437000 |
| C | 2.161195000  | 0.659365000  | 17.338914000 |
| H | 2.649224000  | -0.021150000 | 18.045486000 |

|   |             |              |              |
|---|-------------|--------------|--------------|
| H | 1.093472000 | 0.648395000  | 17.579033000 |
| C | 2.388288000 | 0.195581000  | 15.904599000 |
| H | 1.958870000 | 0.897429000  | 15.184721000 |
| H | 1.935090000 | -0.787657000 | 15.738396000 |
| H | 3.453240000 | 0.106627000  | 15.669417000 |
| C | 2.385371000 | 2.582780000  | 19.524967000 |
| H | 3.097895000 | 3.337335000  | 19.879689000 |
| H | 1.400207000 | 3.055519000  | 19.592789000 |
| C | 2.436185000 | 1.344009000  | 20.416301000 |
| H | 1.659164000 | 0.620229000  | 20.153957000 |
| H | 2.282794000 | 1.620438000  | 21.465615000 |
| H | 3.401056000 | 0.829630000  | 20.357844000 |

**1-Dy, S=5/2, small core**

|    |              |              |              |
|----|--------------|--------------|--------------|
| Dy | 2.332950000  | 13.435597000 | 10.815644000 |
| Fe | 1.979425000  | 14.198870000 | 16.176621000 |
| P  | -0.281790000 | 14.390802000 | 16.010715000 |
| P  | 1.758345000  | 16.050454000 | 17.480953000 |
| P  | 2.026029000  | 12.304268000 | 17.392218000 |
| P  | 4.244222000  | 14.122550000 | 16.356973000 |
| Si | 1.901957000  | 10.312089000 | 9.063237000  |
| Si | -0.301442000 | 11.232969000 | 10.884390000 |
| Si | 0.085374000  | 15.269032000 | 8.704989000  |
| Si | 1.821357000  | 16.827028000 | 10.613737000 |
| Si | 5.495695000  | 12.171932000 | 11.141413000 |
| Si | 5.322219000  | 14.317955000 | 9.027477000  |
| N  | 2.182393000  | 13.749878000 | 13.313547000 |
| N  | 2.108034000  | 13.981871000 | 14.449054000 |
| N  | 1.276755000  | 11.543555000 | 10.173454000 |
| N  | 1.343829000  | 15.263582000 | 9.952124000  |
| N  | 4.510904000  | 13.334115000 | 10.258447000 |
| C  | 2.757379000  | 8.876480000  | 9.977784000  |
| H  | 3.589503000  | 9.209595000  | 10.602919000 |
| H  | 3.152577000  | 8.152560000  | 9.255229000  |
| H  | 2.048166000  | 8.347446000  | 10.622326000 |
| C  | 3.121281000  | 11.066483000 | 7.823975000  |
| H  | 2.590940000  | 11.710535000 | 7.115138000  |
| H  | 3.612738000  | 10.271633000 | 7.251155000  |
| H  | 3.891169000  | 11.662716000 | 8.319399000  |
| C  | 0.570461000  | 9.475961000  | 7.983692000  |
| H  | -0.131324000 | 8.861247000  | 8.555901000  |
| H  | 1.078572000  | 8.812308000  | 7.273480000  |
| H  | -0.003805000 | 10.204069000 | 7.403012000  |
| C  | -0.408584000 | 9.571958000  | 11.810573000 |
| H  | -0.371036000 | 8.720583000  | 11.123370000 |
| H  | -1.353835000 | 9.505517000  | 12.362465000 |
| H  | 0.412896000  | 9.462655000  | 12.525070000 |
| C  | -0.664064000 | 12.585663000 | 12.174834000 |
| H  | -0.026208000 | 12.485019000 | 13.056946000 |
| H  | -1.707230000 | 12.498705000 | 12.498805000 |
| H  | -0.541590000 | 13.597093000 | 11.767973000 |
| C  | -1.785414000 | 11.270252000 | 9.692250000  |
| H  | -1.791214000 | 12.169393000 | 9.070553000  |
| H  | -2.712912000 | 11.262308000 | 10.277816000 |
| H  | -1.808196000 | 10.403557000 | 9.027558000  |
| C  | -1.669099000 | 15.248398000 | 9.448540000  |
| H  | -1.858665000 | 14.358236000 | 10.054158000 |
| H  | -2.417467000 | 15.269850000 | 8.647474000  |
| H  | -1.835561000 | 16.125847000 | 10.081815000 |
| C  | 0.112033000  | 16.788001000 | 7.553304000  |
| H  | -0.113791000 | 17.728711000 | 8.064566000  |
| H  | -0.656740000 | 16.642181000 | 6.784751000  |
| H  | 1.073457000  | 16.896137000 | 7.042462000  |
| C  | 0.270724000  | 13.782739000 | 7.543577000  |
| H  | 1.166020000  | 13.895851000 | 6.923583000  |
| H  | -0.594730000 | 13.720701000 | 6.873720000  |
| H  | 0.351175000  | 12.841514000 | 8.093049000  |
| C  | 0.354515000  | 17.811211000 | 11.329763000 |
| H  | -0.349453000 | 18.123919000 | 10.551941000 |
| H  | 0.714402000  | 18.717244000 | 11.831529000 |

|   |              |              |              |
|---|--------------|--------------|--------------|
| H | -0.197336000 | 17.213345000 | 12.061905000 |
| C | 3.042511000  | 16.586078000 | 12.054845000 |
| H | 2.546564000  | 16.213330000 | 12.953853000 |
| H | 3.486744000  | 17.560544000 | 12.289416000 |
| H | 3.871891000  | 15.909756000 | 11.817013000 |
| C | 2.710821000  | 18.002012000 | 9.407396000  |
| H | 3.563871000  | 17.520820000 | 8.921485000  |
| H | 3.090848000  | 18.862844000 | 9.971108000  |
| H | 2.051544000  | 18.385164000 | 8.625359000  |
| C | 4.440377000  | 11.388076000 | 12.524122000 |
| H | 4.149004000  | 12.109304000 | 13.292091000 |
| H | 5.029864000  | 10.601249000 | 13.009397000 |
| H | 3.527610000  | 10.912561000 | 12.146036000 |
| C | 7.019632000  | 12.956583000 | 11.976174000 |
| H | 7.761668000  | 13.266136000 | 11.232891000 |
| H | 7.505345000  | 12.230710000 | 12.639312000 |
| H | 6.755461000  | 13.837001000 | 12.568256000 |
| C | 6.177910000  | 10.707472000 | 10.134435000 |
| H | 6.580688000  | 9.957009000  | 10.825606000 |
| H | 6.989188000  | 11.009424000 | 9.467467000  |
| H | 5.408305000  | 10.223400000 | 9.528706000  |
| C | 6.127522000  | 15.879734000 | 9.762368000  |
| H | 5.397149000  | 16.549696000 | 10.223621000 |
| H | 6.643291000  | 16.441591000 | 8.974648000  |
| H | 6.869823000  | 15.617335000 | 10.523168000 |
| C | 6.729385000  | 13.418715000 | 8.107725000  |
| H | 7.580296000  | 13.170728000 | 8.749552000  |
| H | 7.099946000  | 14.084844000 | 7.319166000  |
| H | 6.381781000  | 12.499241000 | 7.627300000  |
| C | 4.110091000  | 14.843896000 | 7.668236000  |
| H | 3.828948000  | 13.981873000 | 7.054951000  |
| H | 4.583600000  | 15.582275000 | 7.010862000  |
| H | 3.197883000  | 15.283039000 | 8.079940000  |
| C | -2.114578000 | 12.450267000 | 17.165492000 |
| H | -2.756587000 | 11.584486000 | 16.969722000 |
| H | -2.728201000 | 13.203408000 | 17.668430000 |
| H | -1.342918000 | 12.128291000 | 17.871165000 |
| C | -1.527043000 | 12.980234000 | 15.859647000 |
| H | -2.336291000 | 13.328062000 | 15.209956000 |
| H | -1.014871000 | 12.183921000 | 15.312347000 |
| C | -2.184952000 | 16.048863000 | 14.526327000 |
| H | -2.361737000 | 16.569996000 | 13.579482000 |
| H | -2.332427000 | 16.778670000 | 15.328966000 |
| H | -2.966496000 | 15.288080000 | 14.622859000 |
| C | -0.780124000 | 15.453228000 | 14.542596000 |
| H | -0.022105000 | 16.239840000 | 14.482166000 |
| H | -0.619273000 | 14.817545000 | 13.667115000 |
| C | -0.942554000 | 15.391168000 | 17.447632000 |
| H | -1.995682000 | 15.656322000 | 17.304567000 |
| H | -0.875766000 | 14.760186000 | 18.340234000 |
| C | -0.044954000 | 16.612150000 | 17.578799000 |
| H | -0.225674000 | 17.162495000 | 18.508136000 |
| H | -0.224138000 | 17.305218000 | 16.750962000 |
| C | 2.107422000  | 15.947399000 | 19.345342000 |
| H | 1.324553000  | 15.274727000 | 19.715596000 |
| H | 3.048320000  | 15.404625000 | 19.462906000 |
| C | 2.138520000  | 17.231709000 | 20.171118000 |
| H | 1.235162000  | 17.836630000 | 20.038606000 |
| H | 2.997243000  | 17.859787000 | 19.916472000 |
| H | 2.213936000  | 16.997726000 | 21.239257000 |
| C | 2.582738000  | 17.692632000 | 17.049930000 |
| H | 2.307123000  | 18.437052000 | 17.804393000 |
| H | 3.663166000  | 17.532631000 | 17.138093000 |
| C | 2.245163000  | 18.200001000 | 15.652350000 |
| H | 2.404517000  | 17.423293000 | 14.899253000 |
| H | 2.868491000  | 19.061562000 | 15.390011000 |
| H | 1.202390000  | 18.524710000 | 15.577960000 |
| C | 1.727737000  | 10.390339000 | 15.294288000 |
| H | 1.573812000  | 11.221148000 | 14.600957000 |
| H | 1.194673000  | 9.516508000  | 14.905223000 |

|   |             |              |              |
|---|-------------|--------------|--------------|
| H | 2.795138000 | 10.148432000 | 15.282357000 |
| C | 1.245246000 | 10.734307000 | 16.698825000 |
| H | 1.460215000 | 9.909741000  | 17.387525000 |
| H | 0.160887000 | 10.879436000 | 16.705651000 |
| C | 1.552488000 | 10.874720000 | 19.933224000 |
| H | 0.870180000 | 10.124780000 | 19.523043000 |
| H | 1.294675000 | 11.000812000 | 20.991044000 |
| H | 2.565080000 | 10.460075000 | 19.893880000 |
| C | 1.452544000 | 12.207590000 | 19.193761000 |
| H | 2.050721000 | 12.970873000 | 19.704398000 |
| H | 0.420967000 | 12.578464000 | 19.210778000 |
| C | 3.813795000 | 11.698173000 | 17.594523000 |
| H | 4.158120000 | 12.014800000 | 18.586259000 |
| H | 3.846412000 | 10.603548000 | 17.577930000 |
| C | 4.688640000 | 12.307576000 | 16.506274000 |
| H | 4.469998000 | 11.861049000 | 15.531578000 |
| H | 5.757228000 | 12.166814000 | 16.701878000 |
| C | 5.329533000 | 14.673559000 | 14.937554000 |
| H | 6.293990000 | 14.162171000 | 15.029057000 |
| H | 4.849891000 | 14.292308000 | 14.031848000 |
| C | 5.521748000 | 16.183363000 | 14.828473000 |
| H | 6.131212000 | 16.426340000 | 13.952243000 |
| H | 6.028663000 | 16.600069000 | 15.705204000 |
| H | 4.565206000 | 16.697616000 | 14.711921000 |
| C | 5.170792000 | 14.824960000 | 17.841203000 |
| H | 4.940355000 | 15.894300000 | 17.884392000 |
| H | 4.697567000 | 14.377522000 | 18.721682000 |
| C | 6.682002000 | 14.609308000 | 17.896679000 |
| H | 7.196519000 | 15.067058000 | 17.047324000 |
| H | 6.946574000 | 13.547970000 | 17.912362000 |
| H | 7.094913000 | 15.057404000 | 18.807383000 |

**1\*-Yb, S=0, small core**

|    |              |              |              |
|----|--------------|--------------|--------------|
| Yb | 6.495408000  | 14.210359000 | 3.094728000  |
| Fe | 5.675943000  | 13.497247000 | 8.375320000  |
| P  | 4.900248000  | 11.429759000 | 7.891647000  |
| P  | 7.140137000  | 12.390913000 | 9.672801000  |
| P  | 3.851284000  | 14.110846000 | 9.518451000  |
| P  | 6.454811000  | 15.537092000 | 8.971489000  |
| Si | 7.925381000  | 16.342816000 | 0.569732000  |
| Si | 6.990275000  | 17.629793000 | 3.171981000  |
| Si | 9.047809000  | 12.118193000 | 2.945834000  |
| Si | 6.643273000  | 10.858732000 | 1.558841000  |
| O  | 4.134282000  | 14.487875000 | 2.353025000  |
| N  | 6.018775000  | 14.045448000 | 5.551078000  |
| N  | 5.895138000  | 13.838059000 | 6.679581000  |
| N  | 7.135556000  | 16.265970000 | 2.115775000  |
| N  | 7.389517000  | 12.145261000 | 2.447354000  |
| C  | 7.700771000  | 14.682539000 | -0.334482000 |
| H  | 7.949877000  | 13.817741000 | 0.289581000  |
| H  | 8.332764000  | 14.642025000 | -1.229240000 |
| H  | 6.663365000  | 14.561337000 | -0.669985000 |
| C  | 9.798880000  | 16.691942000 | 0.675874000  |
| H  | 9.995546000  | 17.660989000 | 1.148638000  |
| H  | 10.256717000 | 16.710865000 | -0.320197000 |
| H  | 10.313541000 | 15.926189000 | 1.266082000  |
| C  | 7.214435000  | 17.642057000 | -0.640199000 |
| H  | 7.635477000  | 17.483348000 | -1.640463000 |
| H  | 7.444889000  | 18.668954000 | -0.343450000 |
| H  | 6.124909000  | 17.556624000 | -0.724315000 |
| C  | 5.325044000  | 17.538564000 | 4.113402000  |
| H  | 4.488876000  | 17.633244000 | 3.411907000  |
| H  | 5.242298000  | 18.355096000 | 4.840489000  |
| H  | 5.195125000  | 16.598391000 | 4.663252000  |
| C  | 7.007627000  | 19.362914000 | 2.375356000  |
| H  | 7.959019000  | 19.575712000 | 1.876785000  |
| H  | 6.865604000  | 20.125044000 | 3.151090000  |
| H  | 6.207634000  | 19.482157000 | 1.638085000  |
| C  | 8.367229000  | 17.672353000 | 4.497555000  |
| H  | 8.419445000  | 16.727413000 | 5.050599000  |

|   |              |              |              |
|---|--------------|--------------|--------------|
| H | 8.214354000  | 18.484686000 | 5.218571000  |
| H | 9.345223000  | 17.821521000 | 4.026919000  |
| C | 10.323488000 | 12.003612000 | 1.534953000  |
| H | 10.217573000 | 11.060196000 | 0.987552000  |
| H | 11.347888000 | 12.046286000 | 1.923488000  |
| H | 10.199885000 | 12.819219000 | 0.815675000  |
| C | 9.509961000  | 10.740144000 | 4.183103000  |
| H | 8.794820000  | 10.707793000 | 5.011162000  |
| H | 10.507820000 | 10.916481000 | 4.602148000  |
| H | 9.517530000  | 9.753886000  | 3.709703000  |
| C | 9.393416000  | 13.759900000 | 3.876711000  |
| H | 9.224948000  | 14.658198000 | 3.266991000  |
| H | 10.442969000 | 13.795317000 | 4.189373000  |
| H | 8.796160000  | 13.841110000 | 4.796112000  |
| C | 4.758074000  | 10.861108000 | 1.866607000  |
| H | 4.527394000  | 10.727725000 | 2.929924000  |
| H | 4.268404000  | 10.050781000 | 1.314481000  |
| H | 4.308219000  | 11.802942000 | 1.535828000  |
| C | 7.241507000  | 9.101233000  | 2.011713000  |
| H | 8.286217000  | 8.942954000  | 1.722445000  |
| H | 6.639705000  | 8.350960000  | 1.485107000  |
| H | 7.161618000  | 8.904476000  | 3.085624000  |
| C | 6.862284000  | 10.981428000 | -0.331664000 |
| H | 6.462802000  | 11.920705000 | -0.727031000 |
| H | 6.351596000  | 10.154440000 | -0.839632000 |
| H | 7.921613000  | 10.939678000 | -0.606704000 |
| C | 5.363047000  | 10.255881000 | 9.278744000  |
| H | 4.690026000  | 10.480040000 | 10.113545000 |
| H | 5.191308000  | 9.213080000  | 8.990360000  |
| C | 6.810337000  | 10.523213000 | 9.661525000  |
| H | 7.485613000  | 10.082989000 | 8.920523000  |
| H | 7.067871000  | 10.083341000 | 10.630515000 |
| C | 3.098003000  | 10.952539000 | 7.645698000  |
| H | 3.032515000  | 9.858844000  | 7.678709000  |
| H | 2.552308000  | 11.323355000 | 8.520009000  |
| C | 2.478306000  | 11.486675000 | 6.357678000  |
| H | 2.946874000  | 11.042877000 | 5.473934000  |
| H | 2.588798000  | 12.572349000 | 6.282438000  |
| H | 1.408948000  | 11.253043000 | 6.311538000  |
| C | 5.700579000  | 10.626940000 | 6.396387000  |
| H | 5.452524000  | 11.261182000 | 5.539351000  |
| H | 6.777004000  | 10.761104000 | 6.542106000  |
| C | 5.369790000  | 9.166600000  | 6.102838000  |
| H | 5.905334000  | 8.833030000  | 5.208443000  |
| H | 4.302768000  | 9.010770000  | 5.915525000  |
| H | 5.663651000  | 8.502527000  | 6.922056000  |
| C | 7.204191000  | 12.704089000 | 11.543549000 |
| H | 7.251442000  | 13.791136000 | 11.670353000 |
| H | 6.211745000  | 12.403866000 | 11.899905000 |
| C | 8.295521000  | 12.036878000 | 12.378154000 |
| H | 9.289463000  | 12.421440000 | 12.132368000 |
| H | 8.318506000  | 10.950708000 | 12.240632000 |
| H | 8.130587000  | 12.222342000 | 13.445811000 |
| C | 8.990235000  | 12.361350000 | 9.292332000  |
| H | 9.389331000  | 13.342163000 | 9.570804000  |
| H | 9.467877000  | 11.626365000 | 9.950017000  |
| C | 9.307250000  | 12.059246000 | 7.833253000  |
| H | 8.751920000  | 12.719146000 | 7.160461000  |
| H | 9.050099000  | 11.029300000 | 7.565982000  |
| H | 10.376255000 | 12.182000000 | 7.629806000  |
| C | 4.069124000  | 15.809366000 | 10.336491000 |
| H | 3.608415000  | 16.548152000 | 9.672265000  |
| H | 3.524978000  | 15.849495000 | 11.285816000 |
| C | 5.549041000  | 16.111489000 | 10.511258000 |
| H | 5.967376000  | 15.541390000 | 11.347679000 |
| H | 5.740002000  | 17.171635000 | 10.710755000 |
| C | 3.234058000  | 13.100809000 | 11.001787000 |
| H | 3.205577000  | 12.057081000 | 10.669782000 |
| H | 4.054974000  | 13.160950000 | 11.726004000 |
| C | 1.909276000  | 13.472605000 | 11.664458000 |

|   |              |              |              |
|---|--------------|--------------|--------------|
| H | 1.057202000  | 13.294383000 | 11.002124000 |
| H | 1.877742000  | 14.524450000 | 11.967588000 |
| H | 1.748843000  | 12.872854000 | 12.567792000 |
| C | 2.204821000  | 14.425630000 | 8.643501000  |
| H | 1.789373000  | 13.446512000 | 8.382593000  |
| H | 1.510311000  | 14.885582000 | 9.355574000  |
| C | 2.340226000  | 15.288838000 | 7.394823000  |
| H | 3.105483000  | 14.890920000 | 6.721339000  |
| H | 2.626470000  | 16.316776000 | 7.641882000  |
| H | 1.390560000  | 15.344320000 | 6.851521000  |
| C | 8.220002000  | 15.961795000 | 9.457096000  |
| H | 8.206002000  | 16.949494000 | 9.932859000  |
| H | 8.509200000  | 15.248306000 | 10.236252000 |
| C | 9.216436000  | 15.937068000 | 8.301287000  |
| H | 9.005954000  | 16.721236000 | 7.568381000  |
| H | 9.195827000  | 14.981144000 | 7.770943000  |
| H | 10.237407000 | 16.096473000 | 8.664746000  |
| C | 6.078165000  | 16.899285000 | 7.739059000  |
| H | 6.643735000  | 16.645367000 | 6.837553000  |
| H | 5.026717000  | 16.763513000 | 7.467766000  |
| C | 6.352012000  | 18.341925000 | 8.153020000  |
| H | 6.097223000  | 19.023044000 | 7.334098000  |
| H | 7.405788000  | 18.510859000 | 8.394432000  |
| H | 5.757930000  | 18.644761000 | 9.021403000  |
| C | 2.976426000  | 13.897484000 | 2.955121000  |
| H | 3.370208000  | 13.301774000 | 3.783129000  |
| H | 2.506888000  | 13.200574000 | 2.249686000  |
| C | 1.966616000  | 14.908139000 | 3.473210000  |
| H | 1.449624000  | 15.436630000 | 2.667315000  |
| H | 2.450363000  | 15.645619000 | 4.119409000  |
| H | 1.204326000  | 14.383571000 | 4.058049000  |
| C | 3.894230000  | 15.325207000 | 1.204841000  |
| H | 3.180987000  | 16.111818000 | 1.477614000  |
| H | 4.859402000  | 15.809603000 | 1.029826000  |
| C | 3.419411000  | 14.556088000 | -0.014652000 |
| H | 3.346282000  | 15.242313000 | -0.864586000 |
| H | 2.431741000  | 14.105979000 | 0.127685000  |
| H | 4.125275000  | 13.764063000 | -0.280209000 |

**1\*-Sm, S=3, small core**

|    |              |              |              |
|----|--------------|--------------|--------------|
| Sm | 7.949596000  | 12.054914000 | 15.210201000 |
| Fe | 8.164363000  | 9.689855000  | 20.163447000 |
| P  | 9.767309000  | 8.292222000  | 19.398656000 |
| P  | 9.672879000  | 10.199978000 | 21.737737000 |
| P  | 6.779658000  | 8.054559000  | 20.813391000 |
| P  | 6.566437000  | 11.062297000 | 20.979915000 |
| Si | 4.573655000  | 11.873641000 | 14.460902000 |
| Si | 5.898771000  | 14.522967000 | 13.591043000 |
| Si | 10.112874000 | 11.191665000 | 12.608073000 |
| Si | 11.267257000 | 13.064179000 | 14.829769000 |
| N  | 8.015371000  | 10.991725000 | 17.588741000 |
| N  | 8.075623000  | 10.471704000 | 18.616460000 |
| N  | 5.911386000  | 12.953939000 | 14.322489000 |
| N  | 10.051331000 | 12.115798000 | 14.062183000 |
| C  | 5.251646000  | 10.172988000 | 15.041904000 |
| H  | 5.933223000  | 9.727045000  | 14.305928000 |
| H  | 4.426150000  | 9.463770000  | 15.170685000 |
| H  | 5.762780000  | 10.224520000 | 16.013582000 |
| C  | 3.283514000  | 12.387201000 | 15.769131000 |
| H  | 2.503721000  | 11.625274000 | 15.886058000 |
| H  | 2.795426000  | 13.328097000 | 15.495212000 |
| H  | 3.763134000  | 12.536331000 | 16.742894000 |
| C  | 3.621361000  | 11.540063000 | 12.845630000 |
| H  | 3.119762000  | 12.446203000 | 12.488585000 |
| H  | 2.852732000  | 10.771646000 | 12.989481000 |
| H  | 4.296647000  | 11.200816000 | 12.053296000 |
| C  | 4.468683000  | 15.648137000 | 14.161706000 |
| H  | 3.497900000  | 15.253972000 | 13.841104000 |
| H  | 4.570203000  | 16.655336000 | 13.740810000 |
| H  | 4.447466000  | 15.738673000 | 15.253001000 |



|   |              |              |              |
|---|--------------|--------------|--------------|
| C | 5.848606000  | 14.486017000 | 11.687633000 |
| H | 6.686186000  | 13.905143000 | 11.286721000 |
| H | 5.908243000  | 15.496866000 | 11.267451000 |
| H | 4.923816000  | 14.026242000 | 11.323788000 |
| C | 7.520664000  | 15.408551000 | 14.077114000 |
| H | 7.575704000  | 15.579511000 | 15.159842000 |
| H | 7.592731000  | 16.389874000 | 13.594782000 |
| H | 8.405757000  | 14.838327000 | 13.765638000 |
| C | 8.458736000  | 10.225939000 | 12.498380000 |
| H | 8.344318000  | 9.511357000  | 13.325959000 |
| H | 8.412344000  | 9.636100000  | 11.576179000 |
| H | 7.584788000  | 10.892240000 | 12.479817000 |
| C | 10.248412000 | 12.222285000 | 11.014384000 |
| H | 9.440208000  | 12.958685000 | 10.955538000 |
| H | 10.195398000 | 11.588300000 | 10.121643000 |
| H | 11.196381000 | 12.769711000 | 10.979265000 |
| C | 11.500350000 | 9.885294000  | 12.547339000 |
| H | 12.487893000 | 10.357983000 | 12.510399000 |
| H | 11.405177000 | 9.249555000  | 11.659262000 |
| H | 11.475161000 | 9.238985000  | 13.431195000 |
| C | 11.968585000 | 14.488252000 | 13.779316000 |
| H | 12.512380000 | 14.103368000 | 12.909743000 |
| H | 12.664232000 | 15.106110000 | 14.359185000 |
| H | 11.167573000 | 15.136022000 | 13.408686000 |
| C | 12.758656000 | 12.066369000 | 15.476202000 |
| H | 12.426578000 | 11.275596000 | 16.157433000 |
| H | 13.464279000 | 12.707306000 | 16.017747000 |
| H | 13.303087000 | 11.589336000 | 14.654597000 |
| C | 10.463071000 | 13.866689000 | 16.377931000 |
| H | 9.662606000  | 14.569220000 | 16.111440000 |
| H | 11.204584000 | 14.444887000 | 16.940588000 |
| H | 10.063850000 | 13.117076000 | 17.075807000 |
| C | 8.857617000  | 6.588787000  | 17.276834000 |
| H | 9.516515000  | 7.044928000  | 16.531785000 |
| H | 7.916534000  | 7.145405000  | 17.268571000 |
| H | 8.646110000  | 5.567637000  | 16.941876000 |
| C | 9.497628000  | 6.583592000  | 18.662797000 |
| H | 10.467729000 | 6.073575000  | 18.636341000 |
| H | 8.876019000  | 6.030435000  | 19.375183000 |
| C | 10.913695000 | 9.059280000  | 18.124194000 |
| H | 10.283141000 | 9.291502000  | 17.259719000 |
| H | 11.197813000 | 10.030734000 | 18.540880000 |
| C | 12.146342000 | 8.268166000  | 17.695507000 |
| H | 12.717976000 | 8.834046000  | 16.952373000 |
| H | 11.885556000 | 7.308369000  | 17.239088000 |
| H | 12.819743000 | 8.065356000  | 18.534455000 |
| C | 10.933555000 | 7.868441000  | 20.805108000 |
| H | 10.401563000 | 7.150393000  | 21.438806000 |
| H | 11.837860000 | 7.372167000  | 20.436130000 |
| C | 11.242244000 | 9.145276000  | 21.572209000 |
| H | 11.976150000 | 9.746495000  | 21.025365000 |
| H | 11.669759000 | 8.938919000  | 22.558855000 |
| C | 10.479342000 | 11.908287000 | 21.806653000 |
| H | 9.731771000  | 12.596898000 | 22.214294000 |
| H | 11.305566000 | 11.875921000 | 22.525895000 |
| C | 10.968769000 | 12.407358000 | 20.451885000 |
| H | 10.177928000 | 12.347567000 | 19.698260000 |
| H | 11.816113000 | 11.818682000 | 20.084348000 |
| H | 11.306978000 | 13.447228000 | 20.516003000 |
| C | 9.286431000  | 9.952664000  | 23.578505000 |
| H | 8.307933000  | 10.416174000 | 23.747754000 |
| H | 9.126056000  | 8.872456000  | 23.677323000 |
| C | 10.283575000 | 10.442112000 | 24.626658000 |
| H | 11.288134000 | 10.037384000 | 24.464384000 |
| H | 9.970402000  | 10.132090000 | 25.630266000 |
| H | 10.364635000 | 11.532841000 | 24.635192000 |
| C | 7.336963000  | 6.739033000  | 22.061385000 |
| H | 8.300526000  | 6.364894000  | 21.697349000 |
| H | 7.562102000  | 7.308677000  | 22.970736000 |
| C | 6.410689000  | 5.567484000  | 22.380640000 |

|   |             |              |              |
|---|-------------|--------------|--------------|
| H | 6.273928000 | 4.908396000  | 21.518543000 |
| H | 5.418274000 | 5.899151000  | 22.703680000 |
| H | 6.825868000 | 4.958556000  | 23.191970000 |
| C | 5.906833000 | 6.947963000  | 19.553892000 |
| H | 6.654209000 | 6.240250000  | 19.179993000 |
| H | 5.144933000 | 6.357643000  | 20.075494000 |
| C | 5.286847000 | 7.718126000  | 18.393966000 |
| H | 4.909204000 | 7.034609000  | 17.625847000 |
| H | 6.015929000 | 8.389270000  | 17.930627000 |
| H | 4.439654000 | 8.330794000  | 18.720507000 |
| C | 5.250368000 | 8.744543000  | 21.701459000 |
| H | 4.445744000 | 8.794994000  | 20.960352000 |
| H | 4.919924000 | 8.055251000  | 22.485319000 |
| C | 5.546988000 | 10.132207000 | 22.249625000 |
| H | 6.163319000 | 10.071811000 | 23.153404000 |
| H | 4.636853000 | 10.683298000 | 22.510797000 |
| C | 6.849977000 | 12.678390000 | 21.897058000 |
| H | 5.906641000 | 12.960776000 | 22.379025000 |
| H | 7.557342000 | 12.459291000 | 22.704253000 |
| C | 7.365864000 | 13.816643000 | 21.020239000 |
| H | 6.620835000 | 14.123228000 | 20.279821000 |
| H | 8.270082000 | 13.529431000 | 20.476727000 |
| H | 7.603843000 | 14.697718000 | 21.625834000 |
| C | 5.281474000 | 11.587040000 | 19.713872000 |
| H | 5.827377000 | 12.175481000 | 18.968993000 |
| H | 4.990591000 | 10.667252000 | 19.196795000 |
| C | 4.052414000 | 12.345825000 | 20.206667000 |
| H | 3.395498000 | 12.587650000 | 19.364348000 |
| H | 4.314720000 | 13.290306000 | 20.693289000 |
| H | 3.462145000 | 11.758588000 | 20.917367000 |

### 3, S=3, small core

|    |              |              |              |
|----|--------------|--------------|--------------|
| Sm | 5.255327000  | 17.944420000 | 19.118625000 |
| Fe | 6.873958000  | 12.583694000 | 18.859109000 |
| Fe | 4.450456000  | 19.492533000 | 13.771504000 |
| P  | 8.846330000  | 12.974016000 | 17.810396000 |
| P  | 6.542386000  | 11.122076000 | 17.195977000 |
| P  | 7.796636000  | 11.704481000 | 20.699824000 |
| P  | 4.897610000  | 12.165155000 | 19.898430000 |
| P  | 6.368949000  | 20.689903000 | 13.851153000 |
| P  | 3.535090000  | 21.442391000 | 13.164296000 |
| P  | 2.512771000  | 18.346909000 | 13.568537000 |
| P  | 5.110242000  | 18.248944000 | 12.042137000 |
| Si | 8.503353000  | 19.427555000 | 19.627976000 |
| Si | 6.084570000  | 21.215253000 | 20.249235000 |
| Si | 4.021535000  | 17.324018000 | 22.399882000 |
| Si | 1.824196000  | 17.564853000 | 20.283040000 |
| N  | 6.432972000  | 14.276600000 | 18.786435000 |
| N  | 6.124415000  | 15.384499000 | 18.762210000 |
| N  | 4.781992000  | 18.621969000 | 16.522446000 |
| N  | 4.647307000  | 18.972790000 | 15.436653000 |
| N  | 6.807567000  | 19.743326000 | 19.689232000 |
| N  | 3.481809000  | 17.516381000 | 20.764559000 |
| C  | 10.786846000 | 14.541536000 | 19.263901000 |
| H  | 10.799651000 | 15.356405000 | 18.535184000 |
| H  | 11.752161000 | 14.550325000 | 19.782000000 |
| H  | 10.012415000 | 14.778285000 | 19.997637000 |
| C  | 10.546183000 | 13.193750000 | 18.591122000 |
| H  | 10.663080000 | 12.372586000 | 19.306947000 |
| H  | 11.291275000 | 13.023799000 | 17.804603000 |
| C  | 9.972691000  | 14.603044000 | 15.655291000 |
| H  | 9.831957000  | 15.504412000 | 15.048524000 |
| H  | 10.074222000 | 13.760595000 | 14.963384000 |
| H  | 10.925956000 | 14.716500000 | 16.180919000 |
| C  | 8.800460000  | 14.423135000 | 16.615598000 |
| H  | 7.858587000  | 14.313062000 | 16.067964000 |
| H  | 8.672830000  | 15.313783000 | 17.239255000 |
| C  | 9.239818000  | 11.528189000 | 16.679925000 |
| H  | 10.064790000 | 11.767651000 | 15.999680000 |
| H  | 9.577813000  | 10.713397000 | 17.331462000 |

|   |              |              |              |
|---|--------------|--------------|--------------|
| C | 7.965022000  | 11.146213000 | 15.947199000 |
| H | 8.050250000  | 10.180489000 | 15.437420000 |
| H | 7.728931000  | 11.895952000 | 15.185329000 |
| C | 6.500485000  | 9.248343000  | 17.517264000 |
| H | 7.531177000  | 9.020310000  | 17.815953000 |
| H | 5.890591000  | 9.094083000  | 18.410676000 |
| C | 6.049217000  | 8.306803000  | 16.402925000 |
| H | 6.603642000  | 8.466999000  | 15.471854000 |
| H | 4.984967000  | 8.424112000  | 16.177351000 |
| H | 6.205215000  | 7.261409000  | 16.694027000 |
| C | 5.084314000  | 11.321670000 | 16.008850000 |
| H | 5.126942000  | 10.543142000 | 15.239271000 |
| H | 4.175953000  | 11.143812000 | 16.594936000 |
| C | 5.024374000  | 12.705324000 | 15.368892000 |
| H | 4.068687000  | 12.858467000 | 14.855412000 |
| H | 5.815015000  | 12.840564000 | 14.623820000 |
| H | 5.142236000  | 13.491503000 | 16.121099000 |
| C | 9.328595000  | 9.500963000  | 21.942884000 |
| H | 9.793500000  | 8.525016000  | 21.760394000 |
| H | 8.533635000  | 9.348011000  | 22.680046000 |
| H | 10.089071000 | 10.138853000 | 22.402347000 |
| C | 8.791758000  | 10.094212000 | 20.641564000 |
| H | 8.119548000  | 9.384435000  | 20.145867000 |
| H | 9.613396000  | 10.269836000 | 19.936133000 |
| C | 8.923223000  | 12.728835000 | 21.820238000 |
| H | 9.136800000  | 12.144429000 | 22.722186000 |
| H | 9.873992000  | 12.855568000 | 21.293393000 |
| C | 8.337183000  | 14.085855000 | 22.191742000 |
| H | 8.022983000  | 14.637580000 | 21.300830000 |
| H | 9.067440000  | 14.696851000 | 22.733340000 |
| H | 7.460472000  | 13.983207000 | 22.838820000 |
| C | 6.465683000  | 11.227219000 | 21.961431000 |
| H | 6.224534000  | 10.169214000 | 21.801664000 |
| H | 6.854545000  | 11.319917000 | 22.981168000 |
| C | 5.234420000  | 12.095384000 | 21.741543000 |
| H | 5.419929000  | 13.127601000 | 22.054513000 |
| H | 4.363015000  | 11.734145000 | 22.298649000 |
| C | 3.958958000  | 10.540165000 | 19.676654000 |
| H | 3.819082000  | 10.389116000 | 18.601963000 |
| H | 4.658130000  | 9.761870000  | 20.002348000 |
| C | 2.625173000  | 10.381296000 | 20.403850000 |
| H | 2.231192000  | 9.369138000  | 20.257078000 |
| H | 1.870081000  | 11.080450000 | 20.033988000 |
| H | 2.719481000  | 10.536620000 | 21.482867000 |
| C | 3.505330000  | 13.409521000 | 19.821130000 |
| H | 2.783973000  | 13.152507000 | 20.604424000 |
| H | 3.926213000  | 14.383588000 | 20.089511000 |
| C | 2.825468000  | 13.487370000 | 18.457904000 |
| H | 3.531084000  | 13.806535000 | 17.686711000 |
| H | 2.003600000  | 14.209505000 | 18.481491000 |
| H | 2.405161000  | 12.523412000 | 18.149846000 |
| C | 8.783168000  | 17.860607000 | 18.565794000 |
| H | 8.335743000  | 16.969514000 | 19.022852000 |
| H | 9.855575000  | 17.663534000 | 18.455312000 |
| H | 8.362702000  | 17.978277000 | 17.559712000 |
| C | 9.323322000  | 19.069856000 | 21.313315000 |
| H | 9.258817000  | 19.939960000 | 21.975395000 |
| H | 10.384889000 | 18.822948000 | 21.190089000 |
| H | 8.836876000  | 18.232567000 | 21.823928000 |
| C | 9.581912000  | 20.783674000 | 18.823966000 |
| H | 10.609380000 | 20.424114000 | 18.690084000 |
| H | 9.628808000  | 21.683397000 | 19.446507000 |
| H | 9.195844000  | 21.078255000 | 17.843164000 |
| C | 6.401800000  | 21.598784000 | 22.090036000 |
| H | 6.124402000  | 20.753890000 | 22.728033000 |
| H | 5.827641000  | 22.473664000 | 22.417398000 |
| H | 7.461474000  | 21.813862000 | 22.268212000 |
| C | 6.591265000  | 22.795252000 | 19.302802000 |
| H | 7.660349000  | 23.011135000 | 19.392679000 |
| H | 6.042324000  | 23.661250000 | 19.691998000 |

|   |              |              |              |
|---|--------------|--------------|--------------|
| H | 6.352520000  | 22.699457000 | 18.238844000 |
| C | 4.198174000  | 21.082305000 | 20.001275000 |
| H | 3.947120000  | 20.991800000 | 18.935833000 |
| H | 3.694073000  | 21.981800000 | 20.372916000 |
| H | 3.769307000  | 20.224689000 | 20.532994000 |
| C | 5.927430000  | 17.249153000 | 22.379580000 |
| H | 6.284046000  | 16.393738000 | 21.791328000 |
| H | 6.325873000  | 17.130145000 | 23.393551000 |
| H | 6.368531000  | 18.163059000 | 21.963234000 |
| C | 3.445623000  | 15.720076000 | 23.266450000 |
| H | 2.368791000  | 15.727252000 | 23.463026000 |
| H | 3.956894000  | 15.604591000 | 24.229950000 |
| H | 3.664138000  | 14.835545000 | 22.659763000 |
| C | 3.524963000  | 18.736383000 | 23.581056000 |
| H | 3.819113000  | 19.712420000 | 23.182843000 |
| H | 3.999658000  | 18.613938000 | 24.561943000 |
| H | 2.441022000  | 18.756227000 | 23.739579000 |
| C | 0.864092000  | 19.137424000 | 20.778516000 |
| H | 0.800428000  | 19.237713000 | 21.867151000 |
| H | -0.160209000 | 19.106084000 | 20.387361000 |
| H | 1.346999000  | 20.040456000 | 20.392245000 |
| C | 1.757576000  | 17.500864000 | 18.372565000 |
| H | 2.227408000  | 18.380616000 | 17.915700000 |
| H | 0.717254000  | 17.474399000 | 18.028651000 |
| H | 2.257091000  | 16.604483000 | 17.986505000 |
| C | 0.740460000  | 16.112825000 | 20.891991000 |
| H | 1.215243000  | 15.144216000 | 20.707794000 |
| H | -0.231558000 | 16.118755000 | 20.383988000 |
| H | 0.547248000  | 16.185952000 | 21.967498000 |
| C | 8.713455000  | 19.100238000 | 14.317063000 |
| H | 9.666163000  | 18.726633000 | 13.925460000 |
| H | 8.061446000  | 18.239948000 | 14.492653000 |
| H | 8.918779000  | 19.559109000 | 15.288478000 |
| C | 8.081637000  | 20.095947000 | 13.348450000 |
| H | 7.981946000  | 19.657420000 | 12.349796000 |
| H | 8.720982000  | 20.979273000 | 13.236078000 |
| C | 6.739238000  | 21.499409000 | 15.503487000 |
| H | 5.792995000  | 21.950238000 | 15.819268000 |
| H | 6.917657000  | 20.687026000 | 16.216109000 |
| C | 7.870599000  | 22.523190000 | 15.547192000 |
| H | 7.679181000  | 23.378001000 | 14.890433000 |
| H | 8.833482000  | 22.090751000 | 15.257764000 |
| H | 7.985347000  | 22.915407000 | 16.562211000 |
| C | 6.196806000  | 22.174405000 | 12.716560000 |
| H | 7.024017000  | 22.879384000 | 12.852819000 |
| H | 6.255580000  | 21.792134000 | 11.691846000 |
| C | 4.839721000  | 22.806357000 | 12.980565000 |
| H | 4.550357000  | 23.510431000 | 12.193481000 |
| H | 4.858188000  | 23.366345000 | 13.921548000 |
| C | 2.751019000  | 22.428146000 | 15.733433000 |
| H | 3.633590000  | 23.063856000 | 15.861430000 |
| H | 3.006573000  | 21.435418000 | 16.116047000 |
| H | 1.959938000  | 22.849146000 | 16.363447000 |
| C | 2.310865000  | 22.360303000 | 14.275170000 |
| H | 2.157887000  | 23.367550000 | 13.870903000 |
| H | 1.351870000  | 21.838008000 | 14.194415000 |
| C | 2.653592000  | 21.616822000 | 11.491034000 |
| H | 3.445262000  | 21.431093000 | 10.755014000 |
| H | 1.968529000  | 20.765569000 | 11.412074000 |
| C | 1.912464000  | 22.911958000 | 11.165703000 |
| H | 1.551270000  | 22.900888000 | 10.130686000 |
| H | 2.552038000  | 23.794390000 | 11.273308000 |
| H | 1.041416000  | 23.055986000 | 11.811559000 |
| C | 0.771080000  | 19.031520000 | 13.767615000 |
| H | 0.718835000  | 19.930947000 | 13.144712000 |
| H | 0.076551000  | 18.308243000 | 13.323663000 |
| C | 0.367593000  | 19.346241000 | 15.204636000 |
| H | -0.615020000 | 19.829737000 | 15.236257000 |
| H | 1.084636000  | 20.013127000 | 15.690746000 |
| H | 0.306885000  | 18.440260000 | 15.813241000 |

|   |             |              |              |
|---|-------------|--------------|--------------|
| C | 2.417133000 | 16.792105000 | 14.617081000 |
| H | 3.380101000 | 16.290618000 | 14.476239000 |
| H | 2.418166000 | 17.140359000 | 15.654593000 |
| C | 1.259292000 | 15.827751000 | 14.376896000 |
| H | 1.267661000 | 15.413618000 | 13.363351000 |
| H | 0.285786000 | 16.302544000 | 14.533358000 |
| H | 1.319145000 | 14.982822000 | 15.071822000 |
| C | 2.377727000 | 17.673784000 | 11.821288000 |
| H | 1.569351000 | 16.938523000 | 11.740129000 |
| H | 2.111205000 | 18.524318000 | 11.184092000 |
| C | 3.729359000 | 17.103100000 | 11.424377000 |
| H | 3.811963000 | 16.948558000 | 10.343452000 |
| H | 3.883393000 | 16.128771000 | 11.900506000 |
| C | 5.638255000 | 19.043647000 | 10.399531000 |
| H | 4.736295000 | 19.561591000 | 10.051966000 |
| H | 6.353383000 | 19.832193000 | 10.658812000 |
| C | 6.213350000 | 18.166268000 | 9.289496000  |
| H | 6.368404000 | 18.751602000 | 8.375614000  |
| H | 5.548067000 | 17.335927000 | 9.029858000  |
| H | 7.180920000 | 17.738519000 | 9.568021000  |
| C | 6.483752000 | 16.960537000 | 12.222729000 |
| H | 6.503882000 | 16.337506000 | 11.321119000 |
| H | 7.433065000 | 17.505351000 | 12.253380000 |
| C | 6.334989000 | 16.096664000 | 13.469324000 |
| H | 5.451587000 | 15.451753000 | 13.411514000 |
| H | 6.229913000 | 16.711763000 | 14.367987000 |
| H | 7.203488000 | 15.440696000 | 13.596144000 |

**1-U, S=3/2, small core**

|    |              |              |              |
|----|--------------|--------------|--------------|
| U  | 8.468519000  | 15.065209000 | 2.410495000  |
| Fe | 8.994482000  | 13.697899000 | -2.830795000 |
| P  | 11.251060000 | 13.920303000 | -2.656165000 |
| P  | 9.517329000  | 11.715948000 | -3.801507000 |
| P  | 8.684965000  | 15.342043000 | -4.356002000 |
| P  | 6.739719000  | 13.412462000 | -2.999705000 |
| Si | 9.369490000  | 11.748978000 | 3.076280000  |
| Si | 10.994610000 | 13.702343000 | 4.710935000  |
| Si | 10.334485000 | 18.045767000 | 1.938802000  |
| Si | 8.792817000  | 18.025642000 | 4.529374000  |
| Si | 5.221975000  | 16.173216000 | 1.850554000  |
| Si | 5.270439000  | 14.083677000 | 4.020219000  |
| N  | 8.704553000  | 14.405403000 | -0.025305000 |
| N  | 8.815597000  | 14.091957000 | -1.140903000 |
| N  | 9.722815000  | 13.419568000 | 3.511365000  |
| N  | 9.251940000  | 17.194533000 | 3.035929000  |
| N  | 6.161723000  | 15.045964000 | 2.829783000  |
| C  | 8.865524000  | 10.637660000 | 4.538568000  |
| H  | 7.923608000  | 10.962921000 | 4.988559000  |
| H  | 9.623093000  | 10.621000000 | 5.327880000  |
| H  | 8.732086000  | 9.607021000  | 4.188434000  |
| C  | 7.927621000  | 11.706863000 | 1.835229000  |
| H  | 8.246832000  | 12.044860000 | 0.845377000  |
| H  | 7.066522000  | 12.311806000 | 2.137850000  |
| H  | 7.575077000  | 10.673040000 | 1.739142000  |
| C  | 10.794461000 | 10.852215000 | 2.181568000  |
| H  | 11.592401000 | 10.542626000 | 2.860650000  |
| H  | 11.234975000 | 11.492186000 | 1.410790000  |
| H  | 10.406906000 | 9.951186000  | 1.691194000  |
| C  | 12.064089000 | 15.192844000 | 4.229962000  |
| H  | 11.451534000 | 16.072350000 | 4.016766000  |
| H  | 12.658088000 | 14.960078000 | 3.338894000  |
| H  | 12.760083000 | 15.443198000 | 5.039020000  |
| C  | 12.252150000 | 12.283139000 | 4.928117000  |
| H  | 12.836107000 | 12.114356000 | 4.018283000  |
| H  | 11.807343000 | 11.331269000 | 5.231686000  |
| H  | 12.953719000 | 12.581099000 | 5.716873000  |
| C  | 10.257223000 | 14.004971000 | 6.436408000  |
| H  | 9.667088000  | 13.142813000 | 6.763900000  |
| H  | 9.600140000  | 14.879489000 | 6.452424000  |
| H  | 11.050658000 | 14.171101000 | 7.174298000  |

|   |              |              |              |
|---|--------------|--------------|--------------|
| C | 11.793007000 | 18.949424000 | 2.762905000  |
| H | 12.377136000 | 18.287019000 | 3.407923000  |
| H | 11.463876000 | 19.805128000 | 3.360527000  |
| H | 12.459685000 | 19.334468000 | 1.981890000  |
| C | 11.127229000 | 16.790134000 | 0.743389000  |
| H | 10.392084000 | 16.251434000 | 0.135215000  |
| H | 11.732573000 | 16.059725000 | 1.290418000  |
| H | 11.790181000 | 17.326160000 | 0.053792000  |
| C | 9.471602000  | 19.353476000 | 0.856416000  |
| H | 9.008485000  | 20.135835000 | 1.464517000  |
| H | 8.691119000  | 18.915281000 | 0.227717000  |
| H | 10.203212000 | 19.834127000 | 0.195594000  |
| C | 10.204027000 | 18.202351000 | 5.796275000  |
| H | 11.024665000 | 18.831521000 | 5.443069000  |
| H | 10.621249000 | 17.228731000 | 6.070035000  |
| H | 9.804383000  | 18.659528000 | 6.709693000  |
| C | 7.445647000  | 17.053839000 | 5.441034000  |
| H | 7.806074000  | 16.068744000 | 5.754759000  |
| H | 6.550549000  | 16.904827000 | 4.834252000  |
| H | 7.165646000  | 17.598124000 | 6.350557000  |
| C | 8.123711000  | 19.784284000 | 4.228686000  |
| H | 7.314650000  | 19.793540000 | 3.491698000  |
| H | 8.906213000  | 20.465077000 | 3.877039000  |
| H | 7.730231000  | 20.196679000 | 5.165080000  |
| C | 6.288016000  | 16.859412000 | 0.427901000  |
| H | 6.725236000  | 16.082459000 | -0.206731000 |
| H | 7.096706000  | 17.493096000 | 0.807646000  |
| H | 5.655469000  | 17.493687000 | -0.205543000 |
| C | 3.688260000  | 15.383258000 | 1.038930000  |
| H | 2.935232000  | 15.094335000 | 1.778803000  |
| H | 3.949575000  | 14.491380000 | 0.461836000  |
| H | 3.218537000  | 16.103118000 | 0.358027000  |
| C | 4.602586000  | 17.723387000 | 2.763012000  |
| H | 5.433093000  | 18.282709000 | 3.203482000  |
| H | 3.892392000  | 17.491159000 | 3.560304000  |
| H | 4.097575000  | 18.385800000 | 2.049473000  |
| C | 4.417587000  | 12.556010000 | 3.259754000  |
| H | 5.132054000  | 11.820190000 | 2.880279000  |
| H | 3.751487000  | 12.834661000 | 2.437805000  |
| H | 3.810617000  | 12.060065000 | 4.026790000  |
| C | 3.875893000  | 15.032339000 | 4.910360000  |
| H | 3.058216000  | 15.327306000 | 4.245447000  |
| H | 4.250911000  | 15.929975000 | 5.411431000  |
| H | 3.449672000  | 14.377883000 | 5.680412000  |
| C | 6.415598000  | 13.470448000 | 5.405623000  |
| H | 6.524315000  | 14.234775000 | 6.180841000  |
| H | 7.417130000  | 13.212573000 | 5.049148000  |
| H | 5.984178000  | 12.580131000 | 5.877909000  |
| C | 13.280908000 | 12.694082000 | -0.903321000 |
| H | 13.521105000 | 12.463530000 | 0.140334000  |
| H | 14.095105000 | 13.306278000 | -1.298192000 |
| H | 13.286309000 | 11.744812000 | -1.448194000 |
| C | 11.922591000 | 13.389332000 | -0.977893000 |
| H | 11.916249000 | 14.294552000 | -0.361402000 |
| H | 11.146277000 | 12.741577000 | -0.561653000 |
| C | 12.134457000 | 15.543888000 | -2.987106000 |
| H | 11.914340000 | 15.776192000 | -4.035740000 |
| H | 11.608323000 | 16.290807000 | -2.383850000 |
| C | 13.637745000 | 15.631024000 | -2.735073000 |
| H | 13.876389000 | 15.508853000 | -1.675347000 |
| H | 14.014553000 | 16.613983000 | -3.039653000 |
| H | 14.198393000 | 14.879209000 | -3.299165000 |
| C | 12.098228000 | 12.761603000 | -3.857860000 |
| H | 11.986503000 | 13.210929000 | -4.851770000 |
| H | 13.169709000 | 12.674798000 | -3.650867000 |
| C | 11.383745000 | 11.420821000 | -3.782016000 |
| H | 11.622612000 | 10.918485000 | -2.839385000 |
| H | 11.678970000 | 10.747002000 | -4.593470000 |
| C | 9.290911000  | 9.909793000  | -1.595944000 |
| H | 9.003034000  | 10.788667000 | -1.012175000 |

|   |              |              |              |
|---|--------------|--------------|--------------|
| H | 10.365809000 | 9.760258000  | -1.454664000 |
| H | 8.786655000  | 9.036060000  | -1.169494000 |
| C | 8.929706000  | 10.079752000 | -3.067888000 |
| H | 7.841381000  | 10.053295000 | -3.191763000 |
| H | 9.338830000  | 9.254609000  | -3.660705000 |
| C | 9.207523000  | 11.422704000 | -5.651594000 |
| H | 8.199805000  | 11.787429000 | -5.866138000 |
| H | 9.891549000  | 12.126679000 | -6.140676000 |
| C | 9.389979000  | 10.019063000 | -6.224671000 |
| H | 8.627800000  | 9.326323000  | -5.856136000 |
| H | 10.369375000 | 9.593215000  | -5.982116000 |
| H | 9.309633000  | 10.037678000 | -7.317628000 |
| C | 9.325601000  | 15.220180000 | -6.131998000 |
| H | 10.412406000 | 15.089713000 | -6.053158000 |
| H | 8.935300000  | 14.263345000 | -6.496306000 |
| C | 8.995796000  | 16.339111000 | -7.118291000 |
| H | 9.472604000  | 17.284022000 | -6.842978000 |
| H | 7.917860000  | 16.517915000 | -7.187445000 |
| H | 9.346736000  | 16.081686000 | -8.124252000 |
| C | 9.159974000  | 17.128951000 | -3.973747000 |
| H | 10.249681000 | 17.198513000 | -4.034487000 |
| H | 8.757596000  | 17.761713000 | -4.772614000 |
| C | 8.668589000  | 17.612629000 | -2.615388000 |
| H | 8.996635000  | 16.947739000 | -1.812074000 |
| H | 7.575786000  | 17.657653000 | -2.574773000 |
| H | 9.041761000  | 18.619129000 | -2.399620000 |
| C | 6.831582000  | 15.593744000 | -4.674387000 |
| H | 6.624105000  | 16.649019000 | -4.880954000 |
| H | 6.568845000  | 15.030608000 | -5.577948000 |
| C | 6.038933000  | 15.082477000 | -3.478381000 |
| H | 4.964056000  | 15.026666000 | -3.681791000 |
| H | 6.178083000  | 15.730301000 | -2.607149000 |
| C | 5.960296000  | 12.322788000 | -4.326236000 |
| H | 6.404965000  | 12.649835000 | -5.271997000 |
| H | 6.327747000  | 11.305796000 | -4.155612000 |
| C | 4.436987000  | 12.321905000 | -4.439086000 |
| H | 3.953675000  | 11.987459000 | -3.516925000 |
| H | 4.116732000  | 11.644367000 | -5.238526000 |
| H | 4.041725000  | 13.312906000 | -4.680468000 |
| C | 5.708929000  | 12.981358000 | -1.498626000 |
| H | 6.116319000  | 13.572350000 | -0.672992000 |
| H | 4.689101000  | 13.339995000 | -1.677831000 |
| C | 5.705156000  | 11.500179000 | -1.131891000 |
| H | 5.133548000  | 11.338385000 | -0.212888000 |
| H | 6.717805000  | 11.131480000 | -0.954175000 |
| H | 5.251630000  | 10.882871000 | -1.914388000 |

**2, S=3/2, small core**

|    |              |              |              |
|----|--------------|--------------|--------------|
| U  | 9.455708000  | 10.388735000 | 9.435439000  |
| Fe | 14.624482000 | 8.810847000  | 9.705612000  |
| P  | 14.337954000 | 6.801801000  | 8.674270000  |
| P  | 15.882688000 | 9.343305000  | 7.930955000  |
| P  | 16.073258000 | 7.990356000  | 11.260093000 |
| P  | 14.974737000 | 10.771965000 | 10.794547000 |
| O  | 8.304329000  | 9.235858000  | 10.895579000 |
| O  | 8.458828000  | 10.174638000 | 7.476488000  |
| O  | 9.861602000  | 12.497440000 | 9.990810000  |
| N  | 11.800531000 | 9.474603000  | 9.520546000  |
| N  | 12.915459000 | 9.157552000  | 9.640937000  |
| C  | 12.625891000 | 6.455728000  | 8.000463000  |
| H  | 11.955100000 | 6.427642000  | 8.865046000  |
| H  | 12.349108000 | 7.354071000  | 7.440696000  |
| C  | 12.461133000 | 5.206474000  | 7.138204000  |
| H  | 13.107479000 | 5.224636000  | 6.254935000  |
| H  | 11.429618000 | 5.125357000  | 6.779680000  |
| H  | 12.681723000 | 4.287801000  | 7.689724000  |
| C  | 14.729361000 | 5.125842000  | 9.449683000  |
| H  | 14.829719000 | 4.399946000  | 8.634814000  |
| H  | 15.717433000 | 5.208130000  | 9.913603000  |
| C  | 13.696110000 | 4.639690000  | 10.463004000 |

|   |              |              |              |
|---|--------------|--------------|--------------|
| H | 12.746257000 | 4.390532000  | 9.982305000  |
| H | 13.484331000 | 5.393988000  | 11.224610000 |
| H | 14.048756000 | 3.736900000  | 10.973919000 |
| C | 15.376631000 | 6.713303000  | 7.086192000  |
| H | 15.787587000 | 5.705689000  | 6.963637000  |
| H | 14.678714000 | 6.873454000  | 6.259043000  |
| C | 16.468250000 | 7.776198000  | 7.061784000  |
| H | 16.788275000 | 7.992477000  | 6.036677000  |
| H | 17.351322000 | 7.441505000  | 7.617362000  |
| C | 17.517130000 | 10.289638000 | 8.044379000  |
| H | 17.271376000 | 11.268942000 | 8.470890000  |
| H | 18.099508000 | 9.762907000  | 8.808687000  |
| C | 18.357252000 | 10.467676000 | 6.780429000  |
| H | 17.838845000 | 11.058618000 | 6.020292000  |
| H | 18.629495000 | 9.508099000  | 6.330567000  |
| H | 19.290786000 | 10.992201000 | 7.013969000  |
| C | 15.088254000 | 10.305074000 | 6.512687000  |
| H | 14.985145000 | 11.335876000 | 6.871861000  |
| H | 15.788218000 | 10.331374000 | 5.669854000  |
| C | 15.622066000 | 6.751581000  | 12.612812000 |
| H | 15.548191000 | 5.766380000  | 12.142538000 |
| H | 16.458695000 | 6.702806000  | 13.318770000 |
| C | 14.327059000 | 7.089683000  | 13.339586000 |
| H | 13.506955000 | 7.243597000  | 12.631583000 |
| H | 14.419488000 | 8.005101000  | 13.933505000 |
| H | 14.043391000 | 6.287408000  | 14.029228000 |
| C | 17.709350000 | 7.233844000  | 10.665859000 |
| H | 17.452917000 | 6.530261000  | 9.866423000  |
| H | 18.228019000 | 8.065109000  | 10.174340000 |
| C | 18.632898000 | 6.561267000  | 11.679198000 |
| H | 19.577852000 | 6.273405000  | 11.204512000 |
| H | 18.189434000 | 5.652591000  | 12.096122000 |
| H | 18.882256000 | 7.221955000  | 12.516149000 |
| C | 16.733010000 | 9.370148000  | 12.375104000 |
| H | 16.115911000 | 9.369754000  | 13.279473000 |
| H | 17.758353000 | 9.147158000  | 12.688835000 |
| C | 16.628989000 | 10.712701000 | 11.669597000 |
| H | 17.400263000 | 10.811139000 | 10.899248000 |
| H | 16.745325000 | 11.552784000 | 12.361291000 |
| C | 14.977324000 | 12.438044000 | 9.919954000  |
| H | 15.144108000 | 12.231111000 | 8.859193000  |
| H | 13.952065000 | 12.815652000 | 10.000951000 |
| C | 15.964134000 | 13.498036000 | 10.408237000 |
| H | 15.837223000 | 14.420421000 | 9.831141000  |
| H | 17.004802000 | 13.179988000 | 10.288419000 |
| H | 15.810889000 | 13.750824000 | 11.460195000 |
| C | 13.766069000 | 11.047744000 | 12.198327000 |
| H | 12.781950000 | 11.081506000 | 11.719471000 |
| H | 13.780616000 | 10.116083000 | 12.773334000 |
| C | 13.955921000 | 12.259893000 | 13.105056000 |
| H | 13.811368000 | 13.199225000 | 12.565064000 |
| H | 14.944057000 | 12.276854000 | 13.577716000 |
| H | 13.212934000 | 12.242549000 | 13.909461000 |
| C | 7.587116000  | 8.573112000  | 11.832462000 |
| C | 8.254890000  | 7.730800000  | 12.773685000 |
| C | 7.490958000  | 7.093934000  | 13.756849000 |
| H | 7.980183000  | 6.459498000  | 14.485951000 |
| C | 6.115404000  | 7.243253000  | 13.835032000 |
| H | 5.548635000  | 6.738823000  | 14.612799000 |
| C | 5.472750000  | 8.035785000  | 12.896770000 |
| H | 4.395487000  | 8.132096000  | 12.957365000 |
| C | 6.165342000  | 8.706265000  | 11.883955000 |
| C | 9.773306000  | 7.481172000  | 12.738076000 |
| C | 10.545122000 | 8.791358000  | 12.969832000 |
| H | 10.300719000 | 9.547720000  | 12.223780000 |
| H | 11.624834000 | 8.612882000  | 12.929425000 |
| H | 10.301934000 | 9.206954000  | 13.953446000 |
| C | 10.166356000 | 6.835580000  | 11.396704000 |
| H | 9.700253000  | 5.848777000  | 11.300024000 |
| H | 11.253930000 | 6.711267000  | 11.337264000 |



|   |              |              |              |
|---|--------------|--------------|--------------|
| H | 9.845419000  | 7.439883000  | 10.548649000 |
| C | 10.235873000 | 6.508085000  | 13.837848000 |
| H | 10.042991000 | 6.896371000  | 14.843569000 |
| H | 11.316843000 | 6.357937000  | 13.747136000 |
| H | 9.759810000  | 5.525909000  | 13.748898000 |
| C | 5.366003000  | 9.542467000  | 10.868940000 |
| C | 5.576131000  | 8.988519000  | 9.449382000  |
| H | 5.186574000  | 7.967063000  | 9.381434000  |
| H | 6.629297000  | 8.958504000  | 9.172866000  |
| H | 5.049908000  | 9.599044000  | 8.707894000  |
| C | 3.849262000  | 9.503355000  | 11.130745000 |
| H | 3.344366000  | 10.104883000 | 10.367203000 |
| H | 3.582490000  | 9.922001000  | 12.107297000 |
| H | 3.444451000  | 8.487943000  | 11.065949000 |
| C | 5.777194000  | 11.020068000 | 10.963172000 |
| H | 6.840627000  | 11.166436000 | 10.766447000 |
| H | 5.580528000  | 11.406860000 | 11.968553000 |
| H | 5.209109000  | 11.626691000 | 10.250116000 |
| C | 7.481278000  | 9.828318000  | 6.606746000  |
| C | 7.381340000  | 8.482580000  | 6.140550000  |
| C | 6.233574000  | 8.108636000  | 5.434077000  |
| H | 6.117119000  | 7.081262000  | 5.109746000  |
| C | 5.231220000  | 9.015149000  | 5.125150000  |
| H | 4.338072000  | 8.693378000  | 4.596972000  |
| C | 5.419818000  | 10.352365000 | 5.443080000  |
| H | 4.670688000  | 11.067102000 | 5.123879000  |
| C | 6.544038000  | 10.801889000 | 6.143254000  |
| C | 8.512369000  | 7.454205000  | 6.326305000  |
| C | 9.833674000  | 8.057141000  | 5.809776000  |
| H | 9.736678000  | 8.326277000  | 4.752473000  |
| H | 10.645301000 | 7.326097000  | 5.894840000  |
| H | 10.111899000 | 8.958071000  | 6.358993000  |
| C | 8.636735000  | 7.009959000  | 7.791879000  |
| H | 8.814421000  | 7.850966000  | 8.466198000  |
| H | 9.460075000  | 6.296987000  | 7.916011000  |
| H | 7.715348000  | 6.526021000  | 8.130691000  |
| C | 8.272167000  | 6.174008000  | 5.504066000  |
| H | 7.396062000  | 5.614444000  | 5.847655000  |
| H | 9.138690000  | 5.511754000  | 5.610937000  |
| H | 8.148976000  | 6.389000000  | 4.437589000  |
| C | 6.781054000  | 12.317922000 | 6.277883000  |
| C | 6.777829000  | 12.795372000 | 7.738190000  |
| H | 5.836047000  | 12.532768000 | 8.228499000  |
| H | 6.889153000  | 13.884978000 | 7.784539000  |
| H | 7.595885000  | 12.362136000 | 8.315403000  |
| C | 8.121051000  | 12.650603000 | 5.594468000  |
| H | 8.951818000  | 12.127996000 | 6.072199000  |
| H | 8.315996000  | 13.727354000 | 5.636872000  |
| H | 8.090817000  | 12.352531000 | 4.540791000  |
| C | 5.700418000  | 13.143487000 | 5.555360000  |
| H | 5.638085000  | 12.900407000 | 4.489681000  |
| H | 5.953211000  | 14.206157000 | 5.636628000  |
| H | 4.707927000  | 13.010174000 | 5.999595000  |
| C | 10.547293000 | 13.544143000 | 10.488651000 |
| C | 11.545144000 | 14.193045000 | 9.693631000  |
| C | 12.384216000 | 15.123315000 | 10.319539000 |
| H | 13.169792000 | 15.603367000 | 9.747980000  |
| C | 12.233284000 | 15.477301000 | 11.653204000 |
| H | 12.907265000 | 16.194033000 | 12.114442000 |
| C | 11.158272000 | 14.960362000 | 12.362661000 |
| H | 10.995977000 | 15.307465000 | 13.376264000 |
| C | 10.277911000 | 14.025699000 | 11.808566000 |
| C | 9.012327000  | 13.631881000 | 12.595319000 |
| C | 9.023623000  | 12.152147000 | 13.007762000 |
| H | 9.018965000  | 11.480190000 | 12.149768000 |
| H | 8.139077000  | 11.913565000 | 13.609192000 |
| H | 9.910334000  | 11.926102000 | 13.609452000 |
| C | 7.776252000  | 13.954365000 | 11.732762000 |
| H | 7.727274000  | 15.029585000 | 11.528604000 |
| H | 6.858173000  | 13.667700000 | 12.257539000 |

|   |             |             |             |
|---|-------------|-------------|-------------|
| H | 7.80466000  | 13.43038800 | 10.77671200 |
| C | 8.86129400  | 14.44241600 | 13.89582400 |
| H | 9.65924700  | 14.23000200 | 14.61604500 |
| H | 7.91404200  | 14.17016700 | 14.37338000 |
| H | 8.83944500  | 15.52152700 | 13.71090500 |
| C | 11.61507800 | 14.05022800 | 8.15815500  |
| C | 10.33232300 | 14.68480200 | 7.58735900  |
| H | 9.44447400  | 14.17234200 | 7.96320100  |
| H | 10.32680200 | 14.62630000 | 6.49300500  |
| H | 10.26728700 | 15.73955700 | 7.87430500  |
| C | 12.80468500 | 14.82019400 | 7.55368900  |
| H | 12.75529900 | 15.89339400 | 7.76098300  |
| H | 12.78736200 | 14.70233200 | 6.46508400  |
| H | 13.76961600 | 14.44367400 | 7.91165800  |
| C | 11.73738200 | 12.59921700 | 7.65652400  |
| H | 12.48547200 | 12.02992500 | 8.21518500  |
| H | 12.02650700 | 12.59058300 | 6.59938100  |
| H | 10.78191600 | 12.07318600 | 7.71677900  |
| C | 13.72874900 | 9.78304000  | 6.06139000  |
| H | 13.28301700 | 10.45707400 | 5.32226200  |
| H | 13.03633300 | 9.70353500  | 6.90337600  |
| H | 13.80670100 | 8.79889100  | 5.58937800  |

**N2U(HMDS)3, S=3/2, small core**

|    |             |             |             |
|----|-------------|-------------|-------------|
| U  | 8.50422800  | 15.16203100 | 2.54027800  |
| Si | 9.23999200  | 11.79134700 | 3.02170400  |
| Si | 11.02103400 | 13.67854900 | 4.63270600  |
| Si | 10.16020800 | 18.15697400 | 2.04446400  |
| Si | 8.79479900  | 18.05700900 | 4.75046900  |
| Si | 5.40273000  | 15.99558200 | 1.67610100  |
| Si | 5.27864300  | 14.17121400 | 4.11509300  |
| N  | 9.15273700  | 14.22181800 | 0.36323700  |
| N  | 9.47913900  | 13.76264000 | -0.60669900 |
| N  | 9.65888100  | 13.45138500 | 3.50637300  |
| N  | 9.19612600  | 17.25143400 | 3.21947200  |
| N  | 6.24725700  | 15.02157600 | 2.88662900  |
| C  | 8.82037400  | 10.67760600 | 4.50308500  |
| H  | 7.93479000  | 11.03681300 | 5.03536300  |
| H  | 9.64011800  | 10.61069300 | 5.22430900  |
| H  | 8.60929400  | 9.66139700  | 4.14993100  |
| C  | 7.71138500  | 11.78356600 | 1.87586200  |
| H  | 8.00265100  | 11.81066700 | 0.82225800  |
| H  | 6.98615000  | 12.58479200 | 2.05376500  |
| H  | 7.17816400  | 10.83861200 | 2.03461400  |
| C  | 10.60040300 | 10.93680900 | 2.00501300  |
| H  | 11.45146600 | 10.61659500 | 2.60977000  |
| H  | 10.97454900 | 11.59334900 | 1.21271900  |
| H  | 10.17912500 | 10.04552900 | 1.52492100  |
| C  | 12.04282900 | 15.18755600 | 4.11141700  |
| H  | 11.42757000 | 16.08695400 | 4.02218000  |
| H  | 12.53114700 | 15.00218600 | 3.14806300  |
| H  | 12.82921600 | 15.38489700 | 4.84903700  |
| C  | 12.27440200 | 12.24984800 | 4.71298700  |
| H  | 12.79056800 | 12.10941100 | 3.75897600  |
| H  | 11.84375900 | 11.29186600 | 5.01657600  |
| H  | 13.03123800 | 12.51891700 | 5.45957500  |
| C  | 10.37122300 | 13.93596600 | 6.39704800  |
| H  | 9.80700300  | 13.06100200 | 6.73555100  |
| H  | 9.70720300  | 14.80321500 | 6.46399200  |
| H  | 11.19894000 | 14.09480300 | 7.09749200  |
| C  | 11.70477800 | 18.98991600 | 2.76714000  |
| H  | 12.34722600 | 18.27538700 | 3.28956500  |
| H  | 11.44917000 | 19.79324700 | 3.46495100  |
| H  | 12.28800000 | 19.43814000 | 1.95421600  |
| C  | 10.77939400 | 16.95347000 | 0.69704100  |
| H  | 10.00475400 | 16.63640700 | -0.00900300 |
| H  | 11.28800800 | 16.06612000 | 1.09149200  |
| H  | 11.52269900 | 17.49532300 | 0.10015600  |
| C  | 9.18063800  | 19.49822900 | 1.12057500  |
| H  | 8.91845100  | 20.33443900 | 1.77414600  |

|   |              |              |              |
|---|--------------|--------------|--------------|
| H | 8.250956000  | 19.106516000 | 0.696347000  |
| H | 9.783034000  | 19.896987000 | 0.295868000  |
| C | 10.259295000 | 18.150696000 | 5.958781000  |
| H | 11.079581000 | 18.769106000 | 5.584504000  |
| H | 10.662865000 | 17.158618000 | 6.182059000  |
| H | 9.917789000  | 18.589551000 | 6.903850000  |
| C | 7.439490000  | 17.077308000 | 5.634439000  |
| H | 7.786114000  | 16.081150000 | 5.926847000  |
| H | 6.549280000  | 16.959999000 | 5.011343000  |
| H | 7.150659000  | 17.598214000 | 6.554297000  |
| C | 8.156172000  | 19.833880000 | 4.524442000  |
| H | 7.313762000  | 19.884096000 | 3.828016000  |
| H | 8.935562000  | 20.512924000 | 4.164273000  |
| H | 7.813835000  | 20.217430000 | 5.492656000  |
| C | 6.596689000  | 16.339634000 | 0.215011000  |
| H | 6.838664000  | 15.440871000 | -0.360583000 |
| H | 7.523925000  | 16.871385000 | 0.469742000  |
| H | 6.066886000  | 17.016778000 | -0.465560000 |
| C | 3.910486000  | 15.132091000 | 0.882552000  |
| H | 3.096980000  | 14.970310000 | 1.596179000  |
| H | 4.186786000  | 14.162934000 | 0.455947000  |
| H | 3.516149000  | 15.757026000 | 0.072866000  |
| C | 4.839279000  | 17.693675000 | 2.305138000  |
| H | 5.688687000  | 18.276350000 | 2.674368000  |
| H | 4.112848000  | 17.605098000 | 3.117753000  |
| H | 4.367535000  | 18.261952000 | 1.495145000  |
| C | 4.418279000  | 12.613600000 | 3.443703000  |
| H | 5.129498000  | 11.829204000 | 3.172862000  |
| H | 3.798088000  | 12.823132000 | 2.568331000  |
| H | 3.763600000  | 12.210091000 | 4.225457000  |
| C | 3.891010000  | 15.254842000 | 4.838227000  |
| H | 3.125299000  | 15.507933000 | 4.097713000  |
| H | 4.274025000  | 16.186939000 | 5.264189000  |
| H | 3.393336000  | 14.702306000 | 5.643940000  |
| C | 6.372594000  | 13.620402000 | 5.566719000  |
| H | 6.438381000  | 14.399217000 | 6.330970000  |
| H | 7.389386000  | 13.361691000 | 5.254756000  |
| H | 5.934597000  | 12.732737000 | 6.037060000  |

**N2U(OAr)3, S=3/2, small core**

|   |              |              |              |
|---|--------------|--------------|--------------|
| U | 9.197775000  | 10.442773000 | 9.196825000  |
| O | 8.327090000  | 9.267835000  | 10.769730000 |
| O | 8.154436000  | 10.265439000 | 7.307424000  |
| O | 9.566440000  | 12.439580000 | 9.941690000  |
| N | 10.969386000 | 8.777169000  | 8.618373000  |
| N | 11.795106000 | 8.073262000  | 8.354135000  |
| C | 7.867327000  | 8.788776000  | 11.954995000 |
| C | 8.796623000  | 8.327031000  | 12.932108000 |
| C | 8.296296000  | 7.943604000  | 14.180132000 |
| H | 8.979791000  | 7.606271000  | 14.949929000 |
| C | 6.940026000  | 7.973599000  | 14.468286000 |
| H | 6.580834000  | 7.677163000  | 15.449710000 |
| C | 6.044720000  | 8.356398000  | 13.480552000 |
| H | 4.986233000  | 8.338681000  | 13.710132000 |
| C | 6.466287000  | 8.758407000  | 12.208890000 |
| C | 10.298310000 | 8.149094000  | 12.634617000 |
| C | 10.988278000 | 9.480371000  | 12.281638000 |
| H | 10.492579000 | 10.014027000 | 11.465659000 |
| H | 12.033451000 | 9.309236000  | 11.999507000 |
| H | 10.976099000 | 10.164553000 | 13.135527000 |
| C | 10.448855000 | 7.112842000  | 11.502692000 |
| H | 10.077621000 | 6.139291000  | 11.838775000 |
| H | 11.502070000 | 6.992454000  | 11.222063000 |
| H | 9.877975000  | 7.391646000  | 10.615923000 |
| C | 11.077120000 | 7.593607000  | 13.841168000 |
| H | 11.039778000 | 8.266038000  | 14.704614000 |
| H | 12.129873000 | 7.475048000  | 13.562576000 |
| H | 10.709344000 | 6.610467000  | 14.150680000 |
| C | 5.413267000  | 9.127191000  | 11.145689000 |
| C | 5.593251000  | 8.254124000  | 9.889944000  |

|   |              |              |              |
|---|--------------|--------------|--------------|
| H | 5.454786000  | 7.196377000  | 10.138636000 |
| H | 6.584139000  | 8.366649000  | 9.452415000  |
| H | 4.851893000  | 8.523527000  | 9.129351000  |
| C | 3.974937000  | 8.885959000  | 11.639002000 |
| H | 3.277293000  | 9.132967000  | 10.831718000 |
| H | 3.714819000  | 9.514467000  | 12.497259000 |
| H | 3.805234000  | 7.839087000  | 11.911156000 |
| C | 5.502701000  | 10.619962000 | 10.789168000 |
| H | 6.499404000  | 10.903846000 | 10.444189000 |
| H | 5.278078000  | 11.241795000 | 11.661257000 |
| H | 4.787816000  | 10.869112000 | 9.997775000  |
| C | 7.256424000  | 10.036361000 | 6.311350000  |
| C | 7.195586000  | 8.752538000  | 5.692257000  |
| C | 6.148531000  | 8.507839000  | 4.797616000  |
| H | 6.057422000  | 7.531396000  | 4.337420000  |
| C | 5.217200000  | 9.480687000  | 4.467833000  |
| H | 4.404860000  | 9.255149000  | 3.782791000  |
| C | 5.367092000  | 10.758969000 | 4.983507000  |
| H | 4.671522000  | 11.527019000 | 4.667941000  |
| C | 6.388282000  | 11.082612000 | 5.882589000  |
| C | 8.266154000  | 7.664364000  | 5.904946000  |
| C | 9.647046000  | 8.242325000  | 5.533272000  |
| H | 9.669567000  | 8.500245000  | 4.469266000  |
| H | 10.436681000 | 7.504235000  | 5.716772000  |
| H | 9.877642000  | 9.147950000  | 6.096482000  |
| C | 8.245172000  | 7.115999000  | 7.341791000  |
| H | 8.409160000  | 7.891836000  | 8.092027000  |
| H | 9.021479000  | 6.353133000  | 7.473588000  |
| H | 7.277403000  | 6.654683000  | 7.561242000  |
| C | 8.054016000  | 6.446493000  | 4.986210000  |
| H | 7.121562000  | 5.915472000  | 5.204705000  |
| H | 8.874558000  | 5.737691000  | 5.141926000  |
| H | 8.055467000  | 6.724063000  | 3.927266000  |
| C | 6.571399000  | 12.551278000 | 6.310234000  |
| C | 6.300686000  | 12.742255000 | 7.809498000  |
| H | 5.270966000  | 12.466152000 | 8.056325000  |
| H | 6.454079000  | 13.787146000 | 8.100268000  |
| H | 6.958767000  | 12.128906000 | 8.427662000  |
| C | 7.995463000  | 13.010070000 | 5.944177000  |
| H | 8.755833000  | 12.385482000 | 6.415482000  |
| H | 8.155782000  | 14.048085000 | 6.257050000  |
| H | 8.144437000  | 12.956890000 | 4.860469000  |
| C | 5.606099000  | 13.500449000 | 5.576562000  |
| H | 5.724099000  | 13.447828000 | 4.489469000  |
| H | 5.820252000  | 14.530154000 | 5.882300000  |
| H | 4.557591000  | 13.300490000 | 5.821526000  |
| C | 10.323593000 | 13.357582000 | 10.598796000 |
| C | 11.601929000 | 13.707666000 | 10.077631000 |
| C | 12.411933000 | 14.564724000 | 10.829038000 |
| H | 13.399384000 | 14.825582000 | 10.468203000 |
| C | 11.985170000 | 15.102695000 | 12.033392000 |
| H | 12.635797000 | 15.760343000 | 12.602725000 |
| C | 10.706495000 | 14.815041000 | 12.487409000 |
| H | 10.373736000 | 15.273973000 | 13.410451000 |
| C | 9.841599000  | 13.959380000 | 11.797415000 |
| C | 8.422563000  | 13.723461000 | 12.348016000 |
| C | 8.269689000  | 12.270929000 | 12.829365000 |
| H | 8.432200000  | 11.548738000 | 12.029589000 |
| H | 7.264883000  | 12.100631000 | 13.231107000 |
| H | 8.987966000  | 12.053355000 | 13.626592000 |
| C | 7.375989000  | 14.064373000 | 11.270608000 |
| H | 7.440490000  | 15.124027000 | 10.999373000 |
| H | 6.365088000  | 13.875314000 | 11.649692000 |
| H | 7.520837000  | 13.477034000 | 10.364902000 |
| C | 8.109404000  | 14.622382000 | 13.557982000 |
| H | 8.748694000  | 14.403054000 | 14.419735000 |
| H | 7.074861000  | 14.444934000 | 13.870211000 |
| H | 8.203622000  | 15.686603000 | 13.317213000 |
| C | 12.072459000 | 13.264918000 | 8.680263000  |
| C | 11.226690000 | 14.011470000 | 7.629910000  |

|   |              |              |             |
|---|--------------|--------------|-------------|
| H | 10.162140000 | 13.819147000 | 7.779369000 |
| H | 11.496624000 | 13.699201000 | 6.613543000 |
| H | 11.390369000 | 15.090635000 | 7.708544000 |
| C | 13.549616000 | 13.616339000 | 8.422910000 |
| H | 13.726736000 | 14.694843000 | 8.456183000 |
| H | 13.830660000 | 13.276704000 | 7.420440000 |
| H | 14.219827000 | 13.133267000 | 9.142288000 |
| C | 11.941126000 | 11.737398000 | 8.459421000 |
| H | 11.977127000 | 11.185296000 | 9.406729000 |
| H | 12.755074000 | 11.347721000 | 7.839181000 |
| H | 11.027466000 | 11.507387000 | 7.885848000 |

**A, S=0, small core**

|    |              |              |              |
|----|--------------|--------------|--------------|
| Fe | 11.747085000 | 0.497067000  | 13.999779000 |
| P  | 10.555561000 | -0.631941000 | 15.512589000 |
| P  | 12.218418000 | -1.532908000 | 13.130311000 |
| P  | 10.868599000 | 1.342669000  | 12.139357000 |
| P  | 11.392605000 | 2.551816000  | 14.878953000 |
| C  | 10.570605000 | -2.489787000 | 15.148117000 |
| C  | 11.853617000 | -2.853666000 | 14.418580000 |
| C  | 10.294302000 | 3.128463000  | 12.395917000 |
| C  | 11.133762000 | 3.784183000  | 13.479684000 |
| C  | 8.698221000  | -0.407570000 | 15.848035000 |
| C  | 7.962728000  | -1.458049000 | 16.679206000 |
| C  | 11.161588000 | -0.620957000 | 17.309572000 |
| C  | 12.583838000 | -1.142143000 | 17.490747000 |
| C  | 13.998291000 | -1.985305000 | 12.736233000 |
| C  | 14.586736000 | -1.275533000 | 11.521503000 |
| C  | 11.312018000 | -2.209994000 | 11.619992000 |
| C  | 11.651754000 | -3.617734000 | 11.136361000 |
| C  | 11.993733000 | 1.573980000  | 10.627575000 |
| C  | 13.212629000 | 2.456525000  | 10.874589000 |
| C  | 9.365750000  | 0.742098000  | 11.140712000 |
| C  | 8.174162000  | 0.311267000  | 11.983288000 |
| C  | 12.791639000 | 3.417400000  | 15.784944000 |
| C  | 13.125641000 | 2.830223000  | 17.152153000 |
| C  | 9.922491000  | 2.949580000  | 15.995399000 |
| C  | 9.771419000  | 4.375949000  | 16.518925000 |
| N  | 13.478418000 | 0.726179000  | 14.284176000 |
| N  | 14.592770000 | 0.870907000  | 14.464783000 |
| H  | 9.700277000  | -2.691789000 | 14.511667000 |
| H  | 10.441584000 | -3.069059000 | 16.069241000 |
| H  | 12.708807000 | -2.837183000 | 15.102333000 |
| H  | 11.812427000 | -3.852906000 | 13.971159000 |
| H  | 9.242309000  | 3.081313000  | 12.701367000 |
| H  | 10.333709000 | 3.678432000  | 11.447886000 |
| H  | 12.136652000 | 4.018157000  | 13.107558000 |
| H  | 10.694423000 | 4.718928000  | 13.845026000 |
| H  | 8.243807000  | -0.321856000 | 14.855982000 |
| H  | 8.590377000  | 0.576979000  | 16.313534000 |
| H  | 6.904558000  | -1.190753000 | 16.785623000 |
| H  | 7.999368000  | -2.448532000 | 16.215564000 |
| H  | 8.371875000  | -1.551171000 | 17.689995000 |
| H  | 10.466778000 | -1.186931000 | 17.940950000 |
| H  | 11.107644000 | 0.425614000  | 17.631197000 |
| H  | 12.945647000 | -0.953608000 | 18.507999000 |
| H  | 12.638067000 | -2.223657000 | 17.326530000 |
| H  | 13.273569000 | -0.661594000 | 16.789972000 |
| H  | 14.056679000 | -3.073973000 | 12.621431000 |
| H  | 14.569413000 | -1.724702000 | 13.633040000 |
| H  | 15.634649000 | -1.560668000 | 11.377146000 |
| H  | 14.050680000 | -1.526878000 | 10.599597000 |
| H  | 14.553896000 | -0.190379000 | 11.647640000 |
| H  | 11.489589000 | -1.488193000 | 10.815907000 |
| H  | 10.246879000 | -2.131827000 | 11.864996000 |
| H  | 11.034966000 | -3.883324000 | 10.270034000 |
| H  | 12.697859000 | -3.703376000 | 10.827533000 |
| H  | 11.469405000 | -4.375802000 | 11.904221000 |
| H  | 11.395042000 | 1.965447000  | 9.794520000  |
| H  | 12.318931000 | 0.566967000  | 10.341436000 |

|   |              |              |              |
|---|--------------|--------------|--------------|
| H | 13.907700000 | 2.415501000  | 10.028174000 |
| H | 12.928278000 | 3.506031000  | 11.005312000 |
| H | 13.752783000 | 2.141457000  | 11.772905000 |
| H | 9.705173000  | -0.089944000 | 10.514781000 |
| H | 9.085178000  | 1.553191000  | 10.456354000 |
| H | 7.334152000  | -0.004375000 | 11.353592000 |
| H | 8.443751000  | -0.523712000 | 12.636958000 |
| H | 7.815843000  | 1.122402000  | 12.626956000 |
| H | 12.540801000 | 4.481518000  | 15.864483000 |
| H | 13.660037000 | 3.339150000  | 15.123212000 |
| H | 13.971012000 | 3.359835000  | 17.605050000 |
| H | 12.282848000 | 2.905335000  | 17.848229000 |
| H | 13.402093000 | 1.776229000  | 17.068169000 |
| H | 9.981247000  | 2.250853000  | 16.836509000 |
| H | 9.038680000  | 2.655470000  | 15.418126000 |
| H | 8.857052000  | 4.468227000  | 17.116377000 |
| H | 10.608280000 | 4.667530000  | 17.160377000 |
| H | 9.701810000  | 5.110376000  | 15.710602000 |

**1-Ce, S=1/2, small core+solv+disp**

|    |              |              |              |
|----|--------------|--------------|--------------|
| Ce | 2.202497000  | 0.026262000  | -0.100887000 |
| Fe | -3.178073000 | -0.137835000 | 0.111659000  |
| P  | -3.315865000 | -2.349934000 | 0.268257000  |
| P  | -4.529431000 | -0.391162000 | -1.592146000 |
| P  | -3.117501000 | 2.075890000  | -0.050263000 |
| P  | -4.172421000 | 0.218218000  | 2.019699000  |
| Si | 2.522004000  | -1.672736000 | 2.946433000  |
| Si | 5.020386000  | -0.251552000 | 2.078474000  |
| Si | 3.829862000  | -2.726800000 | -1.824907000 |
| Si | 1.881130000  | -1.085564000 | -3.383365000 |
| Si | 3.365400000  | 3.166604000  | -1.450613000 |
| Si | 1.944938000  | 3.243522000  | 1.194805000  |
| N  | -0.325575000 | -0.211945000 | -0.174752000 |
| N  | -1.477116000 | -0.193737000 | -0.053351000 |
| N  | 3.364865000  | -0.678126000 | 1.816330000  |
| N  | 2.682544000  | -1.431260000 | -1.891971000 |
| N  | 2.495424000  | 2.373771000  | -0.188510000 |
| C  | 0.996576000  | -2.399638000 | 2.097130000  |
| H  | 0.260127000  | -1.643085000 | 1.804892000  |
| H  | 0.498895000  | -3.081078000 | 2.793293000  |
| H  | 1.262215000  | -2.980141000 | 1.206645000  |
| C  | 1.903800000  | -0.754294000 | 4.481724000  |
| H  | 1.215831000  | 0.059782000  | 4.235178000  |
| H  | 2.735415000  | -0.320572000 | 5.047292000  |
| H  | 1.375211000  | -1.445038000 | 5.150919000  |
| C  | 3.519186000  | -3.137721000 | 3.608904000  |
| H  | 4.372212000  | -2.809948000 | 4.213133000  |
| H  | 3.899291000  | -3.775117000 | 2.804749000  |
| H  | 2.884717000  | -3.757404000 | 4.255150000  |
| C  | 5.333544000  | 0.433535000  | 3.813784000  |
| H  | 5.239305000  | -0.351665000 | 4.571191000  |
| H  | 4.630292000  | 1.231896000  | 4.076656000  |
| H  | 6.348164000  | 0.844188000  | 3.895515000  |
| C  | 6.240165000  | -1.680699000 | 1.849331000  |
| H  | 6.200301000  | -2.083908000 | 0.832521000  |
| H  | 6.062363000  | -2.509189000 | 2.541206000  |
| H  | 7.263194000  | -1.321042000 | 2.019711000  |
| C  | 5.537158000  | 1.041964000  | 0.806042000  |
| H  | 4.866184000  | 1.903214000  | 0.800180000  |
| H  | 5.551796000  | 0.621303000  | -0.206196000 |
| H  | 6.554226000  | 1.396312000  | 1.011643000  |
| C  | 3.828376000  | -3.547944000 | -0.128605000 |
| H  | 2.912747000  | -4.132897000 | 0.017367000  |
| H  | 3.889535000  | -2.805086000 | 0.670140000  |
| H  | 4.677668000  | -4.233599000 | -0.023462000 |
| C  | 3.501066000  | -4.143968000 | -3.039580000 |
| H  | 3.499287000  | -3.840820000 | -4.090898000 |
| H  | 2.542388000  | -4.629978000 | -2.826766000 |
| H  | 4.283742000  | -4.904262000 | -2.921352000 |
| C  | 5.570260000  | -2.075162000 | -2.174973000 |

|   |              |              |              |
|---|--------------|--------------|--------------|
| H | 5.846173000  | -1.282934000 | -1.469987000 |
| H | 5.626658000  | -1.645199000 | -3.181575000 |
| H | 6.331111000  | -2.861887000 | -2.102937000 |
| C | 3.043598000  | -0.928191000 | -4.868308000 |
| H | 3.575343000  | -1.858109000 | -5.092895000 |
| H | 3.794658000  | -0.150941000 | -4.691694000 |
| H | 2.480932000  | -0.647053000 | -5.767517000 |
| C | 1.001189000  | 0.581979000  | -3.252826000 |
| H | 1.709329000  | 1.407164000  | -3.147270000 |
| H | 0.294617000  | 0.623612000  | -2.417223000 |
| H | 0.427348000  | 0.769027000  | -4.167160000 |
| C | 0.546816000  | -2.356437000 | -3.807412000 |
| H | -0.121113000 | -2.488061000 | -2.949533000 |
| H | 0.969201000  | -3.335712000 | -4.052701000 |
| H | -0.056389000 | -2.030184000 | -4.662937000 |
| C | 4.307416000  | 1.878260000  | -2.480418000 |
| H | 3.914225000  | 0.859026000  | -2.386606000 |
| H | 5.361132000  | 1.844978000  | -2.184023000 |
| H | 4.275799000  | 2.133000000  | -3.546115000 |
| C | 4.656010000  | 4.412018000  | -0.844797000 |
| H | 5.388408000  | 3.948155000  | -0.176246000 |
| H | 4.201600000  | 5.257218000  | -0.316105000 |
| H | 5.205058000  | 4.822696000  | -1.701838000 |
| C | 2.247009000  | 4.149838000  | -2.621064000 |
| H | 1.720457000  | 4.946273000  | -2.084346000 |
| H | 1.493549000  | 3.517777000  | -3.100547000 |
| H | 2.837326000  | 4.622428000  | -3.416321000 |
| C | 1.068530000  | 4.867959000  | 0.776527000  |
| H | 0.337909000  | 4.744877000  | -0.026933000 |
| H | 1.788100000  | 5.630086000  | 0.456100000  |
| H | 0.544174000  | 5.265366000  | 1.654660000  |
| C | 0.756707000  | 2.138436000  | 2.172286000  |
| H | 1.286843000  | 1.244997000  | 2.524734000  |
| H | -0.119710000 | 1.811512000  | 1.606131000  |
| H | 0.407273000  | 2.662342000  | 3.069251000  |
| C | 3.313305000  | 3.685192000  | 2.421241000  |
| H | 4.064552000  | 4.350980000  | 1.985060000  |
| H | 3.829688000  | 2.784996000  | 2.767574000  |
| H | 2.896209000  | 4.187926000  | 3.303044000  |
| C | -1.995600000 | -4.681930000 | -0.822924000 |
| H | -2.826718000 | -4.937427000 | -1.487778000 |
| H | -2.128933000 | -5.242302000 | 0.107761000  |
| H | -1.077344000 | -5.046458000 | -1.295920000 |
| C | -1.901496000 | -3.181772000 | -0.582967000 |
| H | -1.781059000 | -2.642085000 | -1.527773000 |
| H | -1.010218000 | -2.935744000 | 0.003664000  |
| C | -3.523175000 | -3.378069000 | 1.797680000  |
| H | -4.324801000 | -2.917219000 | 2.384749000  |
| H | -3.901555000 | -4.357805000 | 1.482288000  |
| C | -2.261180000 | -3.548069000 | 2.630129000  |
| H | -2.481238000 | -4.054808000 | 3.575939000  |
| H | -1.795785000 | -2.588860000 | 2.861764000  |
| H | -1.517685000 | -4.147979000 | 2.098988000  |
| C | -4.794857000 | -2.950449000 | -0.668970000 |
| H | -4.773737000 | -4.036771000 | -0.805973000 |
| H | -5.669146000 | -2.713598000 | -0.049916000 |
| C | -4.839660000 | -2.188908000 | -1.979975000 |
| H | -5.787617000 | -2.321432000 | -2.511838000 |
| H | -4.041835000 | -2.539722000 | -2.641451000 |
| C | -3.962783000 | 0.197685000  | -3.260569000 |
| H | -4.706926000 | -0.055872000 | -4.023722000 |
| H | -3.899698000 | 1.289842000  | -3.224067000 |
| C | -2.602013000 | -0.390821000 | -3.621769000 |
| H | -2.676342000 | -1.453097000 | -3.871922000 |
| H | -1.900416000 | -0.299491000 | -2.787650000 |
| H | -2.172513000 | 0.116203000  | -4.491465000 |
| C | -6.304685000 | 0.178109000  | -1.500339000 |
| H | -6.772368000 | -0.539165000 | -0.813767000 |
| H | -6.320211000 | 1.136730000  | -0.978868000 |
| C | -7.097753000 | 0.270461000  | -2.798438000 |

|   |              |              |              |
|---|--------------|--------------|--------------|
| H | -8.150859000 | 0.493874000  | -2.592993000 |
| H | -7.069239000 | -0.664697000 | -3.367698000 |
| H | -6.715992000 | 1.064658000  | -3.447234000 |
| C | -1.644081000 | 2.908029000  | -0.779583000 |
| H | -1.629474000 | 3.940212000  | -0.415412000 |
| H | -0.754623000 | 2.418075000  | -0.375044000 |
| C | -1.604968000 | 2.868190000  | -2.300654000 |
| H | -2.457243000 | 3.389300000  | -2.748295000 |
| H | -1.609585000 | 1.840776000  | -2.665391000 |
| H | -0.693341000 | 3.346340000  | -2.668660000 |
| C | -4.510633000 | 3.040343000  | -0.813519000 |
| H | -4.660676000 | 2.665101000  | -1.829958000 |
| H | -5.406038000 | 2.754535000  | -0.252097000 |
| C | -4.374734000 | 4.559178000  | -0.829236000 |
| H | -5.269789000 | 5.013357000  | -1.268495000 |
| H | -3.516713000 | 4.890740000  | -1.420163000 |
| H | -4.263355000 | 4.971449000  | 0.177829000  |
| C | -3.157559000 | 2.755933000  | 1.670025000  |
| H | -2.190557000 | 2.517603000  | 2.121851000  |
| H | -3.268813000 | 3.845073000  | 1.681423000  |
| C | -4.289752000 | 2.044806000  | 2.399970000  |
| H | -5.260340000 | 2.405127000  | 2.038329000  |
| H | -4.258145000 | 2.224130000  | 3.479429000  |
| C | -5.925441000 | -0.332815000 | 2.295057000  |
| H | -6.497227000 | 0.160291000  | 1.500207000  |
| H | -5.952696000 | -1.403326000 | 2.057610000  |
| C | -6.558566000 | -0.070305000 | 3.656912000  |
| H | -7.615473000 | -0.360204000 | 3.656629000  |
| H | -6.510748000 | 0.989548000  | 3.927757000  |
| H | -6.065217000 | -0.639256000 | 4.450345000  |
| C | -3.355935000 | -0.368870000 | 3.585832000  |
| H | -3.886531000 | 0.058829000  | 4.443889000  |
| H | -3.488282000 | -1.451999000 | 3.643794000  |
| C | -1.875951000 | -0.010929000 | 3.641372000  |
| H | -1.730344000 | 1.065583000  | 3.769641000  |
| H | -1.369246000 | -0.298202000 | 2.715842000  |
| H | -1.377965000 | -0.510744000 | 4.478315000  |

**1-Sm, S=5/2, small core+solv+disp**

|    |              |              |              |
|----|--------------|--------------|--------------|
| Sm | 2.166689000  | 0.016221000  | -0.028398000 |
| Fe | -3.137832000 | -0.221755000 | -0.050152000 |
| P  | -3.076365000 | 1.894663000  | 0.656133000  |
| P  | -4.022788000 | -0.682772000 | 1.900783000  |
| P  | -3.209587000 | -2.297122000 | -0.843331000 |
| P  | -4.736961000 | 0.188209000  | -1.521075000 |
| Si | 1.641164000  | 2.430894000  | -2.496845000 |
| Si | 3.548214000  | 3.277135000  | -0.350673000 |
| Si | 2.251583000  | 0.819474000  | 3.290067000  |
| Si | 4.467523000  | -1.054023000 | 2.530972000  |
| Si | 3.973747000  | -1.504116000 | -2.673853000 |
| Si | 2.458475000  | -3.278550000 | -0.747311000 |
| N  | -0.257245000 | -0.298953000 | -0.036096000 |
| N  | -1.413517000 | -0.250273000 | -0.096751000 |
| N  | 2.466245000  | 2.102277000  | -1.015748000 |
| N  | 3.075989000  | -0.117220000 | 2.102072000  |
| N  | 2.954441000  | -1.720163000 | -1.292578000 |
| C  | 2.735593000  | 2.463858000  | -4.041895000 |
| H  | 3.481075000  | 3.263458000  | -4.010996000 |
| H  | 2.112012000  | 2.629392000  | -4.930029000 |
| H  | 3.268634000  | 1.520126000  | -4.186600000 |
| C  | 0.720309000  | 4.086819000  | -2.491843000 |
| H  | 0.114671000  | 4.210473000  | -1.589934000 |
| H  | 0.052479000  | 4.162826000  | -3.359338000 |
| H  | 1.414170000  | 4.933511000  | -2.540749000 |
| C  | 0.361094000  | 1.079490000  | -2.823097000 |
| H  | 0.779100000  | 0.070951000  | -2.722427000 |
| H  | -0.012798000 | 1.165601000  | -3.850165000 |
| H  | -0.493879000 | 1.143987000  | -2.146788000 |
| C  | 2.665538000  | 4.523952000  | 0.768494000  |
| H  | 1.949823000  | 5.116751000  | 0.187305000  |



|   |              |              |              |
|---|--------------|--------------|--------------|
| H | 3.379835000  | 5.223546000  | 1.220343000  |
| H | 2.116442000  | 4.042657000  | 1.583277000  |
| C | 4.467267000  | 4.311705000  | -1.644607000 |
| H | 5.065639000  | 3.676457000  | -2.306620000 |
| H | 5.156889000  | 4.998407000  | -1.137248000 |
| H | 3.802973000  | 4.919762000  | -2.267497000 |
| C | 4.910210000  | 2.428247000  | 0.642506000  |
| H | 4.512081000  | 1.703598000  | 1.358699000  |
| H | 5.508017000  | 3.162677000  | 1.195540000  |
| H | 5.587428000  | 1.896803000  | -0.035718000 |
| C | 3.217352000  | 2.282572000  | 4.001863000  |
| H | 3.640156000  | 2.911098000  | 3.212286000  |
| H | 4.039730000  | 1.967114000  | 4.649982000  |
| H | 2.548197000  | 2.911470000  | 4.602973000  |
| C | 1.645947000  | -0.210580000 | 4.755555000  |
| H | 1.112471000  | -1.102546000 | 4.411808000  |
| H | 0.968958000  | 0.363760000  | 5.400236000  |
| H | 2.483196000  | -0.545094000 | 5.378826000  |
| C | 0.730302000  | 1.591617000  | 2.469522000  |
| H | 0.996603000  | 2.164345000  | 1.570650000  |
| H | 0.254023000  | 2.299401000  | 3.156472000  |
| H | -0.012650000 | 0.840547000  | 2.187929000  |
| C | 5.571453000  | -0.220088000 | 3.824398000  |
| H | 5.883512000  | 0.778936000  | 3.501402000  |
| H | 6.479462000  | -0.818737000 | 3.971312000  |
| H | 5.084264000  | -0.125597000 | 4.801025000  |
| C | 5.567773000  | -1.315765000 | 1.021171000  |
| H | 4.994714000  | -1.662523000 | 0.156684000  |
| H | 6.353928000  | -2.051516000 | 1.228868000  |
| H | 6.060279000  | -0.375769000 | 0.749298000  |
| C | 4.016805000  | -2.740140000 | 3.264548000  |
| H | 3.431286000  | -2.618717000 | 4.183076000  |
| H | 4.920547000  | -3.306557000 | 3.522104000  |
| H | 3.427117000  | -3.354462000 | 2.579040000  |
| C | 4.984976000  | 0.077391000  | -2.469983000 |
| H | 4.365682000  | 0.928204000  | -2.168582000 |
| H | 5.493961000  | 0.346595000  | -3.403120000 |
| H | 5.755747000  | -0.071074000 | -1.705657000 |
| C | 5.232507000  | -2.895348000 | -2.918258000 |
| H | 5.861103000  | -3.026563000 | -2.031032000 |
| H | 5.893585000  | -2.650594000 | -3.759313000 |
| H | 4.760125000  | -3.857248000 | -3.145427000 |
| C | 2.974075000  | -1.415873000 | -4.277743000 |
| H | 2.442014000  | -2.360079000 | -4.444347000 |
| H | 3.620871000  | -1.243376000 | -5.146934000 |
| H | 2.225939000  | -0.618045000 | -4.256791000 |
| C | 3.850247000  | -4.409252000 | -0.142774000 |
| H | 4.517115000  | -3.907685000 | 0.563313000  |
| H | 4.462413000  | -4.778890000 | -0.970855000 |
| H | 3.425884000  | -5.284365000 | 0.365648000  |
| C | 1.546855000  | -4.264168000 | -2.081859000 |
| H | 0.774716000  | -3.663972000 | -2.571072000 |
| H | 1.071170000  | -5.162159000 | -1.668150000 |
| H | 2.244578000  | -4.596712000 | -2.859517000 |
| C | 1.282862000  | -3.063979000 | 0.726737000  |
| H | 1.698703000  | -2.427359000 | 1.518039000  |
| H | 1.090345000  | -4.041279000 | 1.183502000  |
| H | 0.317994000  | -2.641742000 | 0.438058000  |
| C | -1.589048000 | 2.870381000  | 0.178527000  |
| H | -0.733392000 | 2.203660000  | 0.294353000  |
| H | -1.687415000 | 3.040884000  | -0.898832000 |
| C | -1.337469000 | 4.183431000  | 0.908737000  |
| H | -0.365421000 | 4.593625000  | 0.619055000  |
| H | -1.317344000 | 4.048436000  | 1.993843000  |
| H | -2.095100000 | 4.935834000  | 0.671987000  |
| C | -4.449832000 | 3.108670000  | 0.304946000  |
| H | -4.135084000 | 3.657272000  | -0.589882000 |
| H | -5.333118000 | 2.536200000  | 0.017057000  |
| C | -4.836211000 | 4.088820000  | 1.408830000  |
| H | -5.605919000 | 4.776373000  | 1.040936000  |

|   |              |              |              |
|---|--------------|--------------|--------------|
| H | -5.251552000 | 3.573690000  | 2.280042000  |
| H | -3.992571000 | 4.692593000  | 1.750103000  |
| C | -3.050111000 | 1.833239000  | 2.503835000  |
| H | -2.064612000 | 1.452483000  | 2.783777000  |
| H | -3.165912000 | 2.819673000  | 2.960820000  |
| C | -4.147041000 | 0.866218000  | 2.934971000  |
| H | -5.134983000 | 1.305350000  | 2.747493000  |
| H | -4.088132000 | 0.636942000  | 4.004154000  |
| C | -5.734469000 | -1.382212000 | 2.095801000  |
| H | -6.398626000 | -0.628239000 | 1.661929000  |
| H | -5.797282000 | -2.251074000 | 1.429782000  |
| C | -6.204601000 | -1.749294000 | 3.499483000  |
| H | -6.112354000 | -0.905715000 | 4.191426000  |
| H | -5.636869000 | -2.586191000 | 3.915542000  |
| H | -7.259418000 | -2.045942000 | 3.485699000  |
| C | -3.070396000 | -1.779779000 | 3.060448000  |
| H | -3.540828000 | -1.730897000 | 4.048900000  |
| H | -3.193356000 | -2.807716000 | 2.708465000  |
| C | -1.591351000 | -1.430690000 | 3.166270000  |
| H | -1.115699000 | -1.378664000 | 2.184283000  |
| H | -1.060142000 | -2.180972000 | 3.760955000  |
| H | -1.442213000 | -0.465005000 | 3.657398000  |
| C | -1.775836000 | -2.777381000 | -1.905993000 |
| H | -0.893700000 | -2.718466000 | -1.263300000 |
| H | -1.888874000 | -3.829284000 | -2.194706000 |
| C | -1.575277000 | -1.889943000 | -3.126374000 |
| H | -0.601778000 | -2.080581000 | -3.588583000 |
| H | -2.340733000 | -2.073005000 | -3.886756000 |
| H | -1.610041000 | -0.835004000 | -2.845927000 |
| C | -3.373153000 | -3.838063000 | 0.177642000  |
| H | -4.152841000 | -3.653779000 | 0.924009000  |
| H | -3.757171000 | -4.624529000 | -0.484563000 |
| C | -2.080907000 | -4.302772000 | 0.839118000  |
| H | -2.276572000 | -5.121534000 | 1.539682000  |
| H | -1.365947000 | -4.668570000 | 0.097948000  |
| H | -1.590506000 | -3.499400000 | 1.392335000  |
| C | -4.671870000 | -2.524627000 | -1.960760000 |
| H | -4.511141000 | -3.374962000 | -2.633471000 |
| H | -5.521329000 | -2.776882000 | -1.313559000 |
| C | -4.940489000 | -1.228492000 | -2.705934000 |
| H | -5.935221000 | -1.215303000 | -3.164819000 |
| H | -4.208754000 | -1.083473000 | -3.505014000 |
| C | -4.637034000 | 1.588941000  | -2.739712000 |
| H | -5.371211000 | 1.406052000  | -3.532750000 |
| H | -4.945303000 | 2.508438000  | -2.235341000 |
| C | -3.241507000 | 1.748333000  | -3.324554000 |
| H | -2.500601000 | 1.878356000  | -2.532967000 |
| H | -3.190342000 | 2.613697000  | -3.994110000 |
| H | -2.941069000 | 0.866463000  | -3.898025000 |
| C | -6.498120000 | 0.325576000  | -0.918087000 |
| H | -6.750147000 | -0.692477000 | -0.597873000 |
| H | -6.488436000 | 0.925957000  | -0.002630000 |
| C | -7.549338000 | 0.854673000  | -1.886310000 |
| H | -7.375482000 | 1.905005000  | -2.137903000 |
| H | -8.549858000 | 0.784351000  | -1.444860000 |
| H | -7.567404000 | 0.287756000  | -2.822893000 |

**1-Dy, S=5/2, small core+solv+disp**

|    |              |              |              |
|----|--------------|--------------|--------------|
| Dy | -2.164320000 | 0.007886000  | -0.000649000 |
| Fe | 3.075920000  | -0.018687000 | -0.073475000 |
| P  | 3.045913000  | -2.150740000 | 0.524680000  |
| P  | 4.592642000  | 0.151973000  | 1.517608000  |
| P  | 3.987706000  | -0.305723000 | -2.030862000 |
| P  | 3.091813000  | 2.138829000  | -0.574308000 |
| Si | -4.327482000 | -0.959136000 | -2.620363000 |
| Si | -2.295530000 | -2.931974000 | -1.668005000 |
| Si | -3.667017000 | -1.957243000 | 2.495794000  |
| Si | -1.703933000 | 0.171267000  | 3.325935000  |
| Si | -2.246779000 | 2.855824000  | -1.781661000 |
| Si | -3.950389000 | 2.961170000  | 0.691345000  |

|   |              |              |              |
|---|--------------|--------------|--------------|
| N | 0.211567000  | -0.005969000 | -0.155899000 |
| N | 1.368381000  | 0.008340000  | -0.064777000 |
| N | -3.031011000 | -1.373022000 | -1.543753000 |
| N | -2.578179000 | -0.669942000 | 2.091194000  |
| N | -2.861671000 | 2.102018000  | -0.351696000 |
| C | -3.690544000 | -0.313009000 | -4.280410000 |
| H | -3.003773000 | 0.529673000  | -4.166218000 |
| H | -4.517674000 | 0.015695000  | -4.921743000 |
| H | -3.152694000 | -1.103516000 | -4.815998000 |
| C | -5.454889000 | 0.326967000  | -1.829448000 |
| H | -6.008882000 | -0.124905000 | -0.999280000 |
| H | -6.188928000 | 0.705620000  | -2.550645000 |
| H | -4.885837000 | 1.173547000  | -1.438435000 |
| C | -5.459499000 | -2.417180000 | -3.041599000 |
| H | -4.951825000 | -3.209262000 | -3.602015000 |
| H | -6.289209000 | -2.059860000 | -3.664822000 |
| H | -5.893427000 | -2.861988000 | -2.139726000 |
| C | -1.667134000 | -3.305870000 | -3.411962000 |
| H | -2.489022000 | -3.488178000 | -4.113115000 |
| H | -1.027008000 | -4.197091000 | -3.419069000 |
| H | -1.081237000 | -2.465112000 | -3.797153000 |
| C | -0.788319000 | -2.980632000 | -0.528277000 |
| H | 0.042615000  | -2.407672000 | -0.944902000 |
| H | -0.453725000 | -4.014285000 | -0.389696000 |
| H | -1.002574000 | -2.583367000 | 0.4711161000 |
| C | -3.383627000 | -4.389669000 | -1.150025000 |
| H | -3.825257000 | -4.240254000 | -0.160799000 |
| H | -2.778390000 | -5.304246000 | -1.107972000 |
| H | -4.201094000 | -4.570900000 | -1.853335000 |
| C | -2.786040000 | -3.628698000 | 2.594014000  |
| H | -2.318825000 | -3.913946000 | 1.647716000  |
| H | -3.485229000 | -4.427060000 | 2.872015000  |
| H | -1.997493000 | -3.600106000 | 3.354860000  |
| C | -4.527187000 | -1.735435000 | 4.166822000  |
| H | -3.833363000 | -1.759355000 | 5.013890000  |
| H | -5.246451000 | -2.551404000 | 4.312552000  |
| H | -5.084785000 | -0.793983000 | 4.209731000  |
| C | -5.057388000 | -2.058140000 | 1.224678000  |
| H | -5.728637000 | -1.199599000 | 1.337538000  |
| H | -5.655643000 | -2.966279000 | 1.365896000  |
| H | -4.673457000 | -2.056207000 | 0.200644000  |
| C | -0.644669000 | -0.982143000 | 4.385650000  |
| H | -1.258689000 | -1.646949000 | 5.003573000  |
| H | 0.004108000  | -0.410896000 | 5.061224000  |
| H | -0.006964000 | -1.607062000 | 3.754066000  |
| C | -0.521721000 | 1.415868000  | 2.535375000  |
| H | 0.359406000  | 0.930776000  | 2.112142000  |
| H | -0.182325000 | 2.113159000  | 3.309361000  |
| H | -0.983470000 | 2.020861000  | 1.745994000  |
| C | -2.774589000 | 1.170512000  | 4.524996000  |
| H | -3.482425000 | 1.819450000  | 4.001576000  |
| H | -2.132448000 | 1.811655000  | 5.142289000  |
| H | -3.348358000 | 0.533880000  | 5.204086000  |
| C | -0.950196000 | 1.719696000  | -2.570165000 |
| H | -0.023514000 | 1.694475000  | -1.993290000 |
| H | -0.709640000 | 2.089967000  | -3.573891000 |
| H | -1.291336000 | 0.684060000  | -2.690352000 |
| C | -1.404027000 | 4.511357000  | -1.419797000 |
| H | -2.143007000 | 5.288921000  | -1.195425000 |
| H | -0.819500000 | 4.856717000  | -2.281825000 |
| H | -0.731118000 | 4.438249000  | -0.560971000 |
| C | -3.529054000 | 3.214073000  | -3.125721000 |
| H | -3.020952000 | 3.463043000  | -4.065966000 |
| H | -4.165216000 | 4.064668000  | -2.864359000 |
| H | -4.182437000 | 2.359985000  | -3.319517000 |
| C | -3.045046000 | 4.055046000  | 1.941337000  |
| H | -2.418036000 | 3.479234000  | 2.626996000  |
| H | -3.761985000 | 4.623178000  | 2.547137000  |
| H | -2.399232000 | 4.778021000  | 1.430187000  |
| C | -5.128732000 | 4.114838000  | -0.238412000 |

|   |              |              |              |
|---|--------------|--------------|--------------|
| H | -4.614261000 | 4.947943000  | -0.729024000 |
| H | -5.843743000 | 4.548545000  | 0.472206000  |
| H | -5.705174000 | 3.575943000  | -0.997681000 |
| C | -5.059417000 | 1.756823000  | 1.627104000  |
| H | -5.791221000 | 1.310449000  | 0.945596000  |
| H | -5.616655000 | 2.276121000  | 2.416081000  |
| H | -4.486488000 | 0.947888000  | 2.088652000  |
| C | 3.982774000  | -4.222076000 | -1.209586000 |
| H | 3.705670000  | -4.977556000 | -1.952474000 |
| H | 4.591231000  | -4.717823000 | -0.447843000 |
| H | 4.617753000  | -3.487387000 | -1.711752000 |
| C | 2.732866000  | -3.592151000 | -0.603447000 |
| H | 2.180356000  | -4.351575000 | -0.041973000 |
| H | 2.057349000  | -3.240474000 | -1.386953000 |
| C | 1.809136000  | -3.733110000 | 2.617181000  |
| H | 1.024706000  | -3.738656000 | 3.381243000  |
| H | 2.760922000  | -3.915193000 | 3.126721000  |
| H | 1.616267000  | -4.582996000 | 1.955407000  |
| C | 1.804135000  | -2.406208000 | 1.871959000  |
| H | 1.963766000  | -1.571281000 | 2.560430000  |
| H | 0.828185000  | -2.221510000 | 1.416753000  |
| C | 4.630045000  | -2.593520000 | 1.365689000  |
| H | 4.593919000  | -3.584273000 | 1.830442000  |
| H | 5.411116000  | -2.612223000 | 0.598010000  |
| C | 4.895938000  | -1.483329000 | 2.370736000  |
| H | 5.910913000  | -1.527796000 | 2.778845000  |
| H | 4.204738000  | -1.566933000 | 3.214460000  |
| C | 6.359323000  | 0.547389000  | 1.060642000  |
| H | 6.705749000  | -0.361249000 | 0.553412000  |
| H | 6.337363000  | 1.323803000  | 0.293744000  |
| C | 7.324833000  | 0.936007000  | 2.173913000  |
| H | 7.337953000  | 0.201410000  | 2.986163000  |
| H | 7.069717000  | 1.907043000  | 2.608868000  |
| H | 8.347569000  | 1.009943000  | 1.787076000  |
| C | 4.294150000  | 1.240858000  | 2.994405000  |
| H | 5.146496000  | 1.181762000  | 3.679714000  |
| H | 4.246026000  | 2.272476000  | 2.629905000  |
| C | 3.000837000  | 0.884977000  | 3.718718000  |
| H | 2.178744000  | 0.762672000  | 3.008889000  |
| H | 2.721315000  | 1.664913000  | 4.434493000  |
| H | 3.095767000  | -0.050327000 | 4.279059000  |
| C | 1.615511000  | -1.029165000 | -3.367871000 |
| H | 1.128624000  | -1.064478000 | -2.390958000 |
| H | 1.101950000  | -1.728494000 | -4.035095000 |
| H | 1.460765000  | -0.022840000 | -3.768486000 |
| C | 3.096904000  | -1.371105000 | -3.266687000 |
| H | 3.581637000  | -1.260453000 | -4.243389000 |
| H | 3.225642000  | -2.414761000 | -2.970297000 |
| C | 6.257421000  | -1.133601000 | -3.651099000 |
| H | 5.755085000  | -1.989512000 | -4.111111000 |
| H | 7.331170000  | -1.352791000 | -3.640701000 |
| H | 6.106973000  | -0.268284000 | -4.305099000 |
| C | 5.747741000  | -0.869088000 | -2.238921000 |
| H | 6.343796000  | -0.085509000 | -1.757607000 |
| H | 5.870540000  | -1.758375000 | -1.610774000 |
| C | 4.028596000  | 1.305510000  | -2.987386000 |
| H | 5.026741000  | 1.743362000  | -2.867123000 |
| H | 3.880796000  | 1.127448000  | -4.057427000 |
| C | 2.970711000  | 2.241963000  | -2.417426000 |
| H | 1.966432000  | 1.898227000  | -2.680528000 |
| H | 3.075299000  | 3.267937000  | -2.785327000 |
| C | 1.698849000  | 3.202442000  | -0.006740000 |
| H | 1.615221000  | 4.061911000  | -0.680478000 |
| H | 0.788525000  | 2.609919000  | -0.130959000 |
| C | 1.827772000  | 3.651071000  | 1.443188000  |
| H | 0.934410000  | 4.199800000  | 1.756459000  |
| H | 2.690190000  | 4.308180000  | 1.593879000  |
| H | 1.934995000  | 2.791365000  | 2.106301000  |
| C | 4.568926000  | 3.218699000  | -0.267297000 |
| H | 4.794618000  | 3.179159000  | 0.802651000  |

|   |             |             |              |
|---|-------------|-------------|--------------|
| H | 5.405585000 | 2.723599000 | -0.770766000 |
| C | 4.469608000 | 4.666605000 | -0.735500000 |
| H | 3.653779000 | 5.204136000 | -0.244548000 |
| H | 4.310228000 | 4.735571000 | -1.815450000 |
| H | 5.398218000 | 5.202025000 | -0.509243000 |

**I\*-Yb, S=0, small core+solv+disp**

|    |              |              |              |
|----|--------------|--------------|--------------|
| Yb | 2.256320000  | -0.026296000 | 0.266640000  |
| Fe | -2.946272000 | -0.054738000 | -0.041188000 |
| P  | -2.820595000 | 1.959862000  | 0.833196000  |
| P  | -4.003001000 | 0.952724000  | -1.666499000 |
| P  | -4.312776000 | -0.829934000 | 1.459274000  |
| P  | -3.132136000 | -2.047282000 | -0.960076000 |
| Si | 5.135248000  | -1.565474000 | -0.963167000 |
| Si | 2.667414000  | -3.303257000 | -0.505210000 |
| Si | 2.529228000  | 2.158323000  | -2.169136000 |
| Si | 3.186206000  | 3.433781000  | 0.523471000  |
| O  | 2.535164000  | -0.500403000 | 2.604778000  |
| N  | -0.114946000 | -0.332841000 | 0.345678000  |
| N  | -1.250358000 | -0.236838000 | 0.153623000  |
| N  | 3.564331000  | -1.861506000 | -0.369343000 |
| N  | 2.694444000  | 2.144937000  | -0.472679000 |
| C  | 5.704733000  | 0.132625000  | -0.347954000 |
| H  | 4.957782000  | 0.914859000  | -0.527081000 |
| H  | 6.634670000  | 0.450988000  | -0.834453000 |
| H  | 5.903520000  | 0.100564000  | 0.730711000  |
| C  | 5.254438000  | -1.568677000 | -2.856538000 |
| H  | 4.985289000  | -2.551547000 | -3.262712000 |
| H  | 6.270715000  | -1.338744000 | -3.201001000 |
| H  | 4.578462000  | -0.833719000 | -3.306916000 |
| C  | 6.457174000  | -2.785873000 | -0.355660000 |
| H  | 7.461549000  | -2.422867000 | -0.609301000 |
| H  | 6.345908000  | -3.780398000 | -0.799797000 |
| H  | 6.415587000  | -2.904716000 | 0.733928000  |
| C  | 1.527639000  | -3.489659000 | 1.003638000  |
| H  | 2.122532000  | -3.582023000 | 1.919447000  |
| H  | 0.897560000  | -4.383975000 | 0.924990000  |
| H  | 0.860455000  | -2.628968000 | 1.127533000  |
| C  | 3.676170000  | -4.904939000 | -0.597250000 |
| H  | 4.293079000  | -4.945643000 | -1.502109000 |
| H  | 3.011990000  | -5.778511000 | -0.615885000 |
| H  | 4.342787000  | -5.012892000 | 0.265534000  |
| C  | 1.548891000  | -3.294108000 | -2.037448000 |
| H  | 0.895753000  | -2.414673000 | -2.035073000 |
| H  | 0.918160000  | -4.189330000 | -2.102322000 |
| H  | 2.149120000  | -3.239357000 | -2.953461000 |
| C  | 4.152507000  | 2.413007000  | -3.111686000 |
| H  | 4.575916000  | 3.402370000  | -2.899304000 |
| H  | 4.009158000  | 2.343981000  | -4.197519000 |
| H  | 4.902732000  | 1.668553000  | -2.825389000 |
| C  | 1.320003000  | 3.458604000  | -2.833272000 |
| H  | 0.401712000  | 3.471240000  | -2.237611000 |
| H  | 1.046460000  | 3.256898000  | -3.876049000 |
| H  | 1.751964000  | 4.464310000  | -2.795272000 |
| C  | 1.842281000  | 0.465469000  | -2.705498000 |
| H  | 2.510177000  | -0.369785000 | -2.455048000 |
| H  | 1.699989000  | 0.428787000  | -3.791567000 |
| H  | 0.861114000  | 0.265423000  | -2.254618000 |
| C  | 2.377945000  | 3.234164000  | 2.230119000  |
| H  | 1.285317000  | 3.214974000  | 2.145366000  |
| H  | 2.646023000  | 4.045360000  | 2.917792000  |
| H  | 2.695047000  | 2.294758000  | 2.697956000  |
| C  | 2.747222000  | 5.164200000  | -0.118884000 |
| H  | 3.333716000  | 5.411175000  | -1.011933000 |
| H  | 2.969184000  | 5.929192000  | 0.635885000  |
| H  | 1.690256000  | 5.256522000  | -0.386915000 |
| C  | 5.056594000  | 3.498356000  | 0.833861000  |
| H  | 5.421992000  | 2.600689000  | 1.344151000  |
| H  | 5.330576000  | 4.364874000  | 1.449413000  |
| H  | 5.606089000  | 3.574087000  | -0.111758000 |

|   |              |              |              |
|---|--------------|--------------|--------------|
| C | -4.196307000 | 3.014383000  | 0.191060000  |
| H | -5.110089000 | 2.680994000  | 0.693935000  |
| H | -4.051351000 | 4.071688000  | 0.437082000  |
| C | -4.289233000 | 2.770902000  | -1.307415000 |
| H | -3.505325000 | 3.333128000  | -1.825254000 |
| H | -5.246859000 | 3.104058000  | -1.719760000 |
| C | -2.880967000 | 2.314404000  | 2.646269000  |
| H | -2.991512000 | 3.394734000  | 2.795648000  |
| H | -3.793883000 | 1.851166000  | 3.034874000  |
| C | -1.650403000 | 1.789386000  | 3.377253000  |
| H | -0.754815000 | 2.353525000  | 3.100007000  |
| H | -1.469226000 | 0.739525000  | 3.133216000  |
| H | -1.766731000 | 1.870261000  | 4.463154000  |
| C | -1.302702000 | 2.882364000  | 0.318830000  |
| H | -0.442975000 | 2.289542000  | 0.647132000  |
| H | -1.279556000 | 2.817287000  | -0.772732000 |
| C | -1.170862000 | 4.326145000  | 0.781560000  |
| H | -0.239041000 | 4.758355000  | 0.406411000  |
| H | -1.149454000 | 4.410197000  | 1.872475000  |
| H | -1.992594000 | 4.950444000  | 0.415777000  |
| C | -5.726076000 | 0.412803000  | -2.131528000 |
| H | -5.701713000 | -0.678547000 | -2.215332000 |
| H | -6.331406000 | 0.629217000  | -1.243097000 |
| C | -6.366109000 | 1.014241000  | -3.377574000 |
| H | -5.850970000 | 0.696672000  | -4.288820000 |
| H | -6.359169000 | 2.109188000  | -3.357923000 |
| H | -7.411651000 | 0.697455000  | -3.465854000 |
| C | -3.214048000 | 1.111555000  | -3.345453000 |
| H | -3.264104000 | 0.132450000  | -3.829210000 |
| H | -3.805985000 | 1.798897000  | -3.960660000 |
| C | -1.768668000 | 1.580929000  | -3.254084000 |
| H | -1.231178000 | 1.029303000  | -2.476827000 |
| H | -1.708036000 | 2.643598000  | -3.001564000 |
| H | -1.242092000 | 1.444762000  | -4.203737000 |
| C | -4.898015000 | -2.566601000 | 1.059685000  |
| H | -4.276781000 | -3.258226000 | 1.638507000  |
| H | -5.932055000 | -2.718055000 | 1.385661000  |
| C | -4.721648000 | -2.834533000 | -0.426878000 |
| H | -5.517941000 | -2.349920000 | -1.001648000 |
| H | -4.749308000 | -3.902946000 | -0.666827000 |
| C | -5.926379000 | 0.031430000  | 1.819110000  |
| H | -5.685618000 | 1.092515000  | 1.945909000  |
| H | -6.494499000 | -0.035399000 | 0.883585000  |
| C | -6.768907000 | -0.453969000 | 2.993316000  |
| H | -6.272599000 | -0.269259000 | 3.950540000  |
| H | -6.981956000 | -1.526323000 | 2.932180000  |
| H | -7.732532000 | 0.067557000  | 3.019335000  |
| C | -3.694018000 | -1.131691000 | 3.190122000  |
| H | -3.599700000 | -0.159958000 | 3.684463000  |
| H | -4.446306000 | -1.699161000 | 3.750544000  |
| C | -2.356890000 | -1.859532000 | 3.211218000  |
| H | -1.624038000 | -1.357959000 | 2.572937000  |
| H | -2.453147000 | -2.887757000 | 2.847222000  |
| H | -1.958201000 | -1.915310000 | 4.228957000  |
| C | -3.155529000 | -2.380536000 | -2.778385000 |
| H | -3.472141000 | -3.417445000 | -2.942559000 |
| H | -3.939485000 | -1.749265000 | -3.208952000 |
| C | -1.809320000 | -2.115252000 | -3.443571000 |
| H | -1.074187000 | -2.876323000 | -3.170467000 |
| H | -1.398409000 | -1.146918000 | -3.144813000 |
| H | -1.899138000 | -2.121351000 | -4.534930000 |
| C | -1.838779000 | -3.232712000 | -0.379405000 |
| H | -0.882134000 | -2.807526000 | -0.694568000 |
| H | -1.838166000 | -3.161299000 | 0.712073000  |
| C | -1.952953000 | -4.681796000 | -0.830532000 |
| H | -1.130153000 | -5.274163000 | -0.416394000 |
| H | -1.905675000 | -4.778218000 | -1.919341000 |
| H | -2.887178000 | -5.144156000 | -0.495248000 |
| C | 1.628237000  | -0.147302000 | 3.652479000  |
| H | 0.816280000  | 0.380348000  | 3.146502000  |

|   |             |              |             |
|---|-------------|--------------|-------------|
| H | 2.106992000 | 0.563797000  | 4.336851000 |
| C | 1.087900000 | -1.350119000 | 4.398014000 |
| H | 1.857987000 | -1.854776000 | 4.988399000 |
| H | 0.653961000 | -2.071032000 | 3.700742000 |
| H | 0.307739000 | -1.021312000 | 5.091723000 |
| C | 3.797922000 | -1.060531000 | 3.000337000 |
| H | 3.628700000 | -1.870812000 | 3.717862000 |
| H | 4.185425000 | -1.508793000 | 2.079944000 |
| C | 4.744141000 | -0.016264000 | 3.554818000 |
| H | 5.718444000 | -0.474829000 | 3.753204000 |
| H | 4.384541000 | 0.416947000  | 4.493364000 |
| H | 4.892089000 | 0.794825000  | 2.835721000 |

**1\*-Sm, S=3, small core+solv+disp**

|    |              |              |              |
|----|--------------|--------------|--------------|
| Sm | 2.299938000  | -0.129757000 | -0.663811000 |
| Fe | -2.832413000 | -0.072779000 | -0.001135000 |
| P  | -3.762480000 | -1.077538000 | -1.721789000 |
| P  | -4.198729000 | -1.298151000 | 1.176957000  |
| P  | -3.622156000 | 1.888643000  | -0.492655000 |
| Si | 5.184057000  | -1.931008000 | -1.040098000 |
| P  | -1.992521000 | 0.922391000  | 1.779245000  |
| Si | 3.027641000  | -3.345925000 | 0.630386000  |
| Si | 2.909122000  | 3.273660000  | -0.837403000 |
| Si | 4.326082000  | 1.916093000  | 1.486035000  |
| N  | -1.262505000 | -0.481912000 | -0.568519000 |
| N  | 3.653271000  | -2.079126000 | -0.316216000 |
| N  | 3.220212000  | 1.951250000  | 0.185189000  |
| N  | -0.200909000 | -0.689955000 | -0.974286000 |
| C  | -5.457599000 | 2.145752000  | -0.686453000 |
| H  | -5.815322000 | 1.335910000  | -1.331739000 |
| H  | -5.872803000 | 1.938907000  | 0.307406000  |
| C  | -3.534926000 | -2.654045000 | 2.268433000  |
| H  | -3.121051000 | -2.189420000 | 3.167630000  |
| H  | -4.363533000 | -3.292502000 | 2.596223000  |
| C  | -5.342283000 | -2.322650000 | 0.102808000  |
| H  | -4.896393000 | -3.318530000 | 0.007295000  |
| H  | -6.318743000 | -2.453127000 | 0.580312000  |
| C  | -2.974629000 | 2.787893000  | -1.988586000 |
| H  | -3.417659000 | 2.328627000  | -2.876932000 |
| H  | -3.320039000 | 3.828122000  | -1.965813000 |
| C  | -4.067941000 | -0.299807000 | -3.371462000 |
| H  | -4.738207000 | -0.947389000 | -3.949070000 |
| H  | -4.617182000 | 0.630213000  | -3.191230000 |
| C  | 5.146545000  | -0.347583000 | -2.100725000 |
| H  | 4.465683000  | -0.460225000 | -2.957337000 |
| H  | 6.134248000  | -0.126109000 | -2.521270000 |
| H  | 4.853099000  | 0.546175000  | -1.531164000 |
| C  | -5.453147000 | -1.671656000 | -1.266872000 |
| H  | -6.096501000 | -0.786177000 | -1.223922000 |
| H  | -5.870091000 | -2.345571000 | -2.022828000 |
| C  | -3.202903000 | 3.172770000  | 0.805159000  |
| H  | -2.301982000 | 3.694443000  | 0.464774000  |
| H  | -3.994841000 | 3.924155000  | 0.887037000  |
| C  | 5.633290000  | -3.346265000 | -2.217174000 |
| H  | 5.756025000  | -4.288793000 | -1.670173000 |
| H  | 6.573297000  | -3.152097000 | -2.749097000 |
| H  | 4.848826000  | -3.501813000 | -2.967167000 |
| C  | -2.880554000 | -2.632220000 | -2.202700000 |
| H  | -1.871916000 | -2.324418000 | -2.498547000 |
| H  | -2.745207000 | -3.190013000 | -1.271278000 |
| C  | -5.433328000 | -0.478268000 | 2.308698000  |
| H  | -4.891283000 | 0.296043000  | 2.861693000  |
| H  | -6.107760000 | 0.060442000  | 1.631495000  |
| C  | -2.463420000 | -3.479539000 | 1.568025000  |
| H  | -1.713754000 | -2.829844000 | 1.105449000  |
| H  | -2.891466000 | -4.101336000 | 0.774385000  |
| H  | -1.959340000 | -4.151859000 | 2.270081000  |
| C  | 2.437545000  | -4.826419000 | -0.394129000 |
| H  | 1.676232000  | -4.512862000 | -1.119110000 |
| H  | 1.999389000  | -5.614919000 | 0.230644000  |

|   |              |              |              |
|---|--------------|--------------|--------------|
| H | 3.263947000  | -5.270428000 | -0.961344000 |
| C | -1.875666000 | 0.219890000  | 3.488842000  |
| H | -1.679867000 | 1.044713000  | 4.184288000  |
| H | -2.866077000 | -0.168682000 | 3.746000000  |
| C | -2.780215000 | -0.032381000 | -4.144277000 |
| H | -2.317859000 | -0.966100000 | -4.478296000 |
| H | -2.045754000 | 0.492831000  | -3.528315000 |
| H | -2.973053000 | 0.576420000  | -5.033739000 |
| C | 2.150655000  | 2.630780000  | -2.465730000 |
| H | 2.866085000  | 2.013416000  | -3.025972000 |
| H | 1.888747000  | 3.470363000  | -3.120396000 |
| H | 1.224194000  | 2.056225000  | -2.333697000 |
| C | 6.615027000  | -1.781886000 | 0.189527000  |
| H | 6.392948000  | -1.056242000 | 0.978045000  |
| H | 7.547470000  | -1.473337000 | -0.299256000 |
| H | 6.803564000  | -2.745098000 | 0.677646000  |
| C | -1.454961000 | 2.731307000  | -2.071342000 |
| H | -1.093908000 | 3.135101000  | -3.022705000 |
| H | -1.099495000 | 1.701986000  | -1.970823000 |
| H | -0.984527000 | 3.317316000  | -1.275778000 |
| C | -3.518535000 | -3.506670000 | -3.274198000 |
| H | -2.897628000 | -4.388854000 | -3.465190000 |
| H | -3.632334000 | -2.977416000 | -4.225363000 |
| H | -4.507990000 | -3.865831000 | -2.973411000 |
| C | -0.254023000 | 1.492374000  | 1.512303000  |
| H | 0.332380000  | 0.568149000  | 1.441574000  |
| H | -0.231104000 | 1.937893000  | 0.512414000  |
| C | 1.671691000  | 4.526886000  | -0.134866000 |
| H | 0.721226000  | 4.048389000  | 0.123992000  |
| H | 1.457313000  | 5.331398000  | -0.849456000 |
| H | 2.060184000  | 4.989425000  | 0.779728000  |
| C | -0.812027000 | -0.861833000 | 3.629385000  |
| H | 0.193503000  | -0.434371000 | 3.588403000  |
| H | -0.882758000 | -1.604997000 | 2.831942000  |
| H | -0.903916000 | -1.384344000 | 4.587238000  |
| C | -5.955335000 | 3.488334000  | -1.209534000 |
| H | -5.653884000 | 3.653933000  | -2.248021000 |
| H | -5.575456000 | 4.327080000  | -0.616879000 |
| H | -7.049797000 | 3.535675000  | -1.175218000 |
| C | 1.504744000  | -2.695350000 | 1.558935000  |
| H | 1.781030000  | -1.884376000 | 2.243350000  |
| H | 1.039679000  | -3.481175000 | 2.165324000  |
| H | 0.732895000  | -2.327872000 | 0.870563000  |
| C | 4.227272000  | -4.004805000 | 1.938568000  |
| H | 5.090641000  | -4.498885000 | 1.477752000  |
| H | 3.744811000  | -4.736997000 | 2.598263000  |
| H | 4.608331000  | -3.189533000 | 2.564099000  |
| C | -2.930245000 | 2.479861000  | 2.128979000  |
| H | -3.868396000 | 2.169223000  | 2.602593000  |
| H | -2.400275000 | 3.121295000  | 2.841047000  |
| C | -6.225430000 | -1.352927000 | 3.273571000  |
| H | -6.748129000 | -2.165363000 | 2.757894000  |
| H | -6.983308000 | -0.761241000 | 3.799623000  |
| H | -5.579083000 | -1.804415000 | 4.031975000  |
| C | 6.141271000  | 1.923102000  | 0.939024000  |
| H | 6.341529000  | 1.169342000  | 0.171653000  |
| H | 6.817658000  | 1.727890000  | 1.780703000  |
| H | 6.415207000  | 2.897552000  | 0.518390000  |
| C | 4.440046000  | 4.262099000  | -1.352527000 |
| H | 4.909884000  | 4.749346000  | -0.490348000 |
| H | 4.188656000  | 5.048198000  | -2.075636000 |
| H | 5.191835000  | 3.611376000  | -1.813330000 |
| C | 0.368033000  | 2.427068000  | 2.535639000  |
| H | 1.392944000  | 2.652565000  | 2.231237000  |
| H | 0.398974000  | 1.982242000  | 3.535032000  |
| H | -0.173972000 | 3.374957000  | 2.606034000  |
| C | 4.181358000  | 3.373756000  | 2.693959000  |
| H | 4.359793000  | 4.328518000  | 2.184637000  |
| H | 4.928376000  | 3.289634000  | 3.493707000  |
| H | 3.196872000  | 3.433141000  | 3.170295000  |



|   |             |              |             |
|---|-------------|--------------|-------------|
| C | 4.025153000 | 0.328423000  | 2.475797000 |
| H | 3.035902000 | 0.346531000  | 2.951224000 |
| H | 4.764233000 | 0.196787000  | 3.275064000 |
| H | 4.080968000 | -0.559590000 | 1.832608000 |

**3, S=3, small core+solv+disp**

|    |              |              |              |
|----|--------------|--------------|--------------|
| Sm | -0.101018000 | 2.191529000  | 0.008920000  |
| Fe | 4.071971000  | -1.239262000 | -0.224972000 |
| Fe | -3.964758000 | -1.529678000 | 0.149066000  |
| P  | 3.847471000  | -1.644948000 | -2.370675000 |
| P  | 4.204792000  | -3.411610000 | -0.038492000 |
| P  | 6.091700000  | -0.469354000 | -0.359841000 |
| P  | 4.177010000  | -0.805731000 | 1.939593000  |
| P  | -4.666613000 | -0.527919000 | -1.682020000 |
| P  | -5.892154000 | -0.936965000 | 0.959903000  |
| P  | -3.334470000 | -2.559690000 | 1.984952000  |
| P  | -3.952058000 | -3.503587000 | -0.740432000 |
| Si | -0.676131000 | 3.088674000  | -3.315919000 |
| Si | -2.066786000 | 4.872698000  | -1.239873000 |
| Si | 2.193256000  | 4.428004000  | 1.478946000  |
| Si | -0.061592000 | 3.459538000  | 3.295312000  |
| N  | 2.720179000  | -0.169875000 | -0.327766000 |
| N  | 1.852531000  | 0.582771000  | -0.408094000 |
| N  | -1.638511000 | 0.161714000  | 0.201009000  |
| N  | -2.566871000 | -0.516639000 | 0.187424000  |
| N  | -1.205059000 | 3.495407000  | -1.753657000 |
| N  | 0.833069000  | 3.474771000  | 1.852504000  |
| C  | 3.910243000  | 0.825521000  | -3.686533000 |
| H  | 2.876838000  | 0.785046000  | -4.039873000 |
| H  | 4.455376000  | 1.515406000  | -4.339068000 |
| H  | 3.893831000  | 1.253318000  | -2.680388000 |
| C  | 4.549974000  | -0.559591000 | -3.688529000 |
| H  | 5.626768000  | -0.491318000 | -3.500341000 |
| H  | 4.433168000  | -1.044825000 | -4.664965000 |
| C  | 1.767480000  | -2.131909000 | -4.326864000 |
| H  | 0.684318000  | -2.169575000 | -4.486847000 |
| H  | 2.176430000  | -3.105741000 | -4.616599000 |
| H  | 2.168473000  | -1.383673000 | -5.017612000 |
| C  | 2.073875000  | -1.787274000 | -2.876480000 |
| H  | 1.641678000  | -2.524716000 | -2.192497000 |
| H  | 1.602523000  | -0.839817000 | -2.602521000 |
| C  | 4.538610000  | -3.306987000 | -2.789506000 |
| H  | 4.252787000  | -3.633529000 | -3.795277000 |
| H  | 5.630083000  | -3.212651000 | -2.769242000 |
| C  | 4.059236000  | -4.259239000 | -1.703621000 |
| H  | 4.605868000  | -5.208774000 | -1.709062000 |
| H  | 3.000230000  | -4.495033000 | -1.856920000 |
| C  | 5.797388000  | -4.191409000 | 0.556387000  |
| H  | 6.491659000  | -4.058664000 | -0.281341000 |
| H  | 6.185586000  | -3.562447000 | 1.364329000  |
| C  | 5.772832000  | -5.654173000 | 0.983029000  |
| H  | 5.374978000  | -6.302270000 | 0.194788000  |
| H  | 5.160225000  | -5.805661000 | 1.876716000  |
| H  | 6.784240000  | -6.007523000 | 1.214992000  |
| C  | 2.939732000  | -4.426663000 | 0.879385000  |
| H  | 3.029967000  | -5.473250000 | 0.564969000  |
| H  | 3.171554000  | -4.400734000 | 1.947861000  |
| C  | 1.534477000  | -3.907514000 | 0.623988000  |
| H  | 0.787937000  | -4.509392000 | 1.152496000  |
| H  | 1.291721000  | -3.939372000 | -0.442001000 |
| H  | 1.439181000  | -2.864074000 | 0.936270000  |
| C  | 8.850675000  | -0.758403000 | -1.258458000 |
| H  | 9.579814000  | -1.453224000 | -1.691169000 |
| H  | 9.209086000  | -0.490994000 | -0.259171000 |
| H  | 8.863697000  | 0.147578000  | -1.870835000 |
| C  | 7.465292000  | -1.395359000 | -1.211178000 |
| H  | 7.515137000  | -2.362748000 | -0.702032000 |
| H  | 7.113796000  | -1.608968000 | -2.227251000 |
| C  | 6.360438000  | 1.220546000  | -1.095328000 |
| H  | 7.400064000  | 1.530665000  | -0.941320000 |

|   |              |              |              |
|---|--------------|--------------|--------------|
| H | 6.221169000  | 1.110223000  | -2.175975000 |
| C | 5.405511000  | 2.271848000  | -0.548576000 |
| H | 4.385746000  | 1.881715000  | -0.490999000 |
| H | 5.394767000  | 3.166658000  | -1.178865000 |
| H | 5.695597000  | 2.587402000  | 0.456294000  |
| C | 6.820197000  | -0.259280000 | 1.345616000  |
| H | 7.220098000  | -1.238215000 | 1.638999000  |
| H | 7.653993000  | 0.451310000  | 1.346598000  |
| C | 5.718367000  | 0.169859000  | 2.306663000  |
| H | 5.460976000  | 1.221467000  | 2.150013000  |
| H | 6.022311000  | 0.069985000  | 3.353598000  |
| C | 4.238010000  | -2.152610000 | 3.218460000  |
| H | 3.340062000  | -2.754878000 | 3.054622000  |
| H | 5.086934000  | -2.795076000 | 2.962781000  |
| C | 4.314299000  | -1.730534000 | 4.681347000  |
| H | 4.366563000  | -2.612598000 | 5.329656000  |
| H | 3.435900000  | -1.153905000 | 4.984771000  |
| H | 5.198571000  | -1.121477000 | 4.891408000  |
| C | 2.857406000  | 0.276556000  | 2.647582000  |
| H | 3.195980000  | 0.656680000  | 3.617435000  |
| H | 2.755475000  | 1.146743000  | 1.994116000  |
| C | 1.508123000  | -0.420446000 | 2.772441000  |
| H | 1.147726000  | -0.756005000 | 1.796162000  |
| H | 0.766694000  | 0.267745000  | 3.187283000  |
| H | 1.552012000  | -1.290667000 | 3.434891000  |
| C | 0.095237000  | 1.351248000  | -3.247937000 |
| H | 1.061262000  | 1.369988000  | -2.729493000 |
| H | 0.279246000  | 0.959452000  | -4.255203000 |
| H | -0.544886000 | 0.628041000  | -2.729259000 |
| C | 0.687847000  | 4.217916000  | -3.997409000 |
| H | 0.344078000  | 5.257142000  | -4.065883000 |
| H | 1.016266000  | 3.911013000  | -4.998861000 |
| H | 1.565398000  | 4.208550000  | -3.340345000 |
| C | -2.011829000 | 3.036647000  | -4.661389000 |
| H | -1.604158000 | 2.636220000  | -5.598467000 |
| H | -2.403111000 | 4.036907000  | -4.876259000 |
| H | -2.860415000 | 2.409695000  | -4.372987000 |
| C | -0.951314000 | 6.097900000  | -0.326161000 |
| H | -0.459933000 | 5.589774000  | 0.510766000  |
| H | -1.510384000 | 6.950367000  | 0.079672000  |
| H | -0.165762000 | 6.492269000  | -0.981305000 |
| C | -2.941215000 | 5.850827000  | -2.610680000 |
| H | -2.225919000 | 6.234444000  | -3.347754000 |
| H | -3.469500000 | 6.715441000  | -2.188950000 |
| H | -3.678573000 | 5.245445000  | -3.149084000 |
| C | -3.409227000 | 4.396728000  | 0.018313000  |
| H | -4.253355000 | 3.895731000  | -0.466024000 |
| H | -3.801374000 | 5.278409000  | 0.540067000  |
| H | -3.021912000 | 3.715595000  | 0.785277000  |
| C | 2.457195000  | 4.349125000  | -0.398220000 |
| H | 2.584908000  | 3.315694000  | -0.747191000 |
| H | 3.349357000  | 4.902862000  | -0.712062000 |
| H | 1.599851000  | 4.781708000  | -0.926529000 |
| C | 3.792973000  | 3.834709000  | 2.307993000  |
| H | 3.682675000  | 3.812461000  | 3.398415000  |
| H | 4.639994000  | 4.490033000  | 2.069600000  |
| H | 4.047962000  | 2.823465000  | 1.984032000  |
| C | 2.065830000  | 6.259333000  | 1.956681000  |
| H | 1.153823000  | 6.725716000  | 1.571767000  |
| H | 2.921157000  | 6.823879000  | 1.563346000  |
| H | 2.070819000  | 6.381835000  | 3.046552000  |
| C | -0.946323000 | 5.089872000  | 3.685216000  |
| H | -0.239619000 | 5.903986000  | 3.878580000  |
| H | -1.594948000 | 4.996789000  | 4.565897000  |
| H | -1.573669000 | 5.395662000  | 2.839536000  |
| C | -1.463186000 | 2.186679000  | 3.133696000  |
| H | -2.215778000 | 2.518271000  | 2.408534000  |
| H | -1.988261000 | 2.070312000  | 4.088969000  |
| H | -1.128364000 | 1.190038000  | 2.826881000  |
| C | 0.945529000  | 3.003044000  | 4.836844000  |

|   |              |              |              |
|---|--------------|--------------|--------------|
| H | 1.498487000  | 2.068718000  | 4.690280000  |
| H | 0.309045000  | 2.883515000  | 5.722777000  |
| H | 1.679942000  | 3.784836000  | 5.065192000  |
| C | -2.839263000 | -0.858139000 | -3.805187000 |
| H | -2.607178000 | -1.356940000 | -4.752331000 |
| H | -2.161972000 | -1.250006000 | -3.041950000 |
| H | -2.610212000 | 0.202351000  | -3.930436000 |
| C | -4.298482000 | -1.064067000 | -3.415022000 |
| H | -4.582921000 | -2.119398000 | -3.487195000 |
| H | -4.960019000 | -0.519836000 | -4.099680000 |
| C | -4.220038000 | 1.264135000  | -1.736733000 |
| H | -4.315934000 | 1.622732000  | -0.709139000 |
| H | -3.148044000 | 1.328122000  | -1.951883000 |
| C | -5.012847000 | 2.143884000  | -2.692349000 |
| H | -6.056607000 | 2.245959000  | -2.377775000 |
| H | -5.011819000 | 1.754027000  | -3.715399000 |
| H | -4.579114000 | 3.147044000  | -2.728250000 |
| C | -6.517037000 | -0.514125000 | -1.705053000 |
| H | -6.912827000 | 0.133450000  | -2.494547000 |
| H | -6.835668000 | -1.538506000 | -1.926346000 |
| C | -6.977752000 | -0.099439000 | -0.317555000 |
| H | -8.035758000 | -0.323127000 | -0.146325000 |
| H | -6.852477000 | 0.981382000  | -0.190395000 |
| C | -5.083892000 | 1.551159000  | 1.992470000  |
| H | -5.477600000 | 2.147376000  | 1.163435000  |
| H | -4.080643000 | 1.219754000  | 1.708476000  |
| H | -4.997666000 | 2.217104000  | 2.857233000  |
| C | -5.979460000 | 0.356998000  | 2.298380000  |
| H | -7.019774000 | 0.677342000  | 2.429444000  |
| H | -5.672899000 | -0.112028000 | 3.237655000  |
| C | -7.065845000 | -2.226990000 | 1.623897000  |
| H | -7.333889000 | -2.830762000 | 0.747954000  |
| H | -6.476102000 | -2.887642000 | 2.268542000  |
| C | -8.317030000 | -1.762369000 | 2.360643000  |
| H | -8.964814000 | -2.613375000 | 2.601161000  |
| H | -8.909733000 | -1.061753000 | 1.763121000  |
| H | -8.068486000 | -1.264660000 | 3.302681000  |
| C | -3.854532000 | -2.119327000 | 3.706699000  |
| H | -4.947581000 | -2.059769000 | 3.710665000  |
| H | -3.588787000 | -2.944356000 | 4.378565000  |
| C | -3.238308000 | -0.809512000 | 4.184951000  |
| H | -3.694270000 | -0.474865000 | 5.122800000  |
| H | -3.366643000 | -0.016348000 | 3.445160000  |
| H | -2.164055000 | -0.915068000 | 4.361679000  |
| C | -1.495567000 | -2.627387000 | 2.176745000  |
| H | -1.109884000 | -2.953700000 | 1.206896000  |
| H | -1.171619000 | -1.586533000 | 2.274113000  |
| C | -0.932209000 | -3.475194000 | 3.308252000  |
| H | -1.201979000 | -4.531137000 | 3.202175000  |
| H | -1.285526000 | -3.139934000 | 4.288244000  |
| H | 0.161231000  | -3.418977000 | 3.321222000  |
| C | -3.838283000 | -4.339423000 | 1.903866000  |
| H | -3.360292000 | -4.940154000 | 2.685481000  |
| H | -4.918294000 | -4.359457000 | 2.087464000  |
| C | -3.526828000 | -4.841873000 | 0.503075000  |
| H | -4.048923000 | -5.776452000 | 0.273694000  |
| H | -2.453880000 | -5.042559000 | 0.410170000  |
| C | -5.500766000 | -4.206355000 | -1.507999000 |
| H | -6.214254000 | -4.274538000 | -0.677720000 |
| H | -5.892572000 | -3.429100000 | -2.173226000 |
| C | -5.412886000 | -5.532339000 | -2.255282000 |
| H | -6.409907000 | -5.876731000 | -2.553565000 |
| H | -4.966945000 | -6.322591000 | -1.641953000 |
| H | -4.813203000 | -5.442907000 | -3.165929000 |
| C | -2.699917000 | -3.927699000 | -2.054425000 |
| H | -2.711961000 | -5.009759000 | -2.232143000 |
| H | -3.017336000 | -3.451412000 | -2.986410000 |
| C | -1.298206000 | -3.468726000 | -1.679062000 |
| H | -0.922587000 | -4.023903000 | -0.815190000 |
| H | -1.281080000 | -2.408233000 | -1.411193000 |

H -0.596015000 -3.632760000 -2.503673000

**1-Ce, S=1/2, large core**

|    |              |              |              |
|----|--------------|--------------|--------------|
| Ce | 9.394044000  | 8.083787000  | 15.827142000 |
| Fe | 8.777550000  | 6.439030000  | 10.521308000 |
| P  | 6.508392000  | 6.246307000  | 10.677688000 |
| P  | 8.658782000  | 4.314766000  | 9.747141000  |
| P  | 11.039930000 | 6.568325000  | 10.289457000 |
| P  | 8.743724000  | 8.013520000  | 8.917659000  |
| Si | 6.998038000  | 10.681839000 | 15.492693000 |
| Si | 8.865603000  | 11.149219000 | 17.844701000 |
| Si | 7.254344000  | 6.424943000  | 18.429056000 |
| Si | 8.919458000  | 4.665584000  | 16.634299000 |
| Si | 12.887045000 | 7.579680000  | 17.144211000 |
| Si | 12.434697000 | 9.657500000  | 14.995601000 |
| N  | 9.030455000  | 7.296217000  | 13.273181000 |
| N  | 8.919938000  | 6.929771000  | 12.179580000 |
| N  | 8.342843000  | 10.159983000 | 16.484641000 |
| N  | 8.395129000  | 6.276154000  | 17.089938000 |
| N  | 11.791272000 | 8.398954000  | 16.034472000 |
| C  | 6.369846000  | 9.164363000  | 14.518963000 |
| H  | 7.082893000  | 8.815669000  | 13.762160000 |
| H  | 5.455191000  | 9.440751000  | 13.984232000 |
| H  | 6.117914000  | 8.329530000  | 15.182887000 |
| C  | 7.454733000  | 11.998021000 | 14.193083000 |
| H  | 8.239909000  | 11.645907000 | 13.516786000 |
| H  | 7.813864000  | 12.916591000 | 14.667390000 |
| H  | 6.578766000  | 12.257233000 | 13.586180000 |
| C  | 5.490728000  | 11.378828000 | 16.420678000 |
| H  | 5.706491000  | 12.353353000 | 16.870109000 |
| H  | 5.145891000  | 10.707299000 | 17.211654000 |
| H  | 4.665825000  | 11.522209000 | 15.712450000 |
| C  | 9.349962000  | 12.917237000 | 17.324503000 |
| H  | 8.471337000  | 13.488850000 | 17.005241000 |
| H  | 10.066352000 | 12.919550000 | 16.497245000 |
| H  | 9.801488000  | 13.456449000 | 18.165289000 |
| C  | 7.574747000  | 11.342915000 | 19.232618000 |
| H  | 7.236665000  | 10.370346000 | 19.603232000 |
| H  | 6.692549000  | 11.910622000 | 18.926073000 |
| H  | 8.035821000  | 11.875628000 | 20.073307000 |
| C  | 10.356377000 | 10.337462000 | 18.694802000 |
| H  | 11.157664000 | 10.080553000 | 17.997291000 |
| H  | 10.053577000 | 9.421882000  | 19.215861000 |
| H  | 10.763195000 | 11.017090000 | 19.452320000 |
| C  | 6.038612000  | 7.852282000  | 18.142437000 |
| H  | 5.327029000  | 7.598756000  | 17.348625000 |
| H  | 6.556538000  | 8.772523000  | 17.858756000 |
| H  | 5.461864000  | 8.048644000  | 19.053669000 |
| C  | 6.133194000  | 4.905401000  | 18.709494000 |
| H  | 6.676951000  | 3.983709000  | 18.935575000 |
| H  | 5.489095000  | 4.718398000  | 17.844315000 |
| H  | 5.480049000  | 5.117025000  | 19.564732000 |
| C  | 8.154352000  | 6.739662000  | 20.074850000 |
| H  | 8.725025000  | 7.673595000  | 20.047076000 |
| H  | 8.856959000  | 5.931022000  | 20.300487000 |
| H  | 7.441641000  | 6.810506000  | 20.904672000 |
| C  | 9.626304000  | 3.611496000  | 18.054906000 |
| H  | 8.896147000  | 3.444921000  | 18.852525000 |
| H  | 10.506551000 | 4.081880000  | 18.502736000 |
| H  | 9.928401000  | 2.628350000  | 17.674534000 |
| C  | 10.314721000 | 4.823534000  | 15.346332000 |
| H  | 11.150080000 | 5.443258000  | 15.688655000 |
| H  | 9.952130000  | 5.227596000  | 14.395078000 |
| H  | 10.725016000 | 3.828320000  | 15.141102000 |
| C  | 7.573617000  | 3.620276000  | 15.781362000 |
| H  | 7.096355000  | 4.192140000  | 14.978796000 |
| H  | 6.792924000  | 3.300694000  | 16.476413000 |
| H  | 8.017258000  | 2.719743000  | 15.340235000 |
| C  | 11.910032000 | 6.814693000  | 18.582825000 |
| H  | 10.972743000 | 6.345942000  | 18.266702000 |

|   |              |              |              |
|---|--------------|--------------|--------------|
| H | 11.659849000 | 7.581598000  | 19.322622000 |
| H | 12.511944000 | 6.050911000  | 19.088490000 |
| C | 14.184194000 | 8.717438000  | 17.954949000 |
| H | 13.715913000 | 9.558185000  | 18.475867000 |
| H | 14.905302000 | 9.119921000  | 17.236147000 |
| H | 14.750311000 | 8.140353000  | 18.695960000 |
| C | 13.900745000 | 6.194487000  | 16.310662000 |
| H | 14.508707000 | 6.593456000  | 15.492352000 |
| H | 13.271196000 | 5.397966000  | 15.903237000 |
| H | 14.581594000 | 5.738368000  | 17.039223000 |
| C | 13.963656000 | 9.128113000  | 13.988196000 |
| H | 13.794487000 | 8.191943000  | 13.449380000 |
| H | 14.834262000 | 8.986534000  | 14.637212000 |
| H | 14.223973000 | 9.902870000  | 13.257205000 |
| C | 11.078121000 | 10.167554000 | 13.751358000 |
| H | 10.218755000 | 10.621526000 | 14.261398000 |
| H | 10.721051000 | 9.343360000  | 13.123657000 |
| H | 11.479723000 | 10.936959000 | 13.081863000 |
| C | 12.929872000 | 11.277515000 | 15.862294000 |
| H | 13.783523000 | 11.144267000 | 16.532078000 |
| H | 12.104943000 | 11.690464000 | 16.449365000 |
| H | 13.211361000 | 12.024617000 | 15.110223000 |
| C | 4.474744000  | 5.314979000  | 12.564128000 |
| H | 4.285213000  | 4.377054000  | 12.032698000 |
| H | 3.749438000  | 6.052392000  | 12.206031000 |
| H | 4.257199000  | 5.133987000  | 13.622196000 |
| C | 5.915720000  | 5.788833000  | 12.397816000 |
| H | 6.620892000  | 5.028314000  | 12.748658000 |
| H | 6.106988000  | 6.671915000  | 13.016218000 |
| C | 5.195916000  | 7.483388000  | 10.132457000 |
| H | 5.493660000  | 7.824955000  | 9.134975000  |
| H | 4.264293000  | 6.921016000  | 9.997923000  |
| C | 4.961847000  | 8.664922000  | 11.067329000 |
| H | 4.267778000  | 9.382928000  | 10.616822000 |
| H | 5.887433000  | 9.196434000  | 11.301410000 |
| H | 4.525833000  | 8.340661000  | 12.015963000 |
| C | 5.937886000  | 4.789890000  | 9.643450000  |
| H | 4.900372000  | 4.527041000  | 9.876466000  |
| H | 5.964441000  | 5.125928000  | 8.599713000  |
| C | 6.901732000  | 3.639867000  | 9.871635000  |
| H | 6.748386000  | 2.818241000  | 9.163861000  |
| H | 6.772452000  | 3.232151000  | 10.879006000 |
| C | 9.600333000  | 2.909425000  | 10.582301000 |
| H | 9.392644000  | 1.973544000  | 10.052897000 |
| H | 10.666849000 | 3.121559000  | 10.451002000 |
| C | 9.276385000  | 2.767187000  | 12.066342000 |
| H | 8.275446000  | 2.354875000  | 12.226103000 |
| H | 9.319861000  | 3.733573000  | 12.577138000 |
| H | 9.983722000  | 2.090181000  | 12.556948000 |
| C | 8.965982000  | 3.939833000  | 7.910673000  |
| H | 8.128179000  | 4.436441000  | 7.405934000  |
| H | 9.860213000  | 4.495823000  | 7.618879000  |
| C | 9.077836000  | 2.487383000  | 7.452664000  |
| H | 9.116212000  | 2.431941000  | 6.358665000  |
| H | 8.224739000  | 1.880914000  | 7.774867000  |
| H | 9.985591000  | 2.009243000  | 7.832431000  |
| C | 12.177873000 | 6.428579000  | 11.766977000 |
| H | 13.115576000 | 6.933755000  | 11.510370000 |
| H | 11.711440000 | 7.011317000  | 12.566624000 |
| C | 12.443785000 | 5.003772000  | 12.242733000 |
| H | 12.945245000 | 4.400812000  | 11.478271000 |
| H | 11.517037000 | 4.496942000  | 12.520350000 |
| H | 13.087798000 | 5.014170000  | 13.127344000 |
| C | 11.974614000 | 5.565445000  | 8.994240000  |
| H | 11.795391000 | 4.509233000  | 9.217986000  |
| H | 11.462090000 | 5.764200000  | 8.047075000  |
| C | 13.472528000 | 5.823196000  | 8.842236000  |
| H | 13.887603000 | 5.185055000  | 8.054103000  |
| H | 14.024894000 | 5.605418000  | 9.760462000  |
| H | 13.687138000 | 6.858848000  | 8.563015000  |

|   |              |              |              |
|---|--------------|--------------|--------------|
| C | 11.409914000 | 8.306649000  | 9.697220000  |
| H | 11.179654000 | 8.968017000  | 10.538518000 |
| H | 12.470606000 | 8.434342000  | 9.455631000  |
| C | 10.501819000 | 8.592982000  | 8.508669000  |
| H | 10.840335000 | 8.039460000  | 7.624701000  |
| H | 10.497507000 | 9.655083000  | 8.241811000  |
| C | 8.077368000  | 7.674968000  | 7.179845000  |
| H | 8.625273000  | 6.784543000  | 6.850701000  |
| H | 7.036770000  | 7.352835000  | 7.310981000  |
| C | 8.163647000  | 8.775354000  | 6.123857000  |
| H | 7.830890000  | 8.400861000  | 5.149011000  |
| H | 9.187871000  | 9.140958000  | 5.997645000  |
| H | 7.532378000  | 9.633490000  | 6.371360000  |
| C | 7.950388000  | 9.692740000  | 9.252130000  |
| H | 8.151112000  | 10.343931000 | 8.394070000  |
| H | 6.867976000  | 9.539741000  | 9.287416000  |
| C | 8.438871000  | 10.345440000 | 10.540294000 |
| H | 9.493287000  | 10.631561000 | 10.471619000 |
| H | 8.338609000  | 9.667163000  | 11.392596000 |
| H | 7.871898000  | 11.256419000 | 10.758919000 |

**1-Sm, S=5/2, large core**

|    |              |              |              |
|----|--------------|--------------|--------------|
| Sm | 2.442714000  | 4.753162000  | 10.787204000 |
| Fe | 2.423295000  | 4.174801000  | 16.282981000 |
| P  | 0.177849000  | 3.778167000  | 16.176426000 |
| P  | 1.845722000  | 6.017721000  | 17.427901000 |
| P  | 4.677561000  | 4.464976000  | 16.425696000 |
| P  | 2.793964000  | 2.418360000  | 17.660607000 |
| Si | 1.666499000  | 1.313559000  | 10.694977000 |
| Si | -0.129654000 | 2.943180000  | 8.905889000  |
| Si | -0.023044000 | 7.238120000  | 10.921700000 |
| Si | 2.016256000  | 7.837364000  | 8.790475000  |
| Si | 5.304508000  | 3.583958000  | 8.783902000  |
| Si | 5.699477000  | 5.877472000  | 10.734313000 |
| N  | 2.512724000  | 4.503926000  | 13.407535000 |
| N  | 2.484894000  | 4.328298000  | 14.552578000 |
| N  | 1.228947000  | 2.885948000  | 10.036076000 |
| N  | 1.430216000  | 6.759983000  | 10.064808000 |
| N  | 4.643254000  | 4.687449000  | 9.995497000  |
| C  | 2.432328000  | 0.083418000  | 9.460116000  |
| H  | 1.727289000  | -0.229657000 | 8.686449000  |
| H  | 2.750826000  | -0.815444000 | 10.002139000 |
| H  | 3.312086000  | 0.500791000  | 8.962768000  |
| C  | 0.204292000  | 0.402321000  | 11.511931000 |
| H  | -0.284702000 | 1.030891000  | 12.262639000 |
| H  | 0.555142000  | -0.510068000 | 12.008603000 |
| H  | -0.553671000 | 0.105953000  | 10.779840000 |
| C  | 2.978708000  | 1.530311000  | 12.058555000 |
| H  | 3.843313000  | 2.124401000  | 11.738797000 |
| H  | 3.365498000  | 0.540349000  | 12.327618000 |
| H  | 2.568617000  | 1.985901000  | 12.963369000 |
| C  | -1.799958000 | 3.115913000  | 9.808147000  |
| H  | -1.980288000 | 2.253494000  | 10.458426000 |
| H  | -2.624384000 | 3.167419000  | 9.087276000  |
| H  | -1.844414000 | 4.017368000  | 10.426506000 |
| C  | -0.312559000 | 1.406235000  | 7.792260000  |
| H  | 0.581984000  | 1.238886000  | 7.184486000  |
| H  | -1.150931000 | 1.577664000  | 7.106271000  |
| H  | -0.527722000 | 0.487023000  | 8.345614000  |
| C  | 0.057770000  | 4.395151000  | 7.701946000  |
| H  | 0.246165000  | 5.338243000  | 8.222654000  |
| H  | -0.851941000 | 4.508762000  | 7.101157000  |
| H  | 0.890358000  | 4.210249000  | 7.014821000  |
| C  | -1.639395000 | 7.209431000  | 9.917151000  |
| H  | -1.773182000 | 6.259577000  | 9.391944000  |
| H  | -1.682363000 | 8.010307000  | 9.175042000  |
| H  | -2.491134000 | 7.340412000  | 10.595706000 |
| C  | 0.082921000  | 8.959973000  | 11.728588000 |
| H  | 0.977219000  | 9.053196000  | 12.352850000 |
| H  | -0.795083000 | 9.142362000  | 12.359648000 |

|   |              |             |              |
|---|--------------|-------------|--------------|
| H | 0.115196000  | 9.755575000 | 10.977111000 |
| C | -0.309545000 | 5.999991000 | 12.344250000 |
| H | -0.404410000 | 4.967026000 | 11.985339000 |
| H | -1.256825000 | 6.241567000 | 12.839843000 |
| H | 0.482268000  | 6.041975000 | 13.098804000 |
| C | 0.635213000  | 8.650889000 | 7.757242000  |
| H | -0.038509000 | 7.909051000 | 7.317939000  |
| H | 1.099841000  | 9.207030000 | 6.934084000  |
| H | 0.034030000  | 9.363541000 | 8.330995000  |
| C | 3.081336000  | 6.886448000 | 7.542379000  |
| H | 3.851350000  | 6.286431000 | 8.035299000  |
| H | 3.576016000  | 7.586527000 | 6.859269000  |
| H | 2.458299000  | 6.217349000 | 6.940209000  |
| C | 3.041917000  | 9.292847000 | 9.470389000  |
| H | 2.445246000  | 9.912357000 | 10.147438000 |
| H | 3.378408000  | 9.932033000 | 8.645387000  |
| H | 3.929842000  | 8.963860000 | 10.016595000 |
| C | 3.951830000  | 3.065866000 | 7.559090000  |
| H | 3.039773000  | 2.742123000 | 8.069400000  |
| H | 4.301565000  | 2.241088000 | 6.927642000  |
| H | 3.695867000  | 3.903801000 | 6.902470000  |
| C | 6.697756000  | 4.331944000 | 7.719842000  |
| H | 6.376978000  | 5.245119000 | 7.209640000  |
| H | 6.976928000  | 3.602033000 | 6.950452000  |
| H | 7.601461000  | 4.559604000 | 8.294245000  |
| C | 6.057347000  | 2.021164000 | 9.570364000  |
| H | 6.860317000  | 2.285640000 | 10.266657000 |
| H | 6.487037000  | 1.373209000 | 8.797342000  |
| H | 5.317471000  | 1.434085000 | 10.121482000 |
| C | 6.401762000  | 7.218289000 | 9.580446000  |
| H | 5.631095000  | 7.669200000 | 8.950253000  |
| H | 7.181887000  | 6.822813000 | 8.924942000  |
| H | 6.851043000  | 8.016467000 | 10.183812000 |
| C | 7.213956000  | 5.114462000 | 11.602691000 |
| H | 6.929179000  | 4.323042000 | 12.301456000 |
| H | 7.770503000  | 5.879377000 | 12.157263000 |
| H | 7.901875000  | 4.678033000 | 10.870601000 |
| C | 4.687208000  | 6.822120000 | 12.052647000 |
| H | 3.804957000  | 7.316404000 | 11.626166000 |
| H | 5.311092000  | 7.616384000 | 12.477341000 |
| H | 4.358479000  | 6.192693000 | 12.886348000 |
| C | -0.477812000 | 3.063801000 | 14.578293000 |
| H | -0.025513000 | 3.666305000 | 13.787629000 |
| H | -0.018488000 | 2.071703000 | 14.501487000 |
| C | -1.988173000 | 2.972494000 | 14.379094000 |
| H | -2.211069000 | 2.605396000 | 13.371771000 |
| H | -2.475526000 | 3.946908000 | 14.481336000 |
| H | -2.457157000 | 2.281626000 | 15.085939000 |
| C | -0.746639000 | 2.723081000 | 17.452681000 |
| H | -0.805461000 | 1.722947000 | 17.007672000 |
| H | -0.097810000 | 2.631977000 | 18.325906000 |
| C | -2.135014000 | 3.174936000 | 17.905085000 |
| H | -2.558967000 | 2.439413000 | 18.598204000 |
| H | -2.100106000 | 4.132210000 | 18.433956000 |
| H | -2.835312000 | 3.280815000 | 17.073278000 |
| C | -0.668510000 | 5.442603000 | 16.322473000 |
| H | -0.467946000 | 5.959718000 | 15.379148000 |
| H | -1.753594000 | 5.347536000 | 16.426200000 |
| C | -0.041111000 | 6.183676000 | 17.497388000 |
| H | -0.367128000 | 5.741791000 | 18.447161000 |
| H | -0.331923000 | 7.239661000 | 17.513853000 |
| C | 2.265285000  | 6.266900000 | 19.255822000 |
| H | 1.838431000  | 5.389455000 | 19.753004000 |
| H | 3.353267000  | 6.155224000 | 19.337581000 |
| C | 1.806546000  | 7.545774000 | 19.954211000 |
| H | 0.727830000  | 7.702876000 | 19.851872000 |
| H | 2.310852000  | 8.433206000 | 19.561773000 |
| H | 2.026400000  | 7.497716000 | 21.026899000 |
| C | 2.289960000  | 7.728359000 | 16.768167000 |
| H | 1.779130000  | 8.475354000 | 17.385849000 |

|   |             |              |               |
|---|-------------|--------------|---------------|
| H | 3.363432000 | 7.864331000  | 16.931710000  |
| C | 1.945047000 | 7.932122000  | 15.297502000  |
| H | 2.385089000 | 7.151589000  | 14.670632000  |
| H | 2.311041000 | 8.901540000  | 14.942162000  |
| H | 0.863193000 | 7.918089000  | 15.132189000  |
| C | 5.714193000 | 3.985926000  | 14.935505000  |
| H | 5.350929000 | 4.602227000  | 14.108551000  |
| H | 6.746194000 | 4.298417000  | 15.136509000  |
| C | 5.666638000 | 2.513475000  | 14.542837000  |
| H | 6.166475000 | 2.358873000  | 13.581164000  |
| H | 6.178672000 | 1.882530000  | 15.276261000  |
| H | 4.636731000 | 2.162211000  | 14.439523000  |
| C | 5.566251000 | 6.065280000  | 16.887803000  |
| H | 5.012994000 | 6.500647000  | 17.726993000  |
| H | 6.549691000 | 5.774528000  | 17.278349000  |
| C | 5.736593000 | 7.082504000  | 15.762685000  |
| H | 6.160393000 | 8.015953000  | 16.149150000  |
| H | 6.414979000 | 6.713717000  | 14.988885000  |
| H | 4.788756000 | 7.323995000  | 15.275218000  |
| C | 5.400620000 | 3.368736000  | 17.771700000  |
| H | 6.473548000 | 3.224524000  | 17.596926000  |
| H | 5.295342000 | 3.924165000  | 18.7111734000 |
| C | 4.634309000 | 2.058508000  | 17.832734000  |
| H | 4.833047000 | 1.507465000  | 18.758650000  |
| H | 4.908963000 | 1.408235000  | 16.998412000  |
| C | 2.178394000 | 0.670045000  | 17.301654000  |
| H | 2.664215000 | -0.012575000 | 18.007788000  |
| H | 1.108223000 | 0.648680000  | 17.530398000  |
| C | 2.422943000 | 0.219001000  | 15.866493000  |
| H | 2.004486000 | 0.930610000  | 15.149607000  |
| H | 1.970625000 | -0.761931000 | 15.683880000  |
| H | 3.491020000 | 0.131125000  | 15.644878000  |
| C | 2.376139000 | 2.564376000  | 19.511207000  |
| H | 3.088222000 | 3.313463000  | 19.878536000  |
| H | 1.391856000 | 3.037881000  | 19.584437000  |
| C | 2.423632000 | 1.313237000  | 20.385385000  |
| H | 1.646979000 | 0.593553000  | 20.110394000  |
| H | 2.267818000 | 1.573662000  | 21.438607000  |
| H | 3.388233000 | 0.798669000  | 20.321737000  |

**1-Dy, S=5/2, large core**

|    |              |              |              |
|----|--------------|--------------|--------------|
| Dy | 2.338810000  | 13.436832000 | 10.834398000 |
| Fe | 1.973273000  | 14.199570000 | 16.191852000 |
| P  | -0.287447000 | 14.393135000 | 16.020532000 |
| P  | 1.754702000  | 16.058528000 | 17.478305000 |
| P  | 2.014839000  | 12.312756000 | 17.407607000 |
| P  | 4.237266000  | 14.120885000 | 16.372930000 |
| Si | 1.896286000  | 10.285682000 | 9.060513000  |
| Si | -0.309899000 | 11.203125000 | 10.884427000 |
| Si | 0.072906000  | 15.284525000 | 8.693902000  |
| Si | 1.820206000  | 16.853338000 | 10.587781000 |
| Si | 5.526463000  | 12.166014000 | 11.142878000 |
| Si | 5.360919000  | 14.311408000 | 9.021495000  |
| N  | 2.181369000  | 13.765738000 | 13.338660000 |
| N  | 2.103957000  | 13.989000000 | 14.474850000 |
| N  | 1.266433000  | 11.509538000 | 10.173609000 |
| N  | 1.332338000  | 15.291456000 | 9.937283000  |
| N  | 4.554890000  | 13.333312000 | 10.257692000 |
| C  | 2.756345000  | 8.849468000  | 9.970619000  |
| H  | 3.591518000  | 9.183969000  | 10.591351000 |
| H  | 3.148699000  | 8.123953000  | 9.248133000  |
| H  | 2.050331000  | 8.321963000  | 10.620034000 |
| C  | 3.119588000  | 11.053918000 | 7.832627000  |
| H  | 2.589921000  | 11.698665000 | 7.123730000  |
| H  | 3.622116000  | 10.267438000 | 7.257904000  |
| H  | 3.882261000  | 11.652968000 | 8.336872000  |
| C  | 0.568767000  | 9.452230000  | 7.974059000  |
| H  | -0.134701000 | 8.837374000  | 8.544310000  |
| H  | 1.075768000  | 8.789414000  | 7.262349000  |
| H  | -0.004289000 | 10.182917000 | 7.395314000  |



|   |              |              |              |
|---|--------------|--------------|--------------|
| C | -0.424366000 | 9.543736000  | 11.812854000 |
| H | -0.382708000 | 8.692374000  | 11.125727000 |
| H | -1.372005000 | 9.475974000  | 12.360458000 |
| H | 0.394336000  | 9.434754000  | 12.530739000 |
| C | -0.662455000 | 12.561153000 | 12.174864000 |
| H | -0.014323000 | 12.468688000 | 13.050804000 |
| H | -1.700873000 | 12.471814000 | 12.513202000 |
| H | -0.553514000 | 13.572114000 | 11.761678000 |
| C | -1.795309000 | 11.250575000 | 9.694411000  |
| H | -1.800774000 | 12.156346000 | 9.082167000  |
| H | -2.724238000 | 11.234946000 | 10.277543000 |
| H | -1.815388000 | 10.391125000 | 9.020080000  |
| C | -1.679655000 | 15.261474000 | 9.442890000  |
| H | -1.861584000 | 14.374370000 | 10.055753000 |
| H | -2.433391000 | 15.274328000 | 8.646714000  |
| H | -1.845734000 | 16.142113000 | 10.072028000 |
| C | 0.093358000  | 16.795211000 | 7.531211000  |
| H | -0.129572000 | 17.738573000 | 8.039143000  |
| H | -0.678182000 | 16.647088000 | 6.765937000  |
| H | 1.053326000  | 16.900474000 | 7.016926000  |
| C | 0.264030000  | 13.785601000 | 7.548679000  |
| H | 1.157295000  | 13.897640000 | 6.925269000  |
| H | -0.601677000 | 13.706315000 | 6.881038000  |
| H | 0.353367000  | 12.851467000 | 8.109808000  |
| C | 0.366134000  | 17.849207000 | 11.313808000 |
| H | -0.346059000 | 18.155525000 | 10.540816000 |
| H | 0.732044000  | 18.759495000 | 11.803352000 |
| H | -0.178943000 | 17.258510000 | 12.056922000 |
| C | 3.051733000  | 16.600435000 | 12.019866000 |
| H | 2.563397000  | 16.216882000 | 12.918724000 |
| H | 3.497873000  | 17.571544000 | 12.264235000 |
| H | 3.881911000  | 15.929708000 | 11.767124000 |
| C | 2.711992000  | 18.018225000 | 9.373271000  |
| H | 3.562664000  | 17.529708000 | 8.890177000  |
| H | 3.095601000  | 18.883428000 | 9.927771000  |
| H | 2.052465000  | 18.395794000 | 8.588536000  |
| C | 4.446715000  | 11.388259000 | 12.512885000 |
| H | 4.143221000  | 12.110670000 | 13.275723000 |
| H | 5.024612000  | 10.601413000 | 13.011750000 |
| H | 3.541249000  | 10.909817000 | 12.119571000 |
| C | 7.048259000  | 12.937179000 | 11.993627000 |
| H | 7.793288000  | 13.252222000 | 11.255489000 |
| H | 7.531119000  | 12.205785000 | 12.652750000 |
| H | 6.782404000  | 13.813489000 | 12.591221000 |
| C | 6.202493000  | 10.696127000 | 10.139661000 |
| H | 6.601217000  | 9.942523000  | 10.829741000 |
| H | 7.015383000  | 10.993990000 | 9.472620000  |
| H | 5.429915000  | 10.217278000 | 9.533259000  |
| C | 6.167710000  | 15.877407000 | 9.746791000  |
| H | 5.436671000  | 16.551928000 | 10.200773000 |
| H | 6.687972000  | 16.433716000 | 8.958100000  |
| H | 6.905886000  | 15.618281000 | 10.512858000 |
| C | 6.763844000  | 13.407510000 | 8.099995000  |
| H | 7.614936000  | 13.160778000 | 8.742369000  |
| H | 7.135486000  | 14.067748000 | 7.307074000  |
| H | 6.413210000  | 12.485830000 | 7.625949000  |
| C | 4.136020000  | 14.832374000 | 7.670729000  |
| H | 3.857330000  | 13.969525000 | 7.057246000  |
| H | 4.595796000  | 15.577028000 | 7.010737000  |
| H | 3.222436000  | 15.262524000 | 8.090322000  |
| C | -2.124857000 | 12.462431000 | 17.185569000 |
| H | -2.770893000 | 11.598820000 | 16.993604000 |
| H | -2.734658000 | 13.220080000 | 17.686393000 |
| H | -1.353930000 | 12.139639000 | 17.891623000 |
| C | -1.536590000 | 12.985330000 | 15.877213000 |
| H | -2.345406000 | 13.333594000 | 15.227140000 |
| H | -1.027492000 | 12.185464000 | 15.332109000 |
| C | -2.181930000 | 16.048576000 | 14.523681000 |
| H | -2.359724000 | 16.556786000 | 13.570069000 |
| H | -2.319193000 | 16.791374000 | 15.316127000 |

|   |              |              |              |
|---|--------------|--------------|--------------|
| H | -2.968878000 | 15.295523000 | 14.635925000 |
| C | -0.781688000 | 15.442160000 | 14.541314000 |
| H | -0.017806000 | 16.221920000 | 14.467806000 |
| H | -0.630677000 | 14.794497000 | 13.672803000 |
| C | -0.947995000 | 15.406768000 | 17.447841000 |
| H | -2.000173000 | 15.673493000 | 17.300892000 |
| H | -0.883988000 | 14.782706000 | 18.345479000 |
| C | -0.047005000 | 16.626128000 | 17.570345000 |
| H | -0.226799000 | 17.184118000 | 18.495284000 |
| H | -0.223326000 | 17.313266000 | 16.736974000 |
| C | 2.103470000  | 15.970693000 | 19.343594000 |
| H | 1.318969000  | 15.303236000 | 19.719857000 |
| H | 3.042960000  | 15.426479000 | 19.465655000 |
| C | 2.137981000  | 17.261992000 | 20.158312000 |
| H | 1.236366000  | 17.868298000 | 20.020384000 |
| H | 2.998540000  | 17.885433000 | 19.898532000 |
| H | 2.212483000  | 17.036989000 | 21.228432000 |
| C | 2.584060000  | 17.694306000 | 17.032867000 |
| H | 2.311813000  | 18.445969000 | 17.781353000 |
| H | 3.664011000  | 17.531289000 | 17.121095000 |
| C | 2.246283000  | 18.190756000 | 15.631445000 |
| H | 2.398627000  | 17.405665000 | 14.885578000 |
| H | 2.874567000  | 19.045551000 | 15.359121000 |
| H | 1.205502000  | 18.521596000 | 15.556536000 |
| C | 1.706138000  | 10.396925000 | 15.313454000 |
| H | 1.549911000  | 11.227794000 | 14.620612000 |
| H | 1.170924000  | 9.523501000  | 14.926505000 |
| H | 2.773362000  | 10.154369000 | 15.297397000 |
| C | 1.229215000  | 10.742796000 | 16.719419000 |
| H | 1.445968000  | 9.919171000  | 17.408734000 |
| H | 0.145059000  | 10.888820000 | 16.730121000 |
| C | 1.535499000  | 10.894103000 | 19.953179000 |
| H | 0.851666000  | 10.144527000 | 19.544857000 |
| H | 1.276959000  | 11.024546000 | 21.010272000 |
| H | 2.547034000  | 10.476673000 | 19.916360000 |
| C | 1.439680000  | 12.224655000 | 19.208972000 |
| H | 2.039463000  | 12.988427000 | 19.717064000 |
| H | 0.409079000  | 12.598231000 | 19.223838000 |
| C | 3.800105000  | 11.700385000 | 17.613297000 |
| H | 4.144465000  | 12.016838000 | 18.605055000 |
| H | 3.828238000  | 10.605662000 | 17.597931000 |
| C | 4.678103000  | 12.305579000 | 16.525513000 |
| H | 4.459414000  | 11.858579000 | 15.550918000 |
| H | 5.746141000  | 12.162736000 | 16.722619000 |
| C | 5.325148000  | 14.663521000 | 14.952206000 |
| H | 6.290598000  | 14.155735000 | 15.052961000 |
| H | 4.851819000  | 14.271570000 | 14.047697000 |
| C | 5.514034000  | 16.172600000 | 14.829426000 |
| H | 6.129268000  | 16.408405000 | 13.955301000 |
| H | 6.013555000  | 16.599101000 | 15.705735000 |
| H | 4.557131000  | 16.683244000 | 14.700980000 |
| C | 5.164177000  | 14.826506000 | 17.855240000 |
| H | 4.932790000  | 15.895698000 | 17.896971000 |
| H | 4.691609000  | 14.379964000 | 18.736574000 |
| C | 6.675633000  | 14.612453000 | 17.909991000 |
| H | 7.189461000  | 15.073432000 | 17.061969000 |
| H | 6.941658000  | 13.551426000 | 17.922627000 |
| H | 7.087953000  | 15.058529000 | 18.821929000 |

**1-Ce, S=1/2, large core+disp**

|    |              |              |              |
|----|--------------|--------------|--------------|
| Ce | 9.280857000  | 8.085154000  | 15.776733000 |
| Fe | 8.832558000  | 6.482679000  | 10.656385000 |
| P  | 6.614763000  | 6.356149000  | 10.691902000 |
| P  | 8.694247000  | 4.451326000  | 9.787519000  |
| P  | 11.060926000 | 6.517449000  | 10.643499000 |
| P  | 8.978609000  | 8.039366000  | 9.116384000  |
| Si | 6.608122000  | 10.263683000 | 15.551886000 |
| Si | 8.852959000  | 11.215072000 | 17.460928000 |
| Si | 7.501432000  | 6.468868000  | 18.613004000 |
| Si | 8.754160000  | 4.738929000  | 16.498598000 |

|    |              |              |              |
|----|--------------|--------------|--------------|
| Si | 12.790737000 | 7.532751000  | 16.699507000 |
| Si | 12.171874000 | 9.761759000  | 14.740626000 |
| N  | 8.866568000  | 7.450113000  | 13.350763000 |
| N  | 8.852158000  | 7.013306000  | 12.277357000 |
| N  | 8.147990000  | 10.101559000 | 16.328623000 |
| N  | 8.376511000  | 6.322370000  | 17.107036000 |
| N  | 11.657264000 | 8.407668000  | 15.705844000 |
| C  | 6.095247000  | 8.517917000  | 14.974631000 |
| H  | 6.677889000  | 8.204322000  | 14.101686000 |
| H  | 5.043286000  | 8.518220000  | 14.671457000 |
| H  | 6.207921000  | 7.763279000  | 15.761551000 |
| C  | 6.714491000  | 11.342607000 | 13.996303000 |
| H  | 7.490175000  | 10.954792000 | 13.329721000 |
| H  | 6.987407000  | 12.370143000 | 14.258254000 |
| H  | 5.767709000  | 11.370326000 | 13.445558000 |
| C  | 5.207168000  | 10.946513000 | 16.625918000 |
| H  | 5.344744000  | 12.013453000 | 16.823987000 |
| H  | 5.147276000  | 10.426625000 | 17.584916000 |
| H  | 4.249642000  | 10.825711000 | 16.106652000 |
| C  | 9.539776000  | 12.760938000 | 16.605347000 |
| H  | 8.709868000  | 13.349538000 | 16.198352000 |
| H  | 10.202340000 | 12.502558000 | 15.776235000 |
| H  | 10.094362000 | 13.400850000 | 17.300318000 |
| C  | 7.676804000  | 11.830471000 | 18.816144000 |
| H  | 7.166261000  | 11.000873000 | 19.312878000 |
| H  | 6.915666000  | 12.510327000 | 18.424103000 |
| H  | 8.252125000  | 12.375890000 | 19.573156000 |
| C  | 10.230600000 | 10.269179000 | 18.365562000 |
| H  | 10.961987000 | 9.823615000  | 17.682479000 |
| H  | 9.786603000  | 9.467802000  | 18.969498000 |
| H  | 10.778334000 | 10.925829000 | 19.049722000 |
| C  | 6.513255000  | 8.080171000  | 18.674473000 |
| H  | 5.612821000  | 8.002202000  | 18.056850000 |
| H  | 7.095167000  | 8.925022000  | 18.298054000 |
| H  | 6.199770000  | 8.297380000  | 19.701329000 |
| C  | 6.227836000  | 5.082716000  | 18.881622000 |
| H  | 6.676066000  | 4.086052000  | 18.924376000 |
| H  | 5.484043000  | 5.085805000  | 18.078122000 |
| H  | 5.698606000  | 5.249360000  | 19.826672000 |
| C  | 8.692126000  | 6.464292000  | 20.088304000 |
| H  | 9.368636000  | 7.323611000  | 20.039206000 |
| H  | 9.309728000  | 5.561271000  | 20.092299000 |
| H  | 8.150134000  | 6.515353000  | 21.039125000 |
| C  | 9.484370000  | 3.556955000  | 17.790692000 |
| H  | 8.799611000  | 3.377987000  | 18.624225000 |
| H  | 10.410784000 | 3.969479000  | 18.201881000 |
| H  | 9.717458000  | 2.587947000  | 17.334954000 |
| C  | 10.077142000 | 4.906890000  | 15.145080000 |
| H  | 10.935751000 | 5.512525000  | 15.451557000 |
| H  | 9.676633000  | 5.322223000  | 14.216620000 |
| H  | 10.465074000 | 3.910028000  | 14.913837000 |
| C  | 7.276153000  | 3.898234000  | 15.656393000 |
| H  | 6.846735000  | 4.583151000  | 14.918074000 |
| H  | 6.491967000  | 3.639041000  | 16.372522000 |
| H  | 7.582816000  | 2.982888000  | 15.137627000 |
| C  | 11.864329000 | 6.755314000  | 18.158745000 |
| H  | 10.913975000 | 6.292618000  | 17.873100000 |
| H  | 11.637254000 | 7.522193000  | 18.906227000 |
| H  | 12.475644000 | 5.987294000  | 18.644967000 |
| C  | 14.154092000 | 8.621196000  | 17.446570000 |
| H  | 13.727728000 | 9.462984000  | 17.999956000 |
| H  | 14.825845000 | 9.022108000  | 16.680878000 |
| H  | 14.759857000 | 8.029586000  | 18.142275000 |
| C  | 13.683906000 | 6.157654000  | 15.737334000 |
| H  | 14.078600000 | 6.547337000  | 14.793679000 |
| H  | 13.011305000 | 5.327457000  | 15.505850000 |
| H  | 14.521524000 | 5.755764000  | 16.318113000 |
| C  | 13.564019000 | 9.351961000  | 13.515326000 |
| H  | 13.244075000 | 8.606999000  | 12.784076000 |
| H  | 14.444003000 | 8.959377000  | 14.035102000 |

|   |              |              |              |
|---|--------------|--------------|--------------|
| H | 13.871464000 | 10.253065000 | 12.972638000 |
| C | 10.683956000 | 10.339557000 | 13.708681000 |
| H | 9.842915000  | 10.678501000 | 14.326190000 |
| H | 10.324224000 | 9.541683000  | 13.051384000 |
| H | 10.975098000 | 11.184908000 | 13.076210000 |
| C | 12.789746000 | 11.257260000 | 15.732269000 |
| H | 13.803476000 | 11.092248000 | 16.106508000 |
| H | 12.146557000 | 11.471846000 | 16.588245000 |
| H | 12.809896000 | 12.148596000 | 15.094830000 |
| C | 4.515575000  | 5.388018000  | 12.451625000 |
| H | 4.189568000  | 4.628775000  | 11.733677000 |
| H | 3.899282000  | 6.278849000  | 12.298099000 |
| H | 4.293784000  | 5.006713000  | 13.453509000 |
| C | 6.000165000  | 5.695212000  | 12.323074000 |
| H | 6.610751000  | 4.807549000  | 12.513278000 |
| H | 6.312420000  | 6.426365000  | 13.073389000 |
| C | 5.411958000  | 7.734710000  | 10.335228000 |
| H | 5.685743000  | 8.131190000  | 9.351889000  |
| H | 4.415245000  | 7.292307000  | 10.227559000 |
| C | 5.412047000  | 8.822393000  | 11.401653000 |
| H | 4.840018000  | 9.697526000  | 11.078222000 |
| H | 6.423652000  | 9.154753000  | 11.642400000 |
| H | 4.965454000  | 8.460628000  | 12.330053000 |
| C | 6.023966000  | 5.071841000  | 9.476307000  |
| H | 4.959817000  | 4.853357000  | 9.610740000  |
| H | 6.154045000  | 5.508692000  | 8.479605000  |
| C | 6.910062000  | 3.854071000  | 9.660355000  |
| H | 6.806563000  | 3.127741000  | 8.848521000  |
| H | 6.658813000  | 3.341705000  | 10.592986000 |
| C | 9.444887000  | 3.006313000  | 10.715924000 |
| H | 9.218111000  | 2.070193000  | 10.196281000 |
| H | 10.530736000 | 3.140407000  | 10.689815000 |
| C | 8.950802000  | 2.970170000  | 12.157298000 |
| H | 7.914190000  | 2.625440000  | 12.219913000 |
| H | 8.991406000  | 3.968302000  | 12.603603000 |
| H | 9.553919000  | 2.293346000  | 12.770305000 |
| C | 9.203647000  | 4.118668000  | 8.002465000  |
| H | 8.415158000  | 4.606553000  | 7.417181000  |
| H | 10.115561000 | 4.685885000  | 7.810983000  |
| C | 9.378434000  | 2.667455000  | 7.573179000  |
| H | 9.549924000  | 2.598400000  | 6.493504000  |
| H | 8.495335000  | 2.061716000  | 7.801487000  |
| H | 10.234486000 | 2.203206000  | 8.071318000  |
| C | 12.038404000 | 6.196799000  | 12.192332000 |
| H | 13.023093000 | 6.658308000  | 12.071847000 |
| H | 11.540067000 | 6.723532000  | 13.012046000 |
| C | 12.178363000 | 4.713708000  | 12.506154000 |
| H | 12.708156000 | 4.177305000  | 11.712533000 |
| H | 11.202652000 | 4.247185000  | 12.639867000 |
| H | 12.741809000 | 4.574490000  | 13.431592000 |
| C | 12.043340000 | 5.554127000  | 9.372407000  |
| H | 11.793780000 | 4.497098000  | 9.503371000  |
| H | 11.628528000 | 5.846844000  | 8.403200000  |
| C | 13.554016000 | 5.755701000  | 9.381177000  |
| H | 14.023964000 | 5.159679000  | 8.591851000  |
| H | 14.002280000 | 5.453223000  | 10.331026000 |
| H | 13.825079000 | 6.800215000  | 9.204644000  |
| C | 11.537916000 | 8.260754000  | 10.179883000 |
| H | 11.220840000 | 8.892606000  | 11.014345000 |
| H | 12.620398000 | 8.374897000  | 10.068249000 |
| C | 10.773223000 | 8.600247000  | 8.906658000  |
| H | 11.196676000 | 8.065661000  | 8.049027000  |
| H | 10.810067000 | 9.668858000  | 8.674042000  |
| C | 8.467110000  | 7.727267000  | 7.340130000  |
| H | 9.036290000  | 6.838287000  | 7.048626000  |
| H | 7.417717000  | 7.410913000  | 7.385847000  |
| C | 8.656114000  | 8.850922000  | 6.327967000  |
| H | 8.418870000  | 8.509054000  | 5.314692000  |
| H | 9.689248000  | 9.212528000  | 6.317791000  |
| H | 8.007873000  | 9.704599000  | 6.543158000  |

|   |             |              |              |
|---|-------------|--------------|--------------|
| C | 8.197373000 | 9.713549000  | 9.432848000  |
| H | 8.447612000 | 10.382468000 | 8.602712000  |
| H | 7.113226000 | 9.582661000  | 9.426757000  |
| C | 8.661721000 | 10.301046000 | 10.757473000 |
| H | 9.716745000 | 10.585966000 | 10.720729000 |
| H | 8.550409000 | 9.576629000  | 11.568631000 |
| H | 8.091429000 | 11.197144000 | 11.019023000 |

**1-Sm, S=5/2, large core+disp**

|    |              |              |              |
|----|--------------|--------------|--------------|
| Sm | 2.431302000  | 4.764492000  | 10.886960000 |
| Fe | 2.470554000  | 4.165903000  | 16.183723000 |
| P  | 0.290704000  | 3.710559000  | 16.007986000 |
| P  | 1.850968000  | 5.949381000  | 17.297426000 |
| P  | 4.661433000  | 4.524843000  | 16.343944000 |
| P  | 2.844448000  | 2.471596000  | 17.549062000 |
| Si | 1.607925000  | 1.375759000  | 10.863522000 |
| Si | -0.157498000 | 3.044018000  | 9.079710000  |
| Si | 0.032289000  | 7.201327000  | 11.049059000 |
| Si | 2.091157000  | 7.797568000  | 8.917148000  |
| Si | 5.207116000  | 3.512716000  | 8.973648000  |
| Si | 5.635148000  | 5.883234000  | 10.843722000 |
| N  | 2.600088000  | 4.554326000  | 13.350285000 |
| N  | 2.559671000  | 4.345298000  | 14.487944000 |
| N  | 1.175188000  | 2.934708000  | 10.210313000 |
| N  | 1.474117000  | 6.761178000  | 10.186180000 |
| N  | 4.606782000  | 4.667760000  | 10.141678000 |
| C  | 2.405485000  | 0.178024000  | 9.628207000  |
| H  | 1.732596000  | -0.078867000 | 8.807206000  |
| H  | 2.676394000  | -0.750268000 | 10.144804000 |
| H  | 3.316572000  | 0.599758000  | 9.197369000  |
| C  | 0.128910000  | 0.463076000  | 11.629968000 |
| H  | -0.403642000 | 1.106499000  | 12.334491000 |
| H  | 0.460918000  | -0.433118000 | 12.166234000 |
| H  | -0.584554000 | 0.146220000  | 10.862928000 |
| C  | 2.891923000  | 1.609323000  | 12.240743000 |
| H  | 3.738443000  | 2.233741000  | 11.933149000 |
| H  | 3.306552000  | 0.632106000  | 12.511729000 |
| H  | 2.459881000  | 2.053010000  | 13.139234000 |
| C  | -1.814017000 | 3.242706000  | 9.987077000  |
| H  | -2.010243000 | 2.357688000  | 10.601250000 |
| H  | -2.644115000 | 3.352567000  | 9.280484000  |
| H  | -1.815985000 | 4.116712000  | 10.643887000 |
| C  | -0.341556000 | 1.524175000  | 7.956286000  |
| H  | 0.564968000  | 1.366350000  | 7.364174000  |
| H  | -1.171754000 | 1.690308000  | 7.260324000  |
| H  | -0.553264000 | 0.604972000  | 8.510412000  |
| C  | 0.101490000  | 4.508615000  | 7.912503000  |
| H  | 0.326828000  | 5.428489000  | 8.458412000  |
| H  | -0.789530000 | 4.678708000  | 7.298566000  |
| H  | 0.939452000  | 4.296101000  | 7.240542000  |
| C  | -1.568095000 | 7.175510000  | 10.033893000 |
| H  | -1.675669000 | 6.230128000  | 9.495942000  |
| H  | -1.602080000 | 7.984581000  | 9.300803000  |
| H  | -2.432522000 | 7.286957000  | 10.698709000 |
| C  | 0.162622000  | 8.897419000  | 11.886060000 |
| H  | 1.086649000  | 8.965257000  | 12.467648000 |
| H  | -0.684091000 | 9.081983000  | 12.556690000 |
| H  | 0.177000000  | 9.698614000  | 11.140004000 |
| C  | -0.232463000 | 5.911689000  | 12.424171000 |
| H  | -0.302989000 | 4.891892000  | 12.025095000 |
| H  | -1.185815000 | 6.110902000  | 12.924642000 |
| H  | 0.557149000  | 5.941594000  | 13.179689000 |
| C  | 0.718433000  | 8.603451000  | 7.882031000  |
| H  | 0.040818000  | 7.850394000  | 7.469168000  |
| H  | 1.166072000  | 9.151162000  | 7.044997000  |
| H  | 0.125988000  | 9.317013000  | 8.463616000  |
| C  | 3.143358000  | 6.784142000  | 7.715072000  |
| H  | 3.867179000  | 6.159243000  | 8.245067000  |
| H  | 3.690483000  | 7.440703000  | 7.029947000  |
| H  | 2.500878000  | 6.131425000  | 7.116462000  |

|   |              |             |              |
|---|--------------|-------------|--------------|
| C | 3.129999000  | 9.229401000 | 9.606605000  |
| H | 2.527427000  | 9.845363000 | 10.281574000 |
| H | 3.487443000  | 9.871348000 | 8.793548000  |
| H | 4.001828000  | 8.878902000 | 10.163364000 |
| C | 3.800878000  | 3.021395000 | 7.805232000  |
| H | 2.888756000  | 2.767523000 | 8.353639000  |
| H | 4.080209000  | 2.158988000 | 7.190577000  |
| H | 3.573800000  | 3.856090000 | 7.134598000  |
| C | 6.599494000  | 4.200849000 | 7.883791000  |
| H | 6.276399000  | 5.103015000 | 7.356113000  |
| H | 6.880876000  | 3.453184000 | 7.133664000  |
| H | 7.496959000  | 4.443946000 | 8.461325000  |
| C | 5.907151000  | 1.972912000 | 9.832912000  |
| H | 6.726778000  | 2.261201000 | 10.499801000 |
| H | 6.300063000  | 1.254048000 | 9.105387000  |
| H | 5.150173000  | 1.463072000 | 10.434082000 |
| C | 6.324111000  | 7.168634000 | 9.632493000  |
| H | 5.540931000  | 7.588201000 | 8.997801000  |
| H | 7.088498000  | 6.735474000 | 8.982673000  |
| H | 6.785576000  | 7.992395000 | 10.189328000 |
| C | 7.137536000  | 5.136538000 | 11.731815000 |
| H | 6.843235000  | 4.313838000 | 12.387138000 |
| H | 7.667087000  | 5.886530000 | 12.330300000 |
| H | 7.846116000  | 4.738031000 | 10.997907000 |
| C | 4.599524000  | 6.859525000 | 12.113433000 |
| H | 3.682430000  | 7.274345000 | 11.675932000 |
| H | 5.184891000  | 7.711398000 | 12.474458000 |
| H | 4.318344000  | 6.263445000 | 12.985186000 |
| C | -0.278280000 | 2.998255000 | 14.388486000 |
| H | 0.272932000  | 3.535787000 | 13.616293000 |
| H | 0.110341000  | 1.974736000 | 14.376716000 |
| C | -1.770891000 | 3.018053000 | 14.088797000 |
| H | -1.955256000 | 2.668638000 | 13.068453000 |
| H | -2.183045000 | 4.028276000 | 14.159878000 |
| H | -2.334055000 | 2.369797000 | 14.765815000 |
| C | -0.622580000 | 2.610050000 | 17.235568000 |
| H | -0.636490000 | 1.616512000 | 16.774572000 |
| H | 0.003536000  | 2.530438000 | 18.125431000 |
| C | -2.032544000 | 3.022785000 | 17.644885000 |
| H | -2.466360000 | 2.269561000 | 18.311255000 |
| H | -2.033046000 | 3.973456000 | 18.185876000 |
| H | -2.701200000 | 3.128539000 | 16.787917000 |
| C | -0.613561000 | 5.335459000 | 16.168958000 |
| H | -0.404588000 | 5.882171000 | 15.246323000 |
| H | -1.695823000 | 5.202648000 | 16.242631000 |
| C | -0.030321000 | 6.053522000 | 17.378176000 |
| H | -0.338255000 | 5.556409000 | 18.306218000 |
| H | -0.359676000 | 7.095794000 | 17.435448000 |
| C | 2.293798000  | 6.238812000 | 19.098188000 |
| H | 1.856071000  | 5.386438000 | 19.626796000 |
| H | 3.380080000  | 6.110659000 | 19.170479000 |
| C | 1.855877000  | 7.551548000 | 19.737381000 |
| H | 0.778882000  | 7.712932000 | 19.626645000 |
| H | 2.367750000  | 8.409591000 | 19.293632000 |
| H | 2.078849000  | 7.556663000 | 20.809811000 |
| C | 2.235257000  | 7.636285000 | 16.572347000 |
| H | 1.673390000  | 8.392477000 | 17.130671000 |
| H | 3.295498000  | 7.827810000 | 16.757223000 |
| C | 1.925888000  | 7.723016000 | 15.084197000 |
| H | 2.392697000  | 6.904624000 | 14.531210000 |
| H | 2.284074000  | 8.667356000 | 14.662409000 |
| H | 0.850008000  | 7.674244000 | 14.895062000 |
| C | 5.651779000  | 4.063763000 | 14.833780000 |
| H | 5.283004000  | 4.711252000 | 14.034573000 |
| H | 6.699172000  | 4.334990000 | 15.008627000 |
| C | 5.513321000  | 2.606938000 | 14.417716000 |
| H | 5.926547000  | 2.448623000 | 13.417022000 |
| H | 6.046012000  | 1.940310000 | 15.102597000 |
| H | 4.462038000  | 2.312338000 | 14.392133000 |
| C | 5.479332000  | 6.158760000 | 16.758933000 |

|   |             |              |              |
|---|-------------|--------------|--------------|
| H | 4.917292000 | 6.593197000  | 17.591896000 |
| H | 6.481807000 | 5.928389000  | 17.139192000 |
| C | 5.568824000 | 7.128244000  | 15.586390000 |
| H | 5.916026000 | 8.112142000  | 15.918098000 |
| H | 6.269375000 | 6.770001000  | 14.828236000 |
| H | 4.604292000 | 7.262684000  | 15.093123000 |
| C | 5.417097000 | 3.466590000  | 17.691073000 |
| H | 6.492908000 | 3.352057000  | 17.518489000 |
| H | 5.288661000 | 4.026450000  | 18.625183000 |
| C | 4.680504000 | 2.141633000  | 17.754307000 |
| H | 4.873781000 | 1.600124000  | 18.686101000 |
| H | 4.974107000 | 1.493193000  | 16.925721000 |
| C | 2.269304000 | 0.725564000  | 17.171192000 |
| H | 2.801185000 | 0.036631000  | 17.836039000 |
| H | 1.208943000 | 0.659834000  | 17.428136000 |
| C | 2.490888000 | 0.360985000  | 15.710971000 |
| H | 2.027364000 | 1.098315000  | 15.051985000 |
| H | 2.075435000 | -0.625051000 | 15.479351000 |
| H | 3.554652000 | 0.340521000  | 15.456996000 |
| C | 2.378958000 | 2.640563000  | 19.370352000 |
| H | 3.084046000 | 3.388816000  | 19.751026000 |
| H | 1.394921000 | 3.118493000  | 19.406577000 |
| C | 2.399796000 | 1.386423000  | 20.234961000 |
| H | 1.634693000 | 0.670081000  | 19.922394000 |
| H | 2.210632000 | 1.632405000  | 21.285497000 |
| H | 3.367144000 | 0.875767000  | 20.190474000 |

**1-Dy, S=5/2, large core+disp**

|    |              |              |              |
|----|--------------|--------------|--------------|
| Dy | 2.326822000  | 13.416576000 | 10.914624000 |
| Fe | 1.996123000  | 14.190170000 | 16.103316000 |
| P  | -0.206143000 | 14.389244000 | 15.897993000 |
| P  | 1.799365000  | 16.001327000 | 17.356664000 |
| P  | 1.996615000  | 12.360853000 | 17.308107000 |
| P  | 4.210838000  | 14.093735000 | 16.260858000 |
| Si | 1.945747000  | 10.322121000 | 9.180592000  |
| Si | -0.301603000 | 11.261777000 | 10.960404000 |
| Si | 0.040180000  | 15.231249000 | 8.877016000  |
| Si | 1.843219000  | 16.767213000 | 10.763348000 |
| Si | 5.467179000  | 12.193176000 | 11.246370000 |
| Si | 5.264818000  | 14.364120000 | 9.143577000  |
| N  | 2.178783000  | 13.682848000 | 13.292846000 |
| N  | 2.118803000  | 13.947051000 | 14.419131000 |
| N  | 1.274674000  | 11.519432000 | 10.268865000 |
| N  | 1.302013000  | 15.251241000 | 10.091683000 |
| N  | 4.516877000  | 13.361102000 | 10.371068000 |
| C  | 2.803103000  | 8.919895000  | 10.129745000 |
| H  | 3.598770000  | 9.289274000  | 10.780741000 |
| H  | 3.244088000  | 8.191541000  | 9.439966000  |
| H  | 2.077035000  | 8.393081000  | 10.757109000 |
| C  | 3.174036000  | 11.144677000 | 8.001706000  |
| H  | 2.634807000  | 11.785606000 | 7.297067000  |
| H  | 3.725001000  | 10.394307000 | 7.424667000  |
| H  | 3.894180000  | 11.762452000 | 8.543920000  |
| C  | 0.640633000  | 9.489622000  | 8.081133000  |
| H  | -0.070804000 | 8.888088000  | 8.655493000  |
| H  | 1.140543000  | 8.820674000  | 7.371395000  |
| H  | 0.078298000  | 10.231106000 | 7.505911000  |
| C  | -0.424928000 | 9.619661000  | 11.901600000 |
| H  | -0.408606000 | 8.769419000  | 11.212157000 |
| H  | -1.351705000 | 9.559816000  | 12.483288000 |
| H  | 0.422192000  | 9.512623000  | 12.584841000 |
| C  | -0.622189000 | 12.652756000 | 12.217245000 |
| H  | -0.014028000 | 12.524742000 | 13.114977000 |
| H  | -1.675647000 | 12.646454000 | 12.515053000 |
| H  | -0.422402000 | 13.647096000 | 11.798393000 |
| C  | -1.752133000 | 11.321824000 | 9.740887000  |
| H  | -1.720465000 | 12.223353000 | 9.124779000  |
| H  | -2.698132000 | 11.323902000 | 10.294859000 |
| H  | -1.758269000 | 10.458094000 | 9.072247000  |
| C  | -1.685484000 | 15.186407000 | 9.668729000  |

|   |              |              |              |
|---|--------------|--------------|--------------|
| H | -1.847492000 | 14.280944000 | 10.257762000 |
| H | -2.467927000 | 15.232367000 | 8.903044000  |
| H | -1.813033000 | 16.046713000 | 10.334096000 |
| C | 0.052164000  | 16.753966000 | 7.743825000  |
| H | -0.162024000 | 17.681626000 | 8.283376000  |
| H | -0.717981000 | 16.633851000 | 6.973384000  |
| H | 1.017209000  | 16.863894000 | 7.240705000  |
| C | 0.266065000  | 13.733927000 | 7.743409000  |
| H | 1.148363000  | 13.881179000 | 7.112397000  |
| H | -0.601623000 | 13.603079000 | 7.087841000  |
| H | 0.408256000  | 12.815266000 | 8.318631000  |
| C | 0.426561000  | 17.746464000 | 11.561023000 |
| H | -0.291651000 | 18.089571000 | 10.809535000 |
| H | 0.801901000  | 18.627076000 | 12.094239000 |
| H | -0.108590000 | 17.113950000 | 12.274020000 |
| C | 3.113838000  | 16.431215000 | 12.135887000 |
| H | 2.636838000  | 16.072164000 | 13.048875000 |
| H | 3.627108000  | 17.370650000 | 12.367134000 |
| H | 3.890942000  | 15.711951000 | 11.850595000 |
| C | 2.709790000  | 17.930678000 | 9.540831000  |
| H | 3.509258000  | 17.418000000 | 9.000610000  |
| H | 3.157634000  | 18.766898000 | 10.090382000 |
| H | 2.018998000  | 18.346724000 | 8.804319000  |
| C | 4.371033000  | 11.419540000 | 12.601432000 |
| H | 4.112783000  | 12.130634000 | 13.388328000 |
| H | 4.914165000  | 10.587227000 | 13.062716000 |
| H | 3.435999000  | 11.002574000 | 12.206429000 |
| C | 6.980335000  | 12.979746000 | 12.082508000 |
| H | 7.744635000  | 13.217486000 | 11.335332000 |
| H | 7.432244000  | 12.302033000 | 12.815598000 |
| H | 6.711468000  | 13.909961000 | 12.588423000 |
| C | 6.122137000  | 10.738103000 | 10.222585000 |
| H | 6.541503000  | 9.976638000  | 10.890440000 |
| H | 6.912280000  | 11.052273000 | 9.536556000  |
| H | 5.331600000  | 10.269577000 | 9.632924000  |
| C | 6.039900000  | 15.927688000 | 9.889641000  |
| H | 5.291690000  | 16.576108000 | 10.351027000 |
| H | 6.557889000  | 16.508654000 | 9.118399000  |
| H | 6.772334000  | 15.657465000 | 10.657212000 |
| C | 6.656522000  | 13.480342000 | 8.202585000  |
| H | 7.506475000  | 13.233279000 | 8.846148000  |
| H | 7.025352000  | 14.134573000 | 7.404505000  |
| H | 6.295376000  | 12.556795000 | 7.740748000  |
| C | 3.979819000  | 14.857370000 | 7.845753000  |
| H | 3.718289000  | 13.989141000 | 7.233308000  |
| H | 4.376342000  | 15.633092000 | 7.181761000  |
| H | 3.065065000  | 15.235202000 | 8.310295000  |
| C | -2.007435000 | 12.458065000 | 17.019641000 |
| H | -2.607233000 | 11.559407000 | 16.843196000 |
| H | -2.658379000 | 13.202363000 | 17.486395000 |
| H | -1.233442000 | 12.196158000 | 17.746455000 |
| C | -1.418290000 | 12.973889000 | 15.711798000 |
| H | -2.220022000 | 13.302968000 | 15.044971000 |
| H | -0.880271000 | 12.183917000 | 15.182876000 |
| C | -2.039795000 | 15.996761000 | 14.315346000 |
| H | -2.157451000 | 16.562681000 | 13.385821000 |
| H | -2.291304000 | 16.668999000 | 15.141805000 |
| H | -2.784396000 | 15.195068000 | 14.299114000 |
| C | -0.619593000 | 15.463376000 | 14.429389000 |
| H | 0.108745000  | 16.277846000 | 14.464480000 |
| H | -0.353047000 | 14.867559000 | 13.553609000 |
| C | -0.896030000 | 15.379737000 | 17.319031000 |
| H | -1.944964000 | 15.647906000 | 17.158160000 |
| H | -0.841633000 | 14.744037000 | 18.208483000 |
| C | 0.009656000  | 16.591012000 | 17.463653000 |
| H | -0.159744000 | 17.132902000 | 18.399183000 |
| H | -0.162284000 | 17.292012000 | 16.642338000 |
| C | 2.164203000  | 15.907249000 | 19.203361000 |
| H | 1.336898000  | 15.304957000 | 19.596618000 |
| H | 3.062139000  | 15.298036000 | 19.321341000 |



|   |             |              |              |
|---|-------------|--------------|--------------|
| C | 2.298252000 | 17.214012000 | 19.974713000 |
| H | 1.434760000 | 17.870478000 | 19.824753000 |
| H | 3.191024000 | 17.768624000 | 19.671806000 |
| H | 2.379311000 | 17.024589000 | 21.050549000 |
| C | 2.636351000 | 17.602282000 | 16.852206000 |
| H | 2.398011000 | 18.389903000 | 17.573676000 |
| H | 3.715076000 | 17.424409000 | 16.906937000 |
| C | 2.245920000 | 18.016308000 | 15.439248000 |
| H | 2.305314000 | 17.162905000 | 14.758453000 |
| H | 2.904167000 | 18.802984000 | 15.057993000 |
| H | 1.222535000 | 18.401096000 | 15.397505000 |
| C | 1.669378000 | 10.582447000 | 15.141693000 |
| H | 1.467213000 | 11.449862000 | 14.509865000 |
| H | 1.158256000 | 9.716566000  | 14.710955000 |
| H | 2.744136000 | 10.389146000 | 15.082534000 |
| C | 1.219479000 | 10.819004000 | 16.577075000 |
| H | 1.476708000 | 9.964280000  | 17.211738000 |
| H | 0.134584000 | 10.936719000 | 16.626290000 |
| C | 1.363426000 | 10.943639000 | 19.779910000 |
| H | 0.645393000 | 10.258747000 | 19.320487000 |
| H | 1.085169000 | 11.050554000 | 20.833949000 |
| H | 2.346998000 | 10.464174000 | 19.747779000 |
| C | 1.376571000 | 12.296891000 | 19.079392000 |
| H | 2.018724000 | 13.006591000 | 19.612516000 |
| H | 0.377045000 | 12.744957000 | 19.074157000 |
| C | 3.761239000 | 11.723614000 | 17.551845000 |
| H | 4.102094000 | 12.068145000 | 18.534881000 |
| H | 3.770915000 | 10.629503000 | 17.568021000 |
| C | 4.646348000 | 12.288177000 | 16.450846000 |
| H | 4.419663000 | 11.823913000 | 15.487591000 |
| H | 5.713146000 | 12.143864000 | 16.647898000 |
| C | 5.244920000 | 14.612498000 | 14.808510000 |
| H | 6.215602000 | 14.111647000 | 14.875524000 |
| H | 4.739690000 | 14.217556000 | 13.923570000 |
| C | 5.402475000 | 16.121864000 | 14.688519000 |
| H | 5.940042000 | 16.379778000 | 13.771420000 |
| H | 5.957743000 | 16.544585000 | 15.531992000 |
| H | 4.427785000 | 16.609324000 | 14.643144000 |
| C | 5.149561000 | 14.827233000 | 17.705846000 |
| H | 4.897797000 | 15.890735000 | 17.750810000 |
| H | 4.709429000 | 14.371783000 | 18.598659000 |
| C | 6.661300000 | 14.632777000 | 17.704594000 |
| H | 7.132217000 | 15.096981000 | 16.834300000 |
| H | 6.935322000 | 13.574153000 | 17.704070000 |
| H | 7.105998000 | 15.083098000 | 18.598229000 |

## References

- 1 M. Hirano, M. Akita, T. Morikita, H. Kubo, A. Fukuoka and S. Komiyama, *J. Chem. Soc. Dalton Trans.*, 1997, 3453–3458.
- 2 J. Parry, E. Carmona, S. Coles and M. Hursthouse, *J. Am. Chem. Soc.*, 1995, **117**, 2649–2650.
- 3 R. A. Andersen, *Inorg. Chem.*, 1979, **18**, 1507–1509.
- 4 S. M. Mansell, B. F. Perandones and P. L. Arnold, *J. Organomet. Chem.*, 2010, **695**, 2814–2821.
- 5 S. M. Mansell, N. Kaltsoyannis and P. L. Arnold, *J. Am. Chem. Soc.*, 2011, **133**, 9036–9051.
- 6 D. C. Bradley, J. S. Ghotra and F. A. Hart, *J. Chem. Soc. Dalton Trans.*, 1973, 1021.
- 7 G. Brauer, W. A. Herrmann and F. T. Edelmann, *Synthetic Methods of Organometallic and Inorganic Chemistry*, Georg Thieme Verlag, 1996, **6**, 37.
- 8 M. Xemard, PhD Thesis, Université Paris-Saclay, 2020.
- 9 W. J. Evans, D. K. Drummond, H. Zhang and J. L. Atwood, *Inorg. Chem.*, 1988, **27**, 575–579.
- 10 **CrysAlisPro** (Rigaku, V1.171.43.107a, 2024)
- 11 Sheldrick, G.M., ShelXT-Integrated space-group and crystal-structure determination, *Acta Cryst.*, (2015), **A71**, 3-8.
- 12 O.V. Dolomanov and L.J. Bourhis and R.J. Gildea and J.A.K. Howard and H. Puschmann, Olex2: A complete structure solution, refinement and analysis program, *J. Appl. Cryst.*, (2009), **42**, 339-341.
- 13 Sheldrick, G.M., Crystal structure refinement with ShelXL, *Acta Cryst.*, (2015), **C71**, 3-8.
- 14 (a) A. D. Becke, *J. Chem. Phys.* 1993, **98**, 5648; (b) K. Burke, J. P. Perdew, W. Yang, in *Electronic Density Functional Theory: Recent Progress and New Directions*, Eds: J. F. Dobson, G. Vignale, M. P. Das, Plenum, New York, 1998.
- 15 (a) M. Dolg, U. Wedig, H. Stoll, H. Preuss, *J. Chem. Phys.* 1987, **86**, 866; (b) A. Hollwarth, M. Bohme, S. Dapprich, A.W. Ehlers, A. Gobbi, V. Jonas, K.F. Kohler, R. Stegmann, A. Veldkamp, G. Frenking *J. Chem. Phys.* 1993, **208**, 237; (c) W. Kuechle, M. Dolg, H. Stoll, H. Preuss, *J. Chem. Phys.* 1994, **100**, 7535; (d) X. Cao, M. Dolg, H. Stoll, *J. Chem. Phys.* **118**, 487 (2003) cf. also X. Cao, M. Dolg, *J. Molec. Struct. (Theochem)* 2004, **673**, 203 (e) M. Dolg, H. Stoll, A. Savin, H. Preuss, *Theor. Chim. Acta* 1989, **75**, 173 (f) M. Dolg, H. Stoll, H. Preuss, *Theor. Chim. Acta* 1993, **85**, 441.
- 16 (a) P. C. Hariharan and J. A. Pople, *Theor. Chim. Acta* 1973, **28**, 213; (b) W. J. Hehre, R. Ditchfield and J. A. Pople, *J. Chem. Phys.* 1972, **56**, 2257.
- 17 S. Grimme, S. Ehrlich, L. Goerigk, *J. Comp. Chem.*, 2011, **32**, 1456.
- 18 A. V. Marenich, C. J. Cramer, and D. G. Truhlar, *J. Phys. Chem. B*, 2009, **113**, 6378.
- 19 Gaussian 16, Revision B.01, M. J. Frisch, G. W. Trucks, H. B. Schlegel, G. E. Scuseria, M. A. Robb, J. R. Cheeseman, G. Scalmani, V. Barone, G. A. Petersson, H. Nakatsuji, X. Li, M. Caricato, A. V. Marenich, J. Bloino, B. G. Janesko, R. Gomperts, B. Mennucci, H. P. Hratchian, J. V. Ortiz, A. F. Izmaylov, J. L. Sonnenberg, D. Williams-Young, F. Ding, F. Lipparini, F. Egidi, J. Goings, B. Peng, A. Petrone, T. Henderson, D. Ranasinghe, V. G. Zakrzewski, J. Gao, N. Rega, G. Zheng, W. Liang, M. Hada, M. Ehara, K. Toyota, R. Fukuda, J. Hasegawa, M. Ishida, T. Nakajima, Y. Honda, O. Kitao, H. Nakai, T. Vreven, K. Throssell, J. A. Montgomery, Jr., J. E. Peralta, F. Ogliaro, M. J. Bearpark, J. J. Heyd, E. N. Brothers, K. N. Kudin, V. N. Staroverov, T. A. Keith, R. Kobayashi, J. Normand, K. Raghavachari, A. P. Rendell, J. C. Burant, S. S. Iyengar, J. Tomasi, M. Cossi, J. M. Millam, M. Klene, C. Adamo, R. Cammi, J. W. Ochterski, R. L. Martin, K. Morokuma, O. Farkas, J. B. Foresman, and D. J. Fox, Gaussian, Inc., Wallingford CT, 2016.
